# Supplementary material
Source: Elsevier journal article supplement (https://zenodo.org/records/6330206/files/mmc1.xlsx)
Supplement: mmc1 [file mmc1.xlsx]

## Sheet: Explanation
Category	#	Column heading	Data, interpretation, or comment	Units
A. Identifier/original citation	1	Unique sample ID	Data	n/a
	2	Reference	Data	n/a
B. Fields related to geographic location	3	Region code	Interpretation	n/a
	4	Sub-region	Interpretation	n/a
	5	Latitude	Data	degrees
	6	Longitude	Data	degrees
C. Fields related to horizontal position of RSL	7	Dating method	Data	n/a
	8	Corrected age	Data	14C a BP
	9	Corrected age uncertainty	Data	14C a
	10	Age	Interpretation	cal a BP
	11	Age 2σ Uncertainty +	Interpretation	cal a
	12	Age 2σ Uncertainty -	Interpretation	cal a
D.1 Fields related to stratigraphy from which the sample was obtained	13a	Dated facies	Interpretation	n/a
	13b	Dated material	Interpretation	n/a
	14	Overburden facies (nearest layer)	Interpretation	n/a
	15	Underlying facies (nearest layer)	Interpretation	n/a
	16	Tendency	Interpretation	n/a
	17	Sample depth/Overburden thickness	Data	m
	18	Depth to consolidated substrate	Data	m
	19	Intercalated	Data	yes/no
D.2 Fields related to uncertainties in determining the depth of a sample in a core or section	20	Sampling method	Data	n/a
	21	Sample thickness	Data	m
	22	Sample thickness type	Comment	n/a
	23	Corrected sample thickness	Interpretation	m
	24	Sample thickness uncertainty	Interpretation	m
	25	Sampling uncertainty	Interpretation	m
	26	Core shortening/stretching uncertainty	Interpretation	m
	27	Non-vertical drilling uncertainty	Interpretation	m
D.3 Fields related to uncertainties in determining the absolute elevation of a core or section	28	Tidal uncertainty	Interpretation	m
	29	Water depth uncertainty	Interpretation	m
	30	Leveling uncertainty	Interpretation	m
	31	(d)GPS or RTK uncertainty	Interpretation	m
	32	Benchmark uncertainty	Interpretation	m
	33	Vegetation zone uncertainty	Interpretation	m
	34	Map uncertainty	Interpretation	m
	35	DEM uncertainty	Interpretation	m
	36	Orthometric sample elevation	Data	m
	37	Orthometric datum or MSL epoch	Data	n/a
	38a	Sample elevation	Data	m
	38b	Elevation datum	Comment	n/a
	39	Sample elevation type	Comment	n/a
	40	Sample elevation uncertainty +	Interpretation	m
	41	Sample elevation uncertainty -	Interpretation	m
D.4 Tidal datums	42	MLWS	Interpretation	m
	43	MLWN	Interpretation	m
	44	MLLW	Interpretation	m
	45	MLW	Interpretation	m
	46	MTL	Interpretation	m
	47	MHW	Interpretation	m
	48	MHHW	Interpretation	m
	49	MHWN	Interpretation	m
	50	MHWS	Interpretation	m
	51	HAT	Interpretation	m
D.5 Fields related to uncertainties associate with the sample's indicative meaning	52	Type	Interpretation	n/a
	53	Primary indicator type	Interpretation	n/a
	54	Secondary indicator type	Interpretation	n/a
	55	Supporting evidence	Interpretation	n/a
	56	Sample indicative meaning	Interpretation	n/a
	57	Reference water level	Interpretation	m
	58	Indicative range uncertainty	Interpretation	m
	59	RWL modeling uncertainty	Interpretation	m
	60	IR modeling uncertainty	Interpretation	m
	61	Paleotide-corrected RWL (if any)	Interpretation	m
	62	Paleotide-corrected indicative range (if any)	Interpretation	m
	63	Paleo indicative range change uncertainty (if any)	Interpretation	m
D.6 Fields used to account for effects of sediment compaction and tectonics on sample elevation	64	Compaction correction (if any)	Interpretation	n/a
	65	Compaction correction uncertainty (if any)	Interpretation	n/a
	66	Tectonic correction (if any)	Interpretation	m/ka
	67	Tectonic correction uncertainty (if any)	Interpretation	m/ka
D.7 Fields use to calculate the past position and uncertainty of RSL from each sample	68	RSL 2σ Uncertainty +	Interpretation	m
	69	RSL 2σ Uncertainty +	Interpretation	m
	70	RSL 2σ Uncertainty -	Interpretation	m
	71	Corrected RSL (if any)	Interpretation	m
	72	Corrected RSL uncertainty + (if any)	Interpretation	m
	73	Corrected RSL uncertainty - (if any)	Interpretation	m
	74	Correction type (if any)	Interpretation	n/a
E. Additional notes	75	Reject	Interpretation	n/a
	76	Why rejected?	Comment	n/a
	77	Notes	Comment	n/a

## Sheet: Long-form
	A. Identifier/original citation		B. Fields related to geographic location				C. Fields related to horizontal position of RSL									D.1 Fields related to stratigraphy from which the sample was obtained										D.2 Fields related to uncertainties in determining the depth of a sample in a core or section								D.3 Fields related to uncertainties in determining the absolute elevation of a core or section															D.4 Tidal datums
Unique sample ID	lab_id	Reference	Region code	Subregion code	Latitude	Longitude	Dating method	Reported age	reported age uncertainty	reported reservoir correction	Corrected age (14C a BP)	Corrected age uncertainty (14C a)	Age (cal a BP)	Age 2σ Uncertainty + (cal a)	Age 2σ Uncertainty - (cal a)	Dated facies	Bulk or marine	assumed 13C	Dated material	Overburden facies (nearest layer)	Underlying facies (nearest layer)	Tendency	Sample depth/ Overburden thickness (m)	Depth to consolidated substrate (m)	Intercalated	Sampling method	Sample thickness (m)	Sample thickness type	Corrected sample thickness (m)	Sample thickness uncertainty (m)	Sampling uncertainty (m)	Core shortening/stretching uncertainty (m)	Non-vertical drilling uncertainty (m)	Tidal uncertainty (m)	Water depth uncertainty (m)	Leveling uncertainty (m)	(d)GPS or RTK uncertainty (m)	Benchmark uncertainty (m)	Vegetation zone uncertainty (m)	Map uncertainty (m)	DEM uncertainty (m)	Orthometric sample elevation (m)	Orthometric datum or MSL epoch	Sample elevation (m)	Elevation datum (m)	Sample elevation type	Sample elevation uncertainty + (m)	Sample elevation uncertainty - (m)	MLWS (m)
unique_id	lab_id	ref	region	subregion	lat	lon	dating_method	c14age_rep	c14age_1sig_rep	res_corr	c14age	c14age_1sig	calAge	calAge_2sigpos	calAge_2signeg	facies	bulk_mar		material	over_facies	under_facies	tendency	depth	height_abv_sbstr	intercal	samp_method	samp_thick	samp_thk_type	samp_thk_corr	samp_thk_1sig	smplng_1sig	short_str_1sig	nonvert_1sig	tide_1sig	waterdepth_1sig	leveling_1sig	gps_1sig	bench_1sig	vegzone_1sig	Map uncertainty (m)	dem_1sig	orthoSamp_elev	orthoDatum_epoch	samp_elev	elev_datum	elev_type	samp_elev_1sigpos	samp_elev_1signeg	mlws
1	1	2	3	4	5	6	7	7a	7b	7c	8	9	10	11	12	13a	1 = bulk, 2 = marine, 3=whale	0=wood; 1 = freshwater org_sed; 2 = intermed org_sed; 3 = brackish org_sed; 4 = saline org_sed; 5 = bulk peat; 6 = estuarine carbs; 7 = marine carbs	13b	14	15	16	17	18	19	20	21	22	23	24	25	26	27	28	29	30	31	32	33	34	35	36	37	38a	38b	39	40	41	42
1	Poz-119832	Billah et al. 2020	2	Evenes; Palsvatnet	68.5118	16.73	1	5285	35	0	5285	35	6078.25	108.75	138.25	silty gyttja	0	corr	betula pubescens Betula nana leaf fragments wood fragments	silty gyttja	silty gyttja	negative	n/a	n/a	no	piston corer	3.1	measured	nd	0	0.05	0	0	0	0	0.3	0.01	0.1	0	0	0	0.14	NN2000	23.74	MSL	midpoint	0.320312	0.320312	-1.20189
2	Poz-119833	Billah et al. 2020	2	Evenes; Palsvatnet	68.5118	16.73	1	5535	35	0	5535	36	6343	54	58	silty gyttja	0	corr	betula pubescens Betula nana leaf fragments wood fragments	silty gyttja	silty gyttja	negative	n/a	n/a	no	piston corer	3.1	measured	nd	0	0.05	0	0	0	0	0.3	0.01	0.1	0	0	0	0.14	NN2000	23.74	MSL	midpoint	0.320312	0.320312	-1.20189
3	Poz-108993	Billah et al. 2020	2	Evenes	68.5363	16.78	1	9610	60	0	9610	37	10950.2	219.8	176.2	silty gyttja	0	corr	twigs leaf fragment	topset sediment	foreset sediment	negative	n/a	n/a	no	piston corer	3.1	measured	nd	0	0.05	0	0	0	0	0.3	0.01	0.1	0	5	0	0.14	NN2000	74.49	MSL	midpoint	5.01025	5.01025	-1.15791
4	Poz-119899	Vetti et al. 2020	2	Nykvåg; lundvatnet	68.7736	14.5108	1	9890	50	0	9890	50	11277	324	76	nd	0	corr	nd	nd	nd	nd	n/a	n/a	no	nd	n/a	n/a	n/a	0	0	0	0	0	0	0.5	0	0.1	0	0	0	nd	NN2000	11.6	MSL	midpoint	0.509902	0.509902	-0.951181
5	Poz-119900	Vetti et al. 2020	2	Nykvåg; lundvatnet	68.7736	14.5108	1	12090	60	0	12090	60	13965	114	162	nd	0	corr	nd	nd	nd	nd	n/a	n/a	no	nd	n/a	n/a	n/a	0	0	0	0	0	0	0.5	0	0.1	0	0	0	nd	NN2000	11.6	MSL	midpoint	0.509902	0.509902	-0.951181
6	Poz-119901	Vetti et al. 2020	2	Nykvåg; lundvatnet	68.7736	14.5108	1	13440	70	0	13440	70	16196.5	213.5	240.5	nd	0	corr	nd	nd	nd	nd	n/a	n/a	no	nd	n/a	n/a	n/a	0	0	0	0	0	0	0.5	0	0.1	0	0	0	nd	NN2000	11.6	MSL	midpoint	0.509902	0.509902	-0.951181
7	Poz-119902	Vetti et al. 2020	2	Nykvåg; Toftvatnet	68.7776	14.5086	1	9830	50	0	9830	50	11231	159	53	nd	0	corr	nd	nd	nd	nd	n/a	n/a	no	nd	n/a	n/a	n/a	0	0	0	0	0	0	1.3	0	0.1	0	0	0	nd	NN2000	10.7	MSL	midpoint	1.30384	1.30384	-0.951107
8	Poz-119903	Vetti et al. 2020	2	Nykvåg; Toftvatnet	68.7776	14.5086	1	11850	60	0	11850	60	13685.2	287.833	171.167	nd	0	corr	nd	nd	nd	nd	n/a	n/a	no	nd	n/a	n/a	n/a	0	0	0	0	0	0	1.3	0	0.1	0	0	0	nd	NN2000	10.7	MSL	midpoint	1.30384	1.30384	-0.951107
9	Poz-119905	Vetti et al. 2020	2	Nykvåg; Toftvatnet	68.7776	14.5086	1	11960	60	0	11960	60	13869.3	164.667	257.333	nd	0	corr	nd	nd	nd	nd	n/a	n/a	no	nd	n/a	n/a	n/a	0	0	0	0	0	0	1.3	0	0.1	0	0	0	nd	NN2000	10.7	MSL	midpoint	1.30384	1.30384	-0.951107
10	Poz-119906	Vetti et al. 2020	2	Nykvåg; Toftvatnet	68.7776	14.5086	1	12380	60	0	12380	60	14583.8	277.25	423.75	nd	0	corr	unknown moss	nd	nd	nd	n/a	n/a	no	nd	n/a	n/a	n/a	0	0	0	0	0	0	1.3	0	0.1	0	0	0	nd	NN2000	10.7	MSL	midpoint	1.30384	1.30384	-0.951107
11	Poz-119907	Vetti et al. 2020	2	Nykvåg; Toftvatnet	68.7776	14.5086	1	13500	70	0	13500	70	16275.5	237.5	234.5	nd	0	corr	shell	nd	nd	nd	n/a	n/a	no	nd	n/a	n/a	n/a	0	0	0	0	0	0	1.3	0	0.1	0	0	0	nd	NN2000	10.7	MSL	midpoint	1.30384	1.30384	-0.951107
12	Poz-119908	Vetti et al. 2020	2	Nykvåg; Toftvatnet	68.7776	14.5086	1	13380	90	0	13380	90	16108.5	250.5	299.5	nd	0	corr	nd	nd	nd	nd	n/a	n/a	no	nd	n/a	n/a	n/a	0	0	0	0	0	0	1.3	0	0.1	0	0	0	nd	NN2000	10.7	MSL	midpoint	1.30384	1.30384	-0.951107
13	Poz-109217	Lid et al. 2019	2	skanland; svartvatnet	68.52	16.72	1	8510	50	0	8510	38	9515	26	45	gyttja	0	corr	betula fruit	gyttja	sand	negative	n/a	0.5	no	russian corer	nd	nd	nd	0	0.05	0	0	0	0	0.3	0.01	0.1	0	0	0	nd	NN2000	38.9	MSL	midpoint	0.320312	0.320312	-1.17804
14	Poz-108993	Lid et al. 2019	2	skanland; store trosevatnet	68.5845	16.69	1	9610	60	0	9610	39	10960.4	209.625	187.375	silty gyttja	0	corr	twigs leaf fragment	gyttja	sand	negative	n/a	n/a	no	russian corer	nd	nd	nd	0	0.05	0	0	0	0	0.3	0.01	0.1	0	0	0	nd	NN2000	73.5	MSL	midpoint	0.320312	0.320312	-1.1399
15	Poz-110093	Midtun 2019	2	Lofoten; leknes	68.1587	13.74	1	7020	35	0	7020	40	7854.83	83.1667	108.833	gyttja	0	corr	alnus betula leaf fragments	marine gyttja	lacustrine gyttja	positive	n/a	n/a	no	russian corer	nd	nd	nd	0	0.05	0	0	0	0	0.3	0.01	0.1	0	0	0	nd	NN2000	6.5	MSL	midpoint	0.320312	0.320312	-1.31195
16	Poz-110136	Midtun 2019	2	Lofoten; leknes	68.1587	13.74	1	4835	35	0	4835	41	5541	110	67	gyttja	0	corr	alnus betula leaf fragments	lacustrine gyttja	marine gyttja	negative	n/a	n/a	no	russian corer	nd	nd	nd	0	0.05	0	0	0	0	0.3	0.01	0.1	0	0	0	nd	NN2000	6.5	MSL	midpoint	0.320312	0.320312	-1.31195
17	Poz-86910	ystgaard et al. 2019	2	Agdenes; litjvatnet	63.5772	9.63	1	1760	40	0	1760	42	1662.67	61.3333	116.667	gyttja	0	corr	twig with unharmed cortex	clay and silt	gyttja	negative	n/a	n/a	n/a	russian corer	nd	nd	nd	0	0.05	0	0	0	0	0.3	0.01	0.1	0	0	0	nd	NN2000	5	MSL	midpoint	0.320312	0.320312	-1.14773
18	Poz-86897	ystgaard et al. 2019	2	Agdenes; storvatnet	63.5997	9.63	1	1750	30	0	1750	43	1660.33	56.6667	118.333	anoxic laminated silt	0	corr	conifer needle leaf fragments	lacustrine gyttja	marine silt	negative	n/a	n/a	n/a	nd	nd	nd	nd	0	0.05	0	0	0	0	0.3	0.01	0.1	0	0	0	nd	NN2000	6	MSL	midpoint	0.320312	0.320312	-1.14483
19	Poz-86869	ystgaard et al. 2019	2	Bjugn; eidsvatnet	63.7374	9.84	1	2170	30	0	2170	44	2203.5	110.5	197.5	laminated silt with organic remains	0	corr	betula seeds and leaf fragments	nd	nd	negative	n/a	n/a	n/a	nd	nd	nd	nd	0	0.05	0	0	0	0	0.3	0.01	0.1	0	0	0	nd	NN2000	10	MSL	midpoint	0.320312	0.320312	-1.05959
20	Beta-439746	Vasskog et al. 2019	2	Karmoy; kringlemyr	59.1602	5.22	1	13300	50	0	13300	45	15984.5	175.5	178.5	laminated silt	0	corr	terrestrial plant macrofossils	aquatic moss layers	laminated silt	negative	n/a	n/a	n/a	nd	nd	nd	nd	0	0.05	0	0	0	0	0.3	0.018	0.1	0	0	0	-0.08	NN2000	11.989	MSL	midpoint	0.320662	0.320662	-0.322026
21	Beta-419386	Vasskog et al. 2019	2	Karmoy; grotheimsvatnet	59.1636	5.22	1	15190	50	0	15190	50	18473	188	189	silt	0	corr	foraminifera	silt	diamicton	negative	n/a	n/a	n/a	russian corer	5 cm	nd	nd	0	0.05	0	0	0	0	0.3	0.016	0.1	0	0	0	-0.08	NN2000	15.648	MSL	midpoint	0.320556	0.320556	-0.322395
22	Beta-415029	Bondevik et al. 2019	2	Flemsoya; Longva; locality 65; Site 1b (104.5 x j 151 y); sample LO-34; Layer E	62.6682	6.27124	1	6570	30	0	6570	30	7444.25	115.75	17.25	beach gravel	0	corr	Hazelnut shell	n/a	peat	negative	nd	nd	no	by hand	nd	nd	nd	0	0.05	0	0	0	0	0.5	0	0.1	0	0	0	0.05	NN2000	9.5	MSL	midpoint	0.512348	0.512348	-0.992386
23	Beta-415028	Bondevik et al. 2019	2	Flemsoya; Longva; locality 65; Site 1b (104.5 x j 166 y); sample LO-33; Layer E	62.6682	6.27124	1	6140	30	0	6140	30	7033.17	123.833	86.1667	beach gravel	0	corr	Hazelnut shell	n/a	peat	negative	nd	nd	no	by hand	nd	nd	nd	0	0.05	0	0	0	0	0.5	0	0.1	0	0	0	0.05	NN2000	9.5	MSL	midpoint	0.512348	0.512348	-0.992386
24	Beta-458883	Bondevik et al. 2019	2	Flemsoya; Longva; locality 65; Site 1b (104.5 x j 151 y); sample LO-74; Layer E	62.6682	6.27124	1	6440	30	0	6440	30	7372.5	51.5	90.5	beach gravel	0	corr	Hazelnut shell	n/a	peat	negative	nd	nd	no	by hand	nd	nd	nd	0	0.05	0	0	0	0	0.5	0	0.1	0	0	0	0.05	NN2000	9.5	MSL	midpoint	0.512348	0.512348	-0.992386
25	Beta-458884	Bondevik et al. 2019	2	Flemsoya; Longva; locality 65; Site 1b (104.5 x j 151 y); sample LO-75; Layer E	62.6682	6.27124	1	6400	30	0	6400	30	7337.33	83.6667	75.3333	beach gravel	0	corr	Charcoal (Betula sp.)	n/a	peat	negative	nd	nd	no	by hand	nd	nd	nd	0	0.05	0	0	0	0	0.5	0	0.1	0	0	0	0.05	NN2000	9.5	MSL	midpoint	0.512348	0.512348	-0.992386
26	Beta-458885	Bondevik et al. 2019	2	Flemsoya; Longva; locality 65; Site 1b (104.5 x j 151 y); sample LO-76; Layer E	62.6682	6.27124	1	6740	30	0	6740	30	7593.5	70.5	73.5	beach gravel	0	corr	Charcoal (Betula sp.)	n/a	peat	negative	nd	nd	no	by hand	nd	nd	nd	0	0.05	0	0	0	0	0.5	0	0.1	0	0	0	0.05	NN2000	9.5	MSL	midpoint	0.512348	0.512348	-0.992386
27	Beta-458886	Bondevik et al. 2019	2	Flemsoya; Longva; locality 65; Site 1b (104.5 x j 151 y); sample LO-77; Layer E/G	62.6682	6.27124	1	6880	30	0	6880	30	7697	92	74	beach gravel	0	corr	Charcoal (Betula sp.)	n/a	peat	negative	nd	nd	no	by hand	nd	nd	nd	0	0.05	0	0	0	0	0.5	0	0.1	0	0	0	0.05	NN2000	9.5	MSL	midpoint	0.512348	0.512348	-0.992386
28	Beta-458882	Bondevik et al. 2019	2	Flemsoya; Longva; locality 65; Site 1b (104.5 x j 151 y); sample LO-73; Layer E (top)	62.6682	6.27124	1	6220	30	0	6220	30	7129.25	119.75	125.25	beach gravel	0	corr	Charcoal (Betula sp.)	n/a	peat	negative	nd	nd	no	by hand	nd	nd	nd	0	0.05	0	0	0	0	0.2	0	0.1	0	0	0	0.05	NN2000	9.8	MSL	midpoint	0.229129	0.229129	-0.992386
29	Beta-415030	Bondevik et al. 2019	2	Flemsoya; Longva; locality 65; Site 1b (105 x j 141 y);; sample LO-35; Layer E	62.6682	6.27124	1	6520	30	0	6520	30	7418.33	86.6667	87.3333	beach gravel	0	corr	Hazelnut shell	n/a	peat	negative	nd	nd	no	by hand	nd	nd	nd	0	0.05	0	0	0	0	0.5	0	0.1	0	0	0	0.05	NN2000	9.5	MSL	midpoint	0.512348	0.512348	-0.992386
30	Beta-415031	Bondevik et al. 2019	2	Flemsoya; Longva; locality 65; Site 1b (105 x j 141 y);; sample LO-36; Layer E	62.6682	6.27124	1	6480	30	0	6480	30	7378.5	49.5	56.5	beach gravel	0	corr	Hazelnut shell	n/a	peat	negative	nd	nd	no	by hand	nd	nd	nd	0	0.05	0	0	0	0	0.5	0	0.1	0	0	0	0.05	NN2000	9.5	MSL	midpoint	0.512348	0.512348	-0.992386
31	Beta-389722	Bondevik et al. 2019	2	Flemsoya; Longva; locality 65; Site 1b (107 x j 143 y); sample LO-20; Layer E (base)	62.6682	6.27124	1	6680	30	0	6680	30	7547.5	59.5	60.5	beach gravel	0	corr	Hazelnut shell	n/a	peat	negative	nd	nd	no	by hand	nd	nd	nd	0	0.05	0	0	0	0	0.2	0	0.1	0	0	0	0.05	NN2000	9.3	MSL	midpoint	0.229129	0.229129	-0.992386
32	Beta-389720	Bondevik et al. 2019	2	Flemsoya; Longva; locality 65; Site 1b (107 x j 143 y); sample LO-18; Layer E (top)	62.6682	6.27124	1	6160	30	0	6160	30	7086.62	72.375	125.625	beach gravel	0	corr	Hazelnut shell	n/a	peat	negative	nd	nd	no	by hand	nd	nd	nd	0	0.05	0	0	0	0	0.2	0	0.1	0	0	0	0.05	NN2000	9.8	MSL	midpoint	0.229129	0.229129	-0.992386
33	Beta-389721	Bondevik et al. 2019	2	Flemsoya; Longva; locality 65; Site 1b (107 x j 143 y); sample LO-19; Layer E (middle)	62.6682	6.27124	1	6070	30	0	6070	30	6921.5	227.5	122.5	beach gravel	0	corr	Charcoal (Betula sp.)	n/a	peat	negative	nd	nd	no	by hand	nd	nd	nd	0	0.05	0	0	0	0	0.2	0	0.1	0	0	0	0.05	NN2000	9.5	MSL	midpoint	0.229129	0.229129	-0.992386
34	Beta-458888	Bondevik et al. 2019	2	Flemsoya; Longva; locality 65; Site 1b (108 x j 155 y); sample LO-79; Layer D	62.6682	6.27124	1	6310	30	0	6310	30	7221	84	57	peat	0	corr	Hazelnut shell	beach gravel	gravel	negative	nd	nd	no	by hand	nd	nd	nd	0	0.05	0	0	0	0	0.2	0	0.1	0	0	0	0.05	NN2000	9.5	MSL	midpoint	0.229129	0.229129	-0.992386
35	Beta-428849	Bondevik et al. 2019	2	Flemsoya; Longva; locality 65; Site 2a (105 x j 166 y); sample LO-50; Layer E (top)	62.6682	6.27124	1	5150	30	0	5150	30	5916.5	74.5	158.5	beach gravel	0	corr	Hazelnut shell	n/a	peat	negative	nd	nd	no	by hand	nd	nd	nd	0	0.05	0	0	0	0	0.2	0	0.1	0	0	0	0.05	NN2000	9.8	MSL	midpoint	0.229129	0.229129	-0.992386
36	Beta-428850	Bondevik et al. 2019	2	Flemsoya; Longva; locality 65; Site 2a (105 x j 166 y); sample LO-51; Layer E	62.6682	6.27124	1	6020	30	0	6020	30	6837.75	109.25	84.75	beach gravel	0	corr	Hazelnut shell	n/a	peat	negative	nd	nd	no	by hand	nd	nd	nd	0	0.05	0	0	0	0	0.5	0	0.1	0	0	0	0.05	NN2000	9.5	MSL	midpoint	0.512348	0.512348	-0.992386
37	Beta-458899	Bondevik et al. 2019	2	Flemsoya; Longva; locality 65; Site 2a (105 x j 166 y); sample LO-90; Layer E	62.6682	6.27124	1	5830	30	0	5830	30	6611.75	125.25	102.75	beach gravel	0	corr	Hazelnut shell	n/a	peat	negative	nd	nd	no	by hand	nd	nd	nd	0	0.05	0	0	0	0	0.5	0	0.1	0	0	0	0.05	NN2000	9.5	MSL	midpoint	0.512348	0.512348	-0.992386
38	Beta-458900	Bondevik et al. 2019	2	Flemsoya; Longva; locality 65; Site 2a (105 x j 166 y); sample LO-91; Layer E (base)	62.6682	6.27124	1	6500	30	0	6500	30	7379.17	96.8333	54.1667	beach gravel	0	corr	Charcoal (Betula sp.)	n/a	peat	negative	nd	nd	no	by hand	nd	nd	nd	0	0.05	0	0	0	0	0.2	0	0.1	0	0	0	0.05	NN2000	9.3	MSL	midpoint	0.229129	0.229129	-0.992386
39	Beta-472532	Bondevik et al. 2019	2	Flemsoya; Longva; locality 65; Site 2a (105 x j 166 y);; sample LO-104; Layer E (base)	62.6682	6.27124	1	6050	30	0	6050	30	6887.25	96.75	91.25	beach gravel	0	corr	Hazelnut shell	n/a	peat	negative	nd	nd	no	by hand	nd	nd	nd	0	0.05	0	0	0	0	0.2	0	0.1	0	0	0	0.05	NN2000	9.3	MSL	midpoint	0.229129	0.229129	-0.992386
40	Beta-472533	Bondevik et al. 2019	2	Flemsoya; Longva; locality 65; Site 2a (105 x j 166 y);; sample LO-105; Layer E	62.6682	6.27124	1	6270	30	0	6270	30	7197.75	68.25	163.75	beach gravel	0	corr	Hazelnut shell	n/a	peat	negative	nd	nd	no	by hand	nd	nd	nd	0	0.05	0	0	0	0	0.5	0	0.1	0	0	0	0.05	NN2000	9.5	MSL	midpoint	0.512348	0.512348	-0.992386
41	Beta-472534	Bondevik et al. 2019	2	Flemsoya; Longva; locality 65; Site 2a (105 x j 166 y);; sample LO-106; Layer E	62.6682	6.27124	1	6180	30	0	6180	30	7106.5	57.5	141.5	beach gravel	0	corr	Hazelnut shell	n/a	peat	negative	nd	nd	no	by hand	nd	nd	nd	0	0.05	0	0	0	0	0.5	0	0.1	0	0	0	0.05	NN2000	9.5	MSL	midpoint	0.512348	0.512348	-0.992386
42	Beta-472535	Bondevik et al. 2019	2	Flemsoya; Longva; locality 65; Site 2a (105 x j 166 y);; sample LO-107; Layer E	62.6682	6.27124	1	6140	30	0	6140	30	7033.17	123.833	86.1667	beach gravel	0	corr	Hazelnut shell	n/a	peat	negative	nd	nd	no	by hand	nd	nd	nd	0	0.05	0	0	0	0	0.5	0	0.1	0	0	0	0.05	NN2000	9.5	MSL	midpoint	0.512348	0.512348	-0.992386
43	Beta-472536	Bondevik et al. 2019	2	Flemsoya; Longva; locality 65; Site 2a (105 x j 166 y);; sample LO-108; Layer E (top)	62.6682	6.27124	1	6160	30	0	6160	30	7086.62	72.375	125.625	beach gravel	0	corr	Hazelnut shell	n/a	peat	negative	nd	nd	no	by hand	nd	nd	nd	0	0.05	0	0	0	0	0.2	0	0.1	0	0	0	0.05	NN2000	9.8	MSL	midpoint	0.229129	0.229129	-0.992386
44	Beta-472527	Bondevik et al. 2019	2	Flemsoya; Longva; locality 65; Site 2a (106 x j 166 y);; sample LO-99; Layer E (base)	62.6682	6.27124	1	6100	30	0	6100	30	7055	100	199	beach gravel	0	corr	Hazelnut shell	n/a	peat	negative	nd	nd	no	by hand	nd	nd	nd	0	0.05	0	0	0	0	0.2	0	0.1	0	0	0	0.05	NN2000	9.3	MSL	midpoint	0.229129	0.229129	-0.992386
45	Beta-472528	Bondevik et al. 2019	2	Flemsoya; Longva; locality 65; Site 2a (106 x j 166 y);; sample LO-100; Layer E	62.6682	6.27124	1	6080	30	0	6080	30	6926.5	224.5	125.5	beach gravel	0	corr	Hazelnut shell	n/a	peat	negative	nd	nd	no	by hand	nd	nd	nd	0	0.05	0	0	0	0	0.5	0	0.1	0	0	0	0.05	NN2000	9.5	MSL	midpoint	0.512348	0.512348	-0.992386
46	Beta-472529	Bondevik et al. 2019	2	Flemsoya; Longva; locality 65; Site 2a (106 x j 166 y);; sample LO-101; Layer E	62.6682	6.27124	1	5420	30	0	5420	30	6241.5	49.5	116.5	beach gravel	0	corr	Hazelnut shell	n/a	peat	negative	nd	nd	no	by hand	nd	nd	nd	0	0.05	0	0	0	0	0.5	0	0.1	0	0	0	0.05	NN2000	9.5	MSL	midpoint	0.512348	0.512348	-0.992386
47	Beta-472530	Bondevik et al. 2019	2	Flemsoya; Longva; locality 65; Site 2a (106 x j 166 y);; sample LO-102; Layer E	62.6682	6.27124	1	5250	30	0	5250	30	6015.5	160.5	87.5	beach gravel	0	corr	Hazelnut shell	n/a	peat	negative	nd	nd	no	by hand	nd	nd	nd	0	0.05	0	0	0	0	0.5	0	0.1	0	0	0	0.05	NN2000	9.5	MSL	midpoint	0.512348	0.512348	-0.992386
48	Beta-472531	Bondevik et al. 2019	2	Flemsoya; Longva; locality 65; Site 2a (106 x j 166 y);; sample LO-103; Layer E (top)	62.6682	6.27124	1	5460	30	0	5460	30	6254.75	49.25	54.75	beach gravel	0	corr	Hazelnut shell	n/a	peat	negative	nd	nd	no	by hand	nd	nd	nd	0	0.05	0	0	0	0	0.2	0	0.1	0	0	0	0.05	NN2000	9.8	MSL	midpoint	0.229129	0.229129	-0.992386
49	Beta-428843	Bondevik et al. 2019	2	Flemsoya; Longva; locality 65; Site 2a (107 x j 162 y); sample LO-44; Layer E/F	62.6682	6.27124	1	6230	40	0	6230	40	7129.12	124.875	125.125	beach gravel	0	corr	Hazelnut shell	n/a	peat	negative	nd	nd	no	by hand	nd	nd	nd	0	0.05	0	0	0	0	0.2	0	0.1	0	0	0	0.05	NN2000	9.5	MSL	midpoint	0.229129	0.229129	-0.992386
50	Beta-389708	Bondevik et al. 2019	2	Flemsoya; Longva; locality 65; Site 2a (107 x j 163 y); sample LO-6; Layer D/E (top)	62.6682	6.27124	1	4730	30	0	4730	30	5431.5	147.5	104.5	beach gravel	0	corr	Charcoal (Betula sp.)	n/a	peat	negative	nd	nd	no	by hand	nd	nd	nd	0	0.05	0	0	0	0	0.2	0	0.1	0	0	0	0.05	NN2000	9.5	MSL	midpoint	0.229129	0.229129	-0.992386
51	Beta-389704	Bondevik et al. 2019	2	Flemsoya; Longva; locality 65; Site 2a (107 x j 159 y); sample LO-2; Layer E (top)	62.6682	6.27124	1	5230	30	0	5230	30	5972.75	198.25	57.75	beach gravel	0	corr	Hazelnut shell	n/a	peat	negative	nd	nd	no	by hand	nd	nd	nd	0	0.05	0	0	0	0	0.2	0	0.1	0	0	0	0.05	NN2000	9.8	MSL	midpoint	0.229129	0.229129	-0.992386
52	Beta-389705	Bondevik et al. 2019	2	Flemsoya; Longva; locality 65; Site 2a (107 x j 159 y); sample LO-3; Layer E (middle)	62.6682	6.27124	1	5220	30	0	5220	30	5965.83	201.167	53.8333	beach gravel	0	corr	Hazelnut shell	n/a	peat	negative	nd	nd	no	by hand	nd	nd	nd	0	0.05	0	0	0	0	0.2	0	0.1	0	0	0	0.05	NN2000	9.5	MSL	midpoint	0.229129	0.229129	-0.992386
53	Beta-428841	Bondevik et al. 2019	2	Flemsoya; Longva; locality 65; Site 2a (107 x j 162 y); sample LO-42; Layer D	62.6682	6.27124	1	5250	30	0	5250	30	6015.5	160.5	87.5	peat	0	corr	Hazelnut shell	beach gravel	gravel	negative	nd	nd	no	by hand	nd	nd	nd	0	0.05	0	0	0	0	0.2	0	0.1	0	0	0	0.05	NN2000	9.5	MSL	midpoint	0.229129	0.229129	-0.992386
54	Beta-428842	Bondevik et al. 2019	2	Flemsoya; Longva; locality 65; Site 2a (107 x j 162 y); sample LO-43; Layer E	62.6682	6.27124	1	5250	30	0	5250	30	6015.5	160.5	87.5	beach gravel	0	corr	Hazelnut shell	n/a	peat	negative	nd	nd	no	by hand	nd	nd	nd	0	0.05	0	0	0	0	0.5	0	0.1	0	0	0	0.05	NN2000	9.5	MSL	midpoint	0.512348	0.512348	-0.992386
55	Beta-389706	Bondevik et al. 2019	2	Flemsoya; Longva; locality 65; Site 2a (107 x j 159 y); sample LO-4; Layer E (base)/F	62.6682	6.27124	1	5800	30	0	5800	30	6607.67	60.3333	108.667	beach gravel	0	corr	Hazelnut shell	n/a	peat	negative	nd	nd	no	by hand	nd	nd	nd	0	0.05	0	0	0	0	0.2	0	0.1	0	0	0	0.05	NN2000	9.3	MSL	midpoint	0.229129	0.229129	-0.992386
56	Beta-389709	Bondevik et al. 2019	2	Flemsoya; Longva; locality 65; Site 2a (107 x j 163 y); sample LO-7; Layer D/E (middle)	62.6682	6.27124	1	6140	30	0	6140	30	7033.17	123.833	86.1667	beach gravel	0	corr	Charcoal (Betula sp.)	n/a	peat	negative	nd	nd	no	by hand	nd	nd	nd	0	0.05	0	0	0	0	0.2	0	0.1	0	0	0	0.05	NN2000	9.5	MSL	midpoint	0.229129	0.229129	-0.992386
57	Beta-428853	Bondevik et al. 2019	2	Flemsoya; Longva; locality 65; Site 2b (105 x j 170 y);; sample LO-54; Layer E	62.6682	6.27124	1	5330	30	0	5330	30	6108.2	154.8	108.2	beach gravel	0	corr	Hazelnut shell	n/a	peat	negative	nd	nd	no	by hand	nd	nd	nd	0	0.05	0	0	0	0	0.5	0	0.1	0	0	0	0.05	NN2000	9.5	MSL	midpoint	0.512348	0.512348	-0.992386
58	Beta-431633	Bondevik et al. 2019	2	Flemsoya; Longva; locality 65; Site 2b (105 x j 170 y);; sample LO-55; Layer E	62.6682	6.27124	1	6440	30	0	6440	30	7372.5	51.5	90.5	beach gravel	0	corr	Hazelnut shell	n/a	peat	negative	nd	nd	no	by hand	nd	nd	nd	0	0.05	0	0	0	0	0.5	0	0.1	0	0	0	0.05	NN2000	9.5	MSL	midpoint	0.512348	0.512348	-0.992386
59	Beta-389711	Bondevik et al. 2019	2	Flemsoya; Longva; locality 65; Site 2b (107 x j 172 y); sample LO-9; Layer E (top)	62.6682	6.27124	1	4830	30	0	4830	30	5540.5	58.5	62.5	beach gravel	0	corr	Charcoal (Salix sp.)	n/a	peat	negative	nd	nd	no	by hand	nd	nd	nd	0	0.05	0	0	0	0	0.2	0	0.1	0	0	0	0.05	NN2000	9.8	MSL	midpoint	0.229129	0.229129	-0.992386
60	Beta-389712	Bondevik et al. 2019	2	Flemsoya; Longva; locality 65; Site 2b (107 x j172 y);; sample LO-10; Layer E (base)	62.6682	6.27124	1	6110	30	0	6110	30	7056.75	99.25	168.75	beach gravel	0	corr	Charcoal (Betula sp.)	n/a	peat	negative	nd	nd	no	by hand	nd	nd	nd	0	0.05	0	0	0	0	0.2	0	0.1	0	0	0	0.05	NN2000	9.3	MSL	midpoint	0.229129	0.229129	-0.992386
61	Beta-428846	Bondevik et al. 2019	2	Flemsoya; Longva; locality 65; Site 3 (105 x j 200 y);; sample LO-47; Layer E	62.6682	6.27124	1	6560	40	0	6560	40	7444	122	77	beach gravel	0	corr	Charcoal (Betula sp.)	n/a	peat	negative	nd	nd	no	by hand	nd	nd	nd	0	0.05	0	0	0	0	0.5	0	0.1	0	0	0	0.05	NN2000	9.5	MSL	midpoint	0.512348	0.512348	-0.992386
62	Beta-428844	Bondevik et al. 2019	2	Flemsoya; Longva; locality 65; Site 3 (105 x j 201 y); sample LO-45; Layer F	62.6682	6.27124	1	7010	30	0	7010	30	7853.5	78.5	101.5	peat	0	corr	Birchbark	beach gravel	gravel	negative	nd	nd	no	by hand	nd	nd	nd	0	0.05	0	0	0	0	0.2	0	0.1	0	0	0	0.05	NN2000	9.3	MSL	midpoint	0.229129	0.229129	-0.992386
63	Beta-428847	Bondevik et al. 2019	2	Flemsoya; Longva; locality 65; Site 3 (105 x j 201 y);; sample LO-48; Layer E	62.6682	6.27124	1	5980	30	0	5980	30	6793.67	138.333	59.6667	beach gravel	0	corr	Charcoal (Betula sp.)	n/a	peat	negative	nd	nd	no	by hand	nd	nd	nd	0	0.05	0	0	0	0	0.5	0	0.1	0	0	0	0.05	NN2000	9.5	MSL	midpoint	0.512348	0.512348	-0.992386
64	Beta-468567	Bondevik et al. 2019	2	Flemsoya; Longva; locality 65; Site 3 (106 x j 199 y); sample LO-93; Layer F	62.6682	6.27124	1	6500	30	0	6500	30	7379.17	96.8333	54.1667	cultural layer	0	corr	Birchbark	n/a	peat	negative	nd	nd	no	by hand	nd	nd	nd	0	0.05	0	0	0	0	0.2	0	0.1	0	0	0	0.05	NN2000	9.3	MSL	midpoint	0.229129	0.229129	-0.992386
65	Beta-428845	Bondevik et al. 2019	2	Flemsoya; Longva; locality 65; Site 3 (106 x j 203 y); sample LO-46; Layer F	62.6682	6.27124	1	6870	40	0	6870	40	7697	93	83	cultural layer	0	corr	Birchbark	n/a	peat	negative	nd	nd	no	by hand	nd	nd	nd	0	0.05	0	0	0	0	0.2	0	0.1	0	0	0	0.05	NN2000	9.3	MSL	midpoint	0.229129	0.229129	-0.992386
66	Beta-428851	Bondevik et al. 2019	2	Flemsoya; Longva; locality 65; Site 3 (106 x j 205 y); sample LO-52; Layer D/E	62.6682	6.27124	1	6130	30	0	6130	30	7061.75	95.25	153.75	beach gravel	0	corr	Hazelnut shell	n/a	peat	negative	nd	nd	no	by hand	nd	nd	nd	0	0.05	0	0	0	0	0.5	0	0.1	0	0	0	0.05	NN2000	9.5	MSL	midpoint	0.512348	0.512348	-0.992386
67	Beta-428852	Bondevik et al. 2019	2	Flemsoya; Longva; locality 65; Site 3 (106 x j 205 y); sample LO-53; Layer E	62.6682	6.27124	1	6100	30	0	6100	30	7055	100	199	beach gravel	0	corr	Hazelnut shell	n/a	peat	negative	nd	nd	no	by hand	nd	nd	nd	0	0.05	0	0	0	0	0.5	0	0.1	0	0	0	0.05	NN2000	9.5	MSL	midpoint	0.512348	0.512348	-0.992386
68	Beta-458901	Bondevik et al. 2019	2	Flemsoya; Longva; locality 65; Site 3 (106 x j 205 y); sample LO-92; Layer E (middle)	62.6682	6.27124	1	6070	30	0	6070	30	6921.5	227.5	122.5	beach gravel	0	corr	Hazelnut shell	n/a	peat	negative	nd	nd	no	by hand	nd	nd	nd	0	0.05	0	0	0	0	0.2	0	0.1	0	0	0	0.05	NN2000	9.5	MSL	midpoint	0.229129	0.229129	-0.992386
69	Beta-458894	Bondevik et al. 2019	2	Flemsoya; Longva; locality 65; Site 3 (107 x j 188 y); sample LO-85; Layer E (top)	62.6682	6.27124	1	6120	30	0	6120	30	7058.5	97.5	161.5	beach gravel	0	corr	Charcoal (Betula sp.)	n/a	peat	negative	nd	nd	no	by hand	nd	nd	nd	0	0.05	0	0	0	0	0.2	0	0.1	0	0	0	0.05	NN2000	9.8	MSL	midpoint	0.229129	0.229129	-0.992386
70	Beta-458895	Bondevik et al. 2019	2	Flemsoya; Longva; locality 65; Site 3 (107 x j 188 y); sample LO-86; Layer E	62.6682	6.27124	1	6360	30	0	6360	30	7286.75	129.25	116.75	beach gravel	0	corr	Hazelnut shell	n/a	peat	negative	nd	nd	no	by hand	nd	nd	nd	0	0.05	0	0	0	0	0.5	0	0.1	0	0	0	0.05	NN2000	9.5	MSL	midpoint	0.512348	0.512348	-0.992386
71	Beta-458896	Bondevik et al. 2019	2	Flemsoya; Longva; locality 65; Site 3 (107 x j 188 y); sample LO-87; Layer E	62.6682	6.27124	1	6320	30	0	6320	30	7222	89	56	beach gravel	0	corr	Hazelnut shell	n/a	peat	negative	nd	nd	no	by hand	nd	nd	nd	0	0.05	0	0	0	0	0.5	0	0.1	0	0	0	0.05	NN2000	9.5	MSL	midpoint	0.512348	0.512348	-0.992386
72	Beta-458897	Bondevik et al. 2019	2	Flemsoya; Longva; locality 65; Site 3 (107 x j 188 y); sample LO-88; Layer E	62.6682	6.27124	1	6450	30	0	6450	30	7384.17	41.8333	74.1667	beach gravel	0	corr	Hazelnut shell	n/a	peat	negative	nd	nd	no	by hand	nd	nd	nd	0	0.05	0	0	0	0	0.5	0	0.1	0	0	0	0.05	NN2000	9.5	MSL	midpoint	0.512348	0.512348	-0.992386
73	Beta-458898	Bondevik et al. 2019	2	Flemsoya; Longva; locality 65; Site 3 (107 x j 188 y); sample LO-89; Layer E (base)	62.6682	6.27124	1	6480	30	0	6480	30	7378.5	49.5	56.5	beach gravel	0	corr	Charcoal (Betula sp.)	n/a	peat	negative	nd	nd	no	by hand	nd	nd	nd	0	0.05	0	0	0	0	0.2	0	0.1	0	0	0	0.05	NN2000	9.3	MSL	midpoint	0.229129	0.229129	-0.992386
74	Beta-389714	Bondevik et al. 2019	2	Flemsoya; Longva; locality 65; Site 3 (107 x j 190 y); sample LO-12; Layer E (base)	62.6682	6.27124	1	6560	30	0	6560	30	7444.25	114.75	19.25	beach gravel	0	corr	Hazelnut shell	n/a	peat	negative	nd	nd	no	by hand	nd	nd	nd	0	0.05	0	0	0	0	0.2	0	0.1	0	0	0	0.05	NN2000	9.3	MSL	midpoint	0.229129	0.229129	-0.992386
75	Beta-389713	Bondevik et al. 2019	2	Flemsoya; Longva; locality 65; Site 3 (107 x j 190 y); sample LO-11; Layer E (top)	62.6682	6.27124	1	6210	30	0	6210	30	7095.5	150.5	96.5	beach gravel	0	corr	Hazelnut shell	n/a	peat	negative	nd	nd	no	by hand	nd	nd	nd	0	0.05	0	0	0	0	0.2	0	0.1	0	0	0	0.05	NN2000	9.8	MSL	midpoint	0.229129	0.229129	-0.992386
76	Beta-468571	Bondevik et al. 2019	2	Flemsoya; Longva; locality 65; Site 3 (107 x j 194 y); sample LO-97; Layer F/E (base)	62.6682	6.27124	1	6630	30	0	6630	30	7529.5	42.5	97.5	beach gravel	0	corr	Birchbark	n/a	peat	negative	nd	nd	no	by hand	nd	nd	nd	0	0.05	0	0	0	0	0.2	0	0.1	0	0	0	0.05	NN2000	9.3	MSL	midpoint	0.229129	0.229129	-0.992386
77	Beta-389715	Bondevik et al. 2019	2	Flemsoya; Longva; locality 65; Site 3 (107 x j 196 y); sample LO-13; Layer E (top)	62.6682	6.27124	1	4020	30	0	4020	30	4478.67	91.3333	61.6667	beach gravel	0	corr	Hazelnut shell	n/a	peat	negative	nd	nd	no	by hand	nd	nd	nd	0	0.05	0	0	0	0	0.2	0	0.1	0	0	0	0.05	NN2000	9.8	MSL	midpoint	0.229129	0.229129	-0.992386
78	Beta-389716	Bondevik et al. 2019	2	Flemsoya; Longva; locality 65; Site 3 (107 x j 196 y); sample LO-14; Layer E (base)	62.6682	6.27124	1	6570	30	0	6570	30	7444.25	115.75	17.25	beach gravel	0	corr	Hazelnut shell	n/a	peat	negative	nd	nd	no	by hand	nd	nd	nd	0	0.05	0	0	0	0	0.2	0	0.1	0	0	0	0.05	NN2000	9.3	MSL	midpoint	0.229129	0.229129	-0.992386
79	Beta-389717	Bondevik et al. 2019	2	Flemsoya; Longva; locality 65; Site 3 (107 x j 196 y); sample LO-15; Layer E	62.6682	6.27124	1	6540	30	0	6540	30	7443.75	116.25	82.75	beach gravel	0	corr	Charcoal (Betula sp.)	n/a	peat	negative	nd	nd	no	by hand	nd	nd	nd	0	0.05	0	0	0	0	0.5	0	0.1	0	0	0	0.05	NN2000	9.5	MSL	midpoint	0.512348	0.512348	-0.992386
80	Beta-415035	Bondevik et al. 2019	2	Flemsoya; Longva; locality 65; Site 3 (107 x j 198 y); sample LO-37; Layer E	62.6682	6.27124	1	6550	30	0	6550	30	7443.75	116.25	20.75	beach gravel	0	corr	Birchbark	n/a	peat	negative	nd	nd	no	by hand	nd	nd	nd	0	0.05	0	0	0	0	0.5	0	0.1	0	0	0	0.05	NN2000	9.5	MSL	midpoint	0.512348	0.512348	-0.992386
81	Beta-468568	Bondevik et al. 2019	2	Flemsoya; Longva; locality 65; Site 3 (107 x j 199 y); sample LO-94; Layer F	62.6682	6.27124	1	6570	30	0	6570	30	7444.25	115.75	17.25	peat	0	corr	Birchbark	beach gravel	gravel	negative	nd	nd	no	by hand	nd	nd	nd	0	0.05	0	0	0	0	0.2	0	0.1	0	0	0	0.05	NN2000	9.3	MSL	midpoint	0.229129	0.229129	-0.992386
82	Beta-389718	Bondevik et al. 2019	2	Flemsoya; Longva; locality 65; Site 3 (107 x j 201 y); sample LO-16; Layer E (top)	62.6682	6.27124	1	6330	30	0	6330	30	7224	94	58	beach gravel	0	corr	Hazelnut shell	n/a	peat	negative	nd	nd	no	by hand	nd	nd	nd	0	0.05	0	0	0	0	0.2	0	0.1	0	0	0	0.05	NN2000	9.8	MSL	midpoint	0.229129	0.229129	-0.992386
83	Beta-389719	Bondevik et al. 2019	2	Flemsoya; Longva; locality 65; Site 3 (107 x j 201 y); sample LO-17; Layer E (base)	62.6682	6.27124	1	6340	30	0	6340	30	7225.75	97.25	59.75	beach gravel	0	corr	Hazelnut shell	n/a	peat	negative	nd	nd	no	by hand	nd	nd	nd	0	0.05	0	0	0	0	0.2	0	0.1	0	0	0	0.05	NN2000	9.3	MSL	midpoint	0.229129	0.229129	-0.992386
84	Beta-468572	Bondevik et al. 2019	2	Flemsoya; Longva; locality 65; Site 3 (108 x j 192 y); sample LO-98; Layer F/E (base)	62.6682	6.27124	1	6530	30	0	6530	30	7443.25	111.75	108.25	beach gravel	0	corr	Birchbark	n/a	peat	negative	nd	nd	no	by hand	nd	nd	nd	0	0.05	0	0	0	0	0.2	0	0.1	0	0	0	0.05	NN2000	9.3	MSL	midpoint	0.229129	0.229129	-0.992386
85	Beta-468570	Bondevik et al. 2019	2	Flemsoya; Longva; locality 65; Site 3 (108 x j 194 y); sample LO-96; Layer F/E (base)	62.6682	6.27124	1	6650	30	0	6650	30	7538.33	39.6667	104.333	beach gravel	0	corr	Birchbark	n/a	peat	negative	nd	nd	no	by hand	nd	nd	nd	0	0.05	0	0	0	0	0.2	0	0.1	0	0	0	0.05	NN2000	9.3	MSL	midpoint	0.229129	0.229129	-0.992386
86	Beta-468569	Bondevik et al. 2019	2	Flemsoya; Longva; locality 65; Site 3 (108 x j 203 y); sample LO-95; Layer F	62.6682	6.27124	1	6740	30	0	6740	30	7593.5	70.5	73.5	peat	0	corr	Birchbark	n/a	peat	negative	nd	nd	no	by hand	nd	nd	nd	0	0.05	0	0	0	0	0.2	0	0.1	0	0	0	0.05	NN2000	9.3	MSL	midpoint	0.229129	0.229129	-0.992386
87	Beta-415036	Bondevik et al. 2019	2	Flemsoya; Longva; locality 65; Trench 1 (101 x j 134 y); sample LO-38; Layer E	62.6682	6.27124	1	6450	30	0	6450	30	7384.17	41.8333	74.1667	beach gravel	0	corr	Hazelnut shell	n/a	peat	negative	nd	nd	no	by hand	nd	nd	nd	0	0.05	0	0	0	0	0.5	0	0.1	0	0	0	0.05	NN2000	9.5	MSL	midpoint	0.512348	0.512348	-0.992386
88	Beta-415037	Bondevik et al. 2019	2	Flemsoya; Longva; locality 65; Trench 1 (101 x j 134 y); sample LO-39; Layer E (base)	62.6682	6.27124	1	6360	30	0	6360	30	7286.75	129.25	116.75	beach gravel	0	corr	Hazelnut shell	n/a	peat	negative	nd	nd	no	by hand	nd	nd	nd	0	0.05	0	0	0	0	0.2	0	0.1	0	0	0	0.05	NN2000	9.3	MSL	midpoint	0.229129	0.229129	-0.992386
89	Beta-458891	Bondevik et al. 2019	2	Flemsoya; Longva; locality 65; Trench 1 (101 x j 134 y); sample LO-82; Layer E (top)	62.6682	6.27124	1	4840	30	0	4840	30	5542	106	64	beach gravel	0	corr	Hazelnut shell	n/a	peat	negative	nd	nd	no	by hand	nd	nd	nd	0	0.05	0	0	0	0	0.2	0	0.1	0	0	0	0.05	NN2000	9.8	MSL	midpoint	0.229129	0.229129	-0.992386
90	Beta-458892	Bondevik et al. 2019	2	Flemsoya; Longva; locality 65; Trench 1 (101 x j 134 y); sample LO-83; Layer E	62.6682	6.27124	1	6360	30	0	6360	30	7286.75	129.25	116.75	beach gravel	0	corr	Hazelnut shell	n/a	peat	negative	nd	nd	no	by hand	nd	nd	nd	0	0.05	0	0	0	0	0.5	0	0.1	0	0	0	0.05	NN2000	9.5	MSL	midpoint	0.512348	0.512348	-0.992386
91	Beta-458887	Bondevik et al. 2019	2	Flemsoya; Longva; locality 65; Trench 1 (105 x j 135 y); sample LO-78; Layer F	62.6682	6.27124	1	6130	30	0	6130	30	7061.75	95.25	153.75	peat	0	corr	Charcoal (Betula sp.)	beach gravel	gravel	negative	nd	nd	no	by hand	nd	nd	nd	0	0.05	0	0	0	0	0.2	0	0.1	0	0	0	0.05	NN2000	9.3	MSL	midpoint	0.229129	0.229129	-0.992386
92	Beta-428840	Bondevik et al. 2019	2	Flemsoya; Longva; locality 65; Trench 1 (105 x j 135 y); sample LO-41; Layer E (base)	62.6682	6.27124	1	6730	30	0	6730	30	7590	72	73	beach gravel	0	corr	Hazelnut shell	n/a	peat	negative	nd	nd	no	by hand	nd	nd	nd	0	0.05	0	0	0	0	0.2	0	0.1	0	0	0	0.05	NN2000	9.3	MSL	midpoint	0.229129	0.229129	-0.992386
93	Beta-428839	Bondevik et al. 2019	2	Flemsoya; Longva; locality 65; Trench 1 (105 x j 135 y); sample LO-40; Layer E (top)	62.6682	6.27124	1	5680	30	0	5680	30	6439.75	112.25	41.75	beach gravel	0	corr	Charcoal (Betula sp.)	n/a	peat	negative	nd	nd	no	by hand	nd	nd	nd	0	0.05	0	0	0	0	0.2	0	0.1	0	0	0	0.05	NN2000	9.8	MSL	midpoint	0.229129	0.229129	-0.992386
94	Beta-427476	Bondevik et al. 2019	2	Flemsoya; Longva; locality 65; Trench 1 (pollen); sample K-56588; Layer F (top)	62.6682	6.27124	1	5520	30	0	5520	30	6281.5	266.5	277.5	peat	1	corr	Bulk peat	beach gravel	gravel	negative	nd	nd	no	by hand	nd	nd	nd	0	0.05	0	0	0	0	0.2	0	0.1	0	0	0	0.05	NN2000	9.3	MSL	midpoint	0.229129	0.229129	-0.992386
95	Beta-427479	Bondevik et al. 2019	2	Flemsoya; Longva; locality 65; Trench 1 (pollen); sample K-56592; Layer I (top)	62.6682	6.27124	1	6710	30	0	6710	30	7588.33	190.667	165.333	peat	1	corr	Bulk peat	beach gravel	gravel	negative	nd	nd	no	by hand	nd	nd	nd	0	0.05	0	0	0	0	0.5	0	0.1	0	0	0	0.05	NN2000	9.3	MSL	midpoint	0.512348	0.512348	-0.992386
96	Beta-446626	Bondevik et al. 2019	2	Flemsoya; Longva; locality 65; Trench 1 (pollen); sample K-56595; Layer I (middle)	62.6682	6.27124	1	7430	30	0	7430	30	8257.5	144.5	232.5	peat	1	corr	Bulk peat	beach gravel	gravel	negative	nd	nd	no	by hand	nd	nd	nd	0	0.05	0	0	0	0	0.5	0	0.1	0	0	0	0.05	NN2000	9.3	MSL	midpoint	0.512348	0.512348	-0.992386
97	Beta-427478	Bondevik et al. 2019	2	Flemsoya; Longva; locality 65; Trench 1 (pollen); sample K-56598; Layer I (base)	62.6682	6.27124	1	8290	30	0	8290	30	9262.25	219.75	243.25	peat	1	corr	Bulk peat	beach gravel	gravel	negative	nd	nd	no	by hand	nd	nd	nd	0	0.05	0	0	0	0	0.5	0	0.1	0	0	0	0.05	NN2000	9.1	MSL	midpoint	0.512348	0.512348	-0.992386
98	Beta-482271	Bondevik et al. 2019	2	Flemsoya; Longva; locality 65; Site 3 (pollen series 30); sample K-57238; Layer D (lower)	62.6682	6.27124	1	5620	30	0	5620	30	6379.5	280.5	171.5	peat	1	corr	Bulk peat	beach gravel	gravel	negative	nd	nd	no	by hand	nd	nd	nd	0	0.05	0	0	0	0	0.5	0	0.1	0	0	0	0.05	NN2000	9.5	MSL	midpoint	0.512348	0.512348	-0.992386
99	Beta-482272	Bondevik et al. 2019	2	Flemsoya; Longva; locality 65; Site 3 (pollen series 30); sample K-57339; Layer I	62.6682	6.27124	1	6210	30	0	6210	30	7152	259	353	peat	1	corr	Bulk peat	beach gravel	gravel	negative	nd	nd	no	by hand	nd	nd	nd	0	0.05	0	0	0	0	0.5	0	0.1	0	0	0	0.05	NN2000	9.3	MSL	midpoint	0.512348	0.512348	-0.992386
100	Beta-427477	Bondevik et al. 2019	2	Flemsoya; Longva; locality 65; Trench 3 (pollen); sample K-16148; Layer I (top)	62.6682	6.27124	1	6810	30	0	6810	30	7636.5	280.5	156.5	peat	1	corr	Bulk peat	beach gravel	gravel	negative	nd	nd	no	by hand	nd	nd	nd	0	0.05	0	0	0	0	0.5	0	0.1	0	0	0	0.05	NN2000	9.3	MSL	midpoint	0.512348	0.512348	-0.992386
101	Beta-428312	Bondevik et al. 2019	2	Flemsoya; Longva; locality 65; Trench 3 (pollen); sample K-16148; Layer I (top)	62.6682	6.27124	1	6930	30	0	6930	30	7780.75	163.25	196.75	peat	1	corr	Bulk peat	beach gravel	gravel	negative	nd	nd	no	by hand	nd	nd	nd	0	0.05	0	0	0	0	0.5	0	0.1	0	0	0	0.05	NN2000	9.3	MSL	midpoint	0.512348	0.512348	-0.992386
102	Beta-446625	Bondevik et al. 2019	2	Flemsoya; Longva; locality 65; Trench 3 (pollen); sample K-16158; Layer I (middle)	62.6682	6.27124	1	7720	30	0	7720	30	8532.5	441.5	202.5	peat	1	corr	Bulk peat	beach gravel	gravel	negative	nd	nd	no	by hand	nd	nd	nd	0	0.05	0	0	0	0	0.5	0	0.1	0	0	0	0.05	NN2000	9.3	MSL	midpoint	0.512348	0.512348	-0.992386
103	Beta-446624	Bondevik et al. 2019	2	Flemsoya; Longva; locality 65; Trench 3 (pollen); sample K-16166; Layer I (lower)	62.6682	6.27124	1	8430	30	0	8430	30	9404.75	149.25	369.75	peat	1	corr	Bulk peat	beach gravel	gravel	negative	nd	nd	no	by hand	nd	nd	nd	0	0.05	0	0	0	0	0.5	0	0.1	0	0	0	0.05	NN2000	9.1	MSL	midpoint	0.512348	0.512348	-0.992386
104	Beta-428313	Bondevik et al. 2019	2	Flemsoya; Longva; locality 65; Trench 3 (pollen); sample K-16170; Layer I (base)	62.6682	6.27124	1	8460	30	0	8460	30	9480	181	344	peat	1	corr	Bulk peat	beach gravel	gravel	negative	nd	nd	no	by hand	nd	nd	nd	0	0.05	0	0	0	0	0.5	0	0.1	0	0	0	0.05	NN2000	9.1	MSL	midpoint	0.512348	0.512348	-0.992386
105	Beta-427480	Bondevik et al. 2019	2	Flemsoya; Longva; locality 65; Trench 3 (pollen); sample K-16170; Layer I (base)	62.6682	6.27124	1	9230	30	0	9230	30	10389.8	289.167	171.833	peat	1	corr	Bulk peat	beach gravel	gravel	negative	nd	nd	no	by hand	nd	nd	nd	0	0.05	0	0	0	0	0.5	0	0.1	0	0	0	0.05	NN2000	9.1	MSL	midpoint	0.512348	0.512348	-0.992386
106	NOSAMS-23817a	Rickerich 2018	2	ingoya	71.0673	24.09	1	6720	30	0	6720	30	7591.5	69.5	78.5	sand and organics	0	corr	woody macrofossils	sand laminae	gyttja	positive	n/a	n/a	n/a	piston corer	nd	nd	nd	0	0.01	0	0	0	0	0.3	0.01	0.1	0	0	0	0	NN2000	6	MSL	midpoint	0.316544	0.316544	-1.2212
107	NOSAMS-23817b	Rickerich 2018	2	ingoya	71.0673	24.09	1	4620	20	0	4620	20	5373.25	71.75	66.25	gyttja	0	corr	woody macrofossils	gyttja	sandy gravel	negative	n/a	n/a	n/a	piston corer	nd	nd	nd	0	0.01	0	0	0	0	0.3	0.01	0.1	0	0	0	0	NN2000	6	MSL	midpoint	0.316544	0.316544	-1.2212
108	Tua-5647	Rasmussen et al. 2018	2	Troms; L2	69.752	19.95	1	8700	55	0	8700	55	9601.25	288.75	59.25	lacustrine gyttja	0	corr	moss stems betula pubescens	lacustrine gyttja	sandy marine deposit	negative	n/a	n/a	n/a	nd	nd	nd	nd	0	0.05	0	0	0	0	0.1	0.01	0.1	0	0	0	0.06	NN1954	19.86	MSL	midpoint	0.150333	0.150333	-1.36925
109	Tua-5646	Rasmussen et al. 2018	2	Troms; L2	69.752	19.95	1	8250	50	0	8250	50	9215	201	187	lacustrine gytja	0	corr	repanocladus sp. Betula pubescens moss stems	marine gyttja	lacustrine gyttja	positive	n/a	n/a	n/a	nd	nd	nd	nd	0	0.05	0	0	0	0	0.1	0.01	0.1	0	0	0	0.06	NN1954	19.86	MSL	midpoint	0.150333	0.150333	-1.36925
110	Ua-44731	Rasmussen et al. 2018	2	Troms; L2	69.752	19.95	1	6094	41	0	6094	41	6937.25	218.75	137.25	lacustrine gyttja	0	corr	betula sp. Twig	marine gyttja	silty gyttja	negative	n/a	n/a	n/a	nd	nd	nd	nd	0	0.05	0	0	0	0	0.1	0.01	0.1	0	0	0	0.06	NN1954	19.86	MSL	midpoint	0.150333	0.150333	-1.36925
111	Ua-44730	Rasmussen et al. 2018	2	Troms; L2	69.752	19.95	1	5929	41	0	5929	41	6723.5	156.5	60.5	gyttja	0	corr	leaf fragments of betula	gyttja	gyttja	negative	n/a	n/a	n/a	nd	nd	nd	nd	0	0.05	0	0	0	0	0.1	0.01	0.1	0	0	0	0.06	NN1954	19.86	MSL	midpoint	0.150333	0.150333	-1.36925
112	Ua-44733	Rasmussen et al. 2018	2	Troms; L4	69.7511	19.95	1	9215	57	0	9215	57	10386	168	143	laminated gyttja	0	corr	arctica islandica periostracum	coarse grained sand	marine silt	negative	n/a	n/a	n/a	nd	nd	nd	nd	0	0.05	0	0	0	0	0.1	0.01	0.1	0	0	0	0.06	NN1954	21.86	MSL	midpoint	0.150333	0.150333	-1.36935
113	Ua-44732	Rasmussen et al. 2018	2	Troms; L5	69.7578	19.97	1	8655	54	0	8655	54	9603	278	71	silty gyttja	0	corr	leaf fragments	coarse tsunami deposit	laminated marine sediment	negative	n/a	n/a	n/a	nd	nd	nd	nd	0	0.05	0	0	0	0	0.1	0.01	0.1	0	0	0	0.06	NN1954	25.96	MSL	midpoint	0.150333	0.150333	-1.36632
114	Poz-80678	Romundset et al. 2018	2	Tvedestrand; eikastjenna	58.6241	9	1	10020	60	0	10020	60	11528.6	271.375	256.625	nd	0	corr	terrestrial plant remains	nd	nd	negative	n/a	1.939	n/a	nd	nd	nd	nd	0	1	0	0	0	0	0.1	0.01	0.1	0	0	0	0.06	NN2000	85.7	MSL	midpoint	1.01	1.01	-0.172356
115	Poz-71590	Romundset et al. 2018	2	Tvedestrand; midttjenna	58.5959	8.92	1	9510	50	0	9510	50	10925.5	151.5	337.5	nd	0	corr	a few tiny twigs	nd	nd	negative	n/a	0.83	n/a	nd	nd	nd	nd	0	0.05	0	0	0	0	0.1	0.01	0.1	0	0	0	0.06	NN2000	68.2	MSL	midpoint	0.150333	0.150333	-0.171738
116	Poz-71595	Romundset et al. 2018	2	Hanto; johan_olsson-myra	58.5808	8.94	1	9470	50	0	9470	50	10657.8	410.25	85.75	nd	0	corr	Delicate terrestrial plant macrofossils	nd	nd	negative	n/a	1.062	n/a	nd	nd	nd	nd	0	0.05	0	0	0	0	0.1	0.01	0.1	0	0	0	0.06	NN2000	63.2	MSL	midpoint	0.150333	0.150333	-0.171808
117	Poz-71596	Romundset et al. 2018	2	Hanto; johan_olsson-myra	58.5808	8.94	1	9530	50	0	9530	50	10913.2	180.75	253.25	nd	0	corr	Terrestrial plant macrofossils	nd	nd	negative	n/a	1.062	n/a	nd	nd	nd	nd	0	0.05	0	0	0	0	0.1	0.01	0.1	0	0	0	0.06	NN2000	63.2	MSL	midpoint	0.150333	0.150333	-0.171808
118	Poz-72460	Romundset et al. 2018	2	Hanto; Rosstjenna	58.5542	8.87	1	9100	50	0	9100	50	10254	222	68	nd	0	corr	Moss stems	nd	nd	negative	n/a	0.773	n/a	nd	nd	nd	nd	0	1	0	0	0	0	0.1	0.01	0.1	0	0	0	0.06	NN2000	59	MSL	midpoint	1.01	1.01	-0.171037
119	Poz-72462	Romundset et al. 2018	2	Hanto; Rosstjenna	58.5542	8.87	1	9840	50	0	9840	50	11237	155	52	nd	0	corr	Mytilus edulis periostracum	nd	nd	negative	n/a	0.773	n/a	nd	nd	nd	nd	0	1	0	0	0	0	0.1	0.01	0.1	0	0	0	0.06	NN2000	59	MSL	midpoint	1.01	1.01	-0.171037
120	Poz-73672	Romundset et al. 2018	2	Tvedestrand; gladstadtjenna	58.6092	8.93	1	9590	50	0	9590	50	10967.4	194.625	220.375	nd	0	corr	Betula seeds and leaves	nd	nd	negative	n/a	0.837	n/a	nd	nd	nd	nd	0	0.05	0	0	0	0	0.1	0.01	0.1	0	0	0	0.06	NN2000	52.8	MSL	midpoint	0.150333	0.150333	-0.171935
121	Poz-72443	Romundset et al. 2018	2	Tvedestrand; oygardstjenna	58.611	8.9	1	9390	60	0	9390	60	10646	347	226	nd	0	corr	Terrestrial twigs and leaves	nd	nd	negative	n/a	1.014	n/a	nd	nd	nd	nd	0	0.05	0	0	0	0	0.1	0.01	0.1	0	0	0	0.06	NN2000	52	MSL	midpoint	0.150333	0.150333	-0.171654
122	Poz-72450	Romundset et al. 2018	2	Hanto; kroktjenna ovre	58.5579	8.88	1	9260	60	0	9260	60	10375.8	198.25	121.75	nd	0	corr	terrestrial seeds and stalks	nd	nd	negative	n/a	0.685	n/a	nd	nd	nd	nd	0	0.05	0	0	0	0	0.1	0.01	0.1	0	0	0	0.06	NN2000	46.9	MSL	midpoint	0.150333	0.150333	-0.171111
123	Poz-72457	Romundset et al. 2018	2	Hanto; kroktjenna nedre	58.5568	8.88	1	9220	50	0	9220	50	10380.5	166.5	134.5	nd	0	corr	terrestrial seeds and needles	nd	nd	negative	n/a	0.59	n/a	nd	nd	nd	nd	0	0.05	0	0	0	0	0.1	0.01	0.1	0	0	0	0.06	NN2000	46.7	MSL	midpoint	0.150333	0.150333	-0.171109
124	Poz-71602	Romundset et al. 2018	2	Tvedestrand; tranbaerlona	58.6251	8.96	1	9290	50	0	9290	50	10498.3	149.667	212.333	nd	0	corr	betula leaves seeds stalk	nd	nd	negative	n/a	0.718	n/a	nd	nd	nd	nd	0	0.05	0	0	0	0	0.1	0.01	0.1	0	0	0	0.06	NN2000	46	MSL	midpoint	0.150333	0.150333	-0.172214
125	Poz-73675	Romundset et al. 2018	2	Hanto; eikelandsmyra	58.5686	8.93	1	8620	50	0	8620	50	9595	104	102	nd	0	corr	terrestrial plant macrofossils	nd	nd	negative	n/a	0.665	n/a	nd	nd	nd	nd	0	0.05	0	0	0	0	0.1	0.01	0.1	0	0	0	0.06	NN2000	40.5	MSL	midpoint	0.150333	0.150333	-0.17163
126	Poz-73676	Romundset et al. 2018	2	Hanto; eikelandsmyra	58.5686	8.93	1	9590	50	0	9590	50	10967.4	194.625	220.375	nd	0	corr	mainly grasses and one betula seed	nd	nd	negative	n/a	0.665	n/a	nd	nd	nd	nd	0	0.05	0	0	0	0	0.1	0.01	0.1	0	0	0	0.06	NN2000	40.5	MSL	midpoint	0.150333	0.150333	-0.17163
127	Poz-72265	Romundset et al. 2018	2	Hanto; kringlemyra	58.5359	8.96	1	9010	50	0	9010	50	10205.5	41.5	287.5	nd	0	corr	seeds cortex fragment	nd	nd	negative	n/a	0.276	n/a	nd	nd	nd	nd	0	0.05	0	0	0	0	0.1	0.01	0.1	0	0	0	0.06	NN2000	37.6	MSL	midpoint	0.150333	0.150333	-0.171707
128	Poz-73618	Romundset et al. 2018	2	Hanto; Marit Bjorgen-myra	58.569	8.93	1	9030	50	0	9030	50	10213.5	61.5	290.5	nd	0	corr	pinus needle betula seeds	nd	nd	negative	n/a	0.788	n/a	nd	nd	nd	nd	0	0.05	0	0	0	0	0.1	0.01	0.1	0	0	0	0.06	NN2000	36.2	MSL	midpoint	0.150333	0.150333	-0.171633
129	Poz-80668	Romundset et al. 2018	2	Tvedestrand; eidbomyra	58.6052	8.99	1	8640	50	0	8640	50	9596	136	66	nd	0	corr	terrestrial plant seeds	nd	nd	negative	n/a	0.755	n/a	nd	nd	nd	nd	0	0.05	0	0	0	0	0.1	0.01	0.1	0	0	0	0.06	NN2000	31.7	MSL	midpoint	0.150333	0.150333	-0.172237
130	Poz-73620	Romundset et al. 2018	2	Hanto; alfstjenna	58.5749	8.91	1	8420	40	0	8420	40	9457.5	72.5	143.5	lacustrine-brackish gyttja	0	corr	terrestrial plant macrofossils	lacustrine gyttja	marine sediment	negative	n/a	0.486	n/a	nd	nd	nd	nd	0	0.05	0	0	0	0	0.1	0.01	0.1	0	0	0	0.06	NN2000	28	MSL	midpoint	0.150333	0.150333	-0.171489
131	Poz-73680	Romundset et al. 2018	2	Hanto; midttjenna lage	58.5745	8.91	1	8510	50	0	8510	50	9514.5	30.5	69.5	nd	0	corr	cortex fragments	nd	nd	negative	n/a	0.471	n/a	nd	nd	nd	nd	0	0.05	0	0	0	0	0.1	0.01	0.1	0	0	0	0.06	NN2000	27.5	MSL	midpoint	0.150333	0.150333	-0.171486
132	Poz-73679	Romundset et al. 2018	2	Hanto; midttjenna lage	58.5745	8.91	1	7920	50	0	7920	50	8776.25	206.75	176.25	nd	0	corr	Ruppia seeds	nd	nd	negative	n/a	0.471	n/a	nd	nd	nd	nd	0	0.05	0	0	0	0	0.1	0.01	0.1	0	0	0	0.06	NN2000	27.5	MSL	midpoint	0.150333	0.150333	-0.171486
133	Poz-82912	Romundset et al. 2018	2	Tvedestrand; kroktjenna	58.5671	8.94	1	6590	40	0	6590	40	7462.75	104.25	35.75	nd	0	corr	Terrestrial plant remains	nd	nd	negative	n/a	0.594	n/a	nd	nd	nd	nd	0	0.05	0	0	0	0	0.1	0.01	0.1	0	0	0	0.06	NN2000	24.4	MSL	midpoint	0.150333	0.150333	-0.171707
134	Poz-71613	Romundset et al. 2018	2	Hanto; revstjenna	58.5799	8.91	1	6240	40	0	6240	40	7159.5	97.5	149.5	nd	0	corr	twig with intact thin cortex	nd	nd	negative	n/a	0.616	n/a	nd	nd	nd	nd	0	0.05	0	0	0	0	0.1	0.01	0.1	0	0	0	0.06	NN2000	21.6	MSL	midpoint	0.150333	0.150333	-0.171525
135	Poz-72261	Romundset et al. 2018	2	Hanto; revstjenna	58.5533	8.91	1	5255	35	0	5255	35	6052	126	123	nd	0	corr	Twig	nd	nd	negative	n/a	0.396	n/a	nd	nd	nd	nd	0	0.05	0	0	0	0	0.1	0.01	0.1	0	0	0	0.06	NN2000	18.5	MSL	midpoint	0.150333	0.150333	-0.171372
136	Poz-71535	Romundset et al. 2018	2	Tvedestrand; eidbotjenna	58.606	8.98	1	3720	35	0	3720	35	4078.33	141.667	146.333	nd	0	corr	terrestrial plant macrofossils	nd	nd	negative	n/a	0.465	n/a	nd	nd	nd	nd	0	0.05	0	0	0	0	0.1	0.01	0.1	0	0	0	0.06	NN2000	11.5	MSL	midpoint	0.150333	0.150333	-0.172191
137	Poz-71605	Romundset et al. 2018	2	Tvedestrand; oygardstjenna	58.5913	9.02	1	2440	30	0	2440	30	2526	173	169	nd	0	corr	Leaves and stalks	nd	nd	negative	n/a	0.362	n/a	nd	nd	nd	nd	0	0.05	0	0	0	0	0.1	0.01	0.1	0	0	0	0.06	NN2000	7.2	MSL	midpoint	0.150333	0.150333	-0.172303
138	Beta-461937	Johnsen et al. 2017	2	Gunnarstadvatnet	59.217	5.41	1	14100	70	0	12180	40	14075.5	221.5	194.5	gyttja silt	0	corr	salix polaris	silty gyttja	silt	negative	n/a	nd	n/a	russian corer	nd	nd	nd	0	0.1	0	0	0	0	0.1	0.01	0.1	0	0	0	0.06	NN2000	17.44	MSL	midpoint	0.173494	0.173494	-0.342434
139	Beta-439744	Johnsen et al. 2017	2	Gunnarstadvatnet	59.217	5.41	1	12064	48	0	10550	30	12565.2	113.75	82.25	silty gyttja	0	corr	leaf fragments	silt	gyttja silt	positive	n/a	nd	n/a	russian corer	nd	nd	nd	0	0.1	0	0	0	0	0.1	0.01	0.1	0	0	0	0.06	NN2000	17.44	MSL	midpoint	0.173494	0.173494	-0.342434
140	Poz-86475	Johnsen et al. 2017	2	Gunnarstadvatnet	59.217	5.41	1	11330	100	0	9890	60	11332.2	274.75	135.25	gyttja silt	0	corr	Polytrychum moss	silt	gyttja	negative	0.2655	nd	n/a	russian corer	nd	nd	nd	0	0.1	0	0	0	0	0.1	0.01	0.1	0	0	0	0.06	NN2000	17.44	MSL	midpoint	0.173494	0.173494	-0.342434
141	Poz-86485	Johnsen et al. 2017	2	Boknamyr	59.2146	5.39	1	13780	100	0	11940	60	13865	158	256	silt	0	corr	aquatic moss	silty gyttja	silt	negative	n/a	nd	n/a	russian corer	nd	nd	nd	0	0.1	0	0	0	0	0.1	0.01	0.1	0	0	0	0.06	NN2000	11.71	MSL	midpoint	0.173494	0.173494	-0.333942
142	Poz-86484	Johnsen et al. 2017	2	Boknamyr	59.2146	5.39	1	13150	50	0	11290	50	13173.3	123.667	73.3333	silty gyttja	0	corr	leaf fragments	silt	silt	positive	n/a	nd	n/a	russian corer	nd	nd	nd	0	0.1	0	0	0	0	0.1	0.01	0.1	0	0	0	0.06	NN2000	11.71	MSL	midpoint	0.173494	0.173494	-0.333942
143	Poz-86477	Johnsen et al. 2017	2	Boknamyr	59.2146	5.39	1	11380	110	0	9940	50	11345.2	335.75	106.25	gyttja silt	0	corr	leaf fragments	gyttja silt	silt	negative	n/a	nd	n/a	russian corer	nd	nd	nd	0	0.1	0	0	0	0	0.1	0.01	0.1	0	0	0	0.06	NN2000	11.71	MSL	midpoint	0.173494	0.173494	-0.333942
144	LuS-5950	Mangerud et al. 2016	2	Halsnoy; Kjekamyra; core 505-137	59.739	5.749	1	12405	70	marine	12405	70	13326	550	255	glaciomarine silt	2	corr	Fragments of Mytilus edulis	gyttja silt	nd	negative	5.575	nd	no	piston corer	n/a	n/a	n/a	0	0.1	0	0	0	0	0.2	0	0.1	0	0	0	0	nd	47	MSL	mdipoint	0.244949	0.244949	-0.321696
145	LuS-5949	Mangerud et al. 2016	2	Halsnoy; Kjekamyra; core 505-50-02	59.739	5.749	1	11990	70	marine	11990	70	13158.5	215.5	208.5	silty gyttja	2	corr	Fragments of Mytilus edulis	gyttja silt	nd	negative	8.12	nd	no	piston corer	n/a	n/a	n/a	0	0.1	0	0	0	0	0.2	0	0.1	0	0	0	0	nd	47	MSL	mdipoint	0.244949	0.244949	-0.321696
146	LuS-5948	Mangerud et al. 2016	2	Halsnoy; Kjekamyra; core 505-50-02	59.739	5.749	1	11485	80	marine	11485	80	12679.5	205.5	202.5	silty gyttja	2	corr	Fragments of Mytilus edulis	gyttja silt	nd	negative	7.78	nd	no	piston corer	n/a	n/a	n/a	0	0.1	0	0	0	0	0.2	0	0.1	0	0	0	0	nd	47	MSL	mdipoint	0.244949	0.244949	-0.321696
147	LuS-5946	Mangerud et al. 2016	2	Halsnoy; Kjekamyra; core 505-50-02	59.739	5.749	1	11195	160	0	11195	160	13153.5	241.5	391.5	gyttja silt	0	corr	Leaf fragments (Salix herbacea, S. polaris) Twig. Bud scale	silty sand	silty gyttja	negative	7.545	nd	no	piston corer	n/a	n/a	n/a	0	0.1	0	0	0	0	0.2	0	0.1	0	0	0	0	nd	47	MSL	mdipoint	0.244949	0.244949	-0.321696
148	LuS-5945	Mangerud et al. 2016	2	Halsnoy; Kjekamyra; core 505-50-02	59.739	5.749	1	10750	70	0	10750	70	12730	94	108	gyttja silt	0	corr	Leaf fragments. Mosses (Polytricum)	silty sand	silty gyttja	negative	7.48	nd	no	piston corer	n/a	n/a	n/a	0	0.1	0	0	0	0	0.2	0	0.1	0	0	0	0	nd	47	MSL	mdipoint	0.244949	0.244949	-0.321696
149	LuS-5944	Mangerud et al. 2016	2	Halsnoy; Kjekamyra; core 505-50-02	59.739	5.749	1	10645	100	0	10645	100	12672	144	479	gyttja silt	0	corr	Leaf fragments (Salix herbacea) Mosses (Polytricum, Racomitrium)	silty sand	silty gyttja	negative	7.425	nd	no	piston corer	n/a	n/a	n/a	0	0.1	0	0	0	0	0.2	0	0.1	0	0	0	0	nd	47	MSL	mdipoint	0.244949	0.244949	-0.321696
150	LuS-5943	Mangerud et al. 2016	2	Halsnoy; Kjekamyra; core 505-50-02	59.739	5.749	1	10560	60	0	10560	60	12595.8	125.167	314.833	gyttja silt	0	corr	Leaf fragments (Salix herbacea) Mosses	silty sand	silty gyttja	negative	7.295	nd	no	piston corer	n/a	n/a	n/a	0	0.1	0	0	0	0	0.2	0	0.1	0	0	0	0	nd	47	MSL	mdipoint	0.244949	0.244949	-0.321696
151	LuS-5941	Mangerud et al. 2016	2	Halsnoy; Kjekamyra; core 505-50-01	59.739	5.749	1	9865	70	0	9865	70	11276.5	332.5	101.5	silty sand	0	corr	Mosses (Racomitrium). Leaf ragments. Catcin scale.	sandy silt	gyttja silt	negative	5.43	nd	no	piston corer	n/a	n/a	n/a	0	0.1	0	0	0	0	0.2	0	0.1	0	0	0	0	nd	47	MSL	mdipoint	0.244949	0.244949	-0.321696
152	LuS-5940	Mangerud et al. 2016	2	Halsnoy; Kjekamyra; core 505-50-01	59.739	5.749	1	10120	60	0	10120	60	11679.8	254.167	277.833	silty sand	0	corr	Mosses (Racomitrium).	sandy silt	gyttja silt	negative	5.4	nd	no	piston corer	n/a	n/a	n/a	0	0.1	0	0	0	0	0.2	0	0.1	0	0	0	0	nd	47	MSL	mdipoint	0.244949	0.244949	-0.321696
153	LuS-5939	Mangerud et al. 2016	2	Halsnoy; Kjekamyra; core 505-50-01	59.739	5.749	1	9905	100	0	9905	100	11384.5	364.5	210.5	sandy silt	0	corr	Twig. Fruit (Betula). Catkin scale	gyttja	silty sand	negative	5.195	nd	no	piston corer	n/a	n/a	n/a	0	0.1	0	0	0	0	0.2	0	0.1	0	0	0	0	nd	47	MSL	mdipoint	0.244949	0.244949	-0.321696
154	LuS-5938	Mangerud et al. 2016	2	Halsnoy; Kjekamyra; core 505-50-01	59.739	5.749	1	9950	400	0	9950	400	11212.8	1487.25	791.75	gyttja	0	corr	Mosses (Polytricum, Racomitrium). Leaf fragments.	nd	sandy silt	negative	5.055	nd	no	piston corer	n/a	n/a	n/a	0	0.1	0	0	0	0	0.2	0	0.1	0	0	0	0	nd	47	MSL	mdipoint	0.244949	0.244949	-0.321696
155	LuS-5937	Mangerud et al. 2016	2	Halsnoy; Kjekamyra; core 505-50-01	59.739	5.749	1	9520	60	0	9520	60	10910.1	187.875	319.125	gyttja	0	corr	Twig. Fruit (Betula). Catkin scale. Mosses (Racomitrium)	nd	sandy silt	negative	4.975	nd	no	piston corer	n/a	n/a	n/a	0	0.1	0	0	0	0	0.2	0	0.1	0	0	0	0	nd	47	MSL	mdipoint	0.244949	0.244949	-0.321696
156	Poz-52955	Romundset et al. 2015	2	Lista; skjolnesmyra	58.0775	6.82	1	3610	50	0	3610	50	3931	154	203	laminated gyttja	0	corr	drepanocladus moss stalks	organic mud	lake gyttja	negative	n/a	nd	n/a	russian corer	nd	nd	nd	0	0.5	0	0	0	0	0.1	0.01	0.1	0	0	0	0.06	NN2000	3.4	MSL	midpoint	0.519711	0.519711	-0.109491
157	Poz-52936	Romundset et al. 2015	2	Lista; skjolnesmyra	58.0775	6.82	1	7390	50	0	7390	50	8239.25	100.75	202.25	laminated gyttja	0	corr	moss stalks. with leaves probably drepanocladus	lake gyttja	organic mud	positive	n/a	nd	n/a	russian corer	nd	nd	nd	0	0.5	0	0	0	0	0.1	0.01	0.1	0	0	0	0.06	NN2000	3.4	MSL	midpoint	0.519711	0.519711	-0.109491
158	Ua-44699	Romundset et al. 2015	2	Lista; bekkeviktjonna	58.096	6.84	1	5202	45	0	5202	45	5955.75	220.25	60.75	laminated gyttja	0	corr	Twig of Betula or salix	lake gyttja	organic mud	positive	n/a	nd	n/a	russian corer	nd	nd	nd	0	0.5	0	0	0	0	0.1	0.01	0.1	0	0	0	0.06	NN2000	4.6	MSL	midpoint	0.519711	0.519711	-0.110308
159	Ua-44703	Romundset et al. 2015	2	Lista; bekkeviktjonna	58.096	6.84	1	6681	41	0	6681	41	7548.25	102.75	114.25	laminated gyttja	0	corr	wood fragment	organic mud	lake gyttja	negative	n/a	nd	n/a	russian corer	nd	nd	nd	0	0.5	0	0	0	0	0.1	0.01	0.1	0	0	0	0.06	NN2000	4.6	MSL	midpoint	0.519711	0.519711	-0.110308
160	Ua-44693	Romundset et al. 2015	2	Lista; liantjonna	58.0848	6.96	1	3179	55	0	3179	55	3412.75	135.25	170.75	lake gyttja	0	corr	Betula seed leaf fragments catkin scale twig	lake gyttja	organic mud	negative	n/a	nd	n/a	russian corer	nd	nd	nd	0	0.5	0	0	0	0	0.1	0.01	0.1	0	0	0	0.06	NN2000	2.1	MSL	midpoint	0.519711	0.519711	-0.115064
161	Tra-3075	Romundset et al. 2015	2	Lista; austadtjonna	58.0922	7.04	1	7810	45	0	7810	45	8600	121	153	laminated gyttja	0	corr	Terrestrial plant remains	lake gyttja	organic mud and silt	positive	n/a	nd	n/a	russian corer	nd	nd	nd	0	1	0	0	0	0	0.1	0.01	0.1	0	0	0	0.06	NN2000	1	MSL	midpoint	1.01	1.01	-0.118967
162	Tra-3074	Romundset et al. 2015	2	Lista; austadtjonna	58.0922	7.04	1	1545	30	0	1545	30	1455.17	60.8333	98.1667	laminated gyttja	0	corr	Terrestrial plant remains	organic mud	lake gyttja	negative	n/a	nd	n/a	russian corer	nd	nd	nd	0	0.5	0	0	0	0	0.1	0.01	0.1	0	0	0	0.06	NN2000	1	MSL	midpoint	0.519711	0.519711	-0.118967
163	Tra-3082	Romundset et al. 2015	2	Lista; ulvasmyra	58.0163	7.01	1	1785	30	0	1785	30	1674	65	84	laminated gyttja	0	corr	Ruppia fruits	organic mud	lake gyttja	negative	n/a	nd	n/a	russian corer	nd	nd	nd	0	0.5	0	0	0	0	0.1	0.01	0.1	0	0	0	0.06	NN2000	0.7	MSL	midpoint	0.519711	0.519711	-0.11868
164	Tra-3083	Romundset et al. 2015	2	Lista; ulvasmyra	58.0163	7.01	1	1735	30	0	1785	30	1674	65	84	laminated gyttja	0	corr	Potamogeton endocarps	organic mud	lake gyttja	negative	n/a	nd	n/a	russian corer	nd	nd	nd	0	0.5	0	0	0	0	0.1	0.01	0.1	0	0	0	0.06	NN2000	0.7	MSL	midpoint	0.519711	0.519711	-0.11868
165	Ua-44692	Romundset et al. 2015	2	Lista; auneviktjonna	58.1193	6.96922	1	9793	67	0	9790	67	11216.5	176.5	338.5	lake gyttja	0	corr	Potamogeton stems betula sp seeds	lake gyttja	organic mud	negative	n/a	nd	n/a	russian corer	nd	nd	nd	0	0.5	0	0	0	0	0.1	0.01	0.1	0	0	0	0.06	NN2000	9	MSL	midpoint	0.519711	0.519711	-0.114464
166	Barn15_01	Barnett et al. 2015	2	Storosen (core T3/15m)	68.3467	15.69	9	n/a	n/a	0	n/a	n/a	-61	1	1	Dark brown, organic rich, salt-marsh peat	0	corr	Testates	n/a	Mid-brown, organic rich sand silt with some clay. Occasional medium to coarse pebbles throughout	negative	0.003	1.097	0	nd	nd	nd	nd	0	0.05	0	0	0	0	0.1	0.01	0.1	0	0	0	0.06	NN2000	1.468	MSL	midpoint	0.150333	0.150333	-1.38642
167	Barn15_02	Barnett et al. 2015	2	Storosen (core T3/15m)	68.3467	15.69	9	n/a	n/a	0	n/a	n/a	-58	1	1	Dark brown, organic rich, salt-marsh peat	0	corr	Testates	n/a	Mid-brown, organic rich sand silt with some clay. Occasional medium to coarse pebbles throughout	negative	0.008	1.092	0	nd	nd	nd	nd	0	0.05	0	0	0	0	0.1	0.01	0.1	0	0	0	0.06	NN2000	1.463	MSL	midpoint	0.150333	0.150333	-1.38642
168	Barn15_03	Barnett et al. 2015	2	Storosen (core T3/15m)	68.3467	15.69	9	n/a	n/a	0	n/a	n/a	-51	1	1	Dark brown, organic rich, salt-marsh peat	0	corr	Testates	n/a	Mid-brown, organic rich sand silt with some clay. Occasional medium to coarse pebbles throughout	negative	0.018	1.082	0	nd	nd	nd	nd	0	0.05	0	0	0	0	0.1	0.01	0.1	0	0	0	0.06	NN2000	1.453	MSL	midpoint	0.150333	0.150333	-1.38642
169	Barn15_04	Barnett et al. 2015	2	Storosen (core T3/15m)	68.3467	15.69	9	n/a	n/a	0	n/a	n/a	-44	1	1	Dark brown, organic rich, salt-marsh peat	0	corr	Testates	n/a	Mid-brown, organic rich sand silt with some clay. Occasional medium to coarse pebbles throughout	negative	0.028	1.072	0	nd	nd	nd	nd	0	0.05	0	0	0	0	0.1	0.01	0.1	0	0	0	0.06	NN2000	1.443	MSL	midpoint	0.150333	0.150333	-1.38642
170	Barn15_05	Barnett et al. 2015	2	Storosen (core T3/15m)	68.3467	15.69	9	n/a	n/a	0	n/a	n/a	-35	3	3	Dark brown, organic rich, salt-marsh peat	0	corr	Testates	n/a	Mid-brown, organic rich sand silt with some clay. Occasional medium to coarse pebbles throughout	negative	0.038	1.062	0	nd	nd	nd	nd	0	0.05	0	0	0	0	0.1	0.01	0.1	0	0	0	0.06	NN2000	1.433	MSL	midpoint	0.150333	0.150333	-1.38642
171	Barn15_06	Barnett et al. 2015	2	Storosen (core T3/15m)	68.3467	15.69	9	n/a	n/a	0	n/a	n/a	-27	4	4	Dark brown, organic rich, salt-marsh peat	0	corr	Testates	n/a	Mid-brown, organic rich sand silt with some clay. Occasional medium to coarse pebbles throughout	negative	0.048	1.052	0	nd	nd	nd	nd	0	0.05	0	0	0	0	0.1	0.01	0.1	0	0	0	0.06	NN2000	1.423	MSL	midpoint	0.150333	0.150333	-1.38642
172	Barn15_07	Barnett et al. 2015	2	Storosen (core T3/15m)	68.3467	15.69	9	n/a	n/a	0	n/a	n/a	-17	5	5	Dark brown, organic rich, salt-marsh peat	0	corr	Testates	n/a	Mid-brown, organic rich sand silt with some clay. Occasional medium to coarse pebbles throughout	negative	0.058	1.042	0	nd	nd	nd	nd	0	0.05	0	0	0	0	0.1	0.01	0.1	0	0	0	0.06	NN2000	1.413	MSL	midpoint	0.150333	0.150333	-1.38642
173	Barn15_08	Barnett et al. 2015	2	Storosen (core T3/15m)	68.3467	15.69	9	n/a	n/a	0	n/a	n/a	12	13	13	Mid-brown, organic rich sand silt with some clay. Occasional medium to coarse pebbles throughout	0	corr	Testates	Dark brown, organic rich, salt-marsh peat	Mid-brown to grey clayey silty sand with some organics. Occasional gravel to small pebbles throughout	negative	0.078	1.022	0	nd	nd	nd	nd	0	0.05	0	0	0	0	0.1	0.01	0.1	0	0	0	0.06	NN2000	1.393	MSL	midpoint	0.150333	0.150333	-1.38642
174	Barn15_09	Barnett et al. 2015	2	Svinoyosen (core T3/0m)	68.3206	15.58	9	n/a	n/a	0	n/a	n/a	-14	6	6	Mid-brown, organic rich sand silt with some clay. Occasional medium to coarse pebbles throughout	0	corr	foraminifera (non TF)	Dark brown, organic rich, salt-marsh peat	Mid-brown to grey clayey silty sand with some organics. Occasional gravel to small pebbles throughout	negative	0.083	1.017	0	nd	nd	nd	nd	0	0.05	0	0	0	0	0.1	0.01	0.1	0	0	0	0.06	NN2000	1.288	MSL	midpoint	0.150333	0.150333	-1.2
175	Barn15_10	Barnett et al. 2015	2	Svinoyosen (core T3/0m)	68.3206	15.58	9	n/a	n/a	0	n/a	n/a	-5	8	8	Mid-brown, organic rich sand silt with some clay. Occasional medium to coarse pebbles throughout	0	corr	foraminifera (non TF)	Dark brown, organic rich, salt-marsh peat	Mid-brown to grey clayey silty sand with some organics. Occasional gravel to small pebbles throughout	negative	0.088	1.012	0	nd	nd	nd	nd	0	0.05	0	0	0	0	0.1	0.01	0.1	0	0	0	0.06	NN2000	1.283	MSL	midpoint	0.150333	0.150333	-1.2
176	Barn15_11	Barnett et al. 2015	2	Svinoyosen (core T3/0m)	68.3206	15.58	9	n/a	n/a	0	n/a	n/a	13	15	15	Mid-brown, organic rich sand silt with some clay. Occasional medium to coarse pebbles throughout	0	corr	foraminifera (non TF)	Dark brown, organic rich, salt-marsh peat	Mid-brown to grey clayey silty sand with some organics. Occasional gravel to small pebbles throughout	negative	0.098	1.002	0	nd	nd	nd	nd	0	0.05	0	0	0	0	0.1	0.01	0.1	0	0	0	0.06	NN2000	1.273	MSL	midpoint	0.150333	0.150333	-1.2
177	Barn15_12	Barnett et al. 2015	2	Svinoyosen (core T3/0m)	68.3206	15.58	9	n/a	n/a	0	n/a	n/a	42	35	35	Mid-brown, organic rich sand silt with some clay. Occasional medium to coarse pebbles throughout	0	corr	foraminifera (non TF)	Dark brown, organic rich, salt-marsh peat	Mid-brown to grey clayey silty sand with some organics. Occasional gravel to small pebbles throughout	negative	0.108	0.992	0	nd	nd	nd	nd	0	0.05	0	0	0	0	0.1	0.01	0.1	0	0	0	0.06	NN2000	1.263	MSL	midpoint	0.150333	0.150333	-1.2
178	Barn15_13	Barnett et al. 2015	2	Svinoyosen (core T3/0m)	68.3206	15.58	9	n/a	n/a	0	n/a	n/a	150	50	50	Mid-brown, organic rich sand silt with some clay. Occasional medium to coarse pebbles throughout	0	corr	foraminifera (non TF)	Dark brown, organic rich, salt-marsh peat	Mid-brown to grey clayey silty sand with some organics. Occasional gravel to small pebbles throughout	negative	0.168	0.932	0	nd	nd	nd	nd	0	0.05	0	0	0	0	0.1	0.01	0.1	0	0	0	0.06	NN2000	1.203	MSL	midpoint	0.150333	0.150333	-1.2
179	Barn15_14	Barnett et al. 2015	2	Svinoyosen (core T3/0m)	68.3206	15.58	9	n/a	n/a	0	n/a	n/a	575	125	125	Mid-brown to grey clayey silty sand with some organics. Occasional gravel to small pebbles throughout	1	corr	Sediment	Mid-brown, organic rich sand silt with some clay. Occasional medium to coarse pebbles throughout	Dull grey sandy silt with some clay and rare organics. No marine shells or shell fragments present	negative	0.208	0.892	0	nd	nd	nd	nd	0	0.05	0	0	0	0	0.1	0.01	0.1	0	0	0	0.06	NN2000	1.163	MSL	midpoint	0.150333	0.150333	-1.2
180	Barn15_15	Barnett et al. 2015	2	Svinoyosen (core T3/0m)	68.3206	15.58	9	n/a	n/a	0	n/a	n/a	750	100	100	Mid-brown to grey clayey silty sand with some organics. Occasional gravel to small pebbles throughout	1	corr	Sediment	Mid-brown, organic rich sand silt with some clay. Occasional medium to coarse pebbles throughout	Dull grey sandy silt with some clay and rare organics. No marine shells or shell fragments present	negative	0.233	0.867	0	nd	nd	nd	nd	0	0.05	0	0	0	0	0.1	0.01	0.1	0	0	0	0.06	NN2000	1.138	MSL	midpoint	0.150333	0.150333	-1.2
181	Barn15_16	Barnett et al. 2015	2	Svinoyosen (core T3/0m)	68.3206	15.58	9	n/a	n/a	0	n/a	n/a	1075	125	125	Mid-brown to grey clayey silty sand with some organics. Occasional gravel to small pebbles throughout	1	corr	Sediment	Mid-brown, organic rich sand silt with some clay. Occasional medium to coarse pebbles throughout	Dull grey sandy silt with some clay and rare organics. No marine shells or shell fragments present	negative	0.258	0.842	0	nd	nd	nd	nd	0	0.05	0	0	0	0	0.1	0.01	0.1	0	0	0	0.06	NN2000	1.113	MSL	midpoint	0.150333	0.150333	-1.2
182	Barn15_17	Barnett et al. 2015	2	Svinoyosen (core T3/0m)	68.3206	15.58	9	n/a	n/a	0	n/a	n/a	1750	200	200	Dull grey sandy silt with some clay and rare organics. No marine shells or shell fragments present	1	corr	Sediment	Mid-brown to grey clayey silty sand with some organics. Occasional gravel to small pebbles throughout	Dull grey clayey silt, some sand and occasional marine shells or shell fragments. Coarse (40 mm), subangular pebbles at the unconformable lower contact	negative	0.275	0.825	0	nd	nd	nd	nd	0	0.05	0	0	0	0	0.1	0.01	0.1	0	0	0	0.06	NN2000	1.095	MSL	midpoint	0.150333	0.150333	-1.2
183	SUERC-39977	Barnett et al. 2015	2	Svinoyosen (core T3/0m)	68.3206	15.58	1	2140	37	0	2140	37	2159.33	141.667	160.333	Dull grey sandy silt with some clay and rare organics. No marine shells or shell fragments present	0	corr	betula bark	Mid-brown to grey clayey silty sand with some organics. Occasional gravel to small pebbles throughout	Dull grey clayey silt, some sand and occasional marine shells or shell fragments. Coarse (40 mm), subangular pebbles at the unconformable lower contact	negative	0.373	0.727	0	nd	nd	nd	nd	0	0.05	0	0	0	0	0.1	0.01	0.1	0	0	0	0.06	NN2000	0.998	MSL	midpoint	0.150333	0.150333	-1.2
184	SUERC-39980	Barnett et al. 2015	2	Svinoyosen (core T3/0m)	68.3206	15.58	1	2279	35	0	2279	35	2243.83	105.167	86.8333	Dull grey sandy silt with some clay and rare organics. No marine shells or shell fragments present	0	corr	wood piece	Mid-brown to grey clayey silty sand with some organics. Occasional gravel to small pebbles throughout	Dull grey clayey silt, some sand and occasional marine shells or shell fragments. Coarse (40 mm), subangular pebbles at the unconformable lower contact	negative	0.393	0.707	0	nd	nd	nd	nd	0	0.05	0	0	0	0	0.1	0.01	0.1	0	0	0	0.06	NN2000	0.978	MSL	midpoint	0.150333	0.150333	-1.2
185	SUERC-39981	Barnett et al. 2015	2	Svinoyosen (core T3/0m)	68.3206	15.58	1	2634	35	0	2634	35	2750.5	94.5	28.5	Dull grey clayey silt, some sand and occasional marine shells or shell fragments. Coarse (40 mm), subangular pebbles at the unconformable lower contact	0	corr	charcoal	Dull grey sandy silt with some clay and rare organics. No marine shells or shell fragments present		negative	0.468	0.632	0	nd	nd	nd	nd	0	0.05	0	0	0	0	0.1	0.01	0.1	0	0	0	0.06	NN2000	0.903	MSL	midpoint	0.150333	0.150333	-1.2
186	SUERC-34686	Barnett et al. 2015	2	Svinoyosen (core T3/0m)	68.3206	15.58	1	2437	37	0	2437	37	2524.5	176.5	169.5	Dull grey clayey silt, some sand and occasional marine shells or shell fragments. Coarse (40 mm), subangular pebbles at the unconformable lower contact	0	corr	betula fragments	Dull grey sandy silt with some clay and rare organics. No marine shells or shell fragments present	Light beige, wet, unconsolidated sandy shell hash. Abundant marine shells and shell fragments. Unconformable upper contact	negative	0.493	0.607	0	nd	nd	nd	nd	0	0.05	0	0	0	0	0.1	0.01	0.1	0	0	0	0.06	NN2000	0.878	MSL	midpoint	0.150333	0.150333	-1.2
187	SUERC-39987	Barnett et al. 2015	2	Svinoyosen (core T3/0m)	68.3206	15.58	1	2777	36	0	2777	36	2861.83	95.1667	80.8333	Dull grey clayey silt, some sand and occasional marine shells or shell fragments. Coarse (40 mm), subangular pebbles at the unconformable lower contact	0	corr	littorina saxatilis	Dull grey sandy silt with some clay and rare organics. No marine shells or shell fragments present	Light beige, wet, unconsolidated sandy shell hash. Abundant marine shells and shell fragments. Unconformable upper contact	negative	0.538	0.562	0	nd	nd	nd	nd	0	0.05	0	0	0	0	0.1	0.01	0.1	0	0	0	0.06	NN2000	0.883	MSL	midpoint	0.150333	0.150333	-1.2
188	SUERC-41146	Barnett et al. 2015	2	Svinoyosen (core T3/0m)	68.3206	15.58	1	3020	35	0	3020	35	3258.5	85.5	181.5	Dull grey clayey silt, some sand and occasional marine shells or shell fragments. Coarse (40 mm), subangular pebbles at the unconformable lower contact	0	corr	plant fragments	Dull grey sandy silt with some clay and rare organics. No marine shells or shell fragments present	Light beige, wet, unconsolidated sandy shell hash. Abundant marine shells and shell fragments. Unconformable upper contact	negative	0.85	0.25	0	nd	nd	nd	nd	0	0.05	0	0	0	0	0.1	0.01	0.1	0	0	0	0.06	NN2000	0.52	MSL	midpoint	0.150333	0.150333	-1.2
189	UBA-21511	Sorenson et al. 2014	2	Vestfold; Breimyr (lok. 1)	59.0619	10.057	1	8590	45	0	8590	45	9575.5	535.5	264.5	nd	1	corr	gyttja	terrestrial gyttja	marine gyttja	negative	0.85	0.25	0	nd	nd	nd	nd	0	0.05	0	0	0	0	0.2	0.01	0.1	0	0	0	0.06	NN2000	54.9	MSL	midpoint	0.229347	0.229347	-0.174742
190	TRa-3004A	Sorenson et al. 2014	2	Vestfold; Nordbytjern (lok. 2)	59.0591	10.0618	1	8075	60	0	8075	60	8960.21	434.786	359.214	nd	1	corr	gyttja	terrestrial gyttja	marine gyttja	negative	0.85	0.25	0	nd	nd	nd	nd	0	0.05	0	0	0	0	0.2	0.01	0.1	0	0	0	0.06	NN2000	48.3	MSL	midpoint	0.229347	0.229347	-0.174762
191	Beta-301230	Sorenson et al. 2014	2	Vestfold; Gunnarsrødmyr (lok. 3)	59.0999	9.81239	1	6560	40	0	6560	40	7509.25	144.75	248.25	nd	1	corr	gyttja	terrestrial gyttja	marine gyttja	negative	0.85	0.25	0	nd	nd	nd	nd	0	0.05	0	0	0	0	0.2	0.01	0.1	0	0	0	0.06	NN2000	43.2	MSL	midpoint	0.229347	0.229347	-0.174107
192	UBA-19961	Sorenson et al. 2014	2	Vestfold; Halvarptjern (lok. 4)	59.0708	9.8104	1	6090	30	0	6090	30	6960.17	288.833	282.167	nd	1	corr	gyttja	terrestrial gyttja	marine gyttja	negative	0.85	0.25	0	nd	nd	nd	nd	0	0.05	0	0	0	0	0.2	0.01	0.1	0	0	0	0.06	NN2000	35.9	MSL	midpoint	0.229347	0.229347	-0.174102
193	UBA-19962	Sorenson et al. 2014	2	Vestfold; Napperødtjern (lok. 5)	59.1805	10.1735	1	5485	35	0	5485	35	6308.88	178.125	308.875	nd	1	corr	gyttja	terrestrial gyttja	marine gyttja	negative	0.85	0.25	0	nd	nd	nd	nd	0	0.05	0	0	0	0	0.2	0.01	0.1	0	0	0	0.06	NN2000	26.6	MSL	midpoint	0.229347	0.229347	-0.176096
194	TRa-3002A	Sorenson et al. 2014	2	Vestfold; Vittersøtjern (lok. 6)	59.058	10.1337	1	5200	40	0	5200	40	6066	207	401	nd	1	corr	gyttja	terrestrial gyttja	marine gyttja	negative	0.85	0.25	0	nd	nd	nd	nd	0	0.05	0	0	0	0	0.2	0.01	0.1	0	0	0	0.06	NN2000	27.1	MSL	midpoint	0.229347	0.229347	-0.175196
195	TRa-3445A	Sorenson et al. 2014	2	Vestfold; Bekketjernmyr (lok. 7)*	59.2808	10.467	1	4260	50	0	4260	50	4784.42	491.583	338.417	nd	1	corr	gyttja	terrestrial gyttja	marine gyttja	negative	0.85	0.25	0	nd	nd	nd	nd	0	0.05	0	0	0	0	0.2	0.01	0.1	0	0	0	0.06	NN2000	19.5	MSL	midpoint	0.229347	0.229347	-0.185986
196	UBA-20321	Sorenson et al. 2014	2	Vestfold; Børsesjø (lok. 8)	59.2289	9.62037	1	3815	30	0	3815	30	4222.67	292.333	314.667	nd	1	corr	gyttja	terrestrial gyttja	marine gyttja	negative	0.85	0.25	0	nd	nd	nd	nd	0	0.05	0	0	0	0	0.2	0.01	0.1	0	0	0	0.06	NN2000	15.3	MSL	midpoint	0.229347	0.229347	-0.174081
197	TRa-3007A	Sorenson et al. 2014	2	Vestfold; Tjønna, Sundene (lok. 9)	59.1591	10.3974	1	2910	30	0	2910	30	3072.75	269.25	286.75	nd	1	corr	gyttja	terrestrial gyttja	marine gyttja	negative	0.85	0.25	0	nd	nd	nd	nd	0	0.05	0	0	0	0	0.2	0.01	0.1	0	0	0	0.06	NN2000	11	MSL	midpoint	0.229347	0.229347	-0.180577
198	TRa-3008A	Sorenson et al. 2014	2	Vestfold; Holtantjern (lok. 10)	59.0462	10.2113	1	2790	30	0	2790	30	2853.5	353.5	116.5	nd	1	corr	gyttja	terrestrial gyttja	marine gyttja	negative	0.85	0.25	0	nd	nd	nd	nd	0	0.05	0	0	0	0	0.2	0.01	0.1	0	0	0	0.06	NN2000	10.9	MSL	midpoint	0.229347	0.229347	-0.175771
199	TRa-3005A	Sorenson et al. 2014	2	Vestfold; Bålsrødtjern (lok. 11)	59.0181	9.86711	1	2460	40	0	2460	40	2549.75	211.25	364.75	nd	1	corr	gyttja	terrestrial gyttja	marine gyttja	negative	0.85	0.25	0	nd	nd	nd	nd	0	0.05	0	0	0	0	0.2	0.01	0.1	0	0	0	0.06	NN2000	10.4	MSL	midpoint	0.229347	0.229347	-0.17415
200	TRa-3006A	Sorenson et al. 2014	2	Vestfold; Mørjejern (lok. 12)	59.0437	9.83726	1	1310	25	0	1310	25	1196.75	185.25	221.75	nd	1	corr	gyttja	terrestrial gyttja	marine gyttja	negative	0.85	0.25	0	nd	nd	nd	nd	0	0.05	0	0	0	0	0.2	0.01	0.1	0	0	0	0.06	NN2000	3.5	MSL	midpoint	0.229347	0.229347	-0.174122
201	T-1380	Sorenson et al. 2014	2	Vestfold; Holkekilmyra (lok. 13)	59.0605	10.2084	1	1140	40	0	1140	40	1098.17	187.833	298.167	nd	1	corr	gyttja	terrestrial gyttja	marine gyttja	negative	0.85	0.25	0	nd	nd	nd	nd	0	0.05	0	0	0	0	0.2	0.01	0.1	0	0	0	0.06	NN2000	2.7	MSL	midpoint	0.229347	0.229347	-0.175747
202	Tua-4218A	Sorenson et al. 2014	2	Vestfold; Refsholttjern (lok. 14)	59.0262	10.1725	1	800	30	0	800	30	752.167	171.833	196.167	nd	1	corr	gyttja	terrestrial gyttja	marine gyttja	negative	0.85	0.25	0	nd	nd	nd	nd	0	0.05	0	0	0	0	0.2	0.01	0.1	0	0	0	0.06	NN2000	2	MSL	midpoint	0.229347	0.229347	-0.175473
203	Poz-32347	Vasskog et al. 2013	2	Nerfloen-STP107	61.9317	6.87	1	8480	40	0	8480	40	9502.75	34.25	59.75	lacustrine gyttja	0	corr	leaf fragments	lacustrine gyttja	marine gyttja	negative	n/a	n/a	n/a	piston corer	nd	nd	nd	0	0.1	0	0	0.01	0	0.3	0.016	0.1	0	0	0	0.06	NN2000	29	MSL	midpoint	0.332199	0.332199	-1.20061
204	Beta-319730	Vasskog et al. 2013	2	Oppstrynsvatnet-STP211	61.936	6.89	1	7340	40	0	7340	40	8123	166	100	lacustrine gyttja	0	corr	pieces of wood	lacustrine gyttja	tsunami deposit	negative	n/a	n/a	n/a	piston corer	nd	nd	nd	0	0.1	0	0	0.01	0	0.3	0.016	0.1	0	0	0	0.06	NN2000	29	MSL	midpoint	0.332199	0.332199	-1.2015
205	OS-67689	Balascio et al. 2011	2	Lofoten Islands; Heimerdalsvatnet; core NHP-207	68.2963	13.6563	1	1760	30	0	1760	30	1663	53	93	lacustrine	0	corr	Plant/Wood	lacustrine gyttja	marine silt	negative	n/a	n/a	n/a	modified Nesje percussion coring device	n/a	n/a	n/a	0	0.1	0	0	0	0	3	0.01	0.1	0	0	0	nd	nd	5	MSL	midpoint	3.00335	3.00335	-0.984192
206	OS-67681	Balascio et al. 2011	2	Lofoten Islands; Heimerdalsvatnet; core NHP-207	68.2963	13.6563	1	3610	35	0	3610	35	3931.75	143.25	99.75	lacustrine	0	corr	Plant/Wood	lacustrine gyttja	marine silt	negative	n/a	n/a	n/a	modified Nesje percussion coring device	n/a	n/a	n/a	0	0.1	0	0	0	0	3	0.01	0.1	0	0	0	nd	nd	5	MSL	midpoint	3.00335	3.00335	-0.984192
207	Beta-241113	Balascio et al. 2011	2	Lofoten Islands; Heimerdalsvatnet; core NHP-207	68.2963	13.6563	1	4550	40	0	4550	40	5178.33	254.667	129.333	lacustrine	0	corr	Plant/Wood	lacustrine gyttja	marine silt	negative	n/a	n/a	n/a	modified Nesje percussion coring device	n/a	n/a	n/a	0	0.1	0	0	0	0	3	0.01	0.1	0	0	0	nd	nd	5	MSL	midpoint	3.00335	3.00335	-0.984192
208	OS-67690	Balascio et al. 2011	2	Lofoten Islands; Heimerdalsvatnet; core NHP-207	68.2963	13.6563	1	5260	35	0	5260	35	6052	127	119	lacustrine	0	corr	Plant/Wood	lacustrine gyttja	marine silt	negative	n/a	n/a	n/a	modified Nesje percussion coring device	n/a	n/a	n/a	0	0.1	0	0	0	0	3	0.01	0.1	0	0	0	nd	nd	5	MSL	midpoint	3.00335	3.00335	-0.984192
209	Beta-241115	Balascio et al. 2011	2	Lofoten Islands; Heimerdalsvatnet; core NHP-207	68.2963	13.6563	1	7350	50	0	7350	50	8123.33	194.667	99.3333	marine	2	corr	Shell	lacustrine gyttja	marine silt	negative	n/a	n/a	n/a	modified Nesje percussion coring device	n/a	n/a	n/a	0	0.1	0	0	0	0	3	0.01	0.1	0	0	0	nd	nd	5	MSL	midpoint	3.00335	3.00335	-0.984192
210	TUa-5257A	Midtbo et al. 2011	2	Karmoy; rabbavatnet	59.3586	5.36	1	9575	60	0	9575	60	10271	234	170	Olive green gyttja with silt	0	corr	nd	fine detrital gyttja	silt clay	negative	n/a	n/a	n/a	nd	n/a	nd	nd	0	0.05	0	0	0	0	0.620104	0.01	0.1	0	0	0	0	NN2000	12	MSL	midpoint	0.630182	0.630182	-0.340256
211	TUa-5258A	Midtbo et al. 2011	2	Karmoy; rabbavatnet	59.3586	5.36	1	8830	50	0	8830	50	9952	203	262	Brown fine detrital gyttja	0	corr	nd	fine detrital gyttja	fine detrital gyttja	negative	n/a	n/a	n/a	nd	nd	nd	nd	0	0.05	0	0	0	0	0.616806	0.01	0.1	0	0	0	0	NN2000	12	MSL	midpoint	0.626936	0.626936	-0.340256
212	Beta-220863	Midtbo et al. 2011	2	Karmoy; Molltjorna	59.3391	5.44	1	9040	60	0	9040	60	10215	154	300	fine detrital gyttja	0	corr	plant remains	fine detrital gyttja	fine detrital gyttja	negative	n/a	n/a	n/a	nd	nd	nd	nd	0	0.05	0	0	0	0	0.5	0.01	0.1	0	0	0	0	NN2000	6.5	MSL	midpoint	0.512445	0.512445	-0.363809
213	Beta-220864	Midtbo et al. 2011	2	Karmoy; Molltjorna	59.3391	5.44	1	8340	50	0	8340	50	9375.33	102.667	233.333	fine detrital gyttja	0	corr	plant remains	fine detrital gyttja	fine detrital gyttja	positive	n/a	n/a	n/a	nd	nd	nd	nd	0	0.05	0	0	0	0	0.5	0.01	0.1	0	0	0	0	NN2000	6.5	MSL	midpoint	0.512445	0.512445	-0.363809
214	Beta-222020	Midtbo et al. 2011	2	Karmoy; Molltjorna	59.3391	5.44	1	5730	40	0	5730	40	6491.25	144.75	83.25	silty gyttja	0	corr	plant remains	fine detrital gyttja	nd	negative	n/a	n/a	n/a	nd	nd	nd	nd	0	0.05	0	0	0	0	0.5	0.01	0.1	0	0	0	0	NN2000	6.5	MSL	midpoint	0.512445	0.512445	-0.363809
215	Beta-222021	Midtbo et al. 2011	2	Karmoy; Molltjorna	59.3391	5.44	1	5340	40	0	5340	40	6103.88	167.125	104.875	silty gyttja	0	corr	plant remains	fine detrital gyttja	nd	positive	n/a	n/a	n/a	nd	nd	nd	nd	0	0.05	0	0	0	0	0.5	0.01	0.1	0	0	0	0	NN2000	6.5	MSL	midpoint	0.512445	0.512445	-0.363809
216	Beta-199973	Midtbo et al. 2011	2	Karmoy; royksund	59.3369	5.36	1	8450	40	0	8450	40	9497.75	37.25	165.75	gyttja	0	corr	charcoal	sand	gyttja	negative	n/a	n/a	n/a	nd	nd	nd	nd	0	0.05	0	0	0	0	0.5	0.01	0.1	0	0	0	0	NN2000	8.7	MSL	midpoint	0.512445	0.512445	-0.334102
217	Beta-199972	Midtbo et al. 2011	2	Karmoy; royksund	59.3369	5.36	1	5510	40	0	5510	40	6339.5	55.5	126.5	gyttja	0	corr	charcoal	grey silt	sand	positive	n/a	n/a	n/a	nd	nd	nd	nd	0	0.05	0	0	0	0	0.5	0.01	0.1	0	0	0	0	NN2000	8.7	MSL	midpoint	0.512445	0.512445	-0.334102
218	TUa-5261A	Midtbo et al. 2011	2	Karmoy; hoievatnet	59.3635	5.4	1	2265	40	0	2265	40	2242.5	105.5	90.5	nd	0	corr	nd	fine detrital gyttja	silty gyttja	negative	n/a	n/a	n/a	nd	nd	nd	nd	0	0.05	0	0	0	0	0.5	0.01	0.1	0	0	0	0	NN2000	3.5	MSL	midpoint	0.512445	0.512445	-0.345091
219	Beta-220862	Midtbo et al. 2011	2	Fossen; varanesveian	59.3185	5.36	1	10510	60	0	10510	60	12532	163	427	fine detrital gyttja	0	corr	nd	fine detrital gyttja	clay	negative	n/a	n/a	n/a	nd	nd	nd	nd	0	0.1	0	0	0	0	0.73	0.01	0.1	0	0	0	0	NN2000	23	MSL	midpoint	0.74364	0.74364	-0.328886
220	TUa-7696	Romundset et al. 2011	2	Rolvsoya; lillrundvatnet	70.9967	23.94	1	9838	55	0	9838	55	11235.5	159.5	58.5	laminated gyttja	0	corr	Drepanocladus leaved stems	lake gyttja	organic mud	negative	n/a	n/a	n/a	russian corer	nd	nd	nd	0	0.05	0	0	0	0	0.3	0.01	0.1	0	0	0	0.134	NN1954	5.83	MSL	midpoint	0.320312	0.320312	-1.22348
221	TUa-7697	Romundset et al. 2011	2	Rolvsoya; lillrundvatnet	70.9967	23.94	1	9838	55	0	9838	55	11235.5	159.5	58.5	laminated gyttja	0	corr	Numerous Salix herbacea leaves some ericaceae leaves	lake gyttja	organic mud	negative	n/a	n/a	n/a	russian corer	nd	nd	nd	0	0.05	0	0	0	0	0.3	0.01	0.1	0	0	0	0.134	NN1954	5.83	MSL	midpoint	0.320312	0.320312	-1.22348
222	TUa-7695	Romundset et al. 2011	2	Rolvsoya; storvatnet	70.9967	23.94	1	9624	48	0	9624	48	10991.9	188.125	219.875	laminated gyttja	0	corr	salix herbacea leaves drepanocladus stems	lake gyttja	organic mud	negative	n/a	n/a	n/a	russian corer	nd	nd	nd	0	0.05	0	0	0	0	0.3	0.01	0.1	0	0	0	0.134	NN1954	5.27	MSL	midpoint	0.320312	0.320312	-1.22348
223	TUa-7692	Romundset et al. 2011	2	Rolvsoya; storvatnet	70.9967	23.94	1	4460	37	0	4460	37	5096.12	195.875	177.125	laminated gyttja	0	corr	enpetrum nigrum leaves salix herbacea leaves	lake gyttja	laminated mud	negative	n/a	n/a	n/a	russian corer	nd	nd	nd	0	0.05	0	0	0	0	0.3	0.01	0.1	0	0	0	0.134	NN1954	5.27	MSL	midpoint	0.320312	0.320312	-1.22348
224	TUa-7694	Romundset et al. 2011	2	Rolvsoya; storvatnet	70.9967	23.94	1	7123	41	0	7123	41	7917.75	100.25	58.75	laminated gyttja	0	corr	empetrum nigrum leaves other fragments of terr. plants	organic mud	laminated gyttja	positive	n/a	n/a	n/a	russian corer	nd	nd	nd	0	0.05	0	0	0	0	0.3	0.01	0.1	0	0	0	0.134	NN1954	5.27	MSL	midpoint	0.320312	0.320312	-1.22348
225	TUa-7103	Romundset et al. 2011	2	Soroya; tomasvatnet	70.5633	22.63	1	9719	53	0	9719	53	11147	96	338	laminated gyttja	0	corr	drepanocladus leaved stems	muddy gyttja	organic mud	negative	n/a	n/a	n/a	russian corer	nd	nd	nd	0	0.05	0	0	0	0	0.3	0.01	0.1	0	0	0	0.134	NN1954	17	MSL	midpoint	0.320312	0.320312	-1.27581
226	TUa-7106	Romundset et al. 2011	2	Soroya; lillevatnet	70.6167	22.72	1	5689	35	0	5689	35	6440.75	179.25	44.75	lake gyttja	0	corr	Piece of Betula twig	lake gyttja	laminated muddy gyttja	negative	n/a	n/a	n/a	russian corer	nd	nd	nd	0	0.05	0	0	0	0	0.3	0.01	0.1	0	0	0	0.134	NN1954	11	MSL	midpoint	0.320312	0.320312	-1.2824
227	TUa-7108	Romundset et al. 2011	2	Soroya; lillevatnet	70.6167	22.72	1	7238	42	0	7238	42	8066.5	103.5	96.5	laminatted gyttja	0	corr	Juniper twig with bark	organic mud	sandy mud	positive	n/a	n/a	n/a	russian corer	nd	nd	nd	0	0.05	0	0	0	0	0.3	0.01	0.1	0	0	0	0.134	NN1954	11	MSL	midpoint	0.320312	0.320312	-1.2824
228	Tra-404	Romundset et al. 2011	2	Soroya; lillevatnet	70.6167	22.72	1	7238	42	0	7238	42	8066.5	103.5	96.5	laminated gyttja	0	corr	Terrestrial plant remains	organic mud	sandy mud	positive	579-588	n/a	n/a	russian corer	nd	nd	nd	0	0.05	0	0	0	0	0.3	0.01	0.1	0	0	0	0.134	NN1954	11	MSL	midpoint	0.320312	0.320312	-1.2824
229	TUa-7700	Romundset et al. 2011	2	Nordkinn; Mellomste Snappvikvatnet 11	70.9383	27.31	1	9347	56	0	9347	56	10591.5	123.5	282.5	laminated silty gyttja	0	corr	betula pubescens leaves seeds catkins salix herbaccea leaf fragments ericaceae leaves			negative	n/a	n/a	n/a	russian corer	nd	nd	nd	0	0.05	0	0	0	0	0.3	0.01	0.1	0	0	0	0.134	NN1954	23.74	MSL	midpoint	0.320312	0.320312	-1.24864
230	TUa-7699	Romundset et al. 2011	2	Nordkinn; Nedre Snappvikvatnet 10	70.9433	27.3	1	9377	46	0	9377	46	10581.5	142.5	142.5	laminated gyttja	0	corr	Small Betula twig with unharmed bark betula pubescens seeds some other plant remains	lake gyttja	laminated silt	negative	n/a	n/a	n/a	russian corer	nd	nd	nd	0	0.05	0	0	0	0	0.3	0.01	0.1	0	0	0	0.134	NN1954	18.18	MSL	midpoint	0.320312	0.320312	-1.24667
231	TUa-7704	Romundset et al. 2011	2	Nordkinn; Kifjordvatnet 14	70.925	27.44	1	4591	42	0	4591	42	5294.5	167.5	241.5	silty mud with clasts	0	corr	betula leaves seeds stems ruppia fruit	lake gyttja	laminated silt	negative	n/a	n/a	n/a	russian corer	nd	nd	nd	0	0.05	0	0	0	0	0.3	0.01	0.1	0	0	0	0.134	NN1954	10.61	MSL	midpoint	0.320312	0.320312	-1.24235
232	TUa-7707	Romundset et al. 2011	2	Nordkinn; nameless 15	70.9233	27.43	1	8713	64	0	8713	64	9605	299	66	laminated gyttja	0	corr	Carex seeds plant stems leaf fragments	lacustrine gyttja	marine silt	negative	n/a	n/a	n/a	russian corer	nd	nd	nd	0	0.05	0	0	0	0	0.3	0.01	0.1	0	0	0	0.134	NN1954	13.1	MSL	midpoint	0.320312	0.320312	-1.24351
233	Poz-14253	Romundset et al. 2010a	2	Hardangerfjorden; Hogstemyr (505-150)	60.25	6.16	1	9770	50	0	9770	50	11210.5	56.5	310.5	lacustrine gyttja	0	corr	triggs viola seed	lacustrine gyttja	lacustrine gyttja	negative	n/a	n/a	n/a	russian corer	1.117	nd	nd	0	0.1	0	0	0	0	0.3	0.01	0.1	0	0	0	nd	NN1954	100	MSL	midpoint	0.331813	0.331813	-0.360703
234	Poz-14618	Romundset et al. 2010a	2	Hardangerfjorden; Hogstemyr (505-150)	60.25	6.16	1	9780	50	0	9780	50	11213.5	59.5	114.5	lacustrine gyttja	0	corr	mosses dryas leaf	lacustrine gyttja	lacustrine gyttja	negative	n/a	n/a	n/a	russian corer	1.129	nd	nd	0	0.1	0	0	0	0	0.3	0.01	0.1	0	0	0	nd	NN1954	100	MSL	midpoint	0.331813	0.331813	-0.360703
235	Poz-14247	Romundset et al. 2010a	2	Hardangerfjorden; Tangatjorn (505-52)	60.25	6.15	1	8990	50	0	8990	50	10194.5	46.5	280.5	lacustrine gyttja	0	corr	leaves seeds unidentified	lacustrine gyttja	lacustrine gyttja	negative	n/a	n/a	n/a	russian corer	1.1355	nd	nd	0	0.1	0	0	0	0	0.3	0.01	0.1	0	0	0	nd	NN1954	74.5	MSL	midpoint	0.331813	0.331813	-0.344559
236	Poz-14248	Romundset et al. 2010a	2	Hardangerfjorden; Tangatjorn (505-52)	60.25	6.15	1	9350	50	0	9350	50	10592.2	114.75	185.25	lacustrine gyttja	0	corr	leaves seeds unidentified	lacustrine gyttja	lacustrine gyttja	negative	n/a	n/a	n/a	russian corer	1.143	nd	nd	0	0.1	0	0	0	0	0.3	0.01	0.1	0	0	0	nd	NN1954	74.5	MSL	midpoint	0.331813	0.331813	-0.344559
237	Poz-14249	Romundset et al. 2010a	2	Hardangerfjorden; Tangatjorn (505-52)	60.25	6.15	1	9680	50	0	9680	50	11024.5	188.5	231.5	laminated lacustrine-brackish sediments	0	corr	leaves seeds unidentified	lacustrine gyttja	marine sediments	negative	n/a	n/a	n/a	russian corer	1.1355	nd	nd	0	0.1	0	0	0	0	0.3	0.01	0.1	0	0	0	nd	NN1954	74.5	MSL	midpoint	0.331813	0.331813	-0.344559
238	Poz-14251	Romundset et al. 2010a	2	Hardangerfjorden; Tangatjorn (505-52)	60.25	6.15	1	9620	50	0	9620	50	10961.8	217.25	193.75	marine sediments	0	corr	leaves seeds unidentified	marine sediments	marine sediments	negative	n/a	n/a	n/a	russian corer	1.143	nd	nd	0	0.1	0	0	0	0	0.3	0.01	0.1	0	0	0	nd	NN1954	74.5	MSL	midpoint	0.331813	0.331813	-0.344559
239	Poz-14252	Romundset et al. 2010a	2	Hardangerfjorden; Tangatjorn (505-52)	60.25	6.15	1	9800	50	0	9800	50	11220.5	97.5	73.5	marine sediments	0	corr	unidentified twigs	marine sediments	marine sediments	negative	n/a	n/a	n/a	russian corer	1.155	nd	nd	0	0.1	0	0	0	0	0.3	0.01	0.1	0	0	0	nd	NN1954	74.5	MSL	midpoint	0.331813	0.331813	-0.344559
240	Poz-14173	Romundset et al. 2010a	2	Hardangerfjorden; Tangatjorn (505-52)	60.25	6.15	1	10360	50	0	10360	50	12237.5	234.5	265.5	marine sediments	2	corr	mytilus edulis	marine sediments	marine sediments	negative	n/a	n/a	n/a	russian corer	1.1265	nd	nd	0	0.1	0	0	0	0	0.3	0.01	0.1	0	0	0	nd	NN1954	74.5	MSL	midpoint	0.331813	0.331813	-0.344559
241	Poz-13274	Romundset et al. 2010a	2	Hardangerfjorden; Eidesvatn (505-36)	60.2733	6.16	1	2505	35	0	2505	35	1798.5	184.5	172.5	lacustrine gyttja	0	corr	unidentified leaves twigs	lacustrine gyttja	lacustrine gyttja	negative	n/a	n/a	n/a	russian corer	4.9505	nd	nd	0	0.1	0	0	0	0	0.3	0.01	0.1	0	0	0	nd	NN1954	33	MSL	midpoint	0.331813	0.331813	-0.361829
242	Poz-13275	Romundset et al. 2010a	2	Hardangerfjorden; Eidesvatn (505-36)	60.2733	6.16	1	5700	40	0	5700	40	6442.75	182.25	43.75	lacustrine gyttja	0	corr	unidentified leaves twigs	lacustrine gyttja	lacustrine gyttja	negative	n/a	n/a	n/a	russian corer	5.1005	nd	nd	0	0.1	0	0	0	0	0.3	0.01	0.1	0	0	0	nd	NN1954	33	MSL	midpoint	0.331813	0.331813	-0.361829
243	Poz-13277	Romundset et al. 2010a	2	Hardangerfjorden; Eidesvatn (505-36)	60.2733	6.16	1	8820	50	0	8820	50	9966	190	287	lacustrine gyttja	0	corr	unidentified grass	lacustrine gyttja	lacustrine gyttja	negative	n/a	n/a	n/a	russian corer	5.2685	nd	nd	0	0.1	0	0	0	0	0.3	0.01	0.1	0	0	0	nd	NN1954	33	MSL	midpoint	0.331813	0.331813	-0.361829
244	Poz-13276	Romundset et al. 2010a	2	Hardangerfjorden; Eidesvatn (505-36)	60.2733	6.16	1	6480	40	0	6480	40	7392	81	107	terrestrial sand	0	corr	piece of wood	disturbed silt	lacustrine gyttja	negative	n/a	n/a	n/a	russian corer	5.3035	nd	nd	0	0.1	0	0	0	0	0.3	0.01	0.1	0	0	0	nd	NN1954	33	MSL	midpoint	0.331813	0.331813	-0.361829
245	Poz-8081	Romundset et al. 2010a	2	Hardangerfjorden; Eidesvatn (505-36)	60.2733	6.16	1	8840	50	0	8840	50	9951.4	205.6	251.4	laminated brackish sediments	0	corr	betula leaves	lacustrine sediment	marine sediment	negative	n/a	n/a	n/a	russian corer	5.3135	nd	nd	0	0.1	0	0	0	0	0.3	0.01	0.1	0	0	0	nd	NN1954	33	MSL	midpoint	0.331813	0.331813	-0.361829
246	Poz-8088	Romundset et al. 2010a	2	Hardangerfjorden; Eidesvatn (505-36)	60.2733	6.16	1	8840	50	0	8840	50	9951.4	205.6	251.4	laminated brackish sediments	0	corr	betula leaves	lacustrine sediment	marine sediment	negative	n/a	n/a	n/a	russian corer	5.3145	nd	nd	0	0.1	0	0	0	0	0.3	0.01	0.1	0	0	0	nd	NN1954	33	MSL	midpoint	0.331813	0.331813	-0.361829
247	Poz-8080	Romundset et al. 2010a	2	Hardangerfjorden; Eidesvatn (505-36)	60.2733	6.16	1	8900	50	0	8900	50	10010.1	185.9	228.1	laminated brackish sediments	0	corr	betula leaves	lacustrine sediment	marine sediment	negative	n/a	n/a	n/a	russian corer	5.3155	nd	nd	0	0.1	0	0	0	0	0.3	0.01	0.1	0	0	0	nd	NN1954	33	MSL	midpoint	0.331813	0.331813	-0.361829
248	Poz-8078	Romundset et al. 2010a	2	Hardangerfjorden; Eidesvatn (505-36)	60.2733	6.16	1	9100	50	0	9100	50	10254	222	68	laminated brackish sediments	0	corr	betula leaves	lacustrine sediment	marine sediment	negative	n/a	n/a	n/a	russian corer	5.3165	nd	nd	0	0.1	0	0	0	0	0.3	0.01	0.1	0	0	0	nd	NN1954	33	MSL	midpoint	0.331813	0.331813	-0.361829
249	Poz-8084	Romundset et al. 2010a	2	Hardangerfjorden; Eidesvatn (505-36)	60.2733	6.16	1	8880	50	0	8880	50	10042	144	273	laminated brackish sediments	0	corr	betula leaves	lacustrine sediment	marine sediment	negative	n/a	n/a	n/a	russian corer	5.3175	nd	nd	0	0.1	0	0	0	0	0.3	0.01	0.1	0	0	0	nd	NN1954	33	MSL	midpoint	0.331813	0.331813	-0.361829
250	Poz-6408	Romundset et al. 2010a	2	Hardangerfjorden; Eidesvatn (505-36)	60.2733	6.16	1	9840	50	0	9840	50	11237	155	52	marine sediment	2	corr	litorina littorea whole shell	marine sediment	marine sediment	negative	n/a	n/a	n/a	russian corer	5.3755	nd	nd	0	0.1	0	0	0	0	0.3	0.01	0.1	0	0	0	nd	NN1954	33	MSL	midpoint	0.331813	0.331813	-0.361829
251	Poz-6409	Romundset et al. 2010a	2	Hardangerfjorden; Eidesvatn (505-36)	60.2733	6.16	1	10390	50	0	10390	50	11196	245	194	marine sediment	2	corr	half shell nuculana pernula	marine sediment	marine sediment	negative	n/a	n/a	n/a	russian corer	5.4545	nd	nd	0	0.1	0	0	0	0	0.3	0.01	0.1	0	0	0	nd	NN1954	33	MSL	midpoint	0.331813	0.331813	-0.361829
252	Poz-6410	Romundset et al. 2010a	2	Hardangerfjorden; Eidesvatn (505-37)	60.2733	6.16	1	9950	50	0	9950	50	10580	244	264	marine sediment	2	corr	half half of macoma calcarea	marine sediment	marine sediment	negative	n/a	n/a	n/a	russian corer	4.7995	nd	nd	0	0.1	0	0	0	0	0.3	0.01	0.1	0	0	0	nd	NN1954	33	MSL	midpoint	0.331813	0.331813	-0.361829
253	Poz-6411	Romundset et al. 2010a	2	Hardangerfjorden; Eidesvatn (505-37)	60.2733	6.16	1	10230	50	0	10230	50	10992.5	199.5	242.5	glaciomarine sediment	2	corr	unidentified shell fragments	marine sediment	glaciomarine sediment	negative	n/a	n/a	n/a	russian corer	4.855	nd	nd	0	0.1	0	0	0	0	0.3	0.01	0.1	0	0	0	nd	NN1954	33	MSL	midpoint	0.331813	0.331813	-0.361829
254	Poz-6413	Romundset et al. 2010a	2	Hardangerfjorden; Eidesvatn (505-37)	60.2733	6.16	1	10330	50	0	10330	50	11139	182	269	glaciomarine sediment	2	corr	unidentified shell fragments	glaciomarine sediment	glaciomarine sediment	negative	n/a	n/a	n/a	russian corer	4.8925	nd	nd	0	0.1	0	0	0	0	0.3	0.01	0.1	0	0	0	nd	NN1954	33	MSL	midpoint	0.331813	0.331813	-0.361829
255	Poz-6412	Romundset et al. 2010a	2	Hardangerfjorden; Eidesvatn (505-37)	60.2733	6.16	1	10610	50	0	10610	50	11493	263	244	glaciomarine sediment	2	corr	unidentified shell fragments	glaciomarine sediment	glaciomarine sediment	negative	n/a	n/a	n/a	russian corer	4.9065	nd	nd	0	0.1	0	0	0	0	0.3	0.01	0.1	0	0	0	nd	NN1954	33	MSL	midpoint	0.331813	0.331813	-0.361829
256	Poz-6414	Romundset et al. 2010a	2	Hardangerfjorden; Eidesvatn (505-38)	60.2733	6.16	1	9840	50	0	9840	50	10426.5	216.5	204.5	marine sediment	2	corr	half mya truncata	marine sediment	marine sediment	negative	n/a	n/a	n/a	russian corer	1050	nd	nd	0	0.1	0	0	0	0	0.3	0.01	0.1	0	0	0	nd	NN1954	33	MSL	midpoint	0.331813	0.331813	-0.361829
257	Poz-8082	Romundset et al. 2010a	2	Hardangerfjorden; Eidesvatn (505-42)	60.2733	6.16	1	1115	30	0	1115	30	429.5	101.5	147.5	lacustrine sediment	0	corr	betula leaves	lacustrine sediment	lacustrine sediment	negative	n/a	n/a	n/a	russian corer	4.9455	nd	nd	0	0.1	0	0	0	0	0.3	0.01	0.1	0	0	0	nd	NN1954	33	MSL	midpoint	0.331813	0.331813	-0.361829
258	Poz-8079	Romundset et al. 2010a	2	Hardangerfjorden; Eidesvatn (505-42)	60.2733	6.16	1	1555	30	0	1555	30	1465.62	55.375	93.625	lacustrine sediment	0	corr	betula leaves	lacustrine sediment	lacustrine sediment	negative	n/a	n/a	n/a	russian corer	4.9755	nd	nd	0	0.1	0	0	0	0	0.3	0.01	0.1	0	0	0	nd	NN1954	33	MSL	midpoint	0.331813	0.331813	-0.361829
259	Poz-13868	Romundset et al. 2010a	2	Hardangerfjorden; Storemyr (505-51)	60.3067	6.15	1	8410	40	0	8410	40	9453.5	75.5	147.5	lacustrine sediment	0	corr	unidentified leaves	lacustrine sediment	lacustrine sediment	negative	n/a	n/a	n/a	russian corer	1.0515	nd	nd	0	0.1	0	0	0	0	0.3	0.01	0.1	0	0	0	nd	NN1954	30	MSL	midpoint	0.331813	0.331813	-0.347408
260	Poz-13869	Romundset et al. 2010a	2	Hardangerfjorden; Storemyr (505-51)	60.3067	6.15	1	8700	50	0	8700	50	9601.5	287.5	59.5	lacustrine sediment	0	corr	unidentified leaves	lacustrine sediment	lacustrine sediment	negative	n/a	n/a	n/a	russian corer	1.0585	nd	nd	0	0.1	0	0	0	0	0.3	0.01	0.1	0	0	0	nd	NN1954	30	MSL	midpoint	0.331813	0.331813	-0.347408
261	Poz-13870	Romundset et al. 2010a	2	Hardangerfjorden; Storemyr (505-51)	60.3067	6.15	1	8730	50	0	8730	50	9614.25	277.75	65.25	lacustrine sediment	0	corr	unidentified leaves	lacustrine sediment	lacustrine sediment	negative	n/a	n/a	n/a	russian corer	1.0655	nd	nd	0	0.1	0	0	0	0	0.3	0.01	0.1	0	0	0	nd	NN1954	30	MSL	midpoint	0.331813	0.331813	-0.347408
262	Poz-13872	Romundset et al. 2010a	2	Hardangerfjorden; Storemyr (505-51)	60.3067	6.15	1	8920	50	0	8920	50	10048.4	170.625	227.375	lacustrine sediment	0	corr	unidentified leaves	lacustrine sediment	laminated lacustrine-brackish sediment	negative	n/a	n/a	n/a	russian corer	1.0655	nd	nd	0	0.1	0	0	0	0	0.3	0.01	0.1	0	0	0	nd	NN1954	30	MSL	midpoint	0.331813	0.331813	-0.347408
263	Poz-13873	Romundset et al. 2010a	2	Hardangerfjorden; Storemyr (505-51)	60.3067	6.15	1	8770	50	0	8770	50	9803.5	311.5	251.5	laminated brackish-lacustrine sediment	0	corr	unidentified leaves	lacustrine sediment	marine sediment	negative	n/a	n/a	n/a	russian corer	1.0745	nd	nd	0	0.1	0	0	0	0	0.3	0.01	0.1	0	0	0	nd	NN1954	30	MSL	midpoint	0.331813	0.331813	-0.347408
264	Poz-13874	Romundset et al. 2010a	2	Hardangerfjorden; Storemyr (505-51)	60.3067	6.15	1	8750	50	0	8750	50	9742	367	194	laminated brackish-lacustrine sediment	0	corr	unidentified leaves	lacustrine sediment	marine sediment	negative	n/a	n/a	n/a	russian corer	1.0775	nd	nd	0	0.1	0	0	0	0	0.3	0.01	0.1	0	0	0	nd	NN1954	30	MSL	midpoint	0.331813	0.331813	-0.347408
265	Poz-13876	Romundset et al. 2010a	2	Hardangerfjorden; Storemyr (505-51)	60.3067	6.15	1	8900	50	0	8900	50	10010.1	185.9	228.1	laminated brackish-lacustrine sediment	0	corr	unidentified leaves	lacustrine sediment	marine sediment	negative	n/a	n/a	n/a	russian corer	1.0805	nd	nd	0	0.1	0	0	0	0	0.3	0.01	0.1	0	0	0	nd	NN1954	30	MSL	midpoint	0.331813	0.331813	-0.347408
266	Poz-13877	Romundset et al. 2010a	2	Hardangerfjorden; Storemyr (505-51)	60.3067	6.15	1	8930	50	0	8930	50	10049.4	169.625	151.375	laminated brackish-lacustrine sediment	0	corr	unidentified leaves	lacustrine sediment	marine sediment	negative	n/a	n/a	n/a	russian corer	1.0825	nd	nd	0	0.1	0	0	0	0	0.3	0.01	0.1	0	0	0	nd	NN1954	30	MSL	midpoint	0.331813	0.331813	-0.347408
267	Poz-13863	Romundset et al. 2010a	2	Hardangerfjorden; Storemyr Russian cores	60.3067	6.15	1	8930	50	0	8930	50	10049.4	169.625	151.375	marine sediments	0	corr	unidentified leaves	laminated brackish-lacustrine sediment	marine sediment	negative	n/a	n/a	n/a	russian corer	nd	nd	nd	0	0.1	0	0	0	0	0.3	0.01	0.1	0	0	0	nd	NN1954	30	MSL	midpoint	0.331813	0.331813	-0.347408
268	Poz-14174	Romundset et al. 2010a	2	Hardangerfjorden; Storemyr (505-146)	60.3067	6.15	1	10140	50	0	10140	50	11712	228	307	marine sediments	2	corr	macoma calcarea paired shell	laminated brackish-lacustrine sediment	marine sediment	negative	n/a	n/a	n/a	russian corer	1.0865	nd	nd	0	0.1	0	0	0	0	0.3	0.01	0.1	0	0	0	nd	NN1954	30	MSL	midpoint	0.331813	0.331813	-0.347408
269	Poz-14171	Romundset et al. 2010a	2	Hardangerfjorden; Storemyr (505-146)	60.3067	6.15	1	10050	50	0	10050	50	10718.5	304.5	211.5	marine sediments	2	corr	litorina littorea whole shell	laminated brackish-lacustrine sediment	marine sediment	negative	n/a	n/a	n/a	russian corer	1.265	nd	nd	0	0.1	0	0	0	0	0.3	0.01	0.1	0	0	0	nd	NN1954	30	MSL	midpoint	0.331813	0.331813	-0.347408
270	Poz-14175	Romundset et al. 2010a	2	Hardangerfjorden; Storemyr (505-146)	60.3067	6.15	1	9780	50	0	9780	50	10331	230	161	marine sediments	2	corr	macoma calcarea shell fragment	laminated brackish-lacustrine sediment	marine sediment	negative	n/a	n/a	n/a	russian corer	1.265	nd	nd	0	0.1	0	0	0	0	0.3	0.01	0.1	0	0	0	nd	NN1954	30	MSL	midpoint	0.331813	0.331813	-0.347408
271	Poz-8075	Romundset et al. 2010a	2	Hardangerfjorden; Bergsvatn (505-39)	60.3083	6.16	1	5110	40	0	5110	40	5071.5	204.5	200.5	lacustrine sediment	0	corr	betula leaves	lacustrine sediment	laminated lacustrine-brackish sediment	negative	n/a	n/a	n/a	russian corer	1.635	nd	nd	0	0.1	0	0	0	0	0.3	0.01	0.1	0	0	0	nd	NN1954	16.55	MSL	midpoint	0.331813	0.331813	-0.363523
272	Poz-8070	Romundset et al. 2010a	2	Hardangerfjorden; Bergsvatn (505-39)	60.3083	6.16	1	5350	40	0	5350	40	6135	140	135	laminated brackish-lacustrine sediment	0	corr	betula leaves	lacustrine sediment	marine sediment	negative	n/a	n/a	n/a	russian corer	1.6445	nd	nd	0	0.1	0	0	0	0	0.3	0.01	0.1	0	0	0	nd	NN1954	16.55	MSL	midpoint	0.331813	0.331813	-0.363523
273	Poz-8085	Romundset et al. 2010a	2	Hardangerfjorden; Bergsvatn (505-39)	60.3083	6.16	1	5400	35	0	5400	35	6230.5	59.5	216.5	laminated brackish-lacustrine sediment	0	corr	betula leaves	lacustrine sediment	marine sediment	negative	n/a	n/a	n/a	russian corer	1.6455	nd	nd	0	0.1	0	0	0	0	0.3	0.01	0.1	0	0	0	nd	NN1954	16.55	MSL	midpoint	0.331813	0.331813	-0.363523
274	Poz-8086	Romundset et al. 2010a	2	Hardangerfjorden; Bergsvatn (505-39)	60.3083	6.16	1	5590	35	0	5590	35	6358.67	83.3333	59.6667	laminated brackish-lacustrine sediment	0	corr	betula leaves pinus needle	lacustrine sediment	marine sediment	negative	n/a	n/a	n/a	russian corer	1.6555	nd	nd	0	0.1	0	0	0	0	0.3	0.01	0.1	0	0	0	nd	NN1954	16.55	MSL	midpoint	0.331813	0.331813	-0.363523
275	Poz-7977	Romundset et al. 2010a	2	Hardangerfjorden; Bergsvatn (505-132)	60.3083	6.16	1	9020	50	0	9020	50	10209.5	41.5	289.5	glaciomarine sediment	0	corr	betula leaves	laminated lacustrine-brackish sediment	marine sediment	negative	n/a	n/a	n/a	russian corer	0.685	nd	nd	0	0.1	0	0	0	0	0.3	0.01	0.1	0	0	0	nd	NN1954	16.55	MSL	midpoint	0.331813	0.331813	-0.363523
276	Poz-7978	Romundset et al. 2010a	2	Hardangerfjorden; Bergsvatn (505-134)	60.3083	6.16	1	10070	50	0	10070	50	11536.2	281.833	185.167	glaciomarine sediment	2	corr	mya truncata paired	laminated lacustrine-brackish sediment	marine sediment	negative	n/a	n/a	n/a	russian corer	0.845	nd	nd	0	0.1	0	0	0	0	0.3	0.01	0.1	0	0	0	nd	NN1954	16.55	MSL	midpoint	0.331813	0.331813	-0.363523
277	Poz-13015	Romundset et al. 2010a	2	Hardangerfjorden; Torvikvatn (505-44)	60.2983	6.16	1	1355	35	0	1355	35	605.5	127.5	115.5	laminated brackish-lacustrine sediment	2	corr	yoldiella one half	lacustrine sediment	marine sediment	negative	n/a	n/a	n/a	russian corer	3.1605	nd	nd	0	0.1	0	0	0	0	0.3	0.01	0.1	0	0	0	nd	NN1954	3.5	MSL	midpoint	0.331813	0.331813	-0.363039
278	Poz-13016	Romundset et al. 2010a	2	Hardangerfjorden; Torvikvatn (505-44)	60.2983	6.16	1	1555	30	0	1555	30	783.5	142.5	124.5	laminated brackish-lacustrine sediment	0	corr	betula leaves	lacustrine sediment	marine sediment	negative	n/a	n/a	n/a	russian corer	3.1689	nd	nd	0	0.1	0	0	0	0	0.3	0.01	0.1	0	0	0	nd	NN1954	3.5	MSL	midpoint	0.331813	0.331813	-0.363039
279	Poz-14246	Romundset et al. 2010a	2	Hardangerfjorden; Torvikvatn (505-44)	60.2983	6.16	1	1615	30	0	1615	30	1469	70	60	laminated brackish-lacustrine sediment	0	corr	betula leaves	lacustrine sediment	marine sediment	negative	n/a	n/a	n/a	russian corer	3.1735	nd	nd	0	0.1	0	0	0	0	0.3	0.01	0.1	0	0	0	nd	NN1954	3.5	MSL	midpoint	0.331813	0.331813	-0.363039
280	Poz-8076	Romundset et al. 2010a	2	Hardangerfjorden; Torvikvatn (505-44)	60.2983	6.16	1	1710	30	0	1710	30	1605.83	91.1667	70.8333	laminated brackish-lacustrine sediment	0	corr	betula leaves	lacustrine sediment	marine sediment	negative	n/a	n/a	n/a	russian corer	3.1805	nd	nd	0	0.1	0	0	0	0	0.3	0.01	0.1	0	0	0	nd	NN1954	3.5	MSL	midpoint	0.331813	0.331813	-0.363039
281	Poz-8074	Romundset et al. 2010a	2	Hardangerfjorden; Torvikvatn (505-44)	60.2983	6.16	1	1925	30	0	1925	30	1852.5	71.5	109.5	laminated brackish-lacustrine sediment	0	corr	betula leaves	lacustrine sediment	marine sediment	negative	n/a	n/a	n/a	russian corer	3.1905	nd	nd	0	0.1	0	0	0	0	0.3	0.01	0.1	0	0	0	nd	NN1954	3.5	MSL	midpoint	0.331813	0.331813	-0.363039
282	Poz-8154	Romundset et al. 2010a	2	Hardangerfjorden; Torvikvatn (505-44)	60.2983	6.16	1	2215	35	0	2215	35	2228.5	103.5	102.5	laminated brackish-lacustrine sediment	0	corr	twig unidentified	lacustrine sediment	marine sediment	negative	n/a	n/a	n/a	russian corer	3.2005	nd	nd	0	0.1	0	0	0	0	0.3	0.01	0.1	0	0	0	nd	NN1954	3.5	MSL	midpoint	0.331813	0.331813	-0.363039
283	Poz-8111	Romundset et al. 2010a	2	Hardangerfjorden; Torvikvatn (505-46)	60.2983	6.16	1	4815	35	0	4815	35	5539.25	54.75	62.25	marine sediment	0	corr	betula leaves	marine sediment	marine sediment	negative	n/a	n/a	n/a	russian corer	3.774	nd	nd	0	0.1	0	0	0	0	0.3	0.01	0.1	0	0	0	nd	NN1954	3.5	MSL	midpoint	0.331813	0.331813	-0.363039
284	TUa-4423	Karlsen 2009	2	Stord; Dafjordsmyr	59.8416	5.36	1	12160	125	0	12160	125	13995.8	826.25	230.75	silty gyttja	0	corr	salix herbacea leaves	lacustrine sediment	lacustrine sediment	negative	0.67	n/a	n/a	russian corer	nd	nd	nd	0	0.1	0	0	0	0	0.3	0.01	0.1	0	0	0	nd	2009	41	MSL	midpoint	0.331813	0.331813	-0.416414
285	TUa-4132	Karlsen 2009	2	Stord; Dafjordsmyr	59.8416	5.36	1	12160	125	0	12160	125	13995.8	826.25	230.75	silty gyttja	0	corr	salix herbacea leaves	lacustrine sediment	marine sediment	negative	0.674	n/a	n/a	russian corer	nd	nd	nd	0	0.1	0	0	0	0	0.3	0.01	0.1	0	0	0	nd	2009	41	MSL	midpoint	0.331813	0.331813	-0.416414
286	Tua-4130	Karlsen 2009	2	Stord; Vassnestjern	59.6355	5.23	1	12115	80	0	12115	80	13970.2	221.75	177.25	silty gyttja	0	corr	Dryas leaves salix leaves twigs empetrum seed	lacustrine sediment	lacustrine sediment	negative	0.94	n/a	n/a	russian corer	nd	nd	nd	0	0.1	0	0	0	0	0.3	0.01	0.1	0	0	0	nd	2009	52	MSL	midpoint	0.331813	0.331813	-0.387341
287	Tua-3817	Karlsen 2009	2	Stord; Vassnestjern	59.6355	5.23	1	12115	80	0	12115	80	13970.2	221.75	177.25	silty gyttja	0	corr	salix herbacea leaves	lacustrine sediment	lacustrine sediment	negative	0.969	n/a	n/a	russian corer	nd	nd	nd	0	0.1	0	0	0	0	0.3	0.01	0.1	0	0	0	nd	2009	52	MSL	midpoint	0.331813	0.331813	-0.387341
288	Tua-2032	Helle 2008, paper 3	2	Ljanes Hardangerfjorden; Tveitatjorna	60.2595	6.12	1	10090	95	0	10090	95	11537.1	896.875	306.125	light brown massive gyttja clay with rare macrofossils	1	corr	lacustrine sediments	massive clayey silt with aquatic macrofossils	brownish black thickly laminated gyttja	negative	4.255	n/a	n/a	nd	nd	nd	nd	0	0.1	0	0	0.09	0	0.3	0.01	0.1	0	0	0	nd	2008	99.43	MSL	midpoint	0.343802	0.343802	-0.306545
289	T-13447A	Helle 2008, paper 3	2	Ljanes Hardangerfjorden; 89-m basin	60.2763	6.19	1	9835	130	0	9835	130	11437.7	381.333	698.667	greyish-brown massive gyttja clay	1	corr	lacustrine sediments	pale faintly laminated gyttja clay	grey massive silty sand	negative	4.29	n/a	n/a	nd	nd	nd	nd	0	0.1	0	0	0.09	0	0.3	0.01	0.1	0	0	0	nd	2008	88.65	MSL	midpoint	0.343802	0.343802	-0.407352
290	Beta-127164	Helle 2008, paper 3	2	Ljanes Hardangerfjorden; Mjadalsmyra	60.277	6.18	1	11950	40	0	11950	40	13867.2	155.833	253.167	brownish grey gytta clay with sea weed remains	0	corr	seaweed macroremains	olive-grey clayey silt with frequent sea weed remains	olive-grey clayey silt with frequent sea weed remains	negative	5.08	n/a	n/a	nd	nd	nd	nd	0	0.1	0	0	0.09	0	0.3	0.01	0.1	0	0	0	nd	2008	85.58	MSL	midpoint	0.343802	0.343802	-0.39488
291	T-13445A	Helle 2008, paper 3	2	Ljanes Hardangerfjorden; Mjadalsmyra	60.277	6.18	1	9225	90	0	9225	90	10366	693	401	lacustrine sediments	1	corr	lacustrine sediments	clayey silt with rare seaweed remains	olive grey clayey silt. With seaweed remains	negative	4.97	n/a	n/a	nd	nd	nd	nd	0	0.1	0	0	0.09	0	0.3	0.01	0.1	0	0	0	nd	2008	85.58	MSL	midpoint	0.343802	0.343802	-0.39488
292	T-12593A	Helle 2008, paper 3	2	Ljanes Hardangerfjorden; Kollveittjorna	60.2634	6.13	1	9610	160	0	9610	160	11003.2	594.833	702.167	dark grey massive clay gyttja	1	corr	lacustrine sediments	dark brown massive gyttja with macroscopic plant remains	dark grey massive silty sand	negative	5.12	n/a	n/a	nd	nd	nd	nd	0	0.1	0	0	0.09	0	0.3	0.01	0.1	0	0	0	nd	2008	81.93	MSL	midpoint	0.343802	0.343802	-0.313864
293	T-14029	Helle 2008, paper 3	2	Ljanes Hardangerfjorden; Oyjordsvatnet	60.2657	6.12	1	9545	105	0	9545	105	10881.3	298.667	300.333	brownish beige massive gyttja with rare wood remains	0	corr	piece of salix wood	dark brown massive gyttja	laminated gyttja clay	negative	2.57	n/a	n/a	nd	nd	nd	nd	0	0.1	0	0	0.09	0	0.3	0.01	0.1	0	0	0	nd	2008	72.83	MSL	midpoint	0.343802	0.343802	-0.306836
294	Tua-971	Helle et al. 2007	2	Vistevika; Store Stokkavann	58.9154	5.68	1	13490	75	0	13490	75	16262	251	243	marine silt	2	corr	marine shell	silty gyttja	marine sediments		n/a	n/a	n/a	nd	nd	nd	nd	0	0.1	0	0	0	0	0.3	0.01	0.1	0	0	0	nd	2007	11	MTL	midpoint	0.331813	0.331813	-0.384953
295	Tua-972a	Helle et al. 2007	2	Vistevika; Store Stokkavann	58.9154	5.68	1	12560	70	0	12560	70	13646	672	502	marine silt	2	corr	marine shell	silty gyttja	marine sediments		n/a	n/a	n/a	nd	nd	nd	nd	0	0.1	0	0	0	0	0.3	0.01	0.1	0	0	0	nd	2007	11	MTL	midpoint	0.331813	0.331813	-0.384953
296	Poz-6368	Lohne et al. 2007	2	Gardatjonn; core 505-121	60.2947	5.08667	1	9520	50	0	9520	50	10030.5	179.5	262.5	gyttja	0	corr	Leaf fragments; wood; moss stems	gyttja	silty gyttja	negative	1144.5 - 1147.5	nd	nd	russian corer	nd	nd	nd	nd	0.1	0	0	0	0	0.88698	0.01	0.1	0	1	0	0.015	NN1954	39.3	MTL	midpoint	1.34419	1.34419	-0.643937
297	Poz-6369	Lohne et al. 2007	2	Gardatjonn; core 505-121	60.2947	5.08667	1	9780	50	0	9780	50	11213.5	59.5	114.5	gyttja	0	corr	Leaf fragments; twig; wood	gyttja	silty gyttja	negative	1150.5 - 1152.5	nd	nd	russian corer	nd	nd	nd	nd	0.1	0	0	0	0	0.88698	0.01	0.1	0	1	0	0.015	NN1954	39.3	MTL	midpoint	1.34419	1.34419	-0.643937
298	Poz-6370	Lohne et al. 2007	2	Gardatjonn; core 505-121	60.2947	5.08667	1	9890	50	0	9890	50	11277	324	76	gyttja	0	corr	Leaves (3); leaf fragments; Racomitrium	gyttja	silty gyttja	negative	1153.5 - 1155.5	nd	nd	russian corer	nd	nd	nd	nd	0.1	0	0	0	0	0.88698	0.01	0.1	0	1	0	0.015	NN1954	39.3	MTL	midpoint	1.34419	1.34419	-0.643937
299	Poz-6371	Lohne et al. 2007	2	Gardatjonn; core 505-121	60.2947	5.08667	1	10080	50	0	10080	50	11537.2	285.833	184.167	gyttja	0	corr	Leaf fragments (S. herbacea)	gyttja	silty gyttja	negative	1155.5 - 1156.5	nd	nd	russian corer	nd	nd	nd	nd	0.1	0	0	0	0	0.88698	0.01	0.1	0	1	0	0.015	NN1954	39.3	MTL	midpoint	1.34419	1.34419	-0.643937
300	Poz-5130	Lohne et al. 2007	2	Gardatjonn; core 505-27	60.2947	5.08667	1	10040	50	0	10040	50	11560.5	247.5	238.5	gyttja	0	corr	S. herbacea leaves (3); leaf fragments	gyttja	silty gyttja	negative	1158.5 - 1159.5	nd	nd	russian corer	nd	nd	nd	nd	0.1	0	0	0	0	0.88698	0.01	0.1	0	1	0	0.015	NN1954	39.3	MTL	midpoint	1.34419	1.34419	-0.643937
301	Poz-5129	Lohne et al. 2007	2	Gardatjonn; core 505-121	60.2947	5.08667	1	10050	50	0	10050	50	11565.8	246.25	232.75	silty gyttja	0	corr	S. herbacea and S. polaris leaves; Racomitrium	gyttja	silty gyttja	negative	1159.5 - 1160.5	nd	nd	russian corer	nd	nd	nd	nd	0.1	0	0	0	0	0.88698	0.01	0.1	0	1	0	0.015	NN1954	39.3	MTL	midpoint	1.34419	1.34419	-0.643937
302	Poz-5185	Lohne et al. 2007	2	Gardatjonn; core 505-27	60.2947	5.08667	1	9980	50	0	9980	50	11472.3	221.667	214.333	silt clay	0	corr	S. herbacea leaves; leaf fragments	silty gyttja	silty clay	negative	1160.5 - 1161.5	nd	nd	russian corer	nd	nd	nd	nd	0.1	0	0	0	0	0.89321	0.01	0.1	0	1	0	0.015	NN1954	39.3	MTL	midpoint	1.3483	1.3483	-0.643937
303	Poz-5133	Lohne et al. 2007	2	Gardatjonn; core 505-27	60.2947	5.08667	1	10090	60	0	10090	60	11603.1	318.875	255.125	silt clay	0	corr	S. herbacea leaves	silty gyttja	silty clay	negative	1161.5 - 1162.5	nd	nd	russian corer	nd	nd	nd	nd	0.1	0	0	0	0	0.88698	0.01	0.1	0	1	0	0.015	NN1954	39.3	MTL	midpoint	1.34419	1.34419	-0.643937
304	Poz-5134	Lohne et al. 2007	2	Gardatjonn; core 505-27	60.2947	5.08667	1	10060	60	0	10060	60	11568	253	245	silt clay	0	corr	S. herbacea leaves (4); Racomitrium; leaf fragments	silty gyttja	silty clay	negative	1167.5 - 1168.5	nd	nd	russian corer	nd	nd	nd	nd	0.1	0	0	0	0	0.88698	0.01	0.1	0	1	0	0.015	NN1954	39.3	MTL	midpoint	1.34419	1.34419	-0.643937
305	Poz-5135	Lohne et al. 2007	2	Gardatjonn; core 505-27	60.2947	5.08667	1	10170	60	0	10170	60	11844.5	194.5	439.5	silt clay	0	corr	S. herbacea leaves (3); Racomitrium; leaf fragments	silty gyttja	silty clay	positive	1168.5 - 1169.5	nd	nd	russian corer	nd	nd	nd	nd	0.1	0	0	0	0	0.89321	0.01	0.1	0	1	0	0.015	NN1954	39.3	MTL	midpoint	1.3483	1.3483	-0.643937
306	Poz-6372	Lohne et al. 2007	2	Gardatjonn; core 505-27	60.2947	5.08667	1	10090	50	0	10090	50	11668.9	197.125	314.875	silt clay	0	corr	Twig; leaf fragments	silty gyttja	silty clay	positive	1169.5 - 1170.5	nd	nd	russian corer	nd	nd	nd	nd	0.1	0	0	0	0	0.88698	0.01	0.1	0	1	0	0.015	NN1954	39.3	MTL	midpoint	1.34419	1.34419	-0.643937
307	Poz-5136	Lohne et al. 2007	2	Gardatjonn; core 505-27	60.2947	5.08667	1	10270	50	0	10270	50	11942.2	509.75	124.25	silt clay	0	corr	Twigs (2); leaf fragments	silty gyttja	silty clay	positive	1171.5 - 1172.5	nd	nd	russian corer	nd	nd	nd	nd	0.1	0	0	0	0	0.88698	0.01	0.1	0	1	0	0.015	NN1954	39.3	MTL	midpoint	1.34419	1.34419	-0.643937
308	Poz-5184	Lohne et al. 2007	2	Gardatjonn; core 505-121	60.2947	5.08667	1	10940	60	0	10940	60	12829.5	227.5	79.5	silt clay	0	corr	Leaves and leaf fragment; Racomitrium	silty gyttja	silty clay	positive	1186.5 - 1187.5	nd	nd	russian corer	nd	nd	nd	nd	0.1	0	0	0	0	0.88698	0.01	0.1	0	1	0	0.015	NN1954	39.3	MTL	midpoint	1.34419	1.34419	-0.643937
309	Poz-5131	Lohne et al. 2007	2	Gardatjonn; core 505-121	60.2947	5.08667	1	10910	60	0	10910	60	12797.5	189.5	60.5	silty gyttja	0	corr	S. herbacea and S. polaris leaves; Racomitrium	silty clay	diamicton	positive	1187.5 - 1188.5	nd	nd	russian corer	nd	nd	nd	nd	0.1	0	0	0	0	0.88698	0.01	0.1	0	1	0	0.015	NN1954	39.3	MTL	midpoint	1.34419	1.34419	-0.643937
310	Poz-5132	Lohne et al. 2007	2	Gardatjonn; core 505-121	60.2947	5.08667	1	12130	60	0	12130	60	13974.8	172.25	167.75	silty gyttja	0	corr	Leaf fragments	silt clay	diamicton	positive	1199.5 - 1200.5	nd	nd	russian corer	nd	nd	nd	nd	0.1	0	0	0	0	0.88698	0.01	0.1	0	1	0	0.015	NN1954	39.3	MTL	midpoint	1.34419	1.34419	-0.643937
311	Poz-5137	Lohne et al. 2007	2	Gardatjonn; core 505-27	60.2947	5.08667	1	11720	60	0	11720	60	13558.8	191.25	92.75	silty gyttja	0	corr	Leaf fragments	silt clay	diamicton	positive	1201.5 - 1203.5	nd	nd	russian corer	nd	nd	nd	nd	0.1	0	0	0	0	0.88698	0.01	0.1	0	1	0	0.015	NN1954	39.3	MTL	midpoint	1.34419	1.34419	-0.643937
312	Poz-4811	Lohne et al. 2007	2	Hamravatn; core 505-19	60.2068	5.0855	1	10370	50	0	10370	50	12281.3	195.667	308.333	gyttja clayey silt	0	corr	S. herbacea; Racomitrium	gyttja silty sand	silty gyttja	positive	1278 - 1280	nd	nd	russian corer	nd	nd	nd	nd	0.1	0	0	0	0	0.791	0.01	0.1	0	1	0	0.015	NN1954	29.1	MTL	midpoint	1.28288	1.28288	-0.602161
313	Poz-4812	Lohne et al. 2007	2	Hamravatn; core 505-19	60.2068	5.0855	1	10820	60	0	10820	60	12748.5	133.5	40.5	gyttja sandy silt	0	corr	S. herbacea; Racomitrium; twig	gyttja silty sand	silty gyttja	positive	1285 - 1287	nd	nd	russian corer	nd	nd	nd	nd	0.1	0	0	0	0	0.791	0.01	0.1	0	1	0	0.015	NN1954	29.1	MTL	midpoint	1.28288	1.28288	-0.602161
314	Poz-4813	Lohne et al. 2007	2	Hamravatn; core 505-19	60.2068	5.0855	1	11080	60	0	11080	60	13005.5	96.5	164.5	gyttja sandy silt	0	corr	Bud scales (2); Racomitrium; twig	gyttja silty sand	silty gyttja	positive	1290 - 1292	nd	nd	russian corer	nd	nd	nd	nd	0.1	0	0	0	0	0.791197	0.01	0.1	0	1	0	0.015	NN1954	29.1	MTL	midpoint	1.283	1.283	-0.602161
315	Poz-4814	Lohne et al. 2007	2	Hamravatn; core 505-19	60.2068	5.0855	1	11070	50	0	11070	50	13003.2	92.75	158.25	silty gyttja	0	corr	S. polaris ; Racomitrium	gyttja clayey silt	clayey silt	positive	1292 - 1294	nd	nd	russian corer	nd	nd	nd	nd	0.1	0	0	0	0	0.791197	0.01	0.1	0	1	0	0.015	NN1954	29.1	MTL	midpoint	1.283	1.283	-0.602161
316	Poz-4815	Lohne et al. 2007	2	Hamravatn; core 505-19	60.2068	5.0855	1	11090	60	0	11090	60	13040	69	198	silty gyttja	0	corr	S. polaris; Polytricum; Racomitrium	gyttja sandy silt	clayey silt	negative	1294 - 1296	nd	nd	russian corer	nd	nd	nd	nd	0.1	0	0	0	0	0.791197	0.01	0.1	0	1	0	0.015	NN1954	29.1	MTL	midpoint	1.283	1.283	-0.602161
317	Poz-4817	Lohne et al. 2007	2	Hamravatn; core 505-19	60.2068	5.0855	1	12090	50	0	12090	50	13965	105	157	silty gyttja	0	corr	Racomitrium; Polytricum; twig	gyttja sandy silt	clayey silt	negative	1312 - 1314	nd	nd	russian corer	nd	nd	nd	nd	0.1	0	0	0	0	0.791197	0.01	0.1	0	1	0	0.015	NN1954	29.1	MTL	midpoint	1.283	1.283	-0.602161
318	Poz-4818	Lohne et al. 2007	2	Hamravatn; core 505-19	60.2068	5.0855	1	12270	60	0	12270	60	14166.5	639.5	116.5	clayey silt	0	corr	Leaf fragments; mosses	silty gyttja	clayey sandy silt	positive	1348 - 1350	nd	nd	russian corer	nd	nd	nd	nd	0.1	0	0	0	0	0.791	0.01	0.1	0	1	0	0.015	NN1954	29.1	MTL	midpoint	1.28288	1.28288	-0.602161
319	Poz-4908	Lohne et al. 2007	2	Sekkingstadtjonn; core 505-102	60.35	4.99433	1	10700	70	0	10700	70	12711	47	212	silty gyttja	0	corr	Dryas and S. herbacea leaves; Racomitrium	gyttja silt	gyttja silt	positive	1252.5-1253.5	nd	nd	russian corer	nd	nd	nd	nd	0.1	0	0	0	0	0.743	0.01	0.1	0	1	0	0.015	NN1954	24.3	MTL	midpoint	1.25385	1.25385	-0.680434
320	Poz-5095	Lohne et al. 2007	2	Sekkingstadtjonn; core 505-102	60.35	4.99433	1	11320	60	0	11320	60	13203	106	93	silty gyttja	0	corr	Racomitrium; bud scale; leaf fragments	gyttja silt	gyttja silt	positive	1292.5 - 1293.5	nd	nd	russian corer	nd	nd	nd	nd	0.1	0	0	0	0	0.74321	0.01	0.1	0	1	0	0.015	NN1954	24.3	MTL	midpoint	1.25398	1.25398	-0.680434
321	Poz-5096	Lohne et al. 2007	2	Sekkingstadtjonn; core 505-102	60.35	4.99433	1	11440	70	0	11440	70	13290.8	160.25	114.75	silty gyttja	0	corr	Racomitrium; Polytricum; leaf fragments	gyttja silt	gyttja silt	positive	1293.5 - 1294.5	nd	nd	russian corer	nd	nd	nd	nd	0.1	0	0	0	0	0.74321	0.01	0.1	0	1	0	0.015	NN1954	24.3	MTL	midpoint	1.25398	1.25398	-0.680434
322	Poz-4909	Lohne et al. 2007	2	Sekkingstadtjonn; core 505-102	60.35	4.99433	1	11310	70	0	11310	70	13164.2	146.75	65.25	silty gyttja	0	corr	S. herbacea leaves; twigs; Racomitrium, Polytricum	gyttja silt	gyttja silt	positive	1294.5 - 1295.5	nd	nd	russian corer	nd	nd	nd	nd	0.1	0	0	0	0	0.74321	0.01	0.1	0	1	0	0.015	NN1954	24.3	MTL	midpoint	1.25398	1.25398	-0.680434
323	Poz-4910	Lohne et al. 2007	2	Sekkingstadtjonn; core 505-102	60.35	4.99433	1	11310	60	0	11310	60	13164.8	139.25	57.75	silty gyttja	0	corr	Racomitrium; fragments of S. herbacea leaves	gyttja silt	gyttja silt	positive	1295.5 - 1296.5	nd	nd	russian corer	nd	nd	nd	nd	0.1	0	0	0	0	0.74321	0.01	0.1	0	1	0	0.015	NN1954	24.3	MTL	midpoint	1.25398	1.25398	-0.680434
324	Poz-4911	Lohne et al. 2007	2	Sekkingstadtjonn; core 505-102	60.35	4.99433	1	11450	60	0	11450	60	13326.2	126.833	145.167	silty gyttja	0	corr	S. herbacea leaves (4); Racomitrium; leaf fragments	gyttja silt	gyttja silt	positive	1296.5 - 1297.5	nd	nd	russian corer	nd	nd	nd	nd	0.1	0	0	0	0	0.74321	0.01	0.1	0	1	0	0.015	NN1954	24.3	MTL	midpoint	1.25398	1.25398	-0.680434
325	Poz-4912	Lohne et al. 2007	2	Sekkingstadtjonn; core 505-102	60.35	4.99433	1	11430	60	0	11430	60	13287.2	146.75	111.25	silty gyttja	0	corr	Racomitrium; S. herbacea leaves; leaf fragments	gyttja silt	gyttja silt	negative	1297.5 - 1298.5	nd	nd	russian corer	nd	nd	nd	nd	0.1	0	0	0	0	0.74321	0.01	0.1	0	1	0	0.015	NN1954	24.3	MTL	midpoint	1.25398	1.25398	-0.680434
326	Poz-4819	Lohne et al. 2007	2	Sekkingstadtjonn; core 505-102	60.35	4.99433	1	11310	60	0	11310	60	13164.8	139.25	57.75	silty gyttja	0	corr	Racomitrium; Polytricum; leaf fragments	gyttja silt	gyttja silt	negative	1298.5 - 1299.5	nd	nd	russian corer	nd	nd	nd	nd	0.1	0	0	0	0	0.74321	0.01	0.1	0	1	0	0.015	NN1954	24.3	MTL	midpoint	1.25398	1.25398	-0.680434
327	Poz-4914	Lohne et al. 2007	2	Sekkingstadtjonn; core 505-102	60.35	4.99433	1	11470	60	0	11470	60	13363.8	102.25	178.75	silty gyttja	0	corr	Racomitrium; S. herbacea leaf; leaf fragments	gyttja silt	gyttja silt	negative	1299.5 - 1300.5	nd	nd	russian corer	nd	nd	nd	nd	0.1	0	0	0	0	0.74321	0.01	0.1	0	1	0	0.015	NN1954	24.3	MTL	midpoint	1.25398	1.25398	-0.680434
328	Poz-4915	Lohne et al. 2007	2	Sekkingstadtjonn; core 505-102	60.35	4.99433	1	11560	60	0	11560	60	13403.5	170.5	92.5	silty gyttja	0	corr	Racomitrium; leaf fragments	gyttja silt	gyttja silt	negative	1300.5 - 1301.5	nd	nd	russian corer	nd	nd	nd	nd	0.1	0	0	0	0	0.74321	0.01	0.1	0	1	0	0.015	NN1954	24.3	MTL	midpoint	1.25398	1.25398	-0.680434
329	Poz-4821	Lohne et al. 2007	2	Sekkingstadtjonn; core 505-102	60.35	4.99433	1	11720	60	0	11720	60	13558.8	191.25	92.75	silty gyttja	0	corr	Racomitrium; Polytricum; leaf fragments	gyttja silt	gyttja silt	negative	1301.5 - 1302.5	nd	nd	russian corer	nd	nd	nd	nd	0.1	0	0	0	0	0.74321	0.01	0.1	0	1	0	0.015	NN1954	24.3	MTL	midpoint	1.25398	1.25398	-0.680434
330	Poz-4922	Lohne et al. 2007	2	Sekkingstadtjonn; core 505-102	60.35	4.99433	1	11830	60	0	11830	60	13667.2	127.75	151.25	silty gyttja	0	corr	Racomitrium; Polytricum; leaf stem	gyttja silt	gyttja silt	negative	1302.5 - 1303.5	nd	nd	russian corer	nd	nd	nd	nd	0.1	0	0	0	0	0.74321	0.01	0.1	0	1	0	0.015	NN1954	24.3	MTL	midpoint	1.25398	1.25398	-0.680434
331	Poz-4823	Lohne et al. 2007	2	Sekkingstadtjonn; core 505-102	60.35	4.99433	1	12040	60	0	12040	60	13905.8	144.25	109.75	gyttja silt	0	corr	Racomitrium; leaf fragments	silt gyttja	nd	negative	1319.5 - 1321.5	nd	nd	russian corer	nd	nd	nd	nd	0.1	0	0	0	0	0.743	0.01	0.1	0	1	0	0.015	NN1954	24.3	MTL	midpoint	1.25385	1.25385	-0.680434
332	T-3303B	Prosch-Danielsen 2006	2	Rogaland; Randaberg Halandsvannet	58.9748	5.6285	1	3400	290	0	3400	290	3802.75	705.25	923.75	brackish	1	corr	algae gyttja	lacustrine gyttja	sand-gravel	positive	3.6	n/a	n/a	nd	nd	nd	nd	0	0.1	0	0	0	0	0.5	0.01	0.1	0	1	0	nd	2006	7	MTL	midpoint	1.12699	1.12699	-0.314502
333	B-171188	Prosch-Danielsen 2006	2	Rogaland; Randaberg Halandsvannet	58.9748	5.6285	1	5600	80	0	5600	80	6425.25	299.75	408.25	marine	1	corr	fine detritus gyttja	algae gyttja	sand-gravel	negative	3.9	n/a	n/a	nd	nd	nd	nd	0	0.1	0	0	0	0	0.5	0.01	0.1	0	1	0	nd	2006	7	MTL	midpoint	1.12699	1.12699	-0.314502
334	B-171189	Prosch-Danielsen 2006	2	Rogaland; Randaberg Halandsvannet	58.9748	5.6285	1	6560	40	0	6560	40	7509.25	144.75	248.25	marine brackish	1	corr	Algae gyttja	sand-gravel	sand-gravel	positive	4.1	n/a	n/a	nd	nd	nd	nd	0	0.1	0	0	0	0	0.5	0.01	0.1	0	1	0	nd	2006	7	MTL	midpoint	1.12699	1.12699	-0.314502
335	T-3302B	Prosch-Danielsen 2006	2	Rogaland; Randaberg Halandsvannet	58.9748	5.6285	1	6580	110	0	6580	110	7434	265	268	marine brackish	1	corr	Algae gyttja	sand-gravel	sand	positive	4.3	n/a	n/a	nd	nd	nd	nd	0	0.1	0	0	0	0	0.5	0.01	0.1	0	1	0	nd	2006	7	MTL	midpoint	1.12699	1.12699	-0.314502
336	B-171190	Prosch-Danielsen 2006	2	Rogaland; Randaberg Halandsvannet	58.9748	5.6285	1	6330	40	0	6330	40	7243	186	281	marine brackish	1	corr	Algae gyttja	sand-gravel	sand	positive	4.4	n/a	n/a	nd	nd	nd	nd	0	0.1	0	0	0	0	0.5	0.01	0.1	0	1	0	nd	2006	7	MTL	midpoint	1.12699	1.12699	-0.314502
337	B-171191	Prosch-Danielsen 2006	2	Rogaland; Randaberg Halandsvannet	58.9748	5.6285	1	8170	80	0	8170	80	9149.5	310.5	491.5	lacustrine	1	corr	fine detritus gyttja	sand-gravel	algae gyttja	positive	4.5	n/a	n/a	nd	nd	nd	nd	0	0.1	0	0	0	0	0.5	0.01	0.1	0	1	0	nd	2006	7	MTL	midpoint	1.12699	1.12699	-0.314502
338	T-7566A	Prosch-Danielsen 2006	2	Jaeren; Sele-Bybergsletten olstervatn	58.8164	5.57301	1	12920	260	0	12920	260	15448	800	1127	glaciofluvial sediment	1	corr	bulk gyttja	marine sand	nd	positive	3.2	n/a	n/a	nd	nd	nd	nd	0	0.1	0	0	0	0	0.5	0.01	0.1	0	1	0	nd	2006	5.6	MTL	midpoint	1.12699	1.12699	-0.245278
339	T-7567A	Prosch-Danielsen 2006	2	Jaeren; Sele-Bybergsletten olstervatn	58.8164	5.57301	1	11370	90	0	11370	90	13243	331	236	glaciofluvial sediment	1	corr	bulk gyttja	marine sand	nd	positive	3.2	n/a	n/a	nd	nd	nd	nd	0	0.1	0	0	0	0	0.5	0.01	0.1	0	1	0	nd	2006	5.6	MTL	midpoint	1.12699	1.12699	-0.245278
340	T-7565A	Prosch-Danielsen 2006	2	Jaeren; Sele-Bybergsletten olstervatn	58.8164	5.57301	1	10160	220	0	10160	220	11730.7	931.333	538.667	glaciofluvial sediment	1	corr	bulk gyttja	lacustrine gyttja with sand	marine sand	positive	nd	n/a	n/a	nd	nd	nd	nd	0	0.1	0	0	0	0	0.5	0.01	0.1	0	1	0	nd	2006	4.5	MTL	midpoint	1.12699	1.12699	-0.245278
341	T-7563A	Prosch-Danielsen 2006	2	Jaeren; Sele-Bybergsletten tangarvatn	58.8168	5.55676	1	11710	240	0	11710	240	13596	627	513	gyttja	1	corr	bulk gyttja	rounded pebbles and gravel	cobbles	nd	7.5	0.4	0	nd	0.4	measured	1	0.5	0.01	0.05	0.15	0	0	0.5	0.01	0.1	0	1	0	nd	2006	0.5	MTL	midpoint	1.23903	1.22992	-0.24233
342	T-7563B	Prosch-Danielsen 2006	2	Jaeren; Sele-Bybergsletten tangarvatn	58.8168	5.55676	1	12110	300	0	12110	300	14023.4	1126.62	666.375	gyttja	1	corr	bulk gyttja	rounded pebbles and gravel	cobbles	nd	7.5	0.4	0	nd	0.4	measured	1	0.5	0.01	0.05	0.15	0	0	0.5	0.01	0.1	0	1	0	nd	2006	0.5	MTL	midpoint	1.23903	1.22992	-0.24233
343	T-7562B	Prosch-Danielsen 2006	2	Jaeren; Sele-Bybergsletten tangarvatn	58.8168	5.55676	1	11990	230	0	11990	230	13734.8	1109.17	386.833	beach ridge sequence	1	corr	hummus	beach ridge sequence	cobbles	nd	7.5	0.6	0	nd	0.4	measured	1	0.5	0.01	0.05	0.15	0	0	0.5	0.01	0.1	0	1	0	nd	2006	1.35	MTL	midpoint	1.23903	1.22992	-0.24233
344	T-1717	Prosch-Danielsen 2006	2	Jaeren; Sore Eigeroy Vodlamyr	58.4269	5.89478	1	7050	140	0	7050	140	7817.75	459.25	245.75	gyttja	1	corr	bulk gyttja	magno carecetum peat	fine detritus gyttja	positive	1	1.5	nd	nd	0.25	nd	nd	0	0.1	0	0	0	0	0.5	0.01	0.1	0	1	0	nd	2001	4	MTL	midpoint	1.12699	1.12699	-0.0901568
345	T-7424	Prosch-Danielsen 2006	2	Jaeren; Sele-Bybergsletten; Saltebukta	58.6899	5.56341	1	6750	90	0	6750	90	7618	157	187	littoral sediment	0	corr	bulk shells	coarse sand	gravel	positive	2	nd	nd	nd	nd	nd	nd	0.2	0.1	0	0	0	0	0.5	0.01	0.1	0	1	0	nd	2001	5.5	MTL	midpoint	1.1446	1.1446	-0.173327
346	Tua-3242	Bondevik et al. 2006	2	Sotra; kvaltjern	60.4233	4.98	1	9315	70	0	9315	70	10539	154	256	lacustrine sediments	0	corr	twigs	lacustrine sediments	marine sand	negative	n/a	n/a	n/a	nd	nd	nd	nd	0	0.1	0	0	0	0	0.698224	0.01	0.1	0	1	0	nd	2006	17.8	MTL	midpoint	1.22785	1.22785	-0.71101
347	Beta-154058	bakke et al. 2005	2	Troms; Aspvatn	69.7501	19.9607	1	5830	40	0	5830	40	6651	240	333	lacustrine sediments	1		Gyttja	n/a	n/a	n/a	66-65	n/a	n/a	nd	nd	nd	nd	nd	0.1	0	0	0	0	0.85	0.01	0.1	0	1	0	nd	2005	35	MTL	midpoint	1.32008	1.32008	-1.36817
348	T-8987	bakke et al. 2005	2	Troms; Aspvatn	69.7501	19.9607	1	4220	45	0	4220	45	4736	124	207	lacustrine sediments	0		Macrofossil	Lacustrine sediments	flood sediments	negative	75.5	n/a	n/a	nd	nd	nd	nd	nd	0.1	0	0	0	0	0.836749	0.01	0.1	0	1	0	nd	2005	35	MTL	midpoint	1.31158	1.31158	-1.36817
349	Beta-154059	bakke et al. 2005	2	Troms; Aspvatn	69.7501	19.9607	1	7420	50	0	7420	50	8158.25	248.75	180.25	lacustrine sediments	1		Gyttja	n/a	n/a	n/a	100-99	n/a	n/a	nd	nd	nd	nd	nd	0.1	0	0	0	0	0.85	0.01	0.1	0	1	0	nd	2005	35	MTL	midpoint	1.32008	1.32008	-1.36817
350	Beta-154060	bakke et al. 2005	2	Troms; Aspvatn	69.7501	19.9607	1	9210	40	0	9210	40	10402.8	297.25	433.75	lacustrine sediments	1		Gyttja	n/a	n/a	n/a	136-135	n/a	n/a	nd	nd	nd	nd	nd	0.1	0	0	0	0	0.85	0.01	0.1	0	1	0	nd	2005	35	MTL	midpoint	1.32008	1.32008	-1.36817
351	Beta-154061	bakke et al. 2005	2	Troms; Aspvatn	69.7501	19.9607	1	10160	40	0	10160	40	11655.8	783.167	388.833	lacustrine sediments	1		Gyttja	n/a	n/a	n/a	182-180	n/a	n/a	nd	nd	nd	nd	nd	0.1	0	0	0	0	0.85	0.01	0.1	0	1	0	nd	2005	35	MTL	midpoint	1.32008	1.32008	-1.36817
352	Beta-154827	bakke et al. 2005	2	Troms; Aspvatn	69.7501	19.9607	1	8010	40	0	8010	40	8905.62	104.375	264.625	lacustrine sediments	0		Macrofossil (wood)	Lacustrine sediments	flood sediments	negative	182-180	n/a	n/a	nd	nd	nd	nd	nd	0.1	0	0	0	0	0.836749	0.01	0.1	0	1	0	nd	2005	35	MTL	midpoint	1.31158	1.31158	-1.36817
353	Beta-154062	bakke et al. 2005	2	Troms; Aspvatn	69.7501	19.9607	1	11070	50	0	11070	50	12991.5	168.5	236.5	lacustrine sediments	1		Gyttja	n/a	n/a	n/a	211-210	n/a	n/a	nd	nd	nd	nd	nd	0.1	0	0	0	0	0.85	0.01	0.1	0	1	0	nd	2005	35	MTL	midpoint	1.32008	1.32008	-1.36817
354	Beta-154063	bakke et al. 2005	2	Troms; Aspvatn	69.7501	19.9607	1	10050	40	0	10050	40	11521.5	415.5	285.5	lacustrine sediments	1		Gyttja (macro)	n/a	n/a	n/a	245	n/a	n/a	nd	nd	nd	nd	nd	0.1	0	0	0	0	0.85	0.01	0.1	0	1	0	nd	2005	35	MTL	midpoint	1.32008	1.32008	-1.36817
355	Beta-154064	bakke et al. 2005	2	Troms; Aspvatn	69.7501	19.9607	1	9220	80	marine	9220	80	10404	238	202	marine sediments	2		Shell	n/a	n/a	n/a	295	n/a	n/a	nd	nd	nd	nd	nd	0.1	0	0	0	0	0.850215	0.01	0.1	0	1	0	nd	2005	35	MTL	midpoint	1.32021	1.32021	-1.36817
356	Beta-154065	bakke et al. 2005	2	Troms; Aspvatn	69.7501	19.9607	1	9710	90	marine	9710	90	10269	311	349	marine sediments	2		Shell	Lacustrine sediments	flood sediments	negative	480-478	n/a	n/a	nd	nd	nd	nd	nd	0.1	0	0	0	0	0.85	0.01	0.1	0	1	0	nd	2005	35	MTL	midpoint	1.32008	1.32008	-1.36817
357	T-6088B	Simonsen 2005 (as in Prosch-Danielsen 2006)	2	Jaeren; Sore Eigeroy P Gunnarsto	58.4262	5.95224	1	9720	100	0	9720	100	10297.5	339.5	301.5	coarse sand with twigs	0	corr	twigs	marine sediments	marine sediments	negative	1.1	nd	nd	nd	0.25	nd	nd	0	0.1	0	0	0	0	0.5	0.01	0.1	0	1	0	nd	2001	-3	MTL	midpoint	1.12699	1.12699	-0.0836416
358	T-6088A	Simonsen 2005 (as in Prosch-Danielsen 2006)	2	Jaeren; Sore Eigeroy P Gunnarsto	58.4262	5.95224	1	9520	100	0	9520	100	10909.4	264.625	337.375	coarse sand with twigs	0	corr	twigs	marine sediments	marine sediments	negative	1.1	nd	nd	nd	0.25	nd	nd	0	0.1	0	0	0	0	0.5	0.01	0.1	0	1	0	nd	2001	-3	MTL	midpoint	1.12699	1.12699	-0.0836416
359	T-6089	Simonsen 2005 (as in Prosch-Danielsen 2006)	2	Jaeren; Sore Eigeroy P Gunnarsto	58.4262	5.95224	1	9240	120	0	9240	120	10363.5	366.5	171.5	coarse sand with twigs	0	corr	twigs	marine sediments	marine sediments	negative	1.1	nd	nd	nd	0.25	nd	nd	0	0.1	0	0	0	0	0.5	0.01	0.1	0	1	0	nd	2001	-3	MTL	midpoint	1.12699	1.12699	-0.0836416
360	T-6090	Simonsen 2005 (as in Prosch-Danielsen 2006)	2	Jaeren; Sore Eigeroy P Gunnarsto	58.4262	5.95224	1	7990	120	0	7990	120	8806.25	455.75	263.25	coarse sand with twigs	0	corr	twigs	marine sediments	marine sediments	positive	1.1	nd	nd	nd	0.25	nd	nd	0	0.1	0	0	0	0	0.5	0.01	0.1	0	1	0	nd	2001	-3	MTL	midpoint	1.12699	1.12699	-0.0836416
361	Beta-136898	Lohne 2004		Os Hordaland; Grindavoll	60.1732	5.42	1	12190	50	0	12190	50	14085	224	206	sandy silt	0	corr	Terrestrial plant material: mosses. Leaves of Salix polaris; leaf fragments	gyttja silt	sandy silt	positive	505-18: 588.5–590.5		n/a	nd	nd	nd	nd	0	0.05	0	0	0	0	0.787026	0.01	0.1	0	1	0	nd	2004	58	MTL	midpoint	1.2775	1.2775	-0.650837
362	TUa-3270	Lohne 2004		Os Hordaland; Grindavoll	60.1732	5.42	1	11955	80	0	11955	80	13889.8	148.25	281.75	gyttja silt	0	corr	Terrestrial plant material: leaves of Salix herbacea; S. polaris; Dryas; leaf fragments. Mosses (Polytricum)	silty gyttja	sandy silt	positive	505-17: 581–583		n/a	nd	nd	nd	nd	0	0.05	0	0	0	0	0.787026	0.01	0.1	0	1	0	nd	2004	58	MTL	midpoint	1.2775	1.2775	-0.650837
363	Beta-136897	Lohne 2004		Os Hordaland; Grindavoll	60.1732	5.42	1	11180	40	0	11180	40	13126	46	120	gyttja silt	0	corr	Terrestrial plant material: leaves of Salix herbacea; S. polaris; Dryas. Mosses. Bud scale	silty gytja	gyttja silt	posittive	505-16: 575–577		n/a	nd	nd	nd	nd	0	0.05	0	0	0	0	0.787026	0.01	0.1	0	1	0	nd	2004	58	MTL	midpoint	1.2775	1.2775	-0.650837
364	Beta-136896	Lohne 2004		Os Hordaland; Grindavoll	60.1732	5.42	1	10050	40	0	10050	40	11564.2	241.8	218.2	silty gyttja	0	corr	Terrestrial plant material: leaves of Salix herbacea; S. polaris; leaf fragments	gyttja silt	silty gyttja	positive	505-16: 561–562		n/a	nd	nd	nd	nd	0	0.05	0	0	0	0	0.79014	0.01	0.1	0	1	0	nd	2004	58	MTL	midpoint	1.27942	1.27942	-0.650837
365	Beta-136895	Lohne 2004		Os Hordaland; Grindavoll	60.1732	5.42	1	9970	40	0	9970	40	11398	287	140	gyttja silt	0	corr	Terrestrial plant material: leaves of Salix herbacea; S. polaris; Betula nana; Dryas; leaf fragments. Catkin (Betula); mosses; bud scale	gyttja	silty gyttja	negative	505-16: 551–552		n/a	nd	nd	nd	nd	0	0.05	0	0	0	0	0.79014	0.01	0.1	0	1	0	nd	2004	58	MTL	midpoint	1.27942	1.27942	-0.650837
366	TUa-3269	Lohne 2004		Os Hordaland; Grindavoll	60.1732	5.42	1	9660	50	0	9660	50	11016.5	184.5	232.5	gyttja	0	corr	Terrestrial plant material: leaves of Salix herbacea; Dryas; leaf fragments. Fruits (Betula). Mosses (Racomitrium); twigs; catkin (Betula)	gyttja	gyttja silt	negative	505-16: 548.5–549.5		n/a	nd	nd	nd	nd	0	0.05	0	0	0	0	0.787026	0.01	0.1	0	1	0	nd	2004	58	MTL	midpoint	1.2775	1.2775	-0.650837
367	TUa-3205	Lohne 2004		Os Hordaland; Grindavoll	60.1732	5.42	1	9455	60	0	9455	60	10650.8	418.25	138.75	gyttja	0	corr	Terrestrial plant material: leaves of Salix herbacea; leaf fragments. Mosses (Racomitrium)	gyttja	gyttja silt	negative	505-16: 542.5–543.5		n/a	nd	nd	nd	nd	0	0.05	0	0	0	0	0.787026	0.01	0.1	0	1	0	nd	2004	58	MTL	midpoint	1.2775	1.2775	-0.650837
368	TUa-2180	Lohne 2004		Os Hordaland; Langevatnet	60.1969	5.39	1	12505	95	380	12505	95	14756.8	372.25	487.75	sandy clayey silt	2	corr	marine mussels: fragment of probably Mytilus edulis. Broken during core sampling	gyttja silt	clayey silt	negative	V: 577–581		n/a	nd	nd	nd	nd	0	0.05	0	0	0	0	0.7515	0.01	0.1	0	1	0	nd	2004	50.3	MTL	midpoint	1.25593	1.25593	-0.639938
369	TUa-2173	Lohne 2004		Os Hordaland; Langevatnet	60.1969	5.39	1	12390	95	0	12390	95	13315	599	276	gyttja silt	0	corr	Terrestrial plant material: leaves of Salix polaris; S. cf. glauca. Mosses (Racomitrium; Calliergon); fruit (Oxyria digyna )	gyttja silt	clayey silt	positive	505-02: 2255–2256		n/a	nd	nd	nd	nd	0	0.05	0	0	0	0	0.751633	0.01	0.1	0	1	0	nd	2004	50.3	MTL	midpoint	1.25601	1.25601	-0.639938
370	TUa-3204	Lohne 2004		Os Hordaland; Langevatnet	60.1969	5.39	1	11990	75	0	11990	75	13896.8	160.25	282.75	gyttja silt	0	corr	Terrestrial plant material: leaves of Salix polaris; Dryas; leaf fragments. Mosses (Polytricum; Racomitrium); twigs	silty gyttja	clayey silt	positive	505-02: 2247.5–2248.5		n/a	nd	nd	nd	nd	0	0.05	0	0	0	0	0.997134	0.01	0.1	0	1	0	nd	2004	50.3	MTL	midpoint	1.41664	1.41664	-0.639938
371	TUa-3267	Lohne 2004		Os Hordaland; Langevatnet	60.1969	5.39	1	11835	60	0	11835	60	13667.9	129.125	151.875	silty gytja	0	corr	Terrestrial plant material: leaves of Salix polaris; Dryas; leaf fragments. Mosses (Polytricum; Racomitrium); twigs; fruits (Betula); bud scale.	silty gyttja	gyttja silt	positive	505-02: 2240.5–2242.5		n/a	nd	nd	nd	nd	0	0.05	0	0	0	0	0.997134	0.01	0.1	0	1	0	nd	2004	50.3	MTL	midpoint	1.41664	1.41664	-0.639938
372	TUa-2174	Lohne 2004		Os Hordaland; Langevatnet	60.1969	5.39	1	11305	80	0	11305	80	13164.2	166.75	73.25	silty gyttja	0	corr	Terrestrial plant material: leaves of Salix herbacea and Dryas. Mosses (Racomitrium; Pohlia); fruits (Carex; Oxyria digyna)	silty gyttja	gyttja silt	positive	505-02: 2230–2231		n/a	nd	nd	nd	nd	0	0.05	0	0	0	0	0.997134	0.01	0.1	0	1	0	nd	2004	50.3	MTL	midpoint	1.41664	1.41664	-0.639938
373	TUa-2175	Lohne 2004		Os Hordaland; Langevatnet	60.1969	5.39	1	10760	100	0	10760	100	12723.5	183.5	232.5	silty gyttja	0	corr	Terrestrial plant material: leaves and bud scales of Salix herbacea. Mosses (Racomitrium; Pohlia; Calliergon and Polytrichum); fruit (Oxyria digyna)	silty gyttja	gyttja silt	positive	505-02: 2209.5–2210.5		n/a	nd	nd	nd	nd	0	0.05	0	0	0	0	0.751633	0.01	0.1	0	1	0	nd	2004	50.3	MTL	midpoint	1.25601	1.25601	-0.639938
374	TUa-2176	Lohne 2004		Os Hordaland; Langevatnet	60.1969	5.39	1	10175	120	0	10175	120	11744.6	716.375	420.625	silty gyttja	0	corr	Terrestrial plant material: leaves—Salix herbacea; S. cf. glauca; Dryas; Empetrum and possibly Fabaceae. Mosses (Racomitrium; Hylocomium; Pohlia; Dicranum and Ditrichum); fruit (Dryas)	silty gyttja	gyttja silt	negative	505-02: 2137–2138		n/a	nd	nd	nd	nd	0	0.05	0	0	0	0	0.751633	0.01	0.1	0	1	0	nd	2004	50.3	MTL	midpoint	1.25601	1.25601	-0.639938
375	TUa-3266	Lohne 2004		Os Hordaland; Langevatnet	60.1969	5.39	1	10000	70	0	10000	70	11447.9	352.125	191.875	silty gyttja	0	corr	Terrestrial plant material: leaves—Dryas; leaf fragments. Mosses (Polytrichum; Racomitrium; Hylocomium); fruits (Betula)	silty gyttja	gyttja silt	negative	505-02: 2135.5–2134.5		n/a	nd	nd	nd	nd	0	0.05	0	0	0	0	0.751633	0.01	0.1	0	1	0	nd	2004	50.3	MTL	midpoint	1.25601	1.25601	-0.639938
376	TUa-2177	Lohne 2004		Os Hordaland; Langevatnet	60.1969	5.39	1	9655	110	0	9655	110	10956.7	292.333	268.667	silty gyttja	0	corr	Terrestrial plant material: leaf of Dryas. Mosses (Racomitrium and Hylocomium); fruit (Betula; Asteraceae)	silty gyttja	gyttja silt	negative	505-02: 2132–2133		n/a	nd	nd	nd	nd	0	0.05	0	0	0	0	0.997134	0.01	0.1	0	1	0	nd	2004	50.3	MTL	midpoint	1.41664	1.41664	-0.639938
377	TUa-2178	Lohne 2004		Os Hordaland; Langevatnet	60.1969	5.39	1	9825	110	0	9825	110	11320.5	375.5	526.5	silty gyttja	0	corr	Terrestrial plant material: leaf and fruits of Betula. Mosses (Racomitrium and Hylocomium); needle (Juniperus)	silty gyttja	gyttja silt	negative	505-02: 2127–2128		n/a	nd	nd	nd	nd	0	0.05	0	0	0	0	0.997134	0.01	0.1	0	1	0	nd	2004	50.3	MTL	midpoint	1.41664	1.41664	-0.639938
378	T-14130A	Lohne 2004		Os Hordaland; Langevatnet	60.1969	5.39	1	9565	65	0	9565	65	10910	293	335	silty gyttja	1	corr	NaOH-soluble organic matter	gyttja	gyttja silt	negative	505-02: 2125–2127		n/a	nd	nd	nd	nd	0	0.05	0	0	0	0	0.997134	0.01	0.1	0	1	0	nd	2004	50.3	MTL	midpoint	1.41664	1.41664	-0.639938
379	T-14131A	Lohne 2004		Os Hordaland; Langevatnet	60.1969	5.39	1	9245	50	0	9245	50	10363	339	154	gyttja	1	corr	NaOH-soluble organic matter	gyttja	silty gyttja	negative	505-02: 2111–2113		n/a	nd	nd	nd	nd	0	0.05	0	0	0	0	0.997134	0.01	0.1	0	1	0	nd	2004	50.3	MTL	midpoint	1.41664	1.41664	-0.639938
380	T-14132A	Lohne 2004		Os Hordaland; Langevatnet	60.1969	5.39	1	9015	75	0	9015	75	10031	462	322	gyttja	1	corr	NaOH-soluble organic matter	gyttja	silty gyttja	negative	505-02: 2095–2097		n/a	nd	nd	nd	nd	0	0.05	0	0	0	0	0.997134	0.01	0.1	0	1	0	nd	2004	50.3	MTL	midpoint	1.41664	1.41664	-0.639938
381	Beta-175335	Lohne 2004		Os Hordaland; Særvikmyra	60.2271	5.33	1	12330	160	380	12330	160	14528.8	534.25	664.75	sandy gyttja silt	2	corr	marine mussels: Fragment of probably Mytilus edulis	silty gyttja	sandy gyttja silt	negative	02-151: 792–791		n/a	nd	nd	nd	nd	0	0.05	0	0	0	0	0.94	0.01	0.1	0	1	0	nd	2004	44	MTL	midpoint	1.37703	1.37703	-0.624525
382	TUa-4139	Lohne 2004		Os Hordaland; Særvikmyra	60.2271	5.33	1	11830	70	380	11830	70	13008	180	231	silty gyttja	2	corr	marine mussels: Fragment of probably Mytilus edulis	sandy gyttja silt	sandy gyttja silt	negative	02-151: 792–791		n/a	nd	nd	nd	nd	0	0.05	0	0	0	0	0.94	0.01	0.1	0	1	0	nd	2004	44	MTL	midpoint	1.37703	1.37703	-0.624525
383	Beta-175334	Lohne 2004		Os Hordaland; Særvikmyra	60.2271	5.33	1	11650	40	0	11650	40	12810.5	196.5	125.5	silty gyttja	0	corr	Terrestrial plant material: Leaf fragments. Mosses (Racomitrium)	sandy gyttja silt	sandy gyttja silt	negative	02-151: 761–758		n/a	nd	nd	nd	nd	0	0.05	0	0	0	0	0.94	0.01	0.1	0	1	0	nd	2004	44	MTL	midpoint	1.37703	1.37703	-0.624525
384	Beta-175333	Lohne 2004		Os Hordaland; Særvikmyra	60.2271	5.33	1	11560	40	0	11560	40	13404	93	80	sandy gyttja silt	0	corr	Terrestrial plant material: Leaf fragments of Salix herbacea. Twigs and wood	silty gyttja	silty gyttja	negative	02-151: 756–755		n/a	nd	nd	nd	nd	0	0.05	0	0	0	0	0.940248	0.01	0.1	0	1	0	nd	2004	44	MTL	midpoint	1.3772	1.3772	-0.624525
385	Beta-175332	Lohne 2004		Os Hordaland; Særvikmyra	60.2271	5.33	1	11510	40	0	11510	40	13375.5	88.5	68.5	silty gyttja	0	corr	Terrestrial plant material: Leaf fragments. Mosses (Racomitrium; Polytricum); wood	gyttja silt	sandy gyttja silt	positive	02-151: 755–754		n/a	nd	nd	nd	nd	0	0.05	0	0	0	0	0.940248	0.01	0.1	0	1	0	nd	2004	44	MTL	midpoint	1.3772	1.3772	-0.624525
386	Poz-2899	Lohne 2004		Os Hordaland; Særvikmyra	60.2271	5.33	1	10980	50	0	10980	50	12915.5	148.5	150.5	gyttja siilt	0	corr	Terrestrial plant material: Leaves and leaf fragments of Salix herbacea. Mosses (Polytricum); twigs	gyttja silt	silty gyttja	positive	02-151: 755–754		n/a	nd	nd	nd	nd	0	0.05	0	0	0	0	0.940248	0.01	0.1	0	1	0	nd	2004	44	MTL	midpoint	1.3772	1.3772	-0.624525
387	Poz-2898	Lohne 2004		Os Hordaland; Særvikmyra	60.2271	5.33	1	10590	40	0	10590	40	12647.5	61.5	157.5	gyttja silt	0	corr	Terrestrial plant material: Leaves and leaf fragments of Salix herbacea and S. polaris. Mosses (Polytricum); twigs	gyttja	gyttja silt	positive	02-151: 739.5–740.5		n/a	nd	nd	nd	nd	0	0.05	0	0	0	0	0.94	0.01	0.1	0	1	0	nd	2004	44	MTL	midpoint	1.37703	1.37703	-0.624525
388	Beta-175336	Lohne 2004		Os Hordaland; Særvikmyra	60.2271	5.33	1	9820	40	0	9820	40	11228.5	82.5	47.5	gyttja	0	corr	Terrestrial plant material: Leaves of Salix herbacea. Mosses (Polytricum); bud scale	gyttja	gyttja silt	negative	02-152: 645–644		n/a	nd	nd	nd	nd	0	0.05	0	0	0	0	0.940248	0.01	0.1	0	1	0	nd	2004	44	MTL	midpoint	1.3772	1.3772	-0.624525
389	TUa-3268	Lohne 2004		Os Hordaland; Lysevagvatnet	60.2132	5.36	1	9150	55	0	9150	55	10320.3	171.667	97.3333	gyttja	0	corr	Terrestrial plant material: Leaf fragments of probably Betula. Mosses (Racomitrium); fruit (Betula); twig	gyttja	sandy silty gyttja	negative	505-12: 1253–1255		n/a	nd	nd	nd	nd	0	0.05	0	0	0	0	0.701217	0.01	0.1	0	1	0	nd	2004	20.7	MTL	midpoint	1.2265	1.2265	-0.62904
390	TUa-2179	Lohne 2004		Os Hordaland; Lysevagvatnet	60.2132	5.36	1	9415	90	0	9415	90	10587	488	278	gyttja	0	corr	Terrestrial plant material: Leaf of Betula or Alnus. Mosses (Racomitrium); fruits and catkin (Betula)	gyttja	gytja	negative	505-12: 1259.5–1260.5		n/a	nd	nd	nd	nd	0	0.05	0	0	0	0	0.707254	0.01	0.1	0	1	0	nd	2004	20.7	MTL	midpoint	1.22996	1.22996	-0.62904
391	T-12552A	Prosch-Danielsen and Sandgren 2003	2	Jaeren; Sele-Bybergsletten; Holen	58.8038	5.55674	1	6545	145	0	6545	145	7459.67	280.333	445.667	lacustrine gyttja	1	corr	gyttja	nd	nd	negative	nd	nd	n/a	nd	nd	nd	nd	0	0.1	0	0	0	0	2	0	0.1	0	1	0	nd	2003	10.2	MTL	midpoint	2.24054	2.24054	-0.236227
392	Ua-15731	Bondevik and Mangerud 2002	2	Os Hordaland; Kloppamyra	60.1892	5.41	1	10115	160	0	10115	160	11655	805	416	silt, fine sand	0	corr	salix polaris, salix herbacea, terrestrial mosses	gravel	grey-black silt gyttja	negative	n/a	n/a	n/a	nd	nd	nd	nd	0	0.1	0	0	0	0	0.761638	0	0.1	0	1	0	nd	2002	52.3	MSL	midpoint	1.26495	1.26495	-0.647703
393	Ua-15732	Bondevik and Mangerud 2002	2	Os Hordaland; Kloppamyra	60.1892	5.41	1	10285	165	0	10285	165	12234.8	381.214	832.786	silt, fine sand	0	corr	salix polaris, salix herbacea, terrestrial mosses	gravel	grey-black silt gyttja	negative	n/a	n/a	n/a	nd	nd	nd	nd	0	0.1	0	0	0	0	0.761638	0	0.1	0	1	0	nd	2002	52.3	MSL	midpoint	1.26495	1.26495	-0.647703
394	Ua-15733	Bondevik and Mangerud 2002	2	Os Hordaland; Kloppamyra	60.1892	5.41	1	11505	200	0	11505	200	13325.8	470.25	323.75	silt, fine sand	0	corr	wood fragments and twigs salix repens terrestrial mosses	gravel	grey-black silt gyttja	negative	n/a	n/a	n/a	nd	nd	nd	nd	0	0.1	0	0	0	0	0.758538	0	0.1	0	1	0	nd	2002	52.3	MSL	midpoint	1.26308	1.26308	-0.647703
395	Tua-2083	Bondevik and Mangerud 2002	2	Os Hordaland; Stolsmyra	60.1811	5.41	1	11135	60	380	11135	60	13047.8	114.25	140.75	silt, fine sand	2	corr	mytilus edulis	gravel	grey-black silt gyttja	negative	n/a	n/a	n/a	nd	nd	nd	nd	0	0.1	0	0	0	0	0.956	0	0.1	0	1	0	nd	2002	45.6	MSL	midpoint	1.39066	1.39066	-0.647804
396	Tua-2084	Bondevik and Mangerud 2002	2	Os Hordaland; Stolsmyra	60.1811	5.41	1	12440	55	380	12440	55	13357.5	515.5	242.5	silt, fine sand	2	corr	littorina littorea	gravel	grey-black silt gyttja	negative	n/a	n/a	n/a	nd	nd	nd	nd	0	0.1	0	0	0	0	0.956	0	0.1	0	1	0	nd	2002	45.6	MSL	midpoint	1.39066	1.39066	-0.647804
397	Tua-2085	Bondevik and Mangerud 2002	2	Os Hordaland; Irgenstjorn	60.1718	5.42	1	12330	40	380	12330	40	13516.5	199.5	178.5	silt, fine sand	2	corr	mytilus edulis	gravel	grey-black silt gyttja	negative	n/a	n/a	n/a	nd	nd	nd	nd	0	0.1	0	0	0	0	0.995	0	0.1	0	1	0	nd	2002	49.5	MSL	midpoint	1.41775	1.41775	-0.650816
398	T-13877	Bondevik and Mangerud 2002	2	Os Hordaland; Irgenstjorn	60.1718	5.42	1	12320	165	380	12320	165	13503.5	455.5	366.5	silt, fine sand	2	corr	one valve of arctica islandica	gravel	grey-black sandy gyttja	negative	n/a	n/a	n/a	nd	nd	nd	nd	0	0.1	0	0	0	0	0.995	0	0.1	0	1	0	nd	2002	49.5	MSL	midpoint	1.41775	1.41775	-0.650816
399	Tua-2086	Bondevik and Mangerud 2002	2	Os Hordaland; Irgenstjorn	60.1718	5.42	1	12490	55	380	12490	55	13407	512	247	silt, fine sand	2	corr	fragments of shell	gravel	grey-black sandy gyttja	negative	n/a	n/a	n/a	nd	nd	nd	nd	0	0.1	0	0	0	0	0.995	0	0.1	0	1	0	nd	2002	49.5	MSL	midpoint	1.41775	1.41775	-0.650816
400	T-8877	Juhl 2001 (as in Prosch-Danielsen 2006)	2	Buoy; Klampen	58.7961	5.61869	1	7755	45	0	7755	45	7885.5	148.5	189.5	archeological site	0	corr	burnt hazelnut shells	nd	nd	nd	n/a	n/a	n/a	nd	nd	nd	nd	0	0.1	0	0	0	0	0.5	0	0.1	0	1	0	nd	2001	6.6	MTL	midpoint	1.12694	1.12694	-0.238282
401	T-8884	Juhl 2001 (as in Prosch-Danielsen 2006)	2	Buoy; Klampen	58.9908	5.75183	1	7465	125	0	7465	125	8275	242	260	archeological site	0	corr	burnt hazelnut shells	nd	nd	nd	n/a	n/a	n/a	nd	nd	nd	nd	0	0.1	0	0	0	0	0.5	0	0.1	0	1	0	nd	2001	6.6	MTL	midpoint	1.12694	1.12694	-0.42216
402	T-8438	Juhl 2001 (as in Prosch-Danielsen 2006)	2	Buoy; Klampen	58.9908	5.75183	1	4760	60	0	4760	60	5510.25	80.75	185.25	archeological site	0	corr	charcoal	nd	nd	nd	n/a	n/a	n/a	nd	nd	nd	nd	0	0.1	0	0	0	0	4	0	0.1	0	1	0	nd	2001	12	MTL	midpoint	4.12553	4.12553	-0.42216
403	T-8443	Juhl 2001 (as in Prosch-Danielsen 2006)	2	Buoy; Klampen	58.9908	5.75183	1	4860	100	0	4860	100	5559.25	329.75	235.25	archeological site	0	corr	cooking pit	nd	nd	nd	n/a	n/a	n/a	nd	nd	nd	nd	0	0.1	0	0	0	0	4	0	0.1	0	1	0	nd	2001	12	MTL	midpoint	4.12553	4.12553	-0.42216
404	Beta-126386	Midtbo 2000	2	Fosen Karmoy	59.347	5.48	1	2320	50	0	2320	50	2298.88	420.125	233.875	nd	1	corr	not reported; assumed bulk sediment	nd	nd	nd	n/a	n/a	n/a	nd	nd	nd	nd	0	0.1	0	0	0	0	0.5	0	0.1	0	1	0	nd	2000	2	MSL	midpoint	1.12694	1.12694	-0.384244
405	Beta-126388	Midtbo 2000	2	Fosen Karmoy	59.347	5.48	1	2150	50	0	2150	50	2139	216	309	nd	1	corr	not reported; assumed bulk sediment	nd	nd	n/a	n/a	n/a	n/a	nd	nd	nd	nd	0	0.1	0	0	0	0	0.5	0	0.1	0	1	0	nd	2000	2	MSL	midpoint	1.12694	1.12694	-0.384244
406	Beta-126390	midtbo 2000 (as in Prosch-Danielsen 2006)	2	Tysvaer	59.3338	5.44	1	9610	70	0	9610	70	11029.9	204.125	441.875	nd	1	corr	organic material	nd	nd	negative	n/a	n/a	n/a	nd	nd	nd	nd	0	0.1	0	0	0	0	0.616141	0	0.1	0	1	0	nd	2000	11.6	MSL	midpoint	1.18306	1.18306	-0.363825
407	T-13779A	midtbo 2000 (as in Prosch-Danielsen 2006)	2	Tysvaer	59.3064	5.47	1	7445	55	0	7445	55	8265	164	251	peat	1	corr	organic material	nd	nd	negative	n/a	n/a	n/a	nd	nd	nd	nd	0	0.1	0	0	0	0	0.5	0	0.1	0	1	0	nd	2000	8.3	MSL	midpoint	1.12694	1.12694	-0.381185
408	T-13778A	midtbo 2000 (as in Prosch-Danielsen 2006)	2	Tysvaer	59.3064	5.47	1	4965	115	0	4965	115	5763	398	441	peat	1	corr	organic material	nd	nd	negative	n/a	n/a	n/a	nd	nd	nd	nd	0	0.1	0	0	0	0	0.5	0	0.1	0	1	0	nd	2000	8.3	MSL	midpoint	1.12694	1.12694	-0.381185
409	T-1716	Prosch-Danielsen and Simonsen 2000 (as in Prosch-Danielsen 2006)	2	Jaeren; Sore Eigeroy Vodlatjern	58.4269	5.89478	1	3730	100	0	3730	100	4140.5	264.5	298.5	peat	0	corr	magno caricetum peat	coarse detritus gyttja	gyttja	negative	1	1.5	nd	nd	0.25	nd	nd	0	0.1	0	0	0	0	0.5	0	0.1	0	1	0	nd	2000	4	MTL	midpoint	1.12694	1.12694	-0.0901568
410	T-1715	Prosch-Danielsen and Simonsen 2000 (as in Prosch-Danielsen 2006)	2	Jaeren; Sore Eigeroy Podlamyr	58.4262	5.95224	1	2880	210	0	2880	210	3107.5	449.5	617.5	peat	0	corr	terrestrial carr peat	sedge peat	coarse marine detritus gyttja	negative	1.1	nd	nd	nd	0.25	nd	nd	0	0.1	0	0	0	0	0.5	0	0.1	0	1	0	nd	2000	2	MTL	midpoint	1.12694	1.12694	-0.0836416
411	T-1714	Prosch-Danielsen and Simonsen 2000 (as in Prosch-Danielsen 2006)	2	Jaeren; Sore Eigeroy Podlamyr	58.4262	5.95224	1	2320	80	0	2320	80	2276.75	422.25	154.75	peat	0	corr	terrestrial carr peat	freshwater sediment	sedge peat	negative	1.1	nd	nd	nd	0.25	nd	nd	0	0.1	0	0	0	0	0.5	0	0.1	0	1	0	nd	2000	2	MTL	midpoint	1.12694	1.12694	-0.0836416
412	T-3346	Sorenson et al. 1999	2	south vestfold; Eiinborg	59.229	10.7807	1	11380	95	0	11380	95	13232.5	208.5	121.5	marine facies	2	corr	shell	marine gyttja	marine gyttja	negative	nd	nd	nd	nd	nd	nd	nd	0	0.1	0	0	0	0	1	0	0.1	0	1	0	nd	1999	10	MSL	midpoint	1.42127	1.42127	-0.184311
413	T-10 801	Sorenson et al. 1999	2	south vestfold; Oberg grustak III	59.1194	11.4217	1	11240	75	0	11240	75	12470.5	205.5	371.5	marine facies	3	corr	whalebone	marine gyttja	marine gyttja	negative	nd	nd	nd	nd	nd	nd	nd	0	0.1	0	0	0	0	1	0	0.1	0	1	0	nd	1999	145	MSL	midpoint	1.42127	1.42127	-0.179393
414	T-3719	Sorenson et al. 1999	2	south vestfold; Oberg grustakIl	59.1194	11.4217	1	11100	30	0	11100	30	12271.5	221.5	323.5	marine facies	2	corr	shell	marine gyttja	marine gyttja	negative	nd	nd	nd	nd	nd	nd	nd	0	0.1	0	0	0	0	1	0	0.1	0	1	0	nd	1999	120	MSL	midpoint	1.42127	1.42127	-0.179393
415	Tua-1399A	Sorenson et al. 1999	2	south vestfold; Blanketjem	59.0748	11.5253	1	10480	50	0	10480	50	11298.5	457.5	364.5	terrestrial facies	1	corr	gyttja	gyttja	marine gyttja	negative	nd	nd	nd	nd	nd	nd	nd	0	0.1	0	0	0	0	0.5	0	0.1	0	1	0	nd	1999	197	MSL	midpoint	1.12694	1.12694	-0.17932
416	T-4134A	Sorenson et al. 1999	2	south vestfold; Dalbutjem (1)	59.0043	11.5105	1	10040	0	0	10040	0	11553.3	371.667	302.333	terrestrial facies	1	corr	gyttja	gyttja	marine gyttja	negative	nd	nd	nd	nd	nd	nd	nd	0	0.1	0	0	0	0	0.5	0	0.1	0	1	0	nd	1999	175.5	MSL	midpoint	1.12694	1.12694	-0.179316
417	T-10802	Sorenson et al. 1999	2	south vestfold; Oberg grustak I	59.1194	11.4217	1	10040	70	0	10040	70	11575.5	237.5	295.5	marine facies	2	corr	shell	marine gyttja	marine gyttja	negative	nd	nd	nd	nd	nd	nd	nd	0	0.1	0	0	0	0	1	0	0.1	0	1	0	nd	1999	150	MSL	midpoint	1.42127	1.42127	-0.179393
418	T-2748	Sorenson et al. 1999	2	south vestfold; Eidet (Fleet)	59.3116	11.0202	1	9375	30	0	9375	30	9782.5	287.5	242.5	marine facies	2	corr	shell	marine gyttja	marine gyttja	negative	nd	nd	nd	nd	nd	nd	nd	0	0.1	0	0	0	0	0.5	0	0.1	0	1	0	nd	1999	100	MSL	midpoint	1.12694	1.12694	0
419	T-2747	Sorenson et al. 1999	2	south vestfold; Botne, Kjerkey	59.05	11.0517	1	6395	95	0	6395	95	6467	283	268	marine facies	2	corr	shell	marine gyttja	marine gyttja	negative	nd	nd	nd	nd	nd	nd	nd	0	0.1	0	0	0	0	2.5	0	0.1	0	1	0	nd	1999	45	MSL	midpoint	2.69629	2.69629	-0.18278
420	T-3106	Sorenson et al. 1999	2	south vestfold; Kringlemyr (2)	59.2805	10.916	1	5700	80	0	5700	80	5722.5	367.5	321.5	terrestrial facies	1	corr	gyttja	gyttja	marine gyttja	negative	nd	nd	nd	nd	nd	nd	nd	0	0.1	0	0	0	0	0.5	0	0.1	0	1	0	nd	1999	42	MSL	midpoint	1.12694	1.12694	0
421	T-3107	Sorenson et al. 1999	2	south vestfold; Klosterrnyr (2)	59.4168	10.6977	1	4340	70	0	4340	70	5071.75	235.25	491.75	terrestrial facies	1	corr	wood	gyttja	marine gyttja	negative	nd	nd	nd	nd	nd	nd	nd	0	0.1	0	0	0	0	0.5	0	0.1	0	1	0	nd	1999	26	MSL	midpoint	1.12694	1.12694	-0.179424
422	T-2255	Sorenson et al. 1999	2	south vestfold; Gunnildsmyr (2)	59.2038	11.1387	1	4000	50	0	4000	50	4442.38	381.625	287.375	terrestrial facies	1	corr	wood	gyttja	marine gyttja	negative	nd	nd	nd	nd	nd	nd	nd	0	0.1	0	0	0	0	0.5	0	0.1	0	1	0	nd	1999	24	MSL	midpoint	1.12694	1.12694	-1.01985
423	Tua-1122	Bondevik et al. 1998	2	Sula; klingrevatnet	62.45	6.25	1	7175	75	0	7175	75	7980.5	191.5	132.5	sand bed	0	corr	plant fragment	organic material	organic material	negative	n/a	n/a	n/a	nd	nd	nd	nd	0	0.1	0	0	0	0	0.5	0	0.1	0	1	0	nd	1998	5.5	MSL	midpoint	1.12694	1.12694	-0.961627
424	B1998-notlisted-1	Bondevik et al. 1998	2	Sunnmore; Froystadmyra I	62.3333	5.7	1	6620	85	0	6620	85	7512.75	200.25	252.75	marine sediment	1	corr	not reported; assumed bulk sediment	brackish sediment	brackish sediment	negative	n/a	n/a	n/a	nd	nd	nd	nd	0	0.1	0	0	0	0	0.5	0	0.1	0	1	0	nd	1998	6.4	MSL	midpoint	1.12694	1.12694	-0.961627
425	B1998-notlisted-2	Bondevik et al. 1998	2	Sunnmore; Froystadmyra I	62.3333	5.7	1	4960	120	0	4960	120	5763.25	399.75	442.25	lacustrine sediments	1	corr	not reported; assumed bulk sediment	lacustrine sediments	brackish sediment	negative	n/a	n/a	n/a	nd	nd	nd	nd	0	0.1	0	0	0	0	0.5	0	0.1	0	1	0	nd	1998	6.4	MSL	midpoint	1.12694	1.12694	-0.366155
426	T-4417	Lindblom 1997	2	Karmoy; Husoy; site 2	59.3417	5.2949	1	3320	80	0	3320	80	3567	253	191	carr peat	0	corr	alnus twigs	charcoal	nd	negative	n/a	n/a	n/a	nd	nd	nd	nd	0	0	0	0	0	0	0.5	0	0.1	0	1	0	nd	1997	10.2	MSL	midpoint	1.1225	1.1225	-0.366155
427	T-4418	Lindblom 1997	2	Karmoy; Husoy; site 4	59.3417	5.2949	1	3240	80	0	3240	80	3491.75	194.25	236.75	charcoal	0	corr	beach sands	charcoal	nd	negative	n/a	n/a	n/a	nd	nd	nd	nd	0	0	0	0	0	0	1	0	0.1	0	1	0	nd	1997	11.5	MSL	midpoint	1.41774	1.41774	-0.366155
428	T-4419	Lindblom 1997	2	Karmoy; Husoy; site 3	59.3417	5.2949	1	3530	50	0	3530	50	3804.75	161.25	156.75	charcoal	0	corr	beach sands	charcoal	nd	negative	n/a	n/a	n/a	nd	nd	nd	nd	0	0	0	0	0	0	0.5	0	0.1	0	1	0	nd	1997	11	MSL	midpoint	1.1225	1.1225	-0.366155
429	T-4420	Lindblom 1997	2	Karmoy; Husoy; site 4	59.3417	5.2949	1	3600	70	0	3600	70	3922.5	214.5	223.5	charcoal	0	corr	beach sands	charcoal	nd	negative	n/a	n/a	n/a	nd	nd	nd	nd	0	0	0	0	0	0	1	0	0.1	0	1	0	nd	1997	11.5	MSL	midpoint	1.41774	1.41774	-0.366155
430	T-4422	Lindblom 1997	2	Karmoy; Husoy; site 6	59.3417	5.2949	1	2630	90	0	2630	90	2779.5	173.5	346.5	charcoal	0	corr	beach sands	charcoal	nd	negative	n/a	n/a	n/a	nd	nd	nd	nd	0	0	0	0	0	0	0.5	0	0.1	0	1	0	nd	1997	14	MSL	midpoint	1.1225	1.1225	-0.366155
431	T-4423	Lindblom 1997	2	Karmoy; Husoy; site 3	59.3417	5.2949	1	2800	110	0	2800	110	2899	317	169	charcoal	0	corr	beach sands	charcoal	nd	negative	n/a	n/a	n/a	nd	nd	nd	nd	0	0	0	0	0	0	0.5	0	0.1	0	1	0	nd	1997	11	MSL	midpoint	1.1225	1.1225	-0.366155
432	T-4424	Lindblom 1997	2	Karmoy; Husoy; site 4	59.3417	5.2949	1	3780	100	0	3780	100	4153.67	266.333	270.667	charcoal	0	corr	beach sands	charcoal	nd	negative	n/a	n/a	n/a	nd	nd	nd	nd	0	0	0	0	0	0	0.5	0	0.1	0	1	7	nd	1997	11.5	MSL	midpoint	7.08943	7.08943	-0.438918
433	T-4425	Lindblom 1997	2	Karmoy; Husoy; site 2	59.3417	5.2949	1	2230	80	0	2230	80	2258.75	141.25	263.75	charcoal	0	corr	beach sands	charcoal	nd	negative	n/a	n/a	n/a	nd	nd	nd	nd	0	0	0	0	0	0	0.5	0	0.1	0	1	0	nd	1997	10.2	MSL	midpoint	1.1225	1.1225	-0.438918
434	Tua-416	Helle et al. 1997	2	Hardangerfjorden; BU-113	60.46	6.85	1	7595	80	0	7595	80	8414.75	131.25	217.75	lacustrine gyttja	0	corr	plant fragments	marine silt	marine silt	negative	n/a	n/a	n/a	nd	nd	nd	nd	0	0.01	0	0	0	0	1.06449	0	0.1	0	1	0	nd	1997	112.9	MSL	midpoint	1.46398	1.46398	-0.438918
435	Tua-415	Helle et al. 1997	2	Hardangerfjorden; BU-113	60.46	6.85	1	9550	110	0	9550	110	10908.5	278.5	328.5	lacustrine gyttja	0	corr	plant fragments	marine silt	marine silt	negative	n/a	n/a	n/a	nd	nd	nd	nd	0	0.01	0	0	0	0	1.06228	0	0.1	0	1	0	nd	1997	112.9	MSL	midpoint	1.46237	1.46237	-0.438918
436	T-9619A	Helle et al. 1997	2	Hardangerfjorden; BU-113	60.46	6.85	1	9665	125	0	9665	125	10972.4	627.625	462.375	lacustrine gyttja	1	corr	not reported; assumed bulk sediment	lacustrine gyttja	marine sediment	negative	n/a	n/a	n/a	nd	nd	nd	nd	0	0.01	0	0	0	0	1.06449	0	0.1	0	1	0	nd	1997	112.9	MSL	midpoint	1.46398	1.46398	-0.438918
437	Ua-2586	Helle et al. 1997	2	Hardangerfjorden; BU-113	60.46	6.85	1	10065	125	0	10065	125	11687.2	757.75	488.25	brackish gyttja	1	corr	not reported; assumed bulk sediment	lacustrine gyttja	lacustrine gyttja	negative	n/a	n/a	n/a	nd	nd	nd	nd	0	0.01	0	0	0	0	1.06228	0	0.1	0	1	0	nd	1997	112.9	MSL	midpoint	1.46237	1.46237	-0.438918
438	T-10148	Helle et al. 1997	2	Hardangerfjorden; Vambheim-119	60.5558	6.89	1	8300	100	0	8300	100	9252	229	226	lacustrine gyttja	0	corr	pinus piece of wood	lacustrine gyttja	lacustrine gyttja	negative	n/a	n/a	n/a	nd	nd	nd	nd	0	0.01	0	0	0	0	1.093	0	0.1	0	1	0	nd	1997	118.6	MSL	midpoint	1.48484	1.48484	-0.438918
439	Ua-2584	Helle et al. 1997	2	Hardangerfjorden; Vambheim-119	60.5558	6.89	1	8400	95	0	8400	95	9435.17	221.833	422.167	lacustrine gyttja	1	corr	not reported; assumed bulk sediment	lacustrine gyttja	marine sediment	negative	n/a	n/a	n/a	nd	nd	nd	nd	0	0.01	0	0	0	0	1.093	0	0.1	0	1	0	nd	1997	118.6	MSL	midpoint	1.48484	1.48484	-0.438918
440	T-9618A	Helle et al. 1997	2	Hardangerfjorden; Vambheim-119	60.5558	6.89	1	10935	135	0	10935	135	12897	271	274	marine sediment	1	corr	not reported; assumed bulk sediment	lacustrine gyttja	lacustrine gyttja	negative	n/a	n/a	n/a	nd	nd	nd	nd	0	0.01	0	0	0	0	1.09078	0	0.1	0	1	0	nd	1997	118.6	MSL	midpoint	1.4832	1.4832	-0.438918
441	Ua-2585	Helle et al. 1997	2	Hardangerfjorden; Vambheim-128	60.553	6.9	1	6150	180	0	6150	180	7038.83	390.167	534.833	blue-grey silt	1	corr	not reported; assumed bulk sediment	olive-green gyttja-rich gravel	grey sand with gravel	negative	n/a	n/a	n/a	nd	nd	nd	nd	0	0.01	0	0	0	0	1.14	0	0.1	0	1	0	nd	1997	128	MSL	midpoint	1.51977	1.51977	-1.16887
442	T-9654A	Helle et al. 1997	2	Hardangerfjorden; Vambheim-128	60.553	6.9	1	8485	120	0	8485	120	9408.25	486.75	381.25	laminated organic mud	1	corr	not reported; assumed bulk sediment	grey sand with gravel	nd	negative	n/a	n/a	n/a	nd	nd	nd	nd	0	0.01	0	0	0	0	1.13778	0	0.1	0	1	0	nd	1997	128	MSL	midpoint	1.5181	1.5181	-1.16887
443	TUa-869A	Solem and Solem 1997	2	Tjeldbergodden; Kvennavatnet A MR	63.4081	8.7	1	9315	85	0	9315	85	10562	507	336	fine detrital gyttja	1	corr	Lacustrine gyttja	fine detrital gyttja	clay	negative	4.64	nd	no	Russian corer	1	nd	nd	0	0.1	0	0	0	0	0.890181	0	0.1	0	1	0	nd	1997	39	MSL	midpoint	1.34626	1.34626	-1.10268
444	TUa-870A	Solem and Solem 1997	2	Tjeldbergodden; Kvennavatnet A MR	63.4081	8.7	1	9200	95	0	9200	95	10407.8	350.25	488.75	fine detrital gyttja	1	corr	Lacustrine gyttja	fine detrital gyttja	clay	negative	4.6	nd	no	Russian corer	1	nd	nd	0	0.1	0	0	0	0	0.878673	0	0.1	0	1	0	nd	1997	39	MSL	midpoint	1.33868	1.33868	-1.10268
445	Tua-978	solem et al. 1997	2	Hitra; Kvernavatnet H ST	63.4354	8.44	1	10545	75	0	10545	75	12587	150	583	sand with humus	1	corr	Lacustrine gyttja	sand and clay	sand and clay	negative	3.385	nd	no	Russian corer	1	nd	nd	0	0.1	0	0	0	0	0.87	0	0.1	0	1	0	nd	1997	37	MSL	midpoint	1.333	1.333	-1.10268
446	T-11488	solem et al. 1997	2	Hitra; Kvernavatnet H ST	63.4354	8.44	1	9545	95	0	9545	95	10913.3	308.667	411.333	coarse detrital gyttja	1	corr	Lacustrine gyttja	coarse detrital gyttja	sand and clay	negative	3.385	nd	no	Russian corer	1	nd	nd	0	0.1	0	0	0	0	0.870088	0	0.1	0	1	0	nd	1997	37	MSL	midpoint	1.33306	1.33306	-1.07245
447	Tua-874A	solem et al. 1997	2	Hitra; Kvernavatnet H ST	63.4354	8.44	1	8670	95	0	8670	95	9763.5	396.5	300.5	coarse detrital gyttja	1	corr	Lacustrine gyttja	nd	coarse detrital gyttja	negative	3.385	nd	no	Russian corer	1	nd	nd	0	0.1	0	0	0	0	0.85915	0	0.1	0	1	0	nd	1997	37	MSL	midpoint	1.32595	1.32595	-1.15076
448	Tua-977	Solem and Solem 1997	2	Hitra; Storkuvatnet H ST	63.4654	8.37	1	8780	85	0	8780	85	9782.75	392.25	238.75	coarse detritus gyttja	1	corr	Lacustrine gyttja	coarse detritus gyttja	sand	negative	4.13	nd	no	Russian corer	1	nd	nd	0	0.1	0	0	0	0	0.789392	0	0.1	0	1	0	nd	1997	30	MSL	midpoint	1.28185	1.28185	-1.12025
449	Tua-873A	Solem and Solem 1997	2	Tjeldbergodden; Litjvatnet H ST	63.4536	8.56	1	7760	95	0	7760	95	8568.5	423.5	226.5	coarse detritus gyttja	1	corr	Lacustrine gyttja	coarse detritus gyttja	sand	negative	2.42	nd	no	Russian corer	1	nd	nd	0	0.1	0	0	0	0	0.740163	0	0.1	0	1	0	nd	1997	24	MSL	midpoint	1.25213	1.25213	-1.13007
450	Tua-1350	Bondevik et al. 1997	2	Bjugn; Audalsvatnet	63.826	9.86	1	7315	70	0	7315	70	8121.17	196.833	143.167	coarse sand	0	corr	moss stem	silt and fine sand	silt and fine sand	negative	n/a	n/a	n/a	nd	nd	nd	nd	0	0.1	0	0	0	0	0.835	0	0.1	0	1	0	nd	1997	33.5	MSL	midpoint	1.31043	1.31043	-1.12226
451	Tua-1270	Bondevik et al. 1997	2	Bjugn; Kvennavatnet	63.8341	9.84	1	7350	80	0	7350	80	8123.83	220.167	110.833	brackish sediment	0	corr	moss stem	coarse tsunami sand	marine sediment	negative	n/a	n/a	n/a	nd	nd	nd	nd	0	0.1	0	0	0	0	0.869902	0	0.1	0	1	0	nd	1997	37	MSL	midpoint	1.33294	1.33294	-0.695457
452	T-11251A	Bondevik et al. 1997	2	Bjugn; Gorrtjonna I	63.8198	9.85	1	8180	150	0	8180	150	9270.25	253.75	660.25	brown gyttja	1	corr	not reported; assumed bulk sediment	laminated gyttja	silt and fine sand	negative	n/a	n/a	n/a	nd	nd	nd	nd	0	0.1	0	0	0	0	0.919892	0	0.1	0	1	0	nd	1997	42	MSL	midpoint	1.36609	1.36609	-0.695403
453	T-11704A	Bondevik et al. 1997	2	Bjugn; Auretjorn	60.7898	4.89	1	7320	80	0	7320	80	8106	273	229	lacustrine gyttja	1	corr	not reported; assumed bulk sediment	lacustrine gyttja	lacustrine gyttja	negative	n/a	n/a	n/a	nd	nd	nd	nd	0	0.1	0	0	0	0	0.623472	0	0.1	0	1	0	nd	1997	13	MSL	midpoint	1.18689	1.18689	-0.697518
454	T-11203A	Bondevik et al. 1997	2	Austrheim; Asetjorn	60.7589	4.92	1	9590	90	0	9590	90	10991.3	249.667	425.333	lacustrine gyttja	1	corr	not reported; assumed bulk sediment	coarse tsunami deposit	lacustrine gyttja	negative	n/a	n/a	n/a	nd	nd	nd	nd	0	0.1	0	0	0	0	0.640214	0	0.1	0	1	0	nd	1997	14	MSL	midpoint	1.19577	1.19577	-1.02779
455	T-11204A	Bondevik et al. 1997	2	Austrheim; Arasvatnet	60.7738	4.94	1	9765	105	0	9765	105	11054.6	636.375	355.625	brackish sediments	1	corr	not reported; assumed bulk sediment	lacustrine sediments	marine sediments	negative	n/a	n/a	n/a	nd	nd	nd	nd	0	0.1	0	0	0	0	0.620215	0	0.1	0	1	0	nd	1997	12	MSL	midpoint	1.18519	1.18519	-1.01538
456	T-4162	Bondevik et al. 1997	2	Bjugn; Endrevatnet	62.4325	6.28	1	7490	90	0	7490	90	8280.75	258.25	256.75	lacustrine sediments	1	corr	not reported; assumed bulk sediment	lacustrine sediments	lacustrine sediments	negative	n/a	n/a	n/a	nd	nd	nd	nd	0	0.1	0	0	0	0	0.615578	0	0.1	0	1	0	nd	1997	12.5	MSL	midpoint	1.18277	1.18277	-0.961834
457	T-10594A	Bondevik et al. 1997	2	alesund; Ratvikvatnet	62.4652	6.27	1	7430	95	0	7430	95	8262.5	252.5	295.5	lacustrine sediments	1	corr	not reported; assumed bulk sediment	lacustrine sediments	coarse tsunami deposit	negative	n/a	n/a	n/a	nd	nd	nd	nd	0	0.1	0	0	0	0	0.650673	0	0.1	0	1	0	nd	1997	16	MSL	midpoint	1.20141	1.20141	-0.102141
458	T-11248A	Bondevik et al. 1997	2	Leinoy; Froystadmyra I	62.3286	5.71	1	9795	160	0	9795	160	10991.8	833.167	399.833	brackish gyttja	1	corr	not reported; assumed bulk sediment	lacustrine sediment	marine sediment	negative	n/a	n/a	n/a	nd	nd	nd	nd	0	0.1	0	0	0	0	0.5	0	0.1	0	1	0	nd	1997	6.4	MSL	midpoint	1.12694	1.12694	-0.0995009
459	T-249B	Prosch-Danielsen 1997	2	Lista; Hoylandsmyr	58.1006	6.71192	1	11500	300	0	11500	300	13454.5	581.5	686.5	lacustrine gyttja	1	corr	clay-mud	lacustrine gyttja	lacustrine gyttja	negative	487-512	n/a	n/a	nd	nd	nd	nd	0	0.1	0	0	0	0	3	0	0.1	0	1	0	nd	1997	6.7	MSL	midpoint	3.16544	3.16544	-0.0995009
460	Tua-665A	Prosch-Danielsen 1997	2	Lista; Braastadvann	58.1011	6.68592	1	5685	65	0	5685	65	6536.25	208.75	315.25	brackish gyttja	1	corr	detrital gyttja	lacustrine gyttja	marine sediment	negative	465	n/a	n/a	nd	nd	nd	nd	0	0.1	0	0	0	0	0.5	0	0.1	0	1	0	nd	1997	6.5	MSL	midpoint	1.12694	1.12694	-0.0995009
461	Tua-934A	Prosch-Danielsen 1997	2	Lista; Braastadvann	58.1011	6.68592	1	6995	75	0	6995	75	7859.75	162.25	268.75	brackish gyttja	1	corr	detrital gyttja	marine sediment	lacustrine sediment	positive	530	n/a	n/a	nd	nd	nd	nd	0	0.1	0	0	0	0	0.5	0	0.1	0	1	0	nd	1997	6.5	MSL	midpoint	1.12694	1.12694	-0.100467
462	Tua-664A	Prosch-Danielsen 1997	2	Lista; Braastadvann	58.1011	6.68592	1	7210	65	0	7210	65	8082.5	238.5	292.5	brackish gyttja	1	corr	detrital gyttja	marine sediment	lacustrine sediment	positive	585	n/a	n/a	nd	nd	nd	nd	0	0.1	0	0	0	0	0.5	0	0.1	0	1	0	nd	1997	6.5	MSL	midpoint	1.12694	1.12694	-0.100467
463	Tua-718A	Prosch-Danielsen 1997	2	Lista; Prxstvann	58.1015	6.69558	1	5090	55	0	5090	55	5830	345	238	brackish gyttja	1	corr	detrital gyttja	lacustrine sediment	marine sediment	negative	625	n/a	n/a	nd	nd	nd	nd	0	0.1	0	0	0	0	0.5	0	0.1	0	1	0	nd	1997	6	MSL	midpoint	1.12694	1.12694	-0.107738
464	Tua-720A	Prosch-Danielsen 1997	2	Lista; Prxstvann	58.1015	6.69558	1	7160	60	0	7160	60	8004.17	186.833	301.167	lacustrine gyttja	1	corr	detrital gyttja	marine sediment	lacustrine sediment	positive	700	n/a	n/a	nd	nd	nd	nd	0	0.1	0	0	0	0	0.5	0	0.1	0	1	0	nd	1997	6	MSL	midpoint	1.12694	1.12694	-0.107738
465	Ua-3827	Hoeg et al. 1995 (also in Prosch-Danielsen 1997)	2	Lista; Fjellestadmyr II	58.0899	6.78391	1	3635	70	0	3635	70	3991.5	360.5	399.5	lacustrine gyttja	1	corr	not reported; assumed bulk sediment	marine sediment	lacustrine sediment	negative	61	n/a	n/a	nd	nd	nd	nd	0	0.1	0	0	0	0	0.5	0	0.1	0	1	0	nd	1997	4.88	MSL	midpoint	1.12694	1.12694	-0.102131
466	Ua-3828	Hoeg et al. 1995 (also in Prosch-Danielsen 1997)	2	Lista; Fjellestadmyr II	58.0899	6.78391	1	6835	85	0	6835	85	7664	269	229	lacustrine gyttja	1	corr	not reported; assumed bulk sediment	marine sediment	lacustrine sediment	positive	124.5	n/a	n/a	nd	nd	nd	nd	0	0.1	0	0	0	0	0.5	0	0.1	0	1	0	nd	1997	4.88	MSL	midpoint	1.12694	1.12694	-0.109037
467	Tua-719A	Prosch-Danielsen 1997	2	Lista; Kviljotjonn	58.0759	6.69897	1	5240	60	0	5240	60	6069.62	211.375	323.625	brackish gyttja	1	corr	diatomite	lacustrine sediment	marine sediment	negative	212.5	n/a	n/a	nd	nd	nd	nd	0	0.1	0	0	0	0	0.5	0	0.1	0	1	0	nd	1997	4.6	MSL	midpoint	1.12694	1.12694	-0.109037
468	T-10495A	Prosch-Danielsen 1997	2	Lista; Skjoldncsmyr I	58.0754	6.80947	1	3760	105	0	3760	105	4196.75	326.25	494.75	brackish gyttja	1	corr	not reported; assumed bulk sediment	lacustrine sediment	marine sediment	negative	357.5	n/a	n/a	nd	nd	nd	nd	0	0.1	0	0	0	0	0.5	0	0.1	0	1	0	nd	1997	3.77	MSL	midpoint	1.12694	1.12694	-0.109037
469	T-10499A	Prosch-Danielsen 1997	2	Lista; Skjoldncsmyr I	58.0754	6.80947	1	7385	110	0	7385	110	8180.67	270.333	305.667	brackish gyttja	1	corr	not reported; assumed bulk sediment	marine sediment	lacustrine sediment	positive	867.5	n/a	n/a	nd	nd	nd	nd	0	0.1	0	0	0	0	0.5	0	0.1	0	1	0	nd	1997	3.77	MSL	midpoint	1.12694	1.12694	-0.088681
470	T-10500A	Prosch-Danielsen 1997	2	Lista; Skjoldncsmyr I	58.0754	6.80947	1	7175	75	0	7175	75	8030.75	272.25	320.75	marine sediments	1	corr	not reported; assumed bulk sediment	brackish sediment	marine sediments	positive	877.5	n/a	n/a	nd	nd	nd	nd	0	0.1	0	0	0	0	0.5	0	0.1	0	1	0	nd	1997	3.77	MSL	midpoint	1.12694	1.12694	-0.101687
471	T-10501A	Prosch-Danielsen 1997	2	Lista; Skjoldncsmyr I	58.0754	6.80947	1	7405	95	0	7405	95	8159.75	285.25	215.75	lacustrine gyttja	1	corr	not reported; assumed bulk sediment	marine sediment	lacustrine gyttja	positive	881.5	n/a	n/a	nd	nd	nd	nd	0	0.1	0	0	0	0	0.5	0	0.1	0	1	0	nd	1997	3.77	MSL	midpoint	1.12694	1.12694	-0.103624
472	Tua-717	Prosch-Danielsen 1997	2	Lista; Peat formation at Vagsvoll	58.1155	6.58202	1	7330	70	0	7330	70	8108	267	169	lacustrine gyttja	1	corr	silty peat	marine sediment	lacustrine gyttja	positive	147	n/a	n/a	nd	nd	nd	nd	0	0.1	0	0	0	0	0.5	0	0.1	0	1	0	nd	1997	1.14	MSL	midpoint	1.12694	1.12694	-0.0993652
473	TUa-932A	Prosch-Danielsen 1996	2	Lista; Hallandsvann	58.1262	6.71833	1	5010	70	0	5010	70	5724.83	375.167	247.833	lacustrine sediments	1	corr	Coarse detrital gyttja	nd	nd	negative	4.2	n/a	n/a	hiller corer	nd	nd	nd	0	0.1	0	0	0	0	0.812092	0	0.1	0	1	0	nd	1996	31.3	MSL	midpoint	1.29595	1.29595	-0.100682
474	TUa-1039A	Prosch-Danielsen 1996	2	Lista; Monatjonn	58.1241	6.73164	1	2490	80	0	2490	80	2624.67	225.333	442.667	lacustrine sediments	1	corr	Fine detrital gyttja	nd	nd	negative	3.8	n/a	n/a	hiller corer	nd	nd	nd	0	0.1	0	0	0	0	0.645375	0	0.1	0	1	0	nd	1996	14.63	MSL	midpoint	1.19854	1.19854	-0.100682
475	TUa-933A	Prosch-Danielsen 1996	2	Lista; Braastadvann	58.1013	6.68486	1	3800	60	0	3800	60	4184	334	332	lacustrine sediments	1	corr	Detrital gyttja	nd	nd	negative	3.4	n/a	n/a	hiller corer	nd	nd	nd	0	0.1	0	0	0	0	0.5	0	0.1	0	1	0	nd	1996	6.5	MSL	midpoint	1.12694	1.12694	-0.100682
476	Tua-1038A	Prosch-Danielsen 1996	2	Lista; Prestvann	58.1024	6.69824	1	1530	75	0	1530	75	1446.33	257.667	268.333	lacustrine sediments	1	corr	Detrital gyttja	nd	nd	negative	3.5	n/a	n/a	hiller corer	nd	nd	nd	0	0.1	0	0	0	0	0.5	0	0.1	0	1	0	nd	1996	6	MSL	midpoint	1.12694	1.12694	-0.100682
477	Tua-928A	Prosch-Danielsen 1996	2	Lista; Prestvann	58.1024	6.69824	1	3020	65	0	3020	65	3180.5	271.5	300.5	lacustrine sediments	1	corr	Detrital gyttja	nd	nd	negative	4.9	n/a	n/a	hiller corer	nd	nd	nd	0	0.1	0	0	0	0	0.5	0	0.1	0	1	0	nd	1996	6	MSL	midpoint	1.12694	1.12694	-0.100682
478	Tua-929A	Prosch-Danielsen 1996	2	Lista; Prestvann	58.1024	6.69824	1	3355	70	0	3355	70	3619.5	336.5	345.5	lacustrine sediments	1	corr	Detrital gyttja	nd	nd	negative	5.5	n/a	n/a	hiller corer	nd	nd	nd	0	0.1	0	0	0	0	0.5	0	0.1	0	1	0	nd	1996	6	MSL	midpoint	1.12694	1.12694	-0.104477
479	Tua-930A	Prosch-Danielsen 1996	2	Lista; Prestvann	58.1024	6.69824	1	8495	80	0	8495	80	9408.25	479.75	368.25	lacustrine sediments	1	corr	Detrital gyttja	nd	nd	negative	7.8	n/a	n/a	hiller corer	nd	nd	nd	0	0.1	0	0	0	0	0.5	0	0.1	0	1	0	nd	1996	6	MSL	midpoint	1.12694	1.12694	-1.26144
480	Tua-931A	Prosch-Danielsen 1996	2	Lista; Prestvann	58.1024	6.69824	1	8950	75	0	8950	75	10026.1	342.875	466.125	lacustrine sediments	1	corr	Detrital gyttja	nd	nd	negative	8.1	n/a	n/a	hiller corer	nd	nd	nd	0	0.1	0	0	0	0	0.5	0	0.1	0	1	0	nd	1996	8	MSL	midpoint	1.12694	1.12694	-1.26144
481	Tua-1037A	Prosch-Danielsen 1996	2	Lista; Hanangervann	58.0914	6.73317	1	3845	80	0	3845	80	4319	463	443	lacustrine sediments	1	corr	Detrital gyttja	nd	nd	negative	5.3	n/a	n/a	hiller corer	nd	nd	nd	0	0.1	0	0	0	0	0.5	0	0.1	0	1	0	nd	1996	4	MSL	midpoint	1.12694	1.12694	-1.26144
482	T-1183 lA	Kui 1996 and Fodnes 1996	2	Finnmark; Landersfjorden; badevatnet	70.4457	26.8875	1	5625	75	0	5625	75	6412.67	319.333	285.667	lacustrine sediments	1	corr	gyttja	nd	nd	negative	1.78	nd	n/a	nd	nd	nd	nd	0.01	0.1	0	0	0	0	0.778978	0	0.1	0	0.5	0	nd	1996	57	MSL	midpoint	0.936433	0.936433	-1.26144
483	T-11834A	Kui 1996 and Fodnes 1996	2	Finnmark; Landersfjorden; badevatnet	70.4457	26.8875	1	5520	100		5520	100	6330.67	299.333	380.667	lacustrine sediments	1	corr	gyttja	nd	nd	negative	2.025	nd	n/a	nd	nd	nd	nd	0.025	0.1	0	0	0	0	0.778978	0	0.1	0	0.5	0	nd	1996	57	MSL	midpoint	0.936713	0.936713	-1.26144
484	T-11832A	Kui 1996 and Fodnes 1996	2	Finnmark; Landersfjorden; badevatnet	70.4457	26.8875	1	9415	105		9415	105	10892	249	616	lacustrine sediments	1	corr	gyttja	nd	nd	negative	3.2	nd	n/a	nd	nd	nd	nd	0.02	0.1	0	0	0	0	0.778978	0	0.1	0	0.5	0	nd	1996	57	MSL	midpoint	0.936593	0.936593	-1.26144
485	T-11830A	Kui 1996 and Fodnes 1996	2	Finnmark; Landersfjorden; badevatnet	70.4457	26.8875	1	10660	290		10660	290	12325.8	842.25	919.75	lacustrine sediments	1	corr	gyttja	nd	nd	negative	3.44	nd	n/a	nd	nd	nd	nd	0.03	0.1	0	0	0	0	0.778978	0	0.1	0	0.5	0	nd	1996	57	MSL	midpoint	0.93686	0.93686	-1.26144
486	T-11830B	Kui 1996 and Fodnes 1996	2	Finnmark; Landersfjorden; badevatnet	70.4457	26.8875	1	9465	100		9465	100	10893.8	290.25	586.75	lacustrine sediments	1	corr	gyttja	nd	nd	negative	3.44	nd	n/a	nd	nd	nd	nd	0.03	0.1	0	0	0	0	0.778978	0	0.1	0	0.5	0	nd	1996	57	MSL	midpoint	0.93686	0.93686	-1.26144
487	T-11809A	Kui 1996 and Fodnes 1996	2	Finnmark; Landersfjorden; badevatnet	70.4457	26.8875	1	10105	285		10105	285	11787.8	899.25	992.75	lacustrine sediments	1	corr	gyttja	nd	nd	negative	3.58	nd	n/a	nd	nd	nd	nd	0.01	0.1	0	0	0	0	0.785142	0	0.1	0	0.5	0	nd	1996	57	MSL	midpoint	0.941567	0.941567	-1.26144
488	TUa-909	Kui 1996 and Fodnes 1996	2	Finnmark; Landersfjorden; badevatnet	70.4457	26.8875	1	11405	100		11405	100	13260.5	324.5	182.5	marine sediments	1	corr	unidentified plant remains	nd	nd	negative	4.035	nd	n/a	nd	nd	nd	nd	0.005	0.1	0	0	0	0	0.785	0	0.1	0	0.5	0	nd	1996	57	MSL	midpoint	0.941409	0.941409	-1.84867
489	TUa-910	Kui 1996 and Fodnes 1996	2	Finnmark; Landersfjorden; badevatnet	70.4457	26.8875	1	11295	110		11295	110	13229.5	239.5	379.5	marine sediments	1	corr	unidentified plant remains	nd	nd	negative	4.19	nd	n/a	nd	nd	nd	nd	0.01	0.1	0	0	0	0	0.785	0	0.1	0	0.5	0	nd	1996	57	MSL	midpoint	0.941448	0.941448	-1.84867
490	TUa-911	Kui 1996 and Fodnes 1996	2	Finnmark; Landersfjorden; badevatnet	70.4457	26.8875	1	11600	85		11600	85	13463.2	290.833	275.167	marine sediments	1	corr	unidentified plant remains	nd	nd	negative	6.805	nd	n/a	nd	nd	nd	nd	0.005	0.1	0	0	0	0	0.785	0	0.1	0	0.5	0	nd	1996	57	MSL	midpoint	0.941409	0.941409	-1.85179
491	GX-16322	Snyder et al 1996	2	Dalnie Zelentsy	69.1	36.1	1	4715	100	marine	4715	100	5459.5	194.5	404.5	cobble glaciomarine sediment	2	corr	Mixed shells	nd	sand with granules and pebbles	negative	nd	n/a	n/a	nd	nd	nd	nd	n/a	0	0	0	0	0	0.5	0	0.1	0	1	0	nd	1996	9.5	MSL	midpoint	1.1225	1.1225	-1.85179
492	GX-17283	Snyder et al 1996	2	Dalnie Zelentsy	69.1	36.1	1	6395	185	0	6395	185	6402.5	438.5	459.5	littoral sediment	0	corr	Charcoal	littoral deposit	sand gravel debris	negative	1.7	n/a	n/a	nd	nd	nd	nd	n/a	0	0	0	0	0	0.620586	0	0.1	0	1	0	nd	1996	12	MSL	midpoint	1.18116	1.18116	-1.85179
493	AA-12478	Snyder et al 1996	2	Shelpinsky Bay	69.1	36.2	1	7940	75	marine	7940	75	8837.67	157.333	238.667	boulder-rich glaciomarine facies	2	corr	Littorina sp.	cobble-filled marine sediment	boulder-rich glaciomarine facies	negative	nd	n/a	n/a	nd	nd	nd	nd	n/a	0	0	0	0	0	0.5	0	0.1	0	1	0	nd	1996	5.5	MSL	midpoint	1.1225	1.1225	-1.85179
494	AA-12479	Snyder et al 1996	2	Shelpinsky Bay	69.1	36.2	1	5255	130	marine	5255	130	5152	355	363	littoral sediment	2	corr	Littorina sp.	boulder conglomerate	marine sediments	negative	2.3	nd	n/a	nd	nd	nd	nd	n/a	0	0	0	0	0	0.5	0	0.1	0	1	0	nd	1996	7.5	MSL	midpoint	1.1225	1.1225	-1.85179
495	GX-18587	Snyder et al 1996	2	Shelpinsky Bay	69.1	36.2	1	9040	390	whale	9040	390	9278	1009	972	organic rich carbonate littoral sediment	3	corr	Balanus balanus	boulder conglomerate	nd	negative	6.3	nd	n/a	nd	nd	nd	nd	n/a	0	0	0	0	0	0.5	0	0.1	0	1	0	nd	1996	4	MSL	midpoint	1.1225	1.1225	-1.85179
496	GX-17284	Snyder et al 1996	2	Shelpinsky Bay	69.1	36.2	1	6515	85	marine	6515	85	6520.5	263.5	250.5	littoral sediment	2	corr	Mya truncata	boulder conglomerate	marine sediments	negative	4	nd	n/a	nd	nd	nd	nd	n/a	0	0	0	0	0	0.5	0	0.1	0	1	0	nd	1996	6	MSL	midpoint	1.1225	1.1225	-2.07569
497	GX-18213	Snyder et al 1996	2	Shelpinsky Bay	69.1	36.2	1	5740	85	marine	5740	85	5674	266	237	boulder filled littoral sediment	2	corr	Mya truncata	boulder conglomerate	marine sediments	negative	2.5	nd	n/a	nd	nd	nd	nd	n/a	0	0	0	0	0	0.5	0	0.1	0	1	0	nd	1996	7	MSL	midpoint	1.1225	1.1225	-2.07569
498	GX-18214	Snyder et al 1996	2	Shelpinsky Bay	69.1	36.2	1	6225	85	marine	6225	85	6210.5	243.5	273.5	pebbly sand	2	corr	Astarte spp.	marine sediments	boulder conglomerate	negative	nd	nd	n/a	nd	nd	nd	nd	n/a	0	0	0	0	0	0.5	0	0.1	0	1	0	nd	1996	5	MSL	midpoint	1.1225	1.1225	-2.07569
499	GX-18212	Snyder et al 1996	2	Cape Krasny	68.7333	37.45	1	6855	90	marine	6855	90	6897.5	283.5	273.5	marine sand with shells and cobbles	2	corr	Astarte spp., Macoma spp.	marine sand with shells and cobbles	marine sand with shells and cobbles	negative	nd	nd	n/a	nd	nd	nd	nd	n/a	0	0	0	0	0	0.5	0	0.1	0	1	0	nd	1996	4.5	MSL	midpoint	1.1225	1.1225	-2.07569
500	GX-18211	Snyder et al 1996	2	Cape Krasny	68.7333	37.45	1	6210	85	marine	6210	85	6198.5	238.5	272.5	marine sand with shells and cobbles	2	corr	Astarte spp., Macoma spp.	marine sand with shells and cobbles	marine sand with shells and cobbles	negative	nd	nd	n/a	nd	nd	nd	nd	n/a	0	0	0	0	0	0.5	0	0.1	0	1	0	nd	1996	5.5	MSL	midpoint	1.1225	1.1225	-0.108551
501	GX-18210	Snyder et al 1996	2	Cape Krasny	68.7333	37.45	1	4760	75	marine	4760	75	4514	293	267	marine sand with shells and cobbles	2	corr	Astarte spp., Macoma spp.	aeolian sand dune	marine sand with shells and cobbles	negative	nd	nd	n/a	nd	nd	nd	nd	n/a	0	0	0	0	0	0.5	0	0.1	0	1	0	nd	1996	8.5	MSL	midpoint	1.1225	1.1225	-0.108551
502	GX-18586	Snyder et al 1996	2	Cape Krasny	68.7333	37.45	1	1175	80	0	1175	80	389	202	245	marine sand	0	corr	Wood	aeolian sand dune	marine sand	negative	n/a	n/a	n/a	nd	nd	nd	nd	n/a	0	0	0	0	0	0.5	0	0.1	0	1	0	nd	1996	3	MSL	midpoint	1.1225	1.1225	-0.108551
503	T-10504	Hoeg et al. 1995		Lista; GX-18586	58.0833	6.8	1	3125	70	0	3125	70	3377.5	240.5	411.5	nd	1	corr	nd	nd	nd	n/a	n/a	n/a	n/a	nd	nd	nd	nd	n/a	0	0	0	0	0	0.5	0	0.1	0	0	0	nd	1995	4.53	MTL	midpoint	0.509902	0.509902	-0.107729
504	T-10505	Hoeg et al. 1995		Lista; Fjellestad myr 1	58.0833	6.8	1	7815	95	0	7815	95	8585	413	203	nd	1	corr	nd	nd	nd	n/a	n/a	n/a	n/a	nd	nd	nd	nd	n/a	0	0	0	0	0	0.5	0	0.1	0	0	0	nd	1995	4.53	MTL	midpoint	0.509902	0.509902	-0.109372
505	T-10494A	Hoeg et al. 1995		Lista; Fjellestad myr 1	58.0833	6.8	1	9055	100	0	9055	100	10158.7	409.333	430.667	nd	1	corr	nd	nd	nd	n/a	n/a	n/a	n/a	nd	nd	nd	nd	n/a	0	0	0	0	0	0.5	0	0.1	0	0	0	nd	1995	4.53	MTL	midpoint	0.509902	0.509902	-0.109372
506	T-11029	Hoeg et al. 1995 (also in Prosch-Danielson 1997		Lista; Fjellestad myr 2	58.0833	6.78333	1	7060	110	0	7060	110	7879.5	293.5	261.5	nd	1	corr	nd	nd	nd	n/a	n/a	n/a	n/a	nd	nd	nd	nd	n/a	0	0	0	0	0	0.5	0	0.1	0	1	0	nd	1995	4.88	MTL	midpoint	1.1225	1.1225	-0.109372
507	T-10495A	Hoeg et al. 1995		Lista; Skjoldnes myr 1	58.0667	6.81667	1	3760	105	0	3760	105	4196.75	326.25	494.75	nd	1	corr	nd	nd	nd	negative	n/a	n/a	n/a	nd	nd	nd	nd	n/a	0	0	0	0	0	0.5	0	0.1	0	0	0	nd	1995	3.77	MTL	midpoint	0.509902	0.509902	-0.109372
508	T-10496A	Hoeg et al. 1995		Lista; Skjoldnes myr 1	58.0667	6.81667	1	3960	120	0	3960	120	4473.75	361.25	487.75	nd	1	corr	nd	nd	nd	negative	n/a	n/a	n/a	nd	nd	nd	nd	n/a	0	0	0	0	0	0.5	0	0.1	0	0	0	nd	1995	3.77	MTL	midpoint	0.509902	0.509902	-0.109372
509	T-10497A	Hoeg et al. 1995		Lista; Skjoldnes myr 1	58.0667	6.81667	1	5310	125	0	5310	125	6102.17	300.833	437.167	nd	1	corr	nd	nd	nd	n/a	n/a	n/a	n/a	nd	nd	nd	nd	n/a	0	0	0	0	0	0.5	0	0.1	0	0	0	nd	1995	3.77	MTL	midpoint	0.509902	0.509902	-0.109372
510	T-10498A	Hoeg et al. 1995		Lista; Skjoldnes myr 1	58.0667	6.81667	1	7095	130	0	7095	130	7862.5	426.5	257.5	nd	1	corr	nd	nd	nd	n/a	n/a	n/a	n/a	nd	nd	nd	nd	n/a	0	0	0	0	0	0.5	0	0.1	0	0	0	nd	1995	3.77	MTL	midpoint	0.509902	0.509902	-0.109372
511	T-10499A	Hoeg et al. 1995		Lista; Skjoldnes myr 1	58.0667	6.81667	1	7385	110	0	7385	110	8180.67	270.333	305.667	nd	1	corr	nd	nd	nd	positive	n/a	n/a	n/a	nd	nd	nd	nd	n/a	0	0	0	0	0	0.5	0	0.1	0	0	0	nd	1995	3.77	MTL	midpoint	0.509902	0.509902	-0.109372
512	T-10500A	Hoeg et al. 1995		Lista; Skjoldnes myr 1	58.0667	6.81667	1	7175	75	0	7175	75	8030.75	272.25	320.75	nd	1	corr	nd	nd	nd	n/a	n/a	n/a	n/a	nd	nd	nd	nd	n/a	0	0	0	0	0	0.5	0	0.1	0	0	0	nd	1995	3.77	MTL	midpoint	0.509902	0.509902	-0.987502
513	T-10501A	Hoeg et al. 1995		Lista; Skjoldnes myr 1	58.0667	6.81667	1	7405	95	0	7405	95	8159.75	285.25	215.75	nd	1	corr	nd	nd	nd	positive	n/a	n/a	n/a	nd	nd	nd	nd	n/a	0	0	0	0	0	0.5	0	0.1	0	0	0	nd	1995	3.77	MTL	midpoint	0.509902	0.509902	-0.987502
514	T-10502A *	Hoeg et al. 1995		Lista; Skjoldnes myr 1	58.0667	6.81667	1	8050	90	0	8050	90	8899.83	500.167	344.833	nd	1	corr	nd	nd	nd	n/a	n/a	n/a	n/a	nd	nd	nd	nd	n/a	0	0	0	0	0	0.5	0	0.1	0	0	0	nd	1995	3.77	MTL	midpoint	0.509902	0.509902	-0.987502
515	T-10503A	Hoeg et al. 1995		Lista; Skjoldnes myr 1	58.0667	6.81667	1	9365	120	0	9365	120	10524	576	285	nd	1	corr	nd	nd	nd	n/a	n/a	n/a	n/a	nd	nd	nd	nd	n/a	0	0	0	0	0	0.5	0	0.1	0	0	0	nd	1995	3.77	MTL	midpoint	0.509902	0.509902	-0.42216
516	Ua-3882	Hoeg et al. 1995		Lista; Skjoldnes myr 1	58.0667	6.81667	1	1147	80	0	1147	80	1105.5	189.5	311.5	nd	1	corr	nd	nd	nd	n/a	n/a	n/a	n/a	nd	nd	nd	nd	n/a	0	0	0	0	0	0.5	0	0.1	0	0	0	nd	1995	3.77	MTL	midpoint	0.509902	0.509902	-0.42216
517	T-10087	Moller 1995	2	Nordland; ersfjord	69.4831	17.4057	1	6910	55	0	6910	55	7745.5	172.5	124.5	beach sediment	2	corr	arctica islandica	beach sediment	beach sediment	negative	nd	nd	nd	nd	nd	nd	nd	0	0.2	0	0	0	0	1	0	0.1	0	1	0	nd	1995	5.5	MTL	midpoint	1.43178	1.43178	-0.16721
518	T-10089	Moller 1995	2	Nordland; ersfjord	69.4831	17.4057	1	6470	90	0	6470	90	6623.5	266.5	264.5	beach sediment	2	corr	arctica islandica	beach sediment	beach sediment	negative	nd	nd	nd	nd	nd	nd	nd	0	0.2	0	0	0	0	1	0	0.1	0	1	0	nd	1995	10.5	MTL	midpoint	1.43178	1.43178	-0.16721
519	T-10088	Moller 1995	2	Nordland; ersfjord	69.4831	17.4057	1	6660	90	0	6660	90	6837	296	251	beach sediment	2	corr	arctica islandica	beach sediment	beach sediment	negative	nd	nd	nd	nd	nd	nd	nd	0	0.2	0	0	0	0	1	0	0.1	0	1	0	nd	1995	15	MTL	midpoint	1.43178	1.43178	-0.16721
520	T-7140	Bang-Anderson 1995 (as in Prosch-Danielsen 2006)	2	Jaeren; Sele-Bybergsletten; Lego	58.9908	5.75183	1	7590	120	0	7590	120	7764	271	272	archeological site	0	corr	burnt hazelnut shells	marine gyttja and sand	archeological layer	positive	n/a	n/a	n/a	nd	nd	nd	nd	0	0.1	0	0	0	0	3	0	0.1	0	1	0	nd	1995	5.5	MTL	midpoint	3.16544	3.16544	-0.16721
521	T-7139	Bang-Anderson 1995 (as in Prosch-Danielsen 2006)	2	Jaeren; Sele-Bybergsletten; Lego	58.9908	5.75183	1	7680	150	0	7680	150	8522	458	340	archeological site	0	corr	burnt hazelnut shells	marine gyttja and sand	archeological layer	positive	n/a	n/a	n/a	nd	nd	nd	nd	0	0.1	0	0	0	0	3	0	0.1	0	1	0	nd	1995	5.5	MTL	midpoint	3.16544	3.16544	-1.38274
522	T-7137	Bang-Anderson 1995 (as in Prosch-Danielsen 2006)	2	Jaeren; Ha old vicarage	58.6611	5.56475	1	7950	90	0	7950	90	8814.58	379.417	385.583	archeological site	1	corr	hummus	hummus	glacial till	negative	2.6	n/a	n/a	nd	nd	nd	nd	0	0.1	0	0	0	0	3	0	0.1	0	1	0	nd	1995	6.5	MTL	midpoint	3.16544	3.16544	-1.36925
523	T-5972	Bang-Anderson 1995 (as in Prosch-Danielsen 2006)	2	Jaeren; Ha old vicarage	58.6611	5.56475	1	8140	90	0	8140	90	9146	283	500	archeological site	1	corr	hummus	hummus	glacial till	negative	2.6	n/a	n/a	nd	nd	nd	nd	0	0.1	0	0	0	0	3	0	0.1	0	1	0	nd	1995	6.5	MTL	midpoint	3.16544	3.16544	-1.36925
524	T-7138	Bang-Anderson 1995 (as in Prosch-Danielsen 2006)	2	Jaeren; Ha old vicarage	58.6611	5.56475	1	8430	170	0	8430	170	9282.5	835.5	498.5	archeological site	1	corr	hummus	hummus	glacial till	negative	2.6	n/a	n/a	nd	nd	nd	nd	0	0.1	0	0	0	0	3	0	0.1	0	1	0	nd	1995	6.5	MTL	midpoint	3.16544	3.16544	-1.36936
525	T-6377A	Bang-Anderson 1995 (as in Prosch-Danielsen 2006)	2	Jaeren; Ha old vicarage	58.6611	5.56475	1	4690	110	0	4690	110	5470.75	255.25	551.75	shore meadow	1	corr	hummus	beach deposits	archeological layer	nd	2.3	n/a	n/a	nd	nd	nd	nd	0	0.1	0	0	0	0	3	0	0.1	0	1	0	nd	1995	6.5	MTL	midpoint	3.16544	3.16544	-1.3664
526	T-4867	Corner and Haugane 1993	2	Troms, Lyngen; L1 basin	69.731	19.86	1	830	90	0	830	90	754.333	169.667	182.333	marine sediment	0	corr	shell	transitional sediment	marine sediment	negative	n/a	n/a	n/a	nd	nd	nd	nd	0	0.1	0	0	0	0	0.5	0	0.1	0	1	0	nd	1993	2.6	MTL	midpoint	1.12694	1.12694	-1.2883
527	T-5157	Corner and Haugane 1993	2	Troms, Lyngen; L2 basin	69.752	19.95	1	7880	100	0	7880	100	8855.25	140.75	397.25	brackish facies	0	corr	plant detritus	marine facies	marine facies	positive	n/a	n/a	n/a	nd	nd	nd	nd	0	0.1	0	0	0	0	0.686739	0	0.1	0	1	0	nd	1993	20	MTL	midpoint	1.22131	1.22131	-1.29764
528	T-4580A	Corner and Haugane 1993	2	Troms, Lyngen; L2 basin	69.752	19.95	1	6480	90	0	6480	90	7375.5	191.5	200.5	brackish facies	0	corr	gyttja	lacustrine gyttja	marine sediment	negative	n/a	n/a	n/a	nd	nd	nd	nd	0	0.1	0	0	0	0	0.686739	0	0.1	0	1	0	nd	1993	20	MTL	midpoint	1.22131	1.22131	-1.26748
529	T-4651A	Corner and Haugane 1993	2	Troms, Lyngen; L4 basin	69.751	19.95	1	7580	130	0	7580	130	8400.62	370.375	383.625	mixed marine lacustrine facies	1	corr	text says gyttia; table says plant detritus	lacustrine sediment	transitional sediment	negative	n/a	n/a	n/a	nd	nd	nd	nd	0	0.1	0	0	0	0	0.702238	0	0.1	0	1	0	nd	1993	21.55	MTL	midpoint	1.2301	1.2301	-0.357068
530	T-4868A	Corner and Haugane 1993	2	Troms, Lyngen; L5 basin	69.757	19.97	1	8960	130	0	8960	130	10085	399	530	brackish facies	1	corr	gyttja	lacustrine sediment	marine sediment	negative	n/a	n/a	n/a	nd	nd	nd	nd	0	0.1	0	0	0	0	0.759	0	0.1	0	1	0	nd	1993	25.9	MTL	midpoint	1.26336	1.26336	-0.357068
531	T-5191A	Corner and Haugane 1993	2	Vanna; S1 basin	70.1673	19.81	1	3680	180	0	3680	180	4129.17	442.833	662.167	mixed marine lacustrine facies	1	corr	gyttja	lacustrine gyttja	marine sediment	negative	n/a	n/a	n/a	nd	nd	nd	nd	0	0.1	0	0	0	0	0.5	0	0.1	0	1	0	nd	1993	7.8	MTL	midpoint	1.12694	1.12694	-0.372077
532	T-5160A	Corner and Haugane 1993	2	Vanna; S4 basin	70.1458	19.8	1	8200	160	0	8200	160	9305.33	223.667	664.333	transitional facies	1	corr	gyttja	lacustrine gyttja	diverse facies	negative	n/a	n/a	n/a	nd	nd	nd	nd	0	0.1	0	0	0	0	0.950416	0	0.1	0	1	0	nd	1993	46.3	MTL	midpoint	1.38683	1.38683	-0.371948
533	T-5159B	Corner and Haugane 1993	2	Vanna; V1 basin	70.2147	19.6809	1	11480	290	0	11480	290	13451	561	676	transitional facies	0	corr	plant detritus	diverse facies	marine facies	negative	n/a	n/a	n/a	nd	nd	nd	nd	0	0.1	0	0	0	0	0.963191	0	0.1	0	1	0	nd	1993	46.3	MTL	midpoint	1.39561	1.39561	-0.371948
534	T-8818A	Prosch-Danielsen 1993	2	Fjoloy; Vann v/Torvmyra	59.0961	5.57852	1	7860	150	0	7860	150	8858.3	403.7	517.3	brackish facies	1	corr	not reported; assumed bulk sediment	nd	marine gyttja	negative	n/a	n/a	n/a	nd	nd	nd	nd	0	0.1	0	0	0	0	0.740128	0	0.1	0	1	0	nd	1993	24	MTL	midpoint	1.25211	1.25211	-0.31458
535	T-8818B	Prosch-Danielsen 1993	2	Fjoloy; Vann v/Torvmyra	59.0961	5.57852	1	7760	160	0	7760	160	8639.83	445.167	460.833	brackish facies	1	corr	not reported; assumed bulk sediment	nd	marine gyttja	negative	n/a	n/a	n/a	nd	nd	nd	nd	0	0.1	0	0	0	0	0.740128	0	0.1	0	1	0	nd	1993	24	MTL	midpoint	1.25211	1.25211	-0.37178
536	T-9131A	Prosch-Danielsen 1993 (as in Helle et al 2007 )	2	Rennesoy; Sore reianes	59.0866	5.64	1	10420	110	0	10420	110	12314	403	545	gyttja-rich lacustrine-brackish. Sediments	1	corr	not reported; assumed bulk sediment	lake sediments	marine sediments	negative	n/a	n/a	n/a	nd	nd	nd	nd	0	0.1	0	0	0	0	2	0	0.1	0	1	0	nd	1993	27	MTL	midpoint	2.24054	2.24054	-0.369847
537	T-8817A	Prosch-Danielsen 1993 (as in Glorstad et al 2016 )	2	Rennesoy; Sore reianes	59.1214	5.59	1	9665	135	0	9665	135	10972.4	631.625	466.375	brackish gyttja	1	corr	not reported; assumed bulk sediment	lacustrine gyttja	marine gyttja	negative	n/a	n/a	n/a	nd	nd	nd	nd	0	0.1	0	0	0	0	0.644143	0	0.1	0	1	0	nd	1993	14.4	MTL	midpoint	1.19788	1.19788	-0.426675
538	T-8817B	Prosch-Danielsen 1993 (as in Glorstad et al 2016 )	2	Rennesoy; Sore reianes	59.1214	5.59	1	9605	105	0	9605	105	11029.4	231.625	517.375	brackish gyttja	1	corr	not reported; assumed bulk sediment	lacustrine gyttja	marine gyttja	negative	n/a	n/a	n/a	nd	nd	nd	nd	0	0.1	0	0	0	0	0.644143	0	0.1	0	1	0	nd	1993	14.4	MTL	midpoint	1.19788	1.19788	-0.423456
539	T-3301A	Prosch-Danielsen 1993 (as in Helle et al 2007 )	2	Stavanger; kulebergmyra	58.9908	5.6	1	10820	150	0	10820	150	12795	366	602	gyttja-rich lake sediments	1	corr	not reported; assumed bulk sediment	lacustrine gyttja	marine gyttja	negative	n/a	n/a	n/a	nd	nd	nd	nd	0	0.1	0	0	0	0	0.655	0	0.1	0	1	0	nd	1993	15.5	MTL	midpoint	1.20375	1.20375	-0.423456
540	T-9131B	Prosch-Danielsen 1993 (as in prosch-danielsen 2006)	2	Rennesoy; kadastemmen	59.0859	5.64	1	10235	140	0	10235	140	12233.9	373.083	910.917	brackish gyttja	1	corr	not reported; assumed bulk sediment			negative	n/a	n/a	n/a	nd	nd	nd	nd	0	0.1	0	0	0	0	2	0	0.1	0	1	0	nd	1993	27	MTL	midpoint	2.24054	2.24054	-0.423456
541	T-8819	Prosch-Danielson 1993 (as in Midtbo et al 2011)	2	Rennesoy	59.0415	5.65	1	5285	105	0	5285	105	6051.25	241.75	287.25	hummus layer	0	corr	shore meadow plants	beach sediments	beach sediments	nd	n/a	n/a	n/a	nd	nd	nd	nd	0	0.1	0	0	0	0	0.601591	0	0.1	0	1	0	nd	1993	10.5	MTL	midpoint	1.17555	1.17555	-0.423456
542	T-9181B	Prosch-Danielsen 1993 (as in prosch-danielsen 2006)	2	Rennesoy; Brimse	59.0828	5.82	1	9595	360	0	9595	360	10714.2	1722.75	819.25	lacustrine gyttja	1	corr	not reported; assumed bulk sediment	lacustrine gyttja	marine gyttja	negative	n/a	n/a	n/a	nd	nd	nd	nd	0	0.1	0	0	0	0	0.638201	0	0.1	0	1	0	nd	1993	13.8	MTL	midpoint	1.1947	1.1947	-0.430802
543	T-9750A	Prosch-Danielsen 1993 (as in prosch-danielsen 2006)	2	Rennesoy; Jubemyr	59.1158	5.8	1	9170	100	0	9170	100	10403.5	312.5	495.5	lacustrine gyttja	1	corr	not reported; assumed bulk sediment	lacustrine gyttja	marine gyttja	negative	n/a	n/a	n/a	nd	nd	nd	nd	0	0.1	0	0	0	0	0.5	0	0.1	0	1	0	nd	1993	6.7	MTL	midpoint	1.12694	1.12694	-0.430802
544	T-9751A	Prosch-Danielsen 1993 (as in prosch-danielsen 2006)	2	Rennesoy; Jubemyr	59.1158	5.8	1	7825	85	0	7825	85	8626.12	369.875	226.125	lacustrine gyttja	1	corr	not reported; assumed bulk sediment	marine gyttja	lacustrine gyttja	positive	n/a	n/a	n/a	nd	nd	nd	nd	0	0.1	0	0	0	0	0.5	0	0.1	0	1	0	nd	1993	6.7	MTL	midpoint	1.12694	1.12694	-0.432133
545	T-9751B	Prosch-Danielsen 1993 (as in prosch-danielsen 2006)	2	Rennesoy; Jubemyr	59.1158	5.8	1	8050	100	0	8050	100	8900	502	349	lacustrine gyttja	1	corr	not reported; assumed bulk sediment	marine gyttja	lacustrine gyttja	positive	n/a	n/a	n/a	nd	nd	nd	nd	0	0.1	0	0	0	0	0.5	0	0.1	0	1	0	nd	1993	6.7	MTL	midpoint	1.12694	1.12694	-0.430796
546	T-9752B	Prosch-Danielsen 1993 (as in prosch-danielsen 2006)	2	Rennesoy; Jubemyr	59.1158	5.8	1	4030	80	0	4030	80	4659.67	181.333	505.667	lacustrine gyttja	1	corr	not reported; assumed bulk sediment	lacustrine gyttja	marine gyttja	negative	n/a	n/a	n/a	nd	nd	nd	nd	0	0.1	0	0	0	0	0.5	0	0.1	0	1	0	nd	1993	6.7	MTL	midpoint	1.12694	1.12694	-0.430796
547	T-9752A	Prosch-Danielsen 1993 (as in prosch-danielsen 2006)	2	Rennesoy; Jubemyr	59.1158	5.8	1	4120	165	0	4120	165	4567	711	477	lacustrine gyttja	1	corr	not reported; assumed bulk sediment	lacustrine gyttja	marine gyttja	negative	n/a	n/a	n/a	nd	nd	nd	nd	0	0.1	0	0	0	0	0.5	0	0.1	0	1	0	nd	1993	6.7	MTL	midpoint	1.12694	1.12694	-0.430796
548	T-7358A	Flatekval 1991 (as in Helle et al 2007)	2	Rogaland; Tau-36	59.0883	5.91	1	10020	210	0	10020	210	11654.2	826.75	860.25	gyttja-rich lacustrine-brackish. Sediments	1	corr	not reported; assumed bulk sediment	lacustrine gyttja	marine gyttja	negative	n/a	n/a	n/a	nd	nd	nd	nd	0	0.1	0	0	0	0	0.860204	0	0.1	0	1	0	nd	1991	36	MTL	midpoint	1.32663	1.32663	-0.961834
549	T-7359A	Anundsen 1985 (also in Flatekval 1991 and Helle et al 2007)	2	Rogaland; Yrkje; Tau-36	59.0883	5.91	1	10370	140	0	10370	140	12221.5	496.5	807.5	gyttja-rich lacustrine-brackish. Sediments	1	corr	not reported; assumed bulk sediment	marine gyttja	lacustrine gyttja	positive	n/a	n/a	n/a	nd	nd	nd	nd	0	0.1	0	0	0	0	0.860204	0	0.1	0	1	0	nd	1991	36	MTL	midpoint	1.32663	1.32663	-0.961834
550	T-8016A	Flatekval 1991 (as in Helle et al 2007)	2	Rogaland; Tau-30	59.0933	5.93	1	10410	140	0	10410	140	12334.1	394.875	685.125	gyttja-rich lacustrine-brackish. Sediments	1	corr	not reported; assumed bulk sediment	marine gyttja	lacustrine gyttja	positive	n/a	n/a	n/a	nd	nd	nd	nd	0	0.1	0	0	0	0	0.8	0	0.1	0	1	0	nd	1991	30	MTL	midpoint	1.28841	1.28841	-0.962011
551	T-8012A	Flatekval 1991 (as in Helle et al 2007)	2	Rogaland; Tau-28	59.088	5.91	1	9570	70	0	9570	70	10911.8	297.25	337.75	gyttja-rich marine sediments	1	corr	not reported; assumed bulk sediment	marine gyttja	marine gyttja	negative	n/a	n/a	n/a	nd	nd	nd	nd	0	0.1	0	0	0	0	0.780204	0	0.1	0	1	0	nd	1991	28	MTL	midpoint	1.27621	1.27621	-0.961682
552	T-8018A	Flatekval 1991 (as in Helle et al 2007)	2	Rogaland; Tau-28	59.088	5.91	1	11390	100	0	11390	100	13254	330	243	gyttja-rich marine sediments	1	corr	not reported; assumed bulk sediment	marine gyttja	marine gyttja	negative	n/a	n/a	n/a	nd	nd	nd	nd	0	0.1	0	0	0	0	0.78	0	0.1	0	1	0	nd	1991	28	MTL	midpoint	1.27609	1.27609	-0.956352
553	T-8220A	Flatekval 1991 (as in Helle et al 2007)	2	Rogaland; Tau-28	59.088	5.91	1	13330	150	0	13330	150	16030.5	558.5	521.5	gyttja-rich marine sediments	1	corr	not reported; assumed bulk sediment	marine gyttja	marine gyttja	negative	n/a	n/a	n/a	nd	nd	nd	nd	0	0.1	0	0	0	0	0.78	0	0.1	0	1	0	nd	1991	28	MTL	midpoint	1.27609	1.27609	-0.956352
554	T-8185A	Svendsen and Mangerud 1990	2	Leinoy; Froystadmyra I	62.3286	5.71	1	8140	220	0	8140	220	9022.7	515.3	567.7	coarse tsunami sand	1	corr	lacustrine gyttja	negative	lacustrine sediment	negative	4.9	n/a	n/a	nd	nd	nd	nd	0	0.1	0	0	0	0	0.5	0	0.1	0	1	0	nd	1990	6.2	MTL	midpoint	1.12694	1.12694	-0.955004
555	T-4967A	Svendsen and Mangerud 1990	2	Leinoy; Froystadmyra I	62.3286	5.71	1	8480	320	0	8480	320	9425	833	870	coarse organic layer	1	corr	lacustrine gyttja	silty sediment	lacustrine sediments	negative	4.92	n/a	n/a	nd	nd	nd	nd	0	0.1	0	0	0	0	0.5	0	0.1	0	1	0	nd	1990	6.2	MTL	midpoint	1.12694	1.12694	-0.955317
556	T-4966A	Svendsen and Mangerud 1990	2	Leinoy; Froystadmyra I	62.3286	5.71	1	10510	380	0	10510	380	12198.2	962.75	996.25	silt and clay	1	corr	brackish sediment	laminated silt	gravel and stones	negative	4.95	n/a	n/a	nd	nd	nd	nd	0	0.1	0	0	0	0	0.5	0	0.1	0	1	0	nd	1990	6.2	MTL	midpoint	1.12694	1.12694	-0.991683
557	T-4969A	Svendsen and Mangerud 1990	2	Leinoy; Froystadmyra I	62.3286	5.71	1	10980	320	0	10980	320	13035.8	542.25	1091.75	silty clay	1	corr	brackish sediment	volcanic ash	silt and clay	negative	5.3	n/a	n/a	nd	nd	nd	nd	0	0.1	0	0	0	0	0.5	0	0.1	0	1	0	nd	1990	6.2	MTL	midpoint	1.12694	1.12694	-0.386892
558	T-4968IIA	Svendsen and Mangerud 1990	2	Leinoy; Froystadmyra II	62.3329	5.72	1	12410	180	0	12410	180	14575	689	714	lacustrine facies	1	corr	lacustrine gyttja	transitional facies	marine sediment	negative	5.2	n/a	n/a	nd	nd	nd	nd	0	0.1	0	0	0	0	0.680374	0	0.1	0	1	0	nd	1990	18	MTL	midpoint	1.21775	1.21775	-0.386892
559	T-5146A	Svendsen and Mangerud 1990	2	Leinoy; Froystadmyra III	62.3231	5.7	1	12220	370	0	12220	370	14298	1187	942	silty gyttja	1	corr	lacustrine gyttja	silty gyttja	silt and clay	negative	7.6	n/a	n/a	nd	nd	nd	nd	0	0.1	0	0	0	0	0.721131	0	0.1	0	1	0	nd	1990	23	MTL	midpoint	1.24098	1.24098	-0.386892
560	T-5145A	Svendsen and Mangerud 1990	2	Bergsoy; Kulturmyra	62.3307	5.65	1	10500	140	0	10500	140	12295.6	454.429	472.571	gyttja	1	corr	lacustrine gyttja	gyttja	siltt and clay	negative	5.6	n/a	n/a	nd	nd	nd	nd	0	0.1	0	0	0	0	0.5	0	0.1	0	1	0	nd	1990	2.5	MTL	midpoint	1.12694	1.12694	-0.399538
561	T-5149	Svendsen and Mangerud 1990	2	Bergsoy; Kulturmyra	62.3307	5.65	1	13020	270	0	13020	270	15573	904	1124	marine sediments	1	corr	marine sediment	gyttja	marine sediments	negative	8.25	n/a	n/a	nd	nd	nd	nd	0	0.1	0	0	0	0	0.5	0	0.1	0	1	0	nd	1990	2.5	MTL	midpoint	1.12694	1.12694	-0.386745
562	T-5150	Svendsen and Mangerud 1990	2	Bergsoy; Kulturmyra	62.3318	5.64	1	12530	240	440	12530	240	14632	941	607	marine sediments	2	corr	marine shells	marine sediments	marine sediments	negative	8.15	n/a	n/a	nd	nd	nd	nd	0	0.1	0	0	0	0	0.5	0	0.1	0	1	0	nd	1990	2.5	MTL	midpoint	1.12694	1.12694	-0.386745
563	T-5147A	Svendsen and Mangerud 1990	2	Gurskoy; skolemyra	62.3357	5.64232	1	12090	200	0	12090	200	13271	512	488	lacustrine gyttja	1	corr	lacustrine gyttja	lacustrine gyttja	marine sediments	negative	5.63	n/a	n/a	nd	nd	nd	nd	0	0.1	0	0	0	0	0.624372	0	0.1	0	1	0	nd	1990	12.4	MTL	midpoint	1.18737	1.18737	-0.399619
564	T-5148A	Svendsen and Mangerud 1990	2	Gurskoy; litlevatn	62.2793	5.81611	1	11510	240	0	11510	240	13376.8	630.167	529.833	lacustrine gyttja	1	corr	laccustrine gyttja	lacustrine gyttja	marine sediments	negative	7.21	n/a	n/a	nd	nd	nd	nd	0	0.1	0	0	0	0	0.692405	0	0.1	0	1	0	nd	1990	19.2	MTL	midpoint	1.22451	1.22451	-0.380361
565	T-8352A	Thomsen 1989	2	Karsto vest; Eikjetjorna	59.2978	5.48	1	9600	210	0	9600	210	10960.5	720.5	709.5	lacustrine gyttja	1	corr	not reported; assumed bulk sediment	lacustrine gyttja	marine gyttja	negative	n/a	n/a	n/a	nd	nd	nd	nd	0	0.1	0	0	0	0	0.5	0	0.1	0	1	0	nd	1989	5	MTL	midpoint	1.12694	1.12694	-0.373674
566	T-8353A	Thomsen 1989	2	Karsto vest; Eikjetjorna	59.2978	5.48	1	8060	220	0	8060	220	8874.67	591.333	421.667	marine gyttja	2	corr	not reported; assumed bulk sediment	marine gyttja	lacustrine gyttja	positive	n/a	n/a	n/a	nd	nd	nd	nd	0	0.1	0	0	0	0	0.5	0	0.1	0	1	0	nd	1989	5	MTL	midpoint	1.12694	1.12694	-0.37407
567	T-8354A	Thomsen 1989	2	Karsto vest; Eikjetjorna	59.2978	5.48	1	3330	110	0	3330	110	2829.5	394.5	422.5	lacustrine gyttja	1	corr	not reported; assumed bulk sediment	lacustrine gyttja	marine gyttja	negative	n/a	n/a	n/a	nd	nd	nd	nd	0	0.1	0	0	0	0	0.5	0	0.1	0	1	0	nd	1989	5	MTL	midpoint	1.12694	1.12694	-0.37407
568	T-8347B	Thomsen 1989 (as in Helle et al 2007)	2	Karsto; vestre stolsmyra	59.2987	5.53	1	10280	140	0	10280	140	12234.4	384.643	836.357	Gyttja-rich lake sediments	1	corr	not reported; assumed bulk sediment	lacustrine gyttja	marine gyttja	negative	n/a	n/a	n/a	nd	nd	nd	nd	0	0.1	0	0	0	0	0.785185	0	0.1	0	1	0	nd	1989	28.5	MTL	midpoint	1.27926	1.27926	-0.37407
569	T-8355A	Thomsen 1989 (as in Helle et al 2007)	2	Karsto; Hedlamyr	59.2886	5.48	1	9560	130	0	9560	130	10908.8	354.25	504.75	Gyttja-rich lake sediments	1	corr	not reported; assumed bulk sediment	lacustrine gyttja	marine gyttja	negative	n/a	n/a	n/a	nd	nd	nd	nd	0	0.1	0	0	0	0	0.726471	0	0.1	0	1	0	nd	1989	23	MTL	midpoint	1.24409	1.24409	-0.442874
570	T-8356A	Thomsen 1989 (as in Helle et al 2007)	2	Karsto; Hedlamyr	59.2886	5.48	1	12250	250	0	12250	250	14310.7	887.333	713.667	Gyttja-rich brackish-marine sediments	1	corr	not reported; assumed bulk sediment	marine gyttja	lacustrine gyttja	positive	n/a	n/a	n/a	nd	nd	nd	nd	0	0.1	0	0	0	0	0.726471	0	0.1	0	1	0	nd	1989	23	MTL	midpoint	1.24409	1.24409	-0.442874
571	T-8351A	Thomsen 1989 (as in Helle et al 2007)	2	Karsto; tysvaer; storavatnet	59.31	5.53	1	9060	160	0	9060	160	10156.9	501.1	596.9	Gyttja-rich lake sediments	1	corr	not reported; assumed bulk sediment	lacustrine gyttja	marine gyttja	negative	n/a	n/a	n/a	nd	nd	nd	nd	0	0.5	0	0	0	0	0.701375	0	0.1	0	1	0	nd	1989	20.5	MTL	midpoint	1.3236	1.3236	-0.442874
572	T-8348A	Thomsen 1989 (as in Helle et al 2007)	2	Ognoy; 9m lake	59.2642	5.47	1	10210	170	0	10210	170	12040.3	564.688	773.312	lacustrine gyttja	1	corr	not reported; assumed bulk sediment	marine gyttja	lacustrine gyttja	negative	n/a	n/a	n/a	nd	nd	nd	nd	0	0.1	0	0	0	0	0.780161	0	0.1	0	1	0	nd	1989	28	MTL	midpoint	1.27619	1.27619	-0.441109
573	T-7172A	Thomsen 1989 (as in Helle et al 2007)	2	Ognoy; Krovatnmyra	59.2482	5.46	1	8890	150	0	8890	150	9886.67	516.333	349.667	lacustrine gyttja	1	corr	not reported; assumed bulk sediment	marine gyttja	lacustrine gyttja	negative	n/a	n/a	n/a	nd	nd	nd	nd	0	0.1	0	0	0	0	0.656568	0	0.1	0	1	0	nd	1989	16	MTL	midpoint	1.20461	1.20461	-0.441109
574	T-7173A	Thomsen 1989 (as in Helle et al 2007)	2	Ognoy; Varanesvatnet	59.2509	5.46	1	10100	280	marine	10100	280	11457.2	1218.75	646.25	lacustrine gyttja	2	corr	not reported; assumed bulk sediment	marine gyttja	lacustrine gyttja	negative	n/a	n/a	n/a	nd	nd	nd	nd	0	0.1	0	0	0	0	0.5	0	0.1	0	1	0	nd	1988	7.5	MTL	midpoint	1.12694	1.12694	-0.441109
575	T-7174A	Thomsen 1989 (as in Helle et al 2007)	2	Ognoy; Varanesvatnet	59.2509	5.46	1	6320	150	0	6320	150	6410	432	429	lacustrine gyttja	1	corr	not reported; assumed bulk sediment	lacustrine gyttja	marine gyttja	positive	n/a	n/a	n/a	nd	nd	nd	nd	0	0.1	0	0	0	0	0.5	0	0.1	0	1	0	nd	1988	7.5	MTL	midpoint	1.12694	1.12694	-0.445022
576	T-7175A	Thomsen 1989 (as in Helle et al 2007)	2	Ognoy; Varanesvatnet	59.2509	5.46	1	3980	110	0	3980	110	4346.5	492.5	348.5	lacustrine gyttja	1	corr	not reported; assumed bulk sediment	lacustrine gyttja	lacustrine gyttja	negative	n/a	n/a	n/a	nd	nd	nd	nd	0	0.1	0	0	0	0	0.5	0	0.1	0	1	0	nd	1988	7.5	MTL	midpoint	1.12694	1.12694	-0.445022
577	T-3581A	Kaland 1988 (as in Helle et al 2007 )	2	Randoy; Randoy-52	59.1889	6.05	1	10980	100	0	10980	100	12889.3	267.667	164.333	gyttja-rich lacustrine sediments	1	corr	not reported; assumed bulk sediment	lacustrine gyttja	lacustrine gyttja	negative	n/a	n/a	n/a	nd	nd	nd	nd	0	0.1	0	0	0	0	0.758032	0	0.1	0	1	0	nd	1988	52	MTL	midpoint	1.26278	1.26278	-0.985161
578	T-3580A	Kaland 1988 (as in Helle et al 2007 )	2	Randoy; Randoy-52	59.1889	6.05	1	11300	90	0	11300	90	13231	224	308	gyttja-rich lacustrine sediments	1	corr	not reported; assumed bulk sediment	lacustrine gyttja	lacustrine gyttja	negative	n/a	n/a	n/a	nd	nd	nd	nd	0	0.1	0	0	0	0	0.758032	0	0.1	0	1	0	nd	1988	52	MTL	midpoint	1.26278	1.26278	-0.985161
579	T-3579A	Kaland 1988 (as in Helle et al 2007 )	2	Randoy; Randoy-52	59.1889	6.05	1	11770	130	0	11770	130	13599	422	274	gyttja-rich lacustrine sediments	1	corr	not reported; assumed bulk sediment	lacustrine gyttja	lacustrine gyttja	negative	n/a	n/a	n/a	nd	nd	nd	nd	0	0.1	0	0	0	0	0.758032	0	0.1	0	1	0	nd	1988	52	MTL	midpoint	1.26278	1.26278	-0.985161
580	T-7569A	Kaland 1988 (as in Helle et al 2007 )	2	Randoy; Lauhildrane-49	59.1906	6.04	1	9580	80	0	9580	80	10939.8	286.167	366.833	Gyttja-rich lake sediments	1	corr	not reported; assumed bulk sediment	lacustrine gyttja	marine gyttja	negative	n/a	n/a	n/a	nd	nd	nd	nd	0	0.1	0	0	0	0	0.987068	0	0.1	0	1	0	nd	1988	49.1	MTL	midpoint	1.4122	1.4122	-0.985161
581	T-7568A	Kaland 1988 (as in Helle et al 2007 )	2	Randoy; Lauhildrane-49	59.1906	6.04	1	10670	120	0	10670	120	12596	321	592	gyttja-rich lacustrine-brackish. Sediments	1	corr	not reported; assumed bulk sediment	marine gyttja	lacustrine gyttja	positive	n/a	n/a	n/a	nd	nd	nd	nd	0	0.1	0	0	0	0	0.991239	0	0.1	0	1	0	nd	1988	49.1	MTL	midpoint	1.41512	1.41512	-1.60985
582	T-7570A	Kaland 1988 (as in Helle et al 2007 )	2	Randoy; Lauhildrane-49	59.1906	6.04	1	11710	130	0	11710	130	13634.5	377.5	391.5	gyttja-rich lacustrine-brackish. Sediments	1	corr	not reported; assumed bulk sediment	lacustrine gyttja	lacustrine gyttja	positive	n/a	n/a	n/a	nd	nd	nd	nd	0	0.1	0	0	0	0	0.987068	0	0.1	0	1	0	nd	1988	49.1	MTL	midpoint	1.4122	1.4122	-1.60985
583	T-7572A	Kaland 1988 (as in Helle et al 2007 )	2	Randoy; Liarmarka-32	59.1912	6.08	1	9640	90	0	9640	90	10969.8	296.25	390.75	gyttja-rich lacustrine-brackish. Sediments	1	corr	not reported; assumed bulk sediment	lacustrine gyttja	marine gyttja	negative	n/a	n/a	n/a	nd	nd	nd	nd	0	0.1	0	0	0	0	0.820256	0	0.1	0	1	0	nd	1988	32	MTL	midpoint	1.30108	1.30108	-1.60985
584	T-7571A	Kaland 1988 (as in Helle et al 2007 )	2	Randoy; Liarmarka-32	59.1912	6.08	1	12150	180	0	12150	180	14028.5	906.5	427.5	gyttja-rich marine sediments	1	corr	not reported; assumed bulk sediment	marine gyttja	marine gyttja	negative	n/a	n/a	n/a	nd	nd	nd	nd	0	0.1	0	0	0	0	0.82	0	0.1	0	1	0	nd	1988	32	MTL	midpoint	1.30092	1.30092	-1.60985
585	T-5050A	Vorren et al 1988	2	Andoya; Aerasvatnet	69.2616	16.0486	1	12120	110	0	12120	110	13961.2	856.75	355.25	organic silt and sand	1	corr	gelatinous organic silt	organic rich silt	organic rich silt	negative	1.5	nd	nd	piston corer	nd	nd	nd	0	0.1	0	0	0	0	0.930443	0	0.1	0	1	0	nd	1988	44	MTL	midpoint	1.37322	1.37322	-1.60985
586	T-5050B	Vorren et al 1988	2	Andoya; Aerasvatnet	69.2616	16.0486	1	13300	320	0	13300	320	15989.5	1034.5	953.5	organic silt and sand	1	corr	gelatinous organic silt	organic rich silt	organic rich silt	negative	1.5	nd	nd	piston corer	nd	nd	nd	0	0.1	0	0	0	0	0.930443	0	0.1	0	1	0	nd	1988	44	MTL	midpoint	1.37322	1.37322	-1.60985
587	T-5579	Vorren et al 1988	2	Andoya; Aerasvatnet	69.2616	16.0486	1	14240	250	0	14240	250	17295.5	809.5	651.5	organic silt	0	corr	macro-algae	organic rich silt	marine silt	negative	2	nd	nd	piston corer	nd	nd	nd	0	0.1	0	0	0	0	0.940147	0	0.1	0	1	0	nd	1988	44	MTL	midpoint	1.37981	1.37981	-1.60985
588	T-5580	Vorren et al 1988	2	Andoya; Aerasvatnet	69.2616	16.0486	1	16150	330	0	16150	330	19586	719	766	marine silt	0	corr	macro-algae	organic rich laminae	laminated silt with pebbles	negative	2.3	nd	nd	piston corer	nd	nd	nd	0	0.1	0	0	0	0	0.928521	0	0.1	0	1	0	nd	1988	44	MTL	midpoint	1.37191	1.37191	-1.60985
589	T-6415	Schanche 1988	2	Varangerfjord; Mortensnes; Fornm. 2 R10	70.1297	29.0072	1	8500	120	0	8500	120	9406.75	473.25	373.75	cultural layer	0		ubest.tre	nd	nd	negative	nd	nd	nd	by hand	nd	nd	nd	0	0.1	0	0	0	0	2	0	0.1	0	1	0	nd	1988	39	MTL	midpoint	2.24054	2.24054	-1.60985
590	T-6416	Schanche 1988	2	Varangerfjord; Mortensnes; Fornm. 8 R12	70.1297	29.0072	1	5770	190	0	5770	190	6626.25	527.75	599.25	cultural layer	0		birch/pine	nd	nd	negative	nd	nd	nd	by hand	nd	nd	nd	0	0.1	0	0	0	0	2	0	0.1	0	1	0	nd	1988	25.5	MTL	midpoint	2.24054	2.24054	-1.60985
591	T-6418	Schanche 1988	2	Varangerfjord; Mortensnes; Fornm. 8 R12	70.1297	29.0072	1	3860	200	0	3860	200	4133	695	432	cultural layer	0		ubest.rot	nd	nd	negative	nd	nd	nd	by hand	nd	nd	nd	0	0.1	0	0	0	0	2	0	0.1	0	1	0	nd	1988	25.5	MTL	midpoint	2.24054	2.24054	-1.60985
592	T-7219	Schanche 1988	2	Varangerfjord; Mortensnes; Fornm. 6 R12	70.1297	29.0072	1	5700	90	0	5700	90	6474.5	250.5	185.5	cultural layer	0		birch	nd	nd	negative	nd	nd	nd	by hand	nd	nd	nd	0	0.1	0	0	0	0	2	0	0.1	0	1	0	nd	1988	25.5	MTL	midpoint	2.24054	2.24054	-1.60985
593	T-7220	Schanche 1988	2	Varangerfjord; Mortensnes; Fornm. 6 R12	70.1297	29.0072	1	4800	120	0	4800	120	5439.5	450.5	384.5	cultural layer	0		birch	nd	nd	negative	nd	nd	nd	by hand	nd	nd	nd	0	0.1	0	0	0	0	2	0	0.1	0	1	0	nd	1988	25.5	MTL	midpoint	2.24054	2.24054	-1.26237
594	T-7741	Schanche 1988	2	Varangerfjord; Mortensnes; Fornm. 59 R3	70.1297	29.0072	1	3730	110	0	3730	110	4069.33	343.667	346.333	cultural layer	0		birch	nd	nd	negative	nd	nd	nd	by hand	nd	nd	nd	0	0.1	0	0	0	0	3	0	0.1	0	1	0	nd	1988	16	MTL	midpoint	3.16544	3.16544	-1.21706
595	T-7742	Schanche 1988	2	Varangerfjord; Mortensnes; Fornm. 59 R3	70.1297	29.0072	1	3060	120	marine	3060	120	3170.5	374.5	303.5	cultural layer	2		seal leg	nd	nd	negative	nd	nd	nd	by hand	nd	nd	nd	0	0.1	0	0	0	0	3	0	0.1	0	1	0	nd	1988	16	MTL	midpoint	3.16544	3.16544	-1.30172
596	T-7740	Schanche 1988	2	Varangerfjord; Mortensnes; Fornm. 59 R3	70.1297	29.0072	1	3360	110	0	3360	110	2829	357	355	cultural layer	0		birch	nd	nd	negative	nd	nd	nd	by hand	nd	nd	nd	0	0.1	0	0	0	0	3	0	0.1	0	1	0	nd	1988	16	MTL	midpoint	3.16544	3.16544	-1.31851
597	T-674	Schanche 1988	2	Varangerfjord; Mortensnes; Fornm. 10 R4	70.1297	29.0072	1	2150	150	0	2150	150	2102	577	394	cultural layer	0		ubest.tre	nd	nd	negative	nd	nd	nd	by hand	nd	nd	nd	0	0.1	0	0	0	0	1.5	0	0.1	0	1	0	nd	1988	14.5	MTL	midpoint	1.80831	1.80831	-1.44943
598	T-673	Schanche 1988	2	Varangerfjord; Mortensnes; Fornm. 26 R3	70.1297	29.0072	1	600	70	0	600	70	582.75	97.25	101.75	cultural layer	0		ubest.tre	nd	nd	negative	nd	nd	nd	by hand	nd	nd	nd	0	0.1	0	0	0	0	3	0	0.1	0	1	0	nd	1988	16	MTL	midpoint	3.16544	3.16544	-1.02502
599	T-675	Schanche 1988	2	Varangerfjord; Mortensnes; Grav 2 R3	70.1297	29.0072	1	2420	120	0	2420	120	2550.25	203.75	422.25	cultural layer	0		ubest.tre	nd	nd	negative	nd	nd	nd	by hand	nd	nd	nd	0	0.1	0	0	0	0	3	0	0.1	0	1	0	nd	1988	16	MTL	midpoint	3.16544	3.16544	-1.02502
600	T-6417	Schanche 1988	2	Varangerfjord; Mortensnes; 2m i R17	70.1297	29.0072	1	1080	70	0	1080	70	1001	174	218	cultural layer	0		birch	nd	nd	negative	nd	nd	nd	by hand	nd	nd	nd	0	0.1	0	0	0	0	3	0	0.1	0	1	0	nd	1988	6.5	MTL	midpoint	3.16544	3.16544	-1.05507
601	T-6895	Moller 1987	2	Svartisen	67.0374	14.02	1	5650	60	0	5650	60	6441	160	139	tombola terrace	2	corr	cerastoderma edule	sand bed	nd	negative	n/a	n/a	n/a	nd	nd	nd	nd	0	0.1	0	0	0	0	0.75	0	0.1	0	1	0	nd	nd	25	MTL	midpoint	1.25797	1.25797	-1.05507
602	T-5655	Moller 1987	2	Finnmark; Sandstrand	68.679	16.78	1	4010	80	0	4010	80	3839	258	261	nd	2	corr	shells	nd	nd	nd	n/a	n/a	n/a	nd	nd	nd	nd	0	0.1	0	0	0	0	0.653215	0	0.1	0	1	0	nd	1984	16.5	MTL	midpoint	1.20278	1.20278	-1.08342
603	T-5654	Moller 1987	2	Finnmark; Lavangen	68.7959	17.72	1	6150	110	0	6150	110	6283.5	285.5	302.5	nd	2	corr	shells	nd	nd	nd	nd	nd	n/a	nd	nd	nd	nd	0	0.1	0	0	0	0	0.6047	0	0.1	0	1	0	nd	1984	12	MTL	midpoint	1.17714	1.17714	-1.08343
604	T-2742	Olson (personal comm.) (as in Moller 1987)	2	Troms; Grunnfjorden	69.9852	19.5421	1	1220	50		1220	50	540.5	235.5	271.5	cultural layer	1		charcoal (birch)	nd	nd	nd	nd	nd	n/a	nd	nd	nd	nd	0	0	0	0	0	0	0.5	0	0.1	0	1	0	nd	1987	3.1	MTL	midpoint	1.1225	1.1225	-1.07528
605	T-5393	Sandmo personal comm. (as in Moller 1987)	2	Troms; Simavik	69.8343	19.0089	1	9200	200		9200	200	10511.2	575.75	822.25	cultural layer	1		charcoal	nd	nd	nd	nd	nd	n/a	nd	nd	nd	nd	0	0	0	0	0	0	0.783017	0	0.1	0	1	0	nd	1987	30	MTL	midpoint	1.27402	1.27402	-1.08651
606	T-2202	Reymert personal comm. (as in Moller 1987)	2	Troms; Ytre Elgnes	68.9178	16.2686	1	2080	110		2080	110	2147.75	213.25	545.75	cultural layer	1		charcoal	nd	nd	nd	nd	nd	n/a	nd	nd	nd	nd	0	0	0	0	0	0	0.803013	0	0.1	0	1	0	nd	1987	31.5	MTL	midpoint	1.2864	1.2864	-1.02493
607	T-2201	Reymert personal comm. (as in Moller 1987)	2	Troms; Ytre Elgnes	68.9178	16.2686	1	1220	60		1220	60	1119.5	225.5	316.5	cultural layer	1		charcoal	nd	nd	nd	nd	nd	n/a	nd	nd	nd	nd	0	0	0	0	0	0	0.803013	0	0.1	0	1	0	nd	1987	31.5	MTL	midpoint	1.2864	1.2864	-1.02493
608	T-5391	Sandmo personal comm. (as in Moller 1987)	2	Lofoten; Flakstad	68.1074	13.297	1	2110	80		2110	80	2161	190	446	cultural layer	1		charcoal	nd	nd	nd	nd	nd	n/a	nd	nd	nd	nd	0	0	0	0	0	0	0.5	0	0.1	0	1	0	nd	1987	4.5	MTL	midpoint	1.1225	1.1225	-1.02493
609	T-5392	Sandmo personal comm. (as in Moller 1987)	2	Lofoten; Flakstad	68.1074	13.297	1	2390	100		2390	100	2562.17	192.833	555.167	cultural layer	1		charcoal	nd	nd	nd	nd	nd	n/a	nd	nd	nd	nd	0	0	0	0	0	0	0.5	0	0.1	0	1	0	nd	1987	4.5	MTL	midpoint	1.1225	1.1225	-0.395738
610	T-4380	Svendsen and Mangerud 1987	2	Stette; Lillerestjonn	62.4839	6.51	1	12170	290	0	12170	290	14412.5	792.5	948.5	silty gyttja	1	corr	not reported; assumed bulk sediment	silty gyttja	marine sediments	negative	n/a	n/a	n/a	nd	nd	nd	nd	0	0.1	0	0	0	0	0.945481	0	0.1	0	1	0	nd	1987	44.5	MTL	midpoint	1.38345	1.38345	-0.395738
611	Vedde_ash	Svendsen and Mangerud 1987	2	Stette; Slettebakktjonn	62.4852	6.51	1	10600	150	0	10600	150	12359.8	533.25	477.75	ash bed	1	corr	not reported; assumed bulk sediment	silt	marine sediments	negative	n/a	n/a	n/a	nd	nd	nd	nd	0	0.1	0	0	0	0	0.845481	0	0.1	0	1	0	nd	1987	34.5	MTL	midpoint	1.31713	1.31713	-0.395738
612	Vedde_ash_interp	Svendsen and Mangerud 1987	2	Stette; Stettejonn	62.5214	6.64	1	10750	100	0	10750	100	12721.3	359.667	523.333	silt	1	corr	not reported; assumed bulk sediment	ash bed	marine sediments	negative	n/a	n/a	n/a	nd	nd	nd	nd	0	0.1	0	0	0	0	0.909442	0	0.1	0	1	0	nd	1987	40.9	MTL	midpoint	1.35908	1.35908	-0.406326
613	T-4379A	Svendsen and Mangerud 1987	2	Stette; Noretjonn	62.5091	6.63	1	10150	130	0	10150	130	11577.2	889.833	320.167	gyttja	1	corr	not reported; assumed bulk sediment	gyttja	marine sediments	negative	n/a	n/a	n/a	nd	nd	nd	nd	0	0.1	0	0	0	0	0.879475	0	0.1	0	1	0	nd	1987	37.9	MTL	midpoint	1.33921	1.33921	-0.406326
614	T-3983A	Svendsen and Mangerud 1987	2	Sula; Klingrevatn	62.4337	6.25	1	9710	180	0	9710	180	11016.7	790.333	514.667	lacustrine gyttja	1	corr	not reported; assumed bulk sediment	marine sediments	marine sediments	negative	n/a	n/a	n/a	nd	nd	nd	nd	0	0.1	0	0	0	0	0.5	0	0.1	0	1	0	nd	1987	5.5	MTL	midpoint	1.12694	1.12694	-0.406326
615	T-3984A	Svendsen and Mangerud 1987	2	Sula; Klingrevatn	62.4337	6.25	1	8220	90	0	8220	90	9114.25	408.75	339.25	lacustrine gyttja	1	corr	not reported; assumed bulk sediment	marine sediments	marine sediments	negative	n/a	n/a	n/a	nd	nd	nd	nd	0	0.1	0	0	0	0	0.5	0	0.1	0	1	0	nd	1987	5.5	MTL	midpoint	1.12694	1.12694	-1.05959
616	T-3982A	Svendsen and Mangerud 1987	2	Sula; Klingrevatn	62.4337	6.25	1	4240	120	0	4240	120	4760.67	534.333	345.667	lacustrine gyttja	1	corr	not reported; assumed bulk sediment	nd	marine sediments	negative	n/a	n/a	n/a	nd	nd	nd	nd	0	0.1	0	0	0	0	0.5	0	0.1	0	1	0	nd	1987	5.5	MTL	midpoint	1.12694	1.12694	-1.14011
617	T-7230A	Austad and Erichsen 1987 (as in Helle et al 2007)	2	Karmoy; Nordbomyra	59.3743	5.28	1	10910	180	0	10910	180	12894.2	404.75	424.25	gyttja-rich lacustrine sediments	1	corr	bulk gyttja	lacustrine gyttja	marine gyttja	positive	n/a	n/a	n/a	nd	nd	nd	nd	0	0.05	0	0	0	0	0.649919	0	0.1	0	1	0	nd	1987	14.98	MTL	midpoint	1.19787	1.19787	-0.655752
618	nd	Austad and Erichsen 1987 (as in Helle et al 2007)	2	Karmoy; Nordbomyra	59.3743	5.28	9	1000	50	0	1000	50	892.125	158.875	108.125	nd	0	corr	pollen	nd	nd	negative	n/a	n/a	n/a	nd	nd	nd	nd	0	0.05	0	0	0	0	0.649919	0	0.1	0	1	0	nd	1987	14.98	MTL	midpoint	1.19787	1.19787	-1.07835
619	T-7229A	Austad and Erichsen 1987 (as in Helle et al 2007)	2	Karmoy; Nordbomyra	59.3743	5.28	1	13020	290	0	13020	290	15580	916	1229	lacustrine-brackish silt	1	corr	bulk gyttja	lacustrine gyttja	marine gyttja	negative	n/a	n/a	n/a	nd	nd	nd	nd	0	0.05	0	0	0	0	0.649919	0	0.1	0	1	0	nd	1987	14.98	MTL	midpoint	1.19787	1.19787	-1.07835
620	T-6719A	Austad and Erichsen 1987 (as in Helle et al 2007)	2	North Karmoy; gunnarshaugvatn	59.3835	5.27	1	10330	180	0	10330	180	12259.4	435.625	858.375	gyttja-rich lacustrine sediments	1	corr	bulk gyttja	lacustrine gyttja	marine gyttja	negative	n/a	n/a	n/a	nd	nd	nd	nd	0	0.1	0	0	0	0	0.712123	0	0.1	0	1	0	nd	1987	21.2	MTL	midpoint	1.23577	1.23577	-1.07835
621	T-6718A	Austad and Erichsen 1987 (as in Helle et al 2007)	2	North Karmoy; gunnarshaugvatn	59.3835	5.27	1	10510	150	0	10510	150	12296.3	465.714	537.286	gyttja-rich lacustrine sediments	1	corr	bulk gyttja	marine gyttja	lacustrine gyttja	positive	n/a	n/a	n/a	nd	nd	nd	nd	0	0.1	0	0	0	0	0.712123	0	0.1	0	1	0	nd	1987	21.2	MTL	midpoint	1.23577	1.23577	-1.11736
622	T-6717A	Austad and Erichsen 1987 (as in Helle et al 2007)	2	North Karmoy; gunnarshaugvatn	59.3835	5.27	1	12420	210	0	12420	210	14593	710	785	gyttja-rich lacustrine sediments	1	corr	bulk gyttja	lacustrine gyttja	lacustrine gyttja	negative	n/a	n/a	n/a	nd	nd	nd	nd	0	0.1	0	0	0	0	0.708183	0	0.1	0	1	0	nd	1987	21.2	MTL	midpoint	1.2335	1.2335	-1.13237
623	T-3427	Kjemperud 1981 a,b, 1982, 1986	2	Trondheimsfjord; Eidsvatnet	63.73	9.83	1	2450	100	0	2450	100	2528.3	317.7	380.3	fine detritus gyttja (assumed)	1	corr	not reported; assumed bulk sediment	fine detritus gyttja (assumed)	marine clay (assumed)	negative	n/a	n/a	n/a	nd	nd	nd	nd	0	0.1	0	0	0	0	0.5	0	0.1	0	1	0	nd	1981	9	MTL	midpoint	1.12694	1.12694	-1.10935
624	T-3244	Kjemperud 1981 a,b, 1982, 1986	2	Trondheimsfjord; klartjernet	63.88	9.87	1	3830	90	0	3830	90	4264	516	426	fine detritus gyttja (assumed)	1	corr	not reported; assumed bulk sediment	fine detritus gyttja (assumed)	marine clay (assumed)	negative	n/a	n/a	n/a	nd	nd	nd	nd	0	0.1	0	0	0	0	0.65992	0	0.1	0	1	0	nd	1981	16	MTL	midpoint	1.20644	1.20644	-1.10558
625	T-3151	Kjemperud 1981 a,b, 1982, 1986	2	Trondheimsfjord; eidemstjernet	63.35	9.87	1	4710	50	0	4710	50	5459.83	195.167	408.833	fine detritus gyttja (assumed)	1	corr	not reported; assumed bulk sediment	fine detritus gyttja (assumed)	marine clay (assumed)	negative	n/a	n/a	n/a	nd	nd	nd	nd	0	0.1	0	0	0	0	0.72	0	0.1	0	1	0	nd	1981	22	MTL	midpoint	1.24032	1.24032	-1.10558
626	T-3430	Kjemperud 1981 a,b, 1982, 1986	2	Trondheimsfjord; brekkvatnet	63.77	9.83	1	5280	70	0	5280	70	6056.67	242.333	306.667	fine detritus gyttja (assumed)	1	corr	not reported; assumed bulk sediment	fine detritus gyttja (assumed)	marine clay (assumed)	negative	n/a	n/a	n/a	nd	0.05	nd	nd	0	0.1	0	0	0	0	0.759866	0	0.1	0	1	0	nd	1981	26	MTL	midpoint	1.26388	1.26388	-1.09758
627	T-3245	Kjemperud 1981 a,b, 1982, 1986	2	Trondheimsfjord; store kruktjernet	63.77	9.83	1	6040	110	0	6040	110	6929.5	329.5	422.5	fine detritus gyttja (assumed)	1	corr	not reported; assumed bulk sediment	fine detritus gyttja (assumed)	marine clay (assumed)	negative	n/a	n/a	n/a	nd	0.05	nd	nd	0	0.1	0	0	0	0	0.799866	0	0.1	0	1	0	nd	1981	30	MTL	midpoint	1.28833	1.28833	-1.09758
628	T-3146	Kjemperud 1981 a,b, 1982, 1986	2	Trondheimsfjord; lille kruktmernet	63.77	9.83	1	8710	90	0	8710	90	9767.75	399.25	275.75	fine detritus gyttja (assumed)	1	corr	not reported; assumed bulk sediment	fine detritus gyttja (assumed)	marine clay (assumed)	negative	n/a	n/a	n/a	nd	0.05	nd	nd	0	0.1	0	0	0	0	0.929866	0	0.1	0	1	0	nd	1981	43	MTL	midpoint	1.37283	1.37283	-1.08518
629	T-3147	Kjemperud 1981 a,b, 1982, 1986	2	Trondheimsfjord; Saetertjernet I	63.83	9.88	1	9070	130	0	9070	130	10195.4	458.625	511.375	fine detritus gyttja (assumed)	1	corr	not reported; assumed bulk sediment	fine detritus gyttja (assumed)	marine clay (assumed)	negative	n/a	n/a	n/a	nd	0.05	nd	nd	0	0.1	0	0	0	0	0.759945	0	0.1	0	1	0	nd	1981	52	MTL	midpoint	1.26393	1.26393	-1.08518
630	T-3243	Kjemperud 1981 a,b, 1982, 1986	2	Trondheimsfjord; Middagsskardtjernet	63.85	9.93	1	9250	160	0	9250	160	10410	690	500	fine detritus gyttja (assumed)	1	corr	not reported; assumed bulk sediment	fine detritus gyttja (assumed)	marine clay (assumed)	negative	n/a	n/a	n/a	nd	0.05	nd	nd	0	0.1	0	0	0	0	0.819955	0	0.1	0	1	0	nd	1981	64	MTL	midpoint	1.30089	1.30089	-1.07176
631	T-3145	Kjemperud 1981 a,b, 1982, 1986	2	Trondheimsfjord; almtjernet	63.78	10.08	1	9170	120	0	9170	120	10405.5	586.5	600.5	fine detritus gyttja (assumed)	1	corr	not reported; assumed bulk sediment	fine detritus gyttja (assumed)	marine clay (assumed)	negative	n/a	n/a	n/a	nd	0.05	nd	nd	0	0.1	0	0	0	0	0.859949	0	0.1	0	1	0	nd	1981	72	MTL	midpoint	1.32647	1.32647	-1.20763
632	T-3148	Kjemperud 1981 a,b, 1982, 1986	2	Trondheimsfjord; dragamyra	63.8	9.85	1	9880	100	0	9880	100	11451.7	376.333	657.667	fine detritus gyttja (assumed)	1	corr	not reported; assumed bulk sediment	fine detritus gyttja (assumed)	marine clay (assumed)	negative	n/a	n/a	n/a	nd	0.05	nd	nd	0	0.1	0	0	0	0	0.929938	0	0.1	0	1	0	nd	1981	86	MTL	midpoint	1.37287	1.37287	-1.21729
633	T-3429	Kjemperud 1981 a,b, 1982, 1986	2	Trondheimsfjord; dragavatnet	63.8	9.85	1	9500	110	0	9500	110	10845	361	461	fine detritus gyttja (assumed)	1	corr	not reported; assumed bulk sediment	fine detritus gyttja (assumed)	marine clay (assumed)	negative	n/a	n/a	n/a	nd	0.05	nd	nd	0	0.1	0	0	0	0	0.959938	0	0.1	0	1	0	nd	1981	92	MTL	midpoint	1.39337	1.39337	-1.21729
634	T-3242	Kjemperud 1981 a,b, 1982, 1986	2	Trondheimsfjord; saetertjernet II	63.8	9.88	1	9710	150	0	9710	150	10977.9	722.125	454.875	fine detritus gyttja (assumed)	1	corr	not reported; assumed bulk sediment	fine detritus gyttja (assumed)	marine clay (assumed)	negative	n/a	n/a	n/a	nd	0.05	nd	nd	0	0.1	0	0	0	0	1.01994	0	0.1	0	1	0	nd	1981	104	MTL	midpoint	1.43536	1.43536	-1.21603
635	T-3246	Kjemperud 1981 a,b, 1982, 1986	2	Trondheimsfjord; ovre saetertjernet	63.8	9.88	1	10330	120	0	10330	120	12259.1	421.875	851.125	fine detritus gyttja (assumed)	1	corr	not reported; assumed bulk sediment	fine detritus gyttja (assumed)	marine clay (assumed)	negative	n/a	n/a	n/a	nd	0.05	nd	nd	0	0.1	0	0	0	0	1.07494	0	0.1	0	1	0	nd	1981	115	MTL	midpoint	1.47495	1.47495	-1.21556
636	T-3144	Kjemperud 1981 a,b, 1982, 1986	2	Trondheimsfjord; katt-tjernet	63.78	9.85	1	11380	220	0	11380	220	13207.5	545.5	383.5	fine detritus gyttja (assumed)	1	corr	not reported; assumed bulk sediment	fine detritus gyttja (assumed)	marine clay (assumed)	negative	n/a	n/a	n/a	nd	0.05	nd	nd	0	0.1	0	0	0	0	1.08993	0	0.1	0	1	0	nd	1981	118	MTL	midpoint	1.48592	1.48592	-1.21556
637	T-4282	Kjemperud 1981 a,b, 1982, 1986	2	Trondheimsfjord; duehaugtjernet	63.78	9.85	1	11920	290	0	11920	290	13674.2	1220.75	493.25	fine detritus gyttja (assumed)	1	corr	not reported; assumed bulk sediment	fine detritus gyttja (assumed)	marine clay (assumed)	negative	n/a	n/a	n/a	nd	0.05	nd	nd	0	0.1	0	0	0	0	1.10493	0	0.1	0	1	0	nd	1981	121	MTL	midpoint	1.49696	1.49696	-1.13318
638	T-3428	Kjemperud 1981 a,b, 1982, 1986	2	Trondheimsfjord; lille gjolgavatnet	63.78	10	1	11800	210	0	11800	210	13637.5	612.5	471.5	fine detritus gyttja (assumed)	1	corr	not reported; assumed bulk sediment	fine detritus gyttja (assumed)	marine clay (assumed)	negative	n/a	n/a	n/a	nd	0.05	nd	nd	0	0.1	0	0	0	0	1.17993	0	0.1	0	1	0	nd	1981	136	MTL	midpoint	1.55314	1.55314	-1.13318
639	T-4276	Kjemperud 1981 a,b, 1982, 1986	2	Trondheimsfjord; makrelltjernet	63.57	8.98	1	5160	90	0	5160	90	5938	328	334	fine detritus gyttja (assumed)	1	corr	not reported; assumed bulk sediment	fine detritus gyttja (assumed)	marine clay (assumed)	negative	n/a	n/a	n/a	nd	0.05	nd	nd	0	0.1	0	0	0	0	0.680205	0	0.1	0	1	0	nd	1981	18	MTL	midpoint	1.21765	1.21765	-1.12943
640	T-4274	Kjemperud 1981 a,b, 1982, 1986	2	Trondheimsfjord; stiksdalsjernet	63.55	9	1	9750	120	0	9750	120	10981.6	711.375	376.625	fine detritus gyttja (assumed)	1	corr	not reported; assumed bulk sediment	fine detritus gyttja (assumed)	marine clay (assumed)	negative	n/a	n/a	n/a	nd	0.05	nd	nd	0	0.1	0	0	0	0	0.91	0	0.1	0	1	0	nd	1981	41	MTL	midpoint	1.35945	1.35945	-1.10972
641	T-4275	Kjemperud 1981 a,b, 1982, 1986	2	Trondheimsfjord; ostjernet	63.55	9	1	9720	90	0	9720	90	10965.7	636.333	365.667	fine detritus gyttja (assumed)	1	corr	not reported; assumed bulk sediment	fine detritus gyttja (assumed)	marine clay (assumed)	negative	n/a	n/a	n/a	nd	0.05	nd	nd	0	0.1	0	0	0	0	0.805122	0	0.1	0	1	0	nd	1981	61	MTL	midpoint	1.2916	1.2916	-1.07516
642	T-4277	Kjemperud 1981 a,b, 1982, 1986	2	Trondheimsfjord; engliatjernet	63.53	8.98	1	9880	180	0	9880	180	11531	564	926	fine detritus gyttja (assumed)	1	corr	not reported; assumed bulk sediment	fine detritus gyttja (assumed)	marine clay (assumed)	negative	n/a	n/a	n/a	nd	0.05	nd	nd	0	0.1	0	0	0	0	0.877621	0	0.1	0	1	0	nd	1981	75.5	MTL	midpoint	1.33799	1.33799	-0.581545
643	T-4317	Kjemperud 1981 a,b, 1982, 1986	2	Trondheimsfjord; nedre Heilfjelltj I	63.53	8.97	1	12040	280	0	12040	280	13892.5	1120.5	565.5	fine detritus gyttja (assumed)	1	corr	not reported; assumed bulk sediment	fine detritus gyttja (assumed)	marine clay (assumed)	negative	n/a	n/a	n/a	nd	0.05	nd	nd	0	0.1	0	0	0	0	0.980121	0	0.1	0	1	0	nd	1981	96	MTL	midpoint	1.40735	1.40735	-0.579508
644	T-4323	Kjemperud 1981 a,b, 1982, 1986	2	Trondheimsfjord; Nedre Heilfjelltj II	63.53	8.97	1	12600	170	0	12600	170	14821.2	704.75	686.25	fine detritus gyttja (assumed)	1	corr	not reported; assumed bulk sediment	fine detritus gyttja (assumed)	marine clay (assumed)	negative	n/a	n/a	n/a	nd	0.05	nd	nd	0	0.1	0	0	0	0	0.980121	0	0.1	0	1	0	nd	1981	96	MTL	midpoint	1.40735	1.40735	-0.581749
645	T-3159	Kjemperud 1981 a,b, 1982, 1986	2	Trondheimsfjord; Litjklingertjernet I	63.77	8.8	1	4880	150	0	4880	150	5722.25	382.75	669.25	fine detritus gyttja (assumed)	1	corr	not reported; assumed bulk sediment	fine detritus gyttja (assumed)	marine clay (assumed)	negative	n/a	n/a	n/a	nd	0.05	nd	nd	0	0.1	0	0	0	0	0.64495	0	0.1	0	1	0	nd	1981	14.5	MTL	midpoint	1.19832	1.19832	-0.562267
646	T-4293	Kjemperud 1981 a,b, 1982, 1986	2	Trondheimsfjord; Litjklingertjernet II	63.77	8.8	1	5380	80	0	5380	80	6114.62	322.375	212.625	fine detritus gyttja (assumed)	1	corr	not reported; assumed bulk sediment	fine detritus gyttja (assumed)	marine clay (assumed)	negative	n/a	n/a	n/a	nd	0.05	nd	nd	0	0.1	0	0	0	0	0.64495	0	0.1	0	1	0	nd	1981	14.5	MTL	midpoint	1.19832	1.19832	-0.564966
647	T-2843	Kjemperud 1981 a,b, 1982, 1986	2	Trondheimsfjord; Krokvatnet	63.7	8.75	1	9200	140	0	9200	140	10373.5	695.5	551.5	fine detritus gyttja (assumed)	1	corr	not reported; assumed bulk sediment	fine detritus gyttja (assumed)	marine clay (assumed)	negative	n/a	n/a	n/a	nd	0.05	nd	nd	0	0.1	0	0	0	0	0.76993	0	0.1	0	1	0	nd	1981	27	MTL	midpoint	1.26996	1.26996	-0.564966
648	T-3149	Kjemperud 1981 a,b, 1982, 1986	2	Trondheimsfjord; Grasvatnet	63.7	8.7	1	10360	100	0	10360	100	12186.7	495.333	533.667	fine detritus gyttja (assumed)	1	corr	not reported; assumed bulk sediment	fine detritus gyttja (assumed)	marine clay (assumed)	negative	n/a	n/a	n/a	nd	0.05	nd	nd	0	0.1	0	0	0	0	0.944964	0	0.1	0	1	0	nd	1981	44.5	MTL	midpoint	1.3831	1.3831	-0.563825
649	T-3444	Kjemperud 1981 a,b, 1982, 1986	2	Trondheimsfjord; Rossvatnet	63.7	8.62	1	9670	140	0	9670	140	10972.6	634.375	465.625	fine detritus gyttja (assumed)	1	corr	not reported; assumed bulk sediment	fine detritus gyttja (assumed)	marine clay (assumed)	negative	n/a	n/a	n/a	nd	0.05	nd	nd	0	0.1	0	0	0	0	0.890017	0	0.1	0	1	0	nd	1981	39	MTL	midpoint	1.34615	1.34615	-0.56448
650	T-4280	Kjemperud 1981 a,b, 1982, 1986	2	Trondheimsfjord; Albergmyra	63.93	11.42	1	8480	160	0	8480	160	9502.75	616.25	497.75	fine detritus gyttja (assumed)	1	corr	not reported; assumed bulk sediment	fine detritus gyttja (assumed)	marine clay (assumed)	negative	n/a	n/a	n/a	nd	0.05	nd	nd	0	0.1	0	0	0	0	0.950183	0	0.1	0	1	0	nd	1981	90	MTL	midpoint	1.38667	1.38667	-0.565194
651	T-4279	Kjemperud 1981 a,b, 1982, 1986	2	Trondheimsfjord; Venastjernet	63.95	11.28	1	8500	130	0	8500	130	9444.5	665.5	419.5	fine detritus gyttja (assumed)	1	corr	not reported; assumed bulk sediment	fine detritus gyttja (assumed)	marine clay (assumed)	negative	n/a	n/a	n/a	nd	0.05	nd	nd	0	0.1	0	0	0	0	0.915178	0	0.1	0	1	0	nd	1981	83	MTL	midpoint	1.36292	1.36292	-0.564966
652	T-4278	Kjemperud 1981 a,b, 1982, 1986	2	Trondheimsfjord; Koltjernet	63.82	11.78	1	10700	220	0	10700	220	12538.5	564.5	704.5	fine detritus gyttja (assumed)	1	corr	not reported; assumed bulk sediment	fine detritus gyttja (assumed)	marine clay (assumed)	negative	n/a	n/a	n/a	nd	0.05	nd	nd	0	0.1	0	0	0	0	1.345	0	0.1	0	1	0	nd	1981	169	MTL	midpoint	1.68197	1.68197	-0.565194
653	T-2625	Kjemperud 1981 a,b, 1982, 1986	2	Trondheimsfjord; Lianvatnet	63.6	10.77	1	5880	130	0	5880	130	6754.25	401.75	438.25	fine detritus gyttja	1	corr	not reported; assumed bulk sediment	fine detritus gyttja	marine clay	negative	n/a	n/a	n/a	nd	0.05	nd	nd	0	0.1	0	0	0	0	0.925133	0	0.1	0	1	0	nd	1981	42.5	MTL	midpoint	1.36962	1.36962	-0.565164
654	T-2482	Kjemperud 1981 a,b, 1982, 1986	2	Trondheimsfjord; Skardtjernet I	63.65	10.88	1	8300	190	0	8300	190	9293.5	404.5	692.5	clay gyttja	1	corr	not reported; assumed bulk sediment	lacustrine gyttja	marine sediment	negative	n/a	n/a	n/a	nd	0.05	nd	nd	0	0.1	0	0	0	0	0.860112	0	0.1	0	1	0	nd	1981	72	MTL	midpoint	1.32657	1.32657	-1.61062
655	T-2483	Kjemperud 1981 a,b, 1982, 1986	2	Trondheimsfjord; Skardtjernet II	63.65	10.88	1	8180	190	0	8180	190	9268.5	270.5	717.5	lacustrine gyttja	1	corr	not reported; assumed bulk sediment	lacustrine gyttja	marine sediment	negative	n/a	n/a	n/a	nd	0.05	nd	nd	0	0.1	0	0	0	0	0.860112	0	0.1	0	1	0	nd	1981	72	MTL	midpoint	1.32657	1.32657	-1.28872
656	T-2568	Kjemperud 1981 a,b, 1982, 1986	2	Trondheimsfjord; Remmavatnet	63.75	10.87	1	9530	150	0	9530	150	10894.2	351.75	596.25	fine detritus gyttja	1	corr	not reported; assumed bulk sediment	fine detritus gyttja	marine clay	negative	n/a	n/a	n/a	nd	0.05	nd	nd	0	0.1	0	0	0	0	1.04262	0	0.1	0	1	0	nd	1981	108.5	MTL	midpoint	1.45157	1.45157	-1.28872
657	T-2570	Kjemperud 1981 a,b, 1982, 1986	2	Trondheimsfjord; Hovdalsvatnet	63.63	10.87	1	9560	160	0	9560	160	10910	402	620	fine detritus gyttja	1	corr	not reported; assumed bulk sediment	fine detritus gyttja	marine clay	negative	n/a	n/a	n/a	nd	0.05	nd	nd	0	0.1	0	0	0	0	1.0926	0	0.1	0	1	0	nd	1981	118.5	MTL	midpoint	1.48788	1.48788	-1.28872
658	T-2569	Kjemperud 1981 a,b, 1982, 1986	2	Trondheimsfjord; Gronnsjoen	63.68	10.97	1	9730	200	0	9730	200	11020	853	587	fine detritus gyttja	1	corr	not reported; assumed bulk sediment	fine detritus gyttja	marine clay	negative	n/a	n/a	n/a	nd	0.05	nd	nd	0	0.1	0	0	0	0	1.21514	0	0.1	0	1	0	nd	1981	143	MTL	midpoint	1.58005	1.58005	-1.28872
659	T-2571	Kjemperud 1981 a,b, 1982, 1986	2	Trondheimsfjord; Storsvetjernet	63.63	10.9	1	10200	200	0	10200	200	11972.7	643.286	730.714	fine detritus gyttja	1	corr	not reported; assumed bulk sediment	fine detritus gyttja	marine clay	negative	n/a	n/a	n/a	nd	0.05	nd	nd	0	0.1	0	0	0	0	1.27261	0	0.1	0	1	0	nd	1981	154.5	MTL	midpoint	1.62467	1.62467	-1.28872
660	T-2484	Kjemperud 1981 a,b, 1982, 1986	2	Trondheimsfjord; Smatjernet	63.68	10.97	1	10330	270	0	10330	270	12010.5	739.5	770.5	fine detritus gyttja	1	corr	not reported; assumed bulk sediment	fine detritus gyttja	marine clay	negative	n/a	n/a	n/a	nd	0.05	nd	nd	0	0.1	0	0	0	0	1.35014	0	0.1	0	1	0	nd	1981	170	MTL	midpoint	1.68608	1.68608	-1.28872
661	T-2624	Kjemperud 1981 a,b, 1982, 1986	2	Trondheimsfjord; Skalitjernet	63.67	10.95	1	10480	200	0	10480	200	12326.6	503.357	920.643	fine detritus gyttja	1	corr	not reported; assumed bulk sediment	fine detritus gyttja	marine clay	negative	n/a	n/a	n/a	nd	0.05	nd	nd	0	0.1	0	0	0	0	1.35013	0	0.1	0	1	0	nd	1981	170	MTL	midpoint	1.68608	1.68608	-1.28872
662	T-5428	Engelstad 1986 (as in Moller 1987)	2	Finnmark; Karlebotn	70.0648	28.9533	2	7710	480		7710	480	8794.5	870.5	1274.5	cultural layer	1		Charcoal	nd	nd	nd	nd	nd	n/a	nd	nd	nd	nd	0	0	0	0	0	0	0.907154	0	0.1	0	1	0	nd	1987	42.5	MTL	midpoint	1.35386	1.35386	-1.28872
663	T-2485	Engelstad 1986 (as in Moller 1987)	2	Finnmark; Iversfjord	70.8084	28.107	40	4120	50		4120	50	4669.62	156.375	244.625	cultural layer	2		shell	nd	nd	nd	nd	nd	n/a	nd	nd	nd	nd	0	0	0	0	0	0	0.5	0	0.1	0	1	0	nd	1987	11	MTL	midpoint	1.1225	1.1225	-1.28872
664	T-2347	Engelstad 1986 (as in Moller 1987)	2	Finnmark; Iversfjord	70.8084	28.107	41	3910	70		3910	70	3487.5	311.5	253.5	cultural layer	2		shell	nd	nd	nd	nd	nd	n/a	nd	nd	nd	nd	0	0	0	0	0	0	0.5	0	0.1	0	1	0	nd	1987	11	MTL	midpoint	1.1225	1.1225	-1.28872
665	T-2881	Engelstad 1986 (as in Moller 1987)	2	Finnmark; Iversfjord	70.8084	28.107	42	4240	100		4240	100	3922	439	433	cultural layer	1		birch and charcoal	nd	nd	nd	nd	nd	n/a	nd	nd	nd	nd	0	0	0	0	0	0	0.5	0	0.1	0	1	0	nd	1987	11	MTL	midpoint	1.1225	1.1225	-1.28872
666	T-2348	Engelstad 1986 (as in Moller 1987)	2	Finnmark; Iversfjord	70.8084	28.107	43	3490	100		3490	100	3662.5	484.5	274.5	cultural layer	1		birch and charcoal	nd	nd	nd	nd	nd	n/a	nd	nd	nd	nd	0	0	0	0	0	0	0.5	0	0.1	0	1	0	nd	1987	10	MTL	midpoint	1.1225	1.1225	-1.28872
667	T-2486	Engelstad 1986 (as in Moller 1987)	2	Finnmark; Iversfjord	70.8084	28.107	44	3490	130		3490	130	3788.5	445.5	429.5	cultural layer	1		birch and charcoal	nd	nd	nd	nd	nd	n/a	nd	nd	nd	nd	0	0	0	0	0	0	0.5	0	0.1	0	1	0	nd	1987	10	MTL	midpoint	1.1225	1.1225	-1.28872
668	T-2771	Engelstad 1986 (as in Moller 1987)	2	Finnmark; Iversfjord	70.8084	28.107	45	3640	120		3640	120	3902.62	507.375	406.625	cultural layer	1		birch and charcoal	nd	nd	nd	nd	nd	n/a	nd	nd	nd	nd	0	0	0	0	0	0	0.5	0	0.1	0	1	0	nd	1987	10	MTL	midpoint	1.1225	1.1225	-1.28872
669	T-2048	Engelstad 1986 (as in Moller 1987)	2	Finnmark; Iversfjord	70.8084	28.107	46	3100	70		3100	70	3277.5	289.5	392.5	cultural layer	1		birch and charcoal	nd	nd	nd	nd	nd	n/a	nd	nd	nd	nd	0	0	0	0	0	0	0.5	0	0.1	0	1	0	nd	1987	10	MTL	midpoint	1.1225	1.1225	-1.00783
670	T-2772	Engelstad 1986 (as in Moller 1987)	2	Finnmark; Iversfjord	70.8084	28.107	47	3730	90		3730	90	4122.5	384.5	476.5	cultural layer	1		birch and charcoal	nd	nd	nd	nd	nd	n/a	nd	nd	nd	nd	0	0	0	0	0	0	0.5	0	0.1	0	1	0	nd	1987	10	MTL	midpoint	1.1225	1.1225	-1.00783
671	T-2049	Engelstad 1986 (as in Moller 1987)	2	Finnmark; Iversfjord	70.8084	28.107	48	2600	70		2600	70	2634	320	289	cultural layer	1		birch and charcoal	nd	nd	nd	nd	nd	n/a	nd	nd	nd	nd	0	0	0	0	0	0	0.5	0	0.1	0	1	0	nd	1987	10	MTL	midpoint	1.1225	1.1225	-1.00783
672	T-2050	Engelstad 1986 (as in Moller 1987)	2	Finnmark; Iversfjord	70.8084	28.107	49	2490	100		2490	100	2550	314	402	cultural layer	1		birch and charcoal	nd	nd	nd	nd	nd	n/a	nd	nd	nd	nd	0	0	0	0	0	0	0.5	0	0.1	0	1	0	nd	1987	10	MTL	midpoint	1.1225	1.1225	-1.00783
673	T-2349	Engelstad 1986 (as in Moller 1987)	2	Finnmark; Iversfjord	70.8084	28.107	50	3560	100		3560	100	3884.25	351.75	429.25	cultural layer	1		birch and charcoal	nd	nd	nd	nd	nd	n/a	nd	nd	nd	nd	0	0	0	0	0	0	0.5	0	0.1	0	1	0	nd	1987	10	MTL	midpoint	1.1225	1.1225	-1.00783
674	T-2487	Engelstad 1986 (as in Moller 1987)	2	Finnmark; Iversfjord	70.8084	28.107	51	3590	70		3590	70	3829	407	336	cultural layer	1		birch and charcoal	nd	nd	nd	nd	nd	n/a	nd	nd	nd	nd	0	0	0	0	0	0	0.5	0	0.1	0	1	0	nd	1987	10	MTL	midpoint	1.1225	1.1225	-1.00783
675	T-2350	Engelstad 1986 (as in Moller 1987)	2	Finnmark; Iversfjord	70.8084	28.107	52	2800	100		2800	100	2926.5	416.5	431.5	cultural layer	1		birch and charcoal	nd	nd	nd	nd	nd	n/a	nd	nd	nd	nd	0	0	0	0	0	0	0.5	0	0.1	0	1	0	nd	1987	9	MTL	midpoint	1.1225	1.1225	-1.31655
676	T-2773	Engelstad 1986 (as in Moller 1987)	2	Finnmark; Iversfjord	70.8084	28.107	53	3410	80		3410	80	3651.5	414.5	374.5	cultural layer	1		birch and charcoal	nd	nd	nd	nd	nd	n/a	nd	nd	nd	nd	0	0	0	0	0	0	0.5	0	0.1	0	1	0	nd	1987	9	MTL	midpoint	1.1225	1.1225	-1.31655
677	T-5282	Moller 1986	2	Vesteralen	69.1764	16.0859	1	7400	120	0	7400	120	8159.25	358.75	280.25	peat	1	corr	sand and gyttja	peat	sand and peat	negative	1	2	1	nd	nd	nd	nd	0	0.1	0	0	0	0	0.5	0	0.1	0	1	0	nd	1981	3	MTL	midpoint	1.12694	1.12694	-0.416109
678	T-5284A	Moller 1986	2	Vesteralen	69.1764	16.0859	1	6720	160	0	6720	160	7539.25	385.75	223.25	peat	0	corr	alnus and pinus	sand and peat	sand and peat	negative	2.5	1.5	1	nd	nd	nd	nd	0	0.1	0	0	0	0	0.5	0	0.1	0	1	0	nd	1981	7.7	MTL	midpoint	1.12694	1.12694	-0.416109
679	T-5285A	Moller 1986	2	Vesteralen	69.1764	16.0859	1	6290	60	0	6290	60	7219.75	191.25	210.75	peat	0	corr	alnus and pinus	sand and peat	sand and peat	negative	2.5	1.5	1	nd	nd	nd	nd	0	0.1	0	0	0	0	0.5	0	0.1	0	1	0	nd	1981	7.8	MTL	midpoint	1.12694	1.12694	-1.13308
680	T-5286A	Moller 1986	2	Vesteralen	69.1764	16.0859	1	6140	50	0	6140	50	7060.83	102.167	169.833	peat	0	corr	alnus and pinus	sand and peat	sand and peat	negative	2	2	1	nd	nd	nd	nd	0	0.1	0	0	0	0	0.5	0	0.1	0	1	0	nd	1981	8.1	MTL	midpoint	1.12694	1.12694	-1.13308
681	T-5287A	Moller 1986	2	Vesteralen	69.1764	16.0859	1	6090	100	0	6090	100	6938.62	308.375	257.625	peat	0	corr	alnus and pinus	sand and peat	sand and peat	negative	1.5	2.5	1	nd	nd	nd	nd	0	0.1	0	0	0	0	0.5	0	0.1	0	1	0	nd	1981	8.5	MTL	midpoint	1.12694	1.12694	-1.01698
682	T-5288	Moller 1986	2	Vesteralen	69.1764	16.0859	1	3480	80	0	3480	80	3734.83	354.167	283.833	peat	1	corr	peat	beach sediments	laminated peat	negative	1	3	1	nd	nd	nd	nd	0	0.1	0	0	0	0	0.5	0	0.1	0	1	0	nd	1981	9.1	MTL	midpoint	1.12694	1.12694	-1.01698
683	T-5399	Vorren and Moe 1986	2	Lofoten	68.0994	13.65	1	8010	110	0	8010	110	8757	639	292	peat	1	corr	gyttja	redeposited peat and shore sand	herb-carex peat with phragmites	positive	0.7	nd	nd	russian corer	nd	measured	nd	0	0.1	0	0	1.4775	0	0.5	0	0.1	0.5	1	0	nd	1981	-0.8	MTL	midpoint	1.92432	1.92432	-0.43487
684	T-5400	Vorren and Moe 1986	2	Lofoten	68.0994	13.65	1	9060	140	0	9060	140	10156.9	497.1	547.9	peat	1	corr	gyttja	herb-carex peat with phragmites	carex-phragmites peat	positive	0.7	nd	nd	russian corer	nd	measured	nd	0	0.1	0	0	1.4775	0	0.5	0	0.1	0.5	1	0	nd	1981	-1.35	MTL	midpoint	1.92432	1.92432	-1.24064
685	T-7360A	Anundsen 1985 (also in Flatekval 1991 and Helle et al 2007)	2	Rogaland; Yrkje; Tau-36	59.3852	5.64	1	11180	150	0	11180	150	13003.5	402.5	249.5	Gyttja-rich lake sediments	1	corr	bulk gyttja	lacustrine gyttja	lacustrine gyttja	positive	n/a	n/a	n/a	nd	nd	nd	nd	0	0.1	0	0	0	0	0.856259	0	0.1	0	1	0	nd	1981	36	MTL	midpoint	1.32408	1.32408	-1.24064
686	T-7361A	Anundsen 1985 (as in Helle et al. 2007)	2	Rogaland; Yrkje; Tau-36	59.3852	5.64	1	12440	260	0	12440	260	14625	879	829	Gyttja-rich lake sediments	1	corr	bulk gyttja	lacustrine gyttja	lacustrine gyttja	positive	n/a	n/a	n/a	nd	nd	nd	nd	0	0.1	0	0	0	0	0.856259	0	0.1	0	1	0	nd	1981	36	MTL	midpoint	1.32408	1.32408	-1.24064
687	T-4645A	Johannsen et al 1985 ( as in Svendsen and Mangerud 1987 )	2	sor trondelag; hakkasvatnet	62.8605	8.21	1	11840	130	0	11840	130	13612.5	452.5	254.5	silty clay	1	corr	not reported; assumed bulk sediment	gyttja	sand and silt	negative	n/a	n/a	n/a	nd	nd	nd	nd	0	0.1	0	0	0	0	1.08241	0	0.1	0	1	0	nd	1981	117.5	MTL	midpoint	1.48041	1.48041	-1.24064
688	T-5696	Otteson 1985 and Follestad 1985 ( as in Svendsen and Mangerud 1987 )	2	sor trondelag; marine limit	62.8605	8.21	1	12210	160	0	12210	160	14276.5	712.5	660.5	marine	1	corr	not reported; assumed bulk sediment	nd	nd	negative	n/a	n/a	n/a	nd	nd	nd	nd	0	0.1	0	0	0	0	1.11991	0	0.1	0	1	0	nd	1981	125	MTL	midpoint	1.50804	1.50804	-1.24064
689	T-4466A	Johannsen et al 1985 ( as in Svendsen and Mangerud 1987 )	2	Sor trondelag; gjengsetvatnet	63.0424	8.01	1	10030	150	0	10030	150	11460	1002	346	silty clay gyttja	1	corr	not reported; assumed bulk sediment	light brown gyttja	sandy clayey gyttja	negative	n/a	n/a	n/a	nd	nd	nd	nd	0	0.1	0	0	0	0	0.84514	0	0.1	0	1	0	nd	1981	69	MTL	midpoint	1.31691	1.31691	-1.24064
690	T-4466A	Johannsen et al 1985 ( as in Svendsen and Mangerud 1987 )	2	Sor trondelag; gjengsetvatnet	63.0424	8.01	1	10320	200	0	10320	200	12185.4	520.6	838.4	silty clay gyttja	1	corr	not reported; assumed bulk sediment	light brown gyttja	sand and silt	negative	n/a	n/a	n/a	nd	nd	nd	nd	0	0.1	0	0	0	0	0.845	0	0.1	0	1	0	nd	1981	69	MTL	midpoint	1.31682	1.31682	-1.24064
691	T-5481A	Braaten and Hermansen 1985 (as in Helle et al. 2007)	2	Yrkje;	59.4032	5.66	1	10110	210	0	10110	210	11514.2	1102.75	399.25	Gyttja-rich lake sediments	1	corr	bulk gyttja	lacustrine gyttja	marine gyttja	negative	n/a	n/a	n/a	nd	nd	nd	nd	0	0.1	0	0	0	0	0.917239	0	0.1	0	1	0	nd	1981	41.7	MTL	midpoint	1.36431	1.36431	-1.30162
692	T-5131	Andreassen 1985 (as in Moller 1987)	2	Finnmark; hellefjord	70.7164	23.2924	54	4150	160		4150	160	4707.25	557.75	557.25	cultural layer	2		fishbone	nd	nd	nd	nd	nd	n/a	nd	nd	nd	nd	0	0	0	0	0	0	0.600981	0	0.1	0	1	0	nd	1987	11.5	MTL	midpoint	1.17097	1.17097	-1.30162
693	T-4339	Andreassen 1985 (as in Moller 1987)	2	Finnmark; hellefjord	70.7164	23.2924	55	4950	200		4950	200	4847	595	589	cultural layer	1		charcoal	nd	nd	nd	nd	nd	n/a	nd	nd	nd	nd	0	0	0	0	0	0	0.600981	0	0.1	0	1	0	nd	1987	11.5	MTL	midpoint	1.17097	1.17097	-1.30162
694	T-4336	Andreassen 1985 (as in Moller 1987)	2	Finnmark; hellefjord	70.7164	23.2924	56	4270	90		4270	90	4793.5	488.5	371.5	cultural layer	1		charcoal	nd	nd	nd	nd	nd	n/a	nd	nd	nd	nd	0	0	0	0	0	0	0.610981	0	0.1	0	1	0	nd	1987	12.5	MTL	midpoint	1.17614	1.17614	-0.655752
695	T-4338	Andreassen 1985 (as in Moller 1987)	2	Finnmark; hellefjord	70.7164	23.2924	57	4590	180		4590	180	5318.5	414.5	695.5	cultural layer	1		charcoal	nd	nd	nd	nd	nd	n/a	nd	nd	nd	nd	0	0	0	0	0	0	0.600981	0	0.1	0	1	0	nd	1987	11.5	MTL	midpoint	1.17097	1.17097	-0.179411
696	T-4848	Andreassen 1985 (as in Moller 1987)	2	Finnmark; hellefjord	70.7164	23.2924	58	3190	90		3190	90	3337	476	369	cultural layer	1		charcoal	nd	nd	nd	nd	nd	n/a	nd	nd	nd	nd	0	0	0	0	0	0	0.5	0	0.1	0	1	0	nd	1987	10	MTL	midpoint	1.1225	1.1225	-0.179411
697	T-4847	Andreassen 1985 (as in Moller 1987)	2	Finnmark; hellefjord	70.7164	23.2924	59	4160	150		4160	150	4567.75	712.25	465.75	cultural layer	1		charcoal	nd	nd	nd	nd	nd	n/a	nd	nd	nd	nd	0	0	0	0	0	0	0.5	0	0.1	0	1	0	nd	1987	9.5	MTL	midpoint	1.1225	1.1225	-0.179411
698	T-4114	Andreassen 1985 (as in Moller 1987)	2	Finnmark; hellefjord	70.7164	23.2924	60	4110	210		4110	210	4624.5	667.5	691.5	cultural layer	1		charcoal	nd	nd	nd	nd	nd	n/a	nd	nd	nd	nd	0	0	0	0	0	0	0.625981	0	0.1	0	1	0	nd	1987	14	MTL	midpoint	1.184	1.184	-0.581676
699	T-4113	Andreassen 1985 (as in Moller 1987)	2	Finnmark; hellefjord	70.7164	23.2924	61	7550	130		7550	130	8304.5	411.5	339.5	cultural layer	1		charcoal	nd	nd	nd	nd	nd	n/a	nd	nd	nd	nd	0	0	0	0	0	0	0.610981	0	0.1	0	1	0	nd	1987	12.5	MTL	midpoint	1.17614	1.17614	-0.579285
700	T-4577	Andreassen 1985 (as in Moller 1987)	2	Finnmark; Skarvfjordhamn	70.7608	23.1122	62	3560	70		3560	70	3883.25	339.75	413.25	cultural layer	1		charcoal	nd	nd	nd	nd	nd	n/a	nd	nd	nd	nd	0	0	0	0	0	0	0.5	0	0.1	0	1	0	nd	1987	9	MTL	midpoint	1.1225	1.1225	-0.579285
701	T-4575	Andreassen 1985 (as in Moller 1987)	2	Finnmark; Skarvfjordhamn	70.7608	23.1122	63	2830	40		2830	40	2863.75	457.25	135.75	cultural layer	1		charcoal	nd	nd	nd	nd	nd	n/a	nd	nd	nd	nd	0	0	0	0	0	0	0.5	0	0.1	0	1	0	nd	1987	8.5	MTL	midpoint	1.1225	1.1225	-0.529708
702	T-4576	Andreassen 1985 (as in Moller 1987)	2	Finnmark; Skarvfjordhamn	70.7608	23.1122	64	3840	60		3840	60	4264	305	421	cultural layer	1		charcoal	nd	nd	nd	nd	nd	n/a	nd	nd	nd	nd	0	0	0	0	0	0	0.5	0	0.1	0	1	0	nd	1987	10.5	MTL	midpoint	1.1225	1.1225	-0.581749
703	T-3257	Nydal 1985	2	Trondheimsfjord; eidemstjernet	63.35	9.87	1	5000	70	440	5000	70	5719.5	175.5	118.5	marine sediment	2	corr	ostrea edulis	lacustrine gyttja	marine sediment	negative	n/a	n/a	n/a	nd	nd	nd	nd	0	0.1	0	0	0	0	0.719842	0	0.1	0	1	0	nd	1981	22	MTL	midpoint	1.24023	1.24023	-0.579236
704	T-1839	Nydal 1985	2	Akershus; kolbjornviken skogen	59.3167	11.6	1	10110	190	0	10110	190	11008.5	600.5	546.5	nd	3	corr	balanus sp and mya truncata	nd	nd	negative	1.25	n/a	n/a	nd	nd	nd	nd	0	0.1	0	0	0	0	1.4	0	0.1	0	1	0	nd	1981	180	MTL	midpoint	1.72627	1.72627	-0.57806
705	T-1841	Nydal 1985	2	Akershus; kolbjornviken skogen	59.3167	11.6	1	10050	190	440	10050	190	10707.5	526.5	536.5	nd	2	corr	mytilus edulis	nd	nd	negative	1.5	n/a	n/a	nd	nd	nd	nd	0	0.1	0	0	0	0	1.08	0	0.1	0	1	0	nd	1981	116	MTL	midpoint	1.47865	1.47865	-0.58163
706	T-1840	Nydal 1985	2	Akershus; kilebu	59.3167	11.6	1	9520	140	440	9520	140	10005.5	383.5	472.5	nd	2	corr	littorina sp	nd	nd	negative	1	n/a	n/a	nd	nd	nd	nd	0	0.1	0	0	0	0	1.21	0	0.1	0	1	0	nd	1981	142	MTL	midpoint	1.5761	1.5761	-0.420405
707	T-4258	Sveian and Olsen 1984	Norway	Verdalsora; Leinskammen	63.9415	11.4595	1	10710	460	440	10710	460	11638.5	1109.5	1275.5	laminated silt and clay	2	corr	hiatella arctica	beach gravel	marine sediment	negative	n/a	n/a	n/a	nd	nd	nd	nd	0	0.1	0	0	0	0	1.32436	0	0.1	0	1	0	nd	1981	168	MTL	midpoint	1.66551	1.66551	-0.141267
708	T-4259A	Sveian and Olsen 1984	Norway	Verdalsora; Herstad ovre	63.9011	11.2674	1	10000	130	0	10000	130	10892	415	528	peat	1	corr	turf	peat	peat	negative	n/a	n/a	n/a	nd	nd	nd	nd	0	0.1	0	0	0	0	1.52246	0	0.1	0	1	0	nd	1981	205	MTL	midpoint	1.82699	1.82699	-0.141267
709	T-4259B	Sveian and Olsen 1984	Norway	Verdalsora; Herstad ovre	63.9011	11.2674	1	10280	150	0	10280	150	12234.4	387.643	884.357	peat	1	corr	turf	peat	peat	negative	n/a	n/a	n/a	nd	nd	nd	nd	0	0.1	0	0	0	0	1.52246	0	0.1	0	1	0	nd	1981	205	MTL	midpoint	1.82699	1.82699	-0.225216
710	T-3999	Sveian and Olsen 1984	Norway	Verdalsora; Leiradalen	63.7949	11.6797	1	9990	130	440	9990	130	11419.8	514.25	221.75	beach gravel	2	corr	shell	beach facies	beach facies	negative	n/a	n/a	n/a	nd	nd	nd	nd	0	0.1	0	0	0	0	1.19691	0	0.1	0	1	0	nd	1981	142.5	MTL	midpoint	1.56608	1.56608	-0.577022
711	T-3998	Sveian and Olsen 1984	Norway	Verdalsora; Tromsdalen	63.7441	11.6981	1	9930	130	440	9930	130	10785.5	379.5	394.5	beach gravel	2	corr	shell	beach facies	beach facies	negative	n/a	n/a	n/a	nd	nd	nd	nd	0	0.1	0	0	0	0	1.45996	0	0.1	0	1	0	nd	1981	192.5	MTL	midpoint	1.77524	1.77524	-0.580518
712	T-4257	Sveian and Olsen 1984	Norway	Verdalsora; Granavatn	63.9069	11.2657	1	9550	130	440	9550	130	10265.5	381.5	404.5	sandy silt and clay	2	corr	mya truncata	beach facies	beach facies	negative	0.5	n/a	n/a	nd	nd	nd	nd	0	0.1	0	0	0	0	1.23246	0	0.1	0	1	0	nd	1981	147	MTL	midpoint	1.59341	1.59341	-0.581749
713	T-3997	Sveian and Olsen 1984	Norway	Verdalsora; Granheim	63.694	11.293	1	9880	40	440	9880	40	10682.5	296.5	179.5	beach gravel	2	corr	shell	beach facies	beach facies	negative	n/a	n/a	n/a	nd	nd	nd	nd	0	0.1	0	0	0	0	1.27246	0	0.1	0	1	0	nd	1981	155	MTL	midpoint	1.62455	1.62455	-1.56796
714	T-4260	Sveian and Olsen 1984	Norway	Verdalsora; Jorem	63.9449	11.4368	1	9120	60	440	9120	60	9620	273	150	beach gravel	2	corr	shell	beach facies	beach facies	negative	n/a	n/a	n/a	nd	nd	nd	nd	0	0.1	0	0	0	0	1.01746	0	0.1	0	1	0	nd	1981	104	MTL	midpoint	1.4336	1.4336	-1.56796
715	T-4003	Sveian and Olsen 1984	Norway	Verdalsora; Sundbytterassen	63.7673	11.6109	1	8770	120	440	8770	120	9218.25	313.75	276.25	marine clay	2	corr	arctica islandica	river terraces	marine clay	negative	n/a	n/a	n/a	nd	nd	nd	nd	0	0.1	0	0	0	0	5	0	0.1	0	1	0	nd	1981	80	MTL	midpoint	5.10098	5.10098	-1.56796
716	T-4263	Sveian and Olsen 1984	Norway	Verdalsora; Follovekken	63.7973	11.6163	1	8180	120	0	8180	120	8482.5	377.5	291.5	sand silt clay sequence	0	corr	alnus log	upper terraced sand deposit	clay deposits	negative	n/a	n/a	n/a	nd	nd	nd	nd	0	0.1	0	0	0	0	3	0	0.1	0	1	0	nd	1981	71	MTL	midpoint	3.16544	3.16544	-1.56736
717	T-4262	Sveian and Olsen 1984	Norway	Verdalsora; Follobekken	63.7973	11.6163	1	8020	60	0	8020	60	8904.4	119.6	260.4	sand silt clay sequence	0	corr	pelemark	upper terraced sand deposit	clay deposits	negative	n/a	n/a	n/a	nd	nd	nd	nd	0	0.1	0	0	0	0	2.5	0	0.1	0	1	0	nd	1981	71	MTL	midpoint	2.69629	2.69629	-1.56364
718	T-4000	Sveian and Olsen 1984	Norway	Verdalsora; Mo	63.7883	11.6228	1	7460	190	440	7460	190	8172.75	467.25	308.75	delta structure	2	corr	cerasto derma edule mytilus edulis		delta structure	negative	n/a	n/a	n/a	nd	nd	nd	nd	0	0.1	0	0	0	0	4	0	0.1	0	1	0	nd	1981	59	MTL	midpoint	4.12553	4.12553	-0.595579
719	T-4001	Sveian and Olsen 1984	Norway	Verdalsora; Alstadhaug	63.7323	11.2344	1	6140	100	440	6140	100	6366	274	239	beach sediments	2	corr	sand mussels ensis ensis ostrea edulis beach snails	coarse sand	beach sediments	negative	n/a	n/a	n/a	nd	nd	nd	nd	0	0.1	0	0	0	0	0.964916	0	0.1	0	1	0	nd	1981	47	MTL	midpoint	1.3968	1.3968	-0.595579
720	T-4261	Sveian and Olsen 1984	Norway	Verdalsora; Sund	63.8616	11.3181	1	3780	60	440	3780	60	3538	221	183	beach gravel	2	corr	mytilus edulis scallops snails oysters mussels	fine beach sand	silt	negative	n/a	n/a	n/a	nd	nd	nd	nd	0	0.1	0	0	0	0	0.678712	0	0.1	0	1	0	nd	1981	21	MTL	midpoint	1.21682	1.21682	-1.00855
721	T-4002	Sveian and Olsen 1984	Norway	Verdalsora; Trones	63.826	11.4436	1	1630	70	440	1630	70	1014	214	184	beach embankment	2	corr	cockle shells	nd	beach embankment	negative	n/a	n/a	n/a	nd	nd	nd	nd	0	0.1	0	0	0	0	0.604917	0	0.1	0	1	0	nd	1981	11	MTL	midpoint	1.17725	1.17725	-1.23164
722	T-4341	Olsen 1984 (as in Moller 1987)	2	Finnmark; Makkholla; Kjelmoy	69.904	29.8203	33	3050	70		3050	70	2633	354	338	cultural layer	1		reindeer antler	nd	nd	nd	nd	nd	n/a	nd	nd	nd	nd	0	0	0	0	0	0	0.604544	0	0.1	0	1	0	nd	1987	12.2	MTL	midpoint	1.17281	1.17281	-1.31655
723	T-4815	Olsen 1984 (as in Moller 1987)	2	Finnmark; Makkholla; Kjelmoy	69.904	29.8203	34	2280	100		2280	100	2153.75	566.25	227.75	cultural layer	1		reindeer antler	nd	nd	nd	nd	nd	n/a	nd	nd	nd	nd	0	0	0	0	0	0	0.5	0	0.1	0	1	0	nd	1987	9.45	MTL	midpoint	1.1225	1.1225	-1.31655
724	T-4814	Olsen 1984 (as in Moller 1987)	2	Finnmark; Makkholla; Kjelmoy	69.904	29.8203	35	2400	110		2400	110	2556.5	205.5	553.5	cultural layer	1		charcoal	nd	nd	nd	nd	nd	n/a	nd	nd	nd	nd	0	0	0	0	0	0	0.5	0	0.1	0	1	0	nd	1987	10.05	MTL	midpoint	1.1225	1.1225	-1.00783
725	T-2743	Olsen 1984 (as in Moller 1987)	2	Finnmark; Kjelmoy; Mestersanden	69.9002	29.8815	38	1770	90		1770	90	1637.5	348.5	284.5	cultural layer	1		reindeer antler	nd	nd	nd	nd	nd	n/a	nd	nd	nd	nd	0	0	0	0	0	0	0.5	0	0.1	0	1	0	nd	1987	9	MTL	midpoint	1.1225	1.1225	-0.706061
726	T-4340	Olsen 1984 (as in Moller 1987)	2	Finnmark; Kjooy	69.8773	30.215	39	2450	110		2450	110	2559.25	289.75	458.25	cultural layer	1		charcoal	nd	nd	nd	nd	nd	n/a	nd	nd	nd	nd	0	0	0	0	0	0	0.5	0	0.1	0	1	0	nd	1987	8.55	MTL	midpoint	1.1225	1.1225	-0.706061
727	Lu-1355a	Kaland et al. 1984 (as in Lohne et al. 2007)	2	Sotra; Lommatjonn	60.2483	5.04	1	5490	130	0	5490	130	6285	351	362	nd	1	corr	not reported; assumed bulk sediment	nd	nd	negative	n/a	n/a	n/a	nd	nd	nd	nd	0	0.1	0	0	0	0	0.612174	0	0.1	0	1	0	nd	1981	11.2	MTL	midpoint	1.181	1.181	-0.706061
728	Lu-1354a	Kaland et al. 1984 (as in Lohne et al. 2007)	2	Sotra; Lommatjonn	60.2483	5.04	1	7400	200	0	7400	200	8150.33	488.667	424.333	nd	1	corr	not reported; assumed bulk sediment	nd	nd	positive	n/a	n/a	n/a	nd	nd	nd	nd	0	0.1	0	0	0	0	0.630174	0	0.1	0	1	0	nd	1981	13	MTL	midpoint	1.19043	1.19043	-0.723267
729	T-4196	Moller 1984	2	Troms	69.6365	18.01	1	3870	90	0	3870	90	4321.5	200.5	331.5	beach	3	corr	whole whale skeleton	n/a	n/a	negative	n/a	n/a	0	beachcombing	nd	nd	nd	0	0.1	0	0	0	0	0.5	0	0.1	0	1	0	nd	1981	8	MTL	midpoint	1.12694	1.12694	-0.732024
730	T-4195	Moller 1984	2	Nappstraumen	68.152	13.63	1	5890	100	440	5890	100	5970.5	264.5	278.5	sand and gravel	2	corr	ostrea edulis	sand and gravel	sand and gravel	negative	n/a	n/a	0	nd	nd	nd	nd	0	0.1	0	0	0	0	0.5	0	0.1	0	1	0	nd	1981	8	MTL	midpoint	1.12694	1.12694	-0.732024
731	T-4732A	Moller 1984 (also referenced in Vorren and Moe 1986)	2	Nappstraumen	68.0994	13.65	1	8350	60	0	8350	60	8765	261	380	peat	1	corr	Gyttja	peat	nd	positive	7	0	0	nd	nd	nd	nd	0	0.1	0	0	1.4775	0	0.5	0	0.1	0	1	0	nd	1981	-2	MTL	midpoint	1.85823	1.85823	-0.714578
732	T-4731	Moller 1984	2	Nappstraumen	68.0994	13.65	1	8040	180	0	8040	180	8868	555	388	peat	0	corr	Betula	peat	nd	positive	6	1	1	nd	nd	nd	nd	0	0.1	0	0	1.4775	0	0.5	0	0.1	0	1	0	nd	1981	-1	MTL	midpoint	1.85823	1.85823	-0.714578
733	T-4730	Moller 1984	2	Andoya	69.1764	16.0859	1	6530	100	0	6530	100	7392	193	210	shoreline	0	corr	pinus	n/a	nd	nd	n/a	n/a	n/a	beachcombing	nd	nd	nd	0	0.1	0	0	0	0	0.5	0	0.1	0	1	0	nd	1981	9	MTL	midpoint	1.12694	1.12694	-0.732008
734	T-2891a	Kaland et al. (1984)	2	Sotra; Trollabotn	60.4433	5	1	9020	200	0	9020	200	10263.5	420.5	720.5	lacustrine gyttja	1	corr	not reported; assumed bulk sediment	lacustrine gyttja	marine sediment	negative	n/a	n/a	n/a	nd	nd	nd	nd	0	0.1	0	0	0	0	0.5	0	0.1	0	1	0	nd	1981	4.8	MTL	midpoint	1.12694	1.12694	-0.40795
735	T-2786B	Kaland 1984	2	Kaland Austrheim; Longstjorn	60.7948	5.01	1	9440	110	0	9440	110	10807.8	362.25	508.75	lacustrine gyttja	1	corr	not reported; assumed bulk sediment	lacustrine gyttja	nd	negative	n/a	n/a	n/a	nd	nd	nd	nd	0	0.1	0	0	0	0	0.797	0	0.1	0	1	0	nd	1981	30.4	MTL	midpoint	1.28655	1.28655	-0.430113
736	T-2323A	Kaland 1984	2	Hopland Austrheim; Longevatn	60.7405	4.95	1	9480	170	0	9480	170	10854.7	368.333	601.667	lacustrine gyttja	1	corr	not reported; assumed bulk sediment	lacustrine gyttja	marine sediment	negative	n/a	n/a	n/a	nd	nd	nd	nd	0	0.1	0	0	0	0	0.609221	0	0.1	0	1	0	nd	1981	10.9	MTL	midpoint	1.17947	1.17947	-0.430113
737	T-2273B	Kaland 1984	2	Hopland Austrheim; Longevatn	60.7405	4.95	1	7190	80	0	7190	80	8031.5	287.5	289.5	lacustrine gyttja	1	corr	not reported; assumed bulk sediment	lacustrine gyttja	marine sediment	positive	n/a	n/a	n/a	nd	nd	nd	nd	0	0.1	0	0	0	0	0.609221	0	0.1	0	1	0	nd	1981	10.9	MTL	midpoint	1.17947	1.17947	-0.393884
738	T-2274B	Kaland 1984	2	Hopland Austrheim; Longevatn	60.7405	4.95	1	5950	70	0	5950	70	6820.75	335.25	328.75	lacustrine gyttja	1	corr	not reported; assumed bulk sediment	lacustrine gyttja	marine sediment	negative	n/a	n/a	n/a	nd	nd	nd	nd	0	0.1	0	0	0	0	0.609221	0	0.1	0	1	0	nd	1981	10.9	MTL	midpoint	1.17947	1.17947	-0.393884
739	T-835	Kaland 1984	2	Fonnes Austrheim; Blautamyr	60.8044	4.97	1	5260	90	0	5260	90	6073.5	229.5	353.5	lacustrine gyttja	1	corr	not reported; assumed bulk sediment	lacustrine gyttja	marine sediment	negative	n/a	n/a	n/a	nd	nd	nd	nd	0	0.1	0	0	0	0	0.5	0	0.1	0	1	0	nd	1981	9.3	MTL	midpoint	1.12694	1.12694	-0.393884
740	T-1475	Kaland 1984	2	Fonnes Austrheim; Lomtjorn	60.793	4.98	1	9170	140	0	9170	140	10364.5	697.5	597.5	lacustrine gyttja	1	corr	not reported; assumed bulk sediment	lacustrine gyttja	marine sediment	negative	n/a	n/a	n/a	nd	nd	nd	nd	0	0.1	0	0	0	0	0.5	0	0.1	0	1	0	nd	1981	7.2	MTL	midpoint	1.12694	1.12694	-0.592266
741	T-1276	Kaland 1984 (also in Bondevik et al. 1998)	2	Fonnes Austrheim; Lomtjorn	60.793	4.98	1	4130	120	0	4130	120	4659	552	506	lacustrine gyttja	1	corr	not reported; assumed bulk sediment	lacustrine gyttja	marine sediment	negative	n/a	n/a	n/a	nd	nd	nd	nd	0	0.1	0	0	0	0	0.5	0	0.1	0	1	0	nd	1981	7.2	MTL	midpoint	1.12694	1.12694	-0.740939
742	T-2175	Kaland 1984	2	Fonnes Austrheim; Altersvatn	60.8024	4.96	1	8590	160	0	8590	160	9742.25	435.75	603.25	lacustrine gyttja	1	corr	not reported; assumed bulk sediment	marine sediments	lacustrine gyttja	negative	n/a	n/a	n/a	nd	nd	nd	nd	0	0.1	0	0	0	0	0.5	0	0.1	0	1	0	nd	1981	3.9	MTL	midpoint	1.12694	1.12694	-0.59546
743	T-2174	Kaland 1984	2	Fonnes Austrheim; Altersvatn	60.8024	4.96	1	2580	60	0	2580	60	2634	287	284	lacustrine gyttja	1	corr	not reported; assumed bulk sediment	lacustrine gyttja	marine sediment	negative	n/a	n/a	n/a	nd	nd	nd	nd	0	0.1	0	0	0	0	0.5	0	0.1	0	1	0	nd	1981	3.9	MTL	midpoint	1.12694	1.12694	-0.740939
744	T-2176A	Kaland 1984	2	Fonnes Austrheim; Vestretjorn	60.7988	4.98	1	1900	60	0	1900	60	1859	250	314	lacustrine gyttja	1	corr	not reported; assumed bulk sediment	lacustrine gyttja	marine sediment	negative	n/a	n/a	n/a	nd	nd	nd	nd	0	0.1	0	0	0	0	0.5	0	0.1	0	1	0	nd	1981	2.4	MTL	midpoint	1.12694	1.12694	-0.740602
745	T-2776B	Kaland 1984	2	Vorland Bomlo; Vorlandstjonn	59.6114	5.22	1	9800	90	0	9800	90	11170.3	531.667	421.333	lacustrine gyttja	1	corr	not reported; assumed bulk sediment	lacustrine gyttja	marine sediment	negative	n/a	n/a	n/a	nd	nd	nd	nd	0	0.1	0	0	0	0	0.66119	0	0.1	0	1	0	nd	1981	16.1	MTL	midpoint	1.20713	1.20713	-0.740464
746	T-2777A	Kaland 1984	2	Eide Bomlo; Eidestjonn	59.6024	5.2	1	9410	120	0	9410	120	10780.4	360.625	525.375	lacustrine gyttja	1	corr	not reported; assumed bulk sediment	lacustrine gyttja	marine sediment	negative	n/a	n/a	n/a	nd	nd	nd	nd	0	0.1	0	0	0	0	0.5	0	0.1	0	1	0	nd	1981	8	MTL	midpoint	1.12694	1.12694	-0.592266
747	T-2780A	Kaland 1984	2	Eide Bomlo; Eidestjonn	59.6024	5.2	1	5370	90	0	5370	90	6136.1	303.9	369.1	lacustrine gyttja	1	corr	not reported; assumed bulk sediment	lacustrine gyttja	marine sediment	negative	n/a	n/a	n/a	nd	nd	nd	nd	0	0.1	0	0	0	0	0.5	0	0.1	0	1	0	nd	1981	8	MTL	midpoint	1.12694	1.12694	-0.604144
748	T-2781A	Kaland 1984	2	Hovland Bomlo; Aurebettjonn	59.6071	5.24	1	2630	100	0	2630	100	2622.75	436.25	271.75	lacustrine gyttja	1	corr	not reported; assumed bulk sediment	lacustrine gyttja	marine sediment	negative	n/a	n/a	n/a	nd	nd	nd	nd	0	0.1	0	0	0	0	0.5	0	0.1	0	1	0	nd	1981	4.9	MTL	midpoint	1.12694	1.12694	-0.676071
749	T-2779A	Kaland 1984	2	Hovland Bomlo; Aurebettjonn	59.6071	5.24	1	8670	90	0	8670	90	9650.5	506.5	185.5	lacustrine gyttja	1	corr	not reported; assumed bulk sediment	marine sediments	lacustrine gyttja	positive	n/a	n/a	n/a	nd	nd	nd	nd	0	0.1	0	0	0	0	0.5	0	0.1	0	1	0	nd	1981	4.9	MTL	midpoint	1.12694	1.12694	-0.591134
750	T-2778A	Kaland 1984	2	Hovland Bomlo; Aurebettjonn	59.6071	5.24	1	9090	80	0	9090	80	10292	288	507	lacustrine gyttja	1	corr	not reported; assumed bulk sediment	lacustrine gyttja	marine sediment	negative	n/a	n/a	n/a	nd	nd	nd	nd	0	0.1	0	0	0	0	0.5	0	0.1	0	1	0	nd	1981	4.9	MTL	midpoint	1.12694	1.12694	-0.433529
751	T-2896a	Krzywinski and Stabell 1984 (as in Lohne et al 2007)	2	Sotra; Klaesvatn	60.1967	5.06	1	12080	210	0	12080	210	13986	932	491	lacustrine gyttja	1	corr	not reported; assumed bulk sediment	marine sediments	lacustrine gyttja	positive	n/a	n/a	n/a	nd	nd	nd	nd	0	0.1	0	0	0	0	0.799423	0	0.1	0	1	0	nd	1981	30.5	MTL	midpoint	1.28805	1.28805	-0.433529
752	Lu-1552	Krzywinski and Stabell 1984 (as in Lohne et al 2007)	2	Sotra; Kvernavatn	60.3767	5.05	1	10870	195	0	10870	195	12914.2	375.75	809.25	lacustrine gyttja	1	corr	not reported; assumed bulk sediment	lacustrine gyttja	lacustrine gyttja	positive	n/a	n/a	n/a	nd	nd	nd	nd	0	0.1	0	0	0	0	0.875068	0	0.1	0	1	0	nd	1981	38.2	MTL	midpoint	1.33632	1.33632	-0.433529
753	T-2636	Krzywinski and Stabell 1984 (as in Lohne et al 2007)	2	Sotra; Storetjonn	60.2017	5.07	1	10180	120	0	10180	120	11691.8	779.25	411.75	lacustrine gyttja	1	corr	not reported; assumed bulk sediment	lacustrine gyttja	marine gyttja	negative	n/a	n/a	n/a	nd	nd	nd	nd	0	0.1	0	0	0	0	0.858181	0	0.1	0	1	0	nd	1981	35.8	MTL	midpoint	1.32532	1.32532	-0.430455
754	T-2892a	Krzywinski and Stabell 1984 (as in Lohne et al 2007)	2	Sotra; Kvernavatn	60.3767	5.05	1	9980	180	0	9980	180	11566.5	890.5	773.5	brackish facies	1	corr	not reported; assumed bulk sediment	marine sediments	lacustrine gyttja	positive	n/a	n/a	n/a	nd	nd	nd	nd	0	0.1	0	0	0	0	0.882239	0	0.1	0	1	0	nd	1981	38.2	MTL	midpoint	1.34102	1.34102	-1.23176
755	T-2889a	Krzywinski and Stabell 1984 (as in Lohne et al 2007)	2	Sotra; Krokavatn	60.385	5.01	1	10150	120	0	10150	120	11572.8	892.25	311.75	lacustrine gyttja	1	corr	not reported; assumed bulk sediment	lacustrine gyttja	marine sediments	negative	n/a	n/a	n/a	nd	nd	nd	nd	0	0.1	0	0	0	0	0.847239	0	0.1	0	1	0	nd	1981	34.7	MTL	midpoint	1.31826	1.31826	-1.23176
756	Lu-1529a	Krzywinski and Stabell 1984 (as in Lohne et al 2007)	2	sotra; Tresstjonn	60.3867	5	1	10260	100	0	10260	100	12240.2	359.75	838.25	marine sediments	1	corr	not reported; assumed bulk sediment	lacustrine gyttja	marine sediments	negative	n/a	n/a	n/a	nd	nd	nd	nd	0	0.1	0	0	0	0	0.825239	0	0.1	0	1	0	nd	1981	32.5	MTL	midpoint	1.30423	1.30423	-0.252592
757	T-2885a	Krzywinski and Stabell 1984 (as in Lohne et al 2007)	2	Sotra; klaesvatn	60.1967	5.06	1	9970	130	0	9970	130	11543.7	878.333	725.667	silty transition facies	1	corr	not reported; assumed bulk sediment	gyttja	clay	negative	n/a	n/a	n/a	nd	nd	nd	nd	0	0.1	0	0	0	0	0.805173	0	0.1	0	1	0	nd	1981	30.5	MTL	midpoint	1.29163	1.29163	-0.241902
758	T-2632	Krzywinski and Stabell 1984 (as in Lohne et al 2007)	2	Sotra; Hamravatn	60.2067	5.09	1	10130	120	0	10130	120	11572	889	325	brackish facies	1	corr	not reported; assumed bulk sediment	lacustrine gyttja	marine sediment	negative	n/a	n/a	n/a	nd	nd	nd	nd	0	0.1	0	0	0	0	0.791202	0	0.1	0	1	0	nd	1981	29.1	MTL	midpoint	1.28297	1.28297	-0.380766
759	Lu-1503a	Krzywinski and Stabell 1984 (as in Lohne et al 2007)	2	Sotra; sekkingstadtjonn	60.35	4.99	1	9920	90	0	9920	90	11483.5	445.5	588.5	brackish facies	1	corr	not reported; assumed bulk sediment	lacustrine gyttja	marine sediment	negative	n/a	n/a	n/a	nd	nd	nd	nd	0	0.1	0	0	0	0	0.740208	0	0.1	0	1	0	nd	1981	24	MTL	midpoint	1.25216	1.25216	-1.02408
760	T-2888a	Krzywinski and Stabell 1984 (as in Lohne et al 2007)	2	Sotra; storevatn	60.1817	5.06	1	9470	110	0	9470	110	10894.2	295.75	589.25	lacustrine gyttja	1	corr	not reported; assumed bulk sediment	lacustrine gyttja	lacustrine gyttja	negative	n/a	n/a	n/a	nd	nd	nd	nd	0	0.1	0	0	0	0	0.726173	0	0.1	0	1	0	nd	1981	22.6	MTL	midpoint	1.24392	1.24392	-1.02404
761	T-5457A	Anundsen and Fjeldskaar 1983 (as in Helle et al. 2007)	2	Yrkje; Tinghaugmyra	59.4008	5.66	1	9730	210	0	9730	210	11003.8	924.25	579.75	Gyttja-rich lake sediments	1	corr	bulk gyttja	lacustrine gyttja	lacustrine gyttja	negative	n/a	n/a	n/a	nd	nd	nd	nd	0	0.1	0	0	0	0	0.840237	0	0.1	0	1	0	nd	1983	34	MSL	midpoint	1.31377	1.31377	-1.02404
762	T-5456A	Anundsen and Fjeldskaar 1983 (as in Helle et al. 2007)	2	Yrkje; Tinghaugmyra	59.4008	5.66	1	11350	210	0	11350	210	13310.8	424.25	546.75	Gyttja-rich brackish-marine sediments	1	corr	bulk gyttja	marine gyttja	lacustrine gyttja	positive	n/a	n/a	n/a	nd	nd	nd	nd	0	0.1	0	0	0	0	0.840237	0	0.1	0	1	0	nd	1983	34	MSL	midpoint	1.31377	1.31377	-1.0161
763	T-4053	Anundsen and Fjeldskaar 1983 (as in Helle et al. 2007)	2	Yrkje; Tinghaugmyra	59.4008	5.66	1	11720	150	0	11720	150	13634	387	391	Gyttja-rich brackish-marine sediments	1	corr	bulk gyttja	marine gyttja	lacustrine gyttja	positive	n/a	n/a	n/a	nd	nd	nd	nd	0	0.1	0	0	0	0	0.84	0	0.1	0	1	0	nd	1983	34	MSL	midpoint	1.31362	1.31362	-1.02545
764	T-3780C	Anundsen and Fjeldskaar 1983 (also in Helle et al. 2007)	2	Yrkje	59.3953	5.66	1	11940	160	0	11940	160	13769.2	1006.75	417.25	marine gyttja	1	corr	gyttja	marine gyttja	marine gyttja	negative	n/a	n/a	n/a	nd	nd	nd	nd	0	0.1	0	0	0	0	0.8	0	0.1	0	1	0	nd	1983	30	MTL	midpoint	1.28841	1.28841	-1.2055
765	T-4826	Hultgren 1983 (as in Moller 1987)	2	Nordland; Stiurhelleren	66.2997	13.49	71	4170	80		4170	80	4705.38	149.625	281.375	cultural layer	2		marine shell	nd	nd	nd	nd	nd	n/a	nd	nd	nd	nd	0	0	0	0	0	0	0.795395	0	0.1	0	1	0	nd	1987	31	MTL	midpoint	1.28166	1.28166	-1.04051
766	T-4827	Hultgren 1983 (as in Moller 1987)	2	Nordland; Stiurhelleren	66.2997	13.49	72	4320	100		4320	100	4236	315	348	cultural layer	2		shell	nd	nd	nd	nd	nd	n/a	nd	nd	nd	nd	0	0	0	0	0	0	0.790395	0	0.1	0	1	0	nd	1987	30.5	MTL	midpoint	1.27856	1.27856	-0.430455
767	T-6779	Thomsen 1983 (as in Prosch-Danielsen 2006)	2	Jaeren; Sele-Bybergsletten	58.834	5.5721	1	4860	50	0	4860	50	4937	345	302	sand layers with twigs	1	corr	bulk gyttja	nd	coarse sand	nd	3.7	5.3	n/a	nd	nd	nd	nd	0	0.1	0	0	0	0	0.5	0	0.1	0	1	0	nd	1983	5.3	MTL	midpoint	1.12694	1.12694	-0.430455
768	Tua-1599a	Thomsen 1983 (as in Prosch-Danielsen 2006)	2	Jaeren; Sele-Bybergsletten; Alvevatnet	58.811	5.56922	1	8145	65	0	8145	65	9144.5	282.5	492.5	lacustrine gyttja	1	corr	fine detritus gyttja	fine detritus gyttja	fine detritus gyttja	nd	2.3	nd	n/a	nd	nd	nd	nd	0	0.1	0	0	0	0	0.5	0	0.1	0	1	0	nd	1983	10.2	MTL	midpoint	1.12694	1.12694	-0.430455
769	T-5120	Blystad 1983 (as in prosch-danielsen 2006)	2	Rennesoy: Galta	59.1329	5.6092	1	12420	160	0	12420	160	14664.7	477.333	607.667	nd	3	corr	balaena mysticus right whale	nd	nd	nd	n/a	n/a	n/a	nd	nd	nd	nd	0	0.1	0	0	0	0	0.67	0	0.1	0	1	0	nd	1983	17	MSL	midpoint	1.21198	1.21198	-0.430902
770	T-3958A	Lie et al 1983 (also in Kristiansen et al 1988 )	2	Alesund; Saudedalsmyra	62.4292	6.24	1	11130	140	0	11130	140	12303.5	388.5	536.5	silty diatomite silt	1	corr	bulk gyttja	fine detritus gyttja	silt and clay	negative	n/a	n/a	n/a	nd	nd	nd	nd	0	0.1	0	0	0	0	0.800424	0	0.1	0	1	0	nd	1983	30	MTL	midpoint	1.28867	1.28867	-0.436696
771	T-3553A	Lie et al 1983 (also in Kristiansen et al 1988 )	2	Alesund; Torvlovmyra	62.4296	6.24	1	11780	80	0	11780	80	13623.2	387.75	265.25	silty gyttja	1	corr	bulk gyttja	silty gyttja with plant macrofossils	laminated silt and clay	negative	n/a	n/a	n/a	nd	nd	nd	nd	0	0.1	0	0	0	0	0.850424	0	0.1	0	1	0	nd	1983	35	MTL	midpoint	1.32031	1.32031	-0.436696
772	T-3553B	Lie et al 1983 (also in Kristiansen et al 1988 )	2	Alesund; Torvlovmyra	62.4296	6.24	1	11750	120	0	11750	120	13620.9	396.125	307.875	silty gyttja	1	corr	bulk gyttja	silty gyttja with plant macrofossils	laminated silt and clay	negative	n/a	n/a	n/a	nd	nd	nd	nd	0	0.1	0	0	0	0	0.850424	0	0.1	0	1	0	nd	1983	35	MTL	midpoint	1.32031	1.32031	-0.436696
773	T-3957A	Lie et al 1983 (also in Kristiansen et al 1988 )	2	Alesund; Lerstadsvatn	62.4679	6.3	1	12650	230	0	12650	230	14847.5	865.5	766.5	silt and clay	1	corr	bulk gyttja	silty gyttja and clay	diatomaceous silt	negative	n/a	n/a	n/a	nd	nd	nd	nd	0	0.1	0	0	0	0	0.940414	0	0.1	0	1	0	nd	1983	44	MTL	midpoint	1.37999	1.37999	-0.436696
774	T-3552B	Lie et al 1983	2	Sunnmore; gjolvatn	62.4283	6.25	1	9760	110	0	9760	110	10970.8	723.167	280.833	silty gyttja	1	corr	Gyttja	lacustrine gyttja	marine gyttja	negative	6.2	n/a	n/a	nd	nd	nd	nd	0	0.1	0	0	0	0	0.733426	0	0.1	0	1	0	nd	1983	23.3	MTL	midpoint	1.24816	1.24816	-0.433529
775	T-3035	Hald and Vorren 1983 ( as in Moller 1987)	2	Tromso	70.2087	19.15	1	5790	90	440	5790	90	6553.5	272.5	195.5	shore ridge	2	corr	arctica islandica	nd	nd	negative	nd	nd	0	outcrop	nd	nd	nd	0	0.1	0	0	0	0	0.5	0	0.1	0	1	0	nd	1983	11	MTL	midpoint	1.12694	1.12694	-0.433529
776	T-4471	Hald and Vorren 1983 ( as in Moller 1987)	2	Tromso	69.8064	18.74	1	8350	90	0	8350	90	8512.5	353.5	215.5	sand and gravel	0	corr	betula pubescens and salix	sand and gravel	diamicton	negative	4.5	5	0	outcrop	0.01	measured	nd	0	0.1	0	0	0	0	0.5	0	0.1	0	1	0	nd	1983	5	MTL	midpoint	1.12694	1.12694	-0.433529
777	T-2998A	Anundsen and Feldsjaar 1983	2	Yrkje; 30m lake	59.3953	5.66	1	10530	130	440	10530	130	12353.6	381.375	356.625	marine gyttja	2	corr	diatoms	marine gyttja	marine gyttja	negative	n/a	n/a	n/a	nd	nd	nd	nd	0	0.1	0	0	0	0	0.8	0	0.1	0	1	0	nd	1983	30	MTL	midpoint	1.28841	1.28841	-1.21197
778	T-2999A	Anundsen and Feldsjaar 1983	2	Yrkje; 30m lake	59.3953	5.66	1	9910	90	440	9910	90	10526.5	326.5	309.5	brackish gyttja	2	corr	molluscs	lacustrine gyttja	marine gyttja	negative	n/a	n/a	n/a	nd	nd	nd	nd	0	0.1	0	0	0	0	0.800233	0	0.1	0	1	0	nd	1983	30	MTL	midpoint	1.28855	1.28855	-1.21197
779	T-3780A	Anundsen and Feldsjaar 1983	2	Yrkje; 30m lake	59.3953	5.66	1	11260	310	0	11260	310	12425.5	670.5	961.5	marine gyttja	1	corr	gyttja	marine gyttja	marine gyttja	negative	n/a	n/a	n/a	nd	nd	nd	nd	0	0.1	0	0	0	0	0.8	0	0.1	0	1	0	nd	1983	30	MTL	midpoint	1.28841	1.28841	-1.21051
780	T-3219A	Anundsen and Feldsjaar 1983	2	Yrkje; 25m lake	59.3961	5.66	1	9850	100	0	9850	100	11456	357	673	brackish gyttja	1	corr	bulk gyttja	lacustrine gyttja	marine gyttja	negative	n/a	n/a	n/a	nd	nd	nd	nd	0	0.1	0	0	0	0	0.750233	0	0.1	0	1	0	nd	1983	25	MTL	midpoint	1.25811	1.25811	-1.21051
781	T-3583A	Anundsen and Feldsjaar 1983	2	Yrkje; 38m lake	59.3983	5.67	1	10280	180	0	10280	180	12243.6	427.375	908.625	brackish gyttja	1	corr	bulk gyttja	lacustrine gyttja	marine gyttja	negative	n/a	n/a	n/a	nd	nd	nd	nd	0	0.1	0	0	0	0	0.880242	0	0.1	0	1	0	nd	1983	38	MTL	midpoint	1.33971	1.33971	-1.21051
782	T-3362A	Anundsen and Feldsjaar 1983	2	Yrkje; 38m lake	59.3983	5.67	1	10380	170	0	10380	170	12136	592	731	brackish gyttja	1	corr	bulk gyttja	marine gyttja	lacustrine gyttja	positive	n/a	n/a	n/a	nd	nd	nd	nd	0	0.1	0	0	0	0	0.880242	0	0.1	0	1	0	nd	1983	38	MTL	midpoint	1.33971	1.33971	-1.01744
783	T-3403A	Anundsen and Feldsjaar 1983	2	Yrkje; 38m lake	59.3983	5.67	1	10850	170	0	10850	170	12884.5	293.5	776.5	lacustrine gyttja	1	corr	bulk gyttja	lacustrine gyttja	lacustrine gyttja	positive	n/a	n/a	n/a	nd	nd	nd	nd	0	0.1	0	0	0	0	0.876118	0	0.1	0	1	0	nd	1983	38	MTL	midpoint	1.33701	1.33701	-1.01744
784	T-3404	Anundsen and Feldsjaar 1983	2	Yrkje; 38m lake	59.3983	5.67	1	11460	190	0	11460	190	13271	501	348	lacustrine gyttja	1	corr	bulk gyttja	lacustrine gyttja	lacustrine gyttja	positive	n/a	n/a	n/a	nd	nd	nd	nd	0	0.1	0	0	0	0	0.876118	0	0.1	0	1	0	nd	1983	38	MTL	midpoint	1.33701	1.33701	-1.19685
785	T-4149A	Anundsen and Feldsjaar 1983	2	Yrkje; 34m lake	59.4008	5.66	1	11300	150	0	11300	150	13203	367	370	lacustrine gyttja	1	corr	bulk gyttja	marine gyttja	lacustrine gyttja	positive	n/a	n/a	n/a	nd	nd	nd	nd	0	0.1	0	0	0	0	0.84	0	0.1	0	1	0	nd	1983	34	MTL	midpoint	1.31362	1.31362	-1.21238
786	T-4052A	Anundsen and Feldsjaar 1983	2	Yrkje; 34m lake	59.4008	5.66	1	11440	110	0	11440	110	13258.8	336.25	168.75	lacustrine gyttja	1	corr	bulk gyttja	marine gyttja	lacustrine gyttja	positive	n/a	n/a	n/a	nd	nd	nd	nd	0	0.1	0	0	0	0	0.840237	0	0.1	0	1	0	nd	1983	34	MTL	midpoint	1.31377	1.31377	-1.18977
787	T-4051A	Anundsen and Feldsjaar 1983	2	Yrkje; 34m lake	59.4008	5.66	1	12280	90	0	12280	90	14455.2	491.833	637.167	brackish gyttja	1	corr	bulk gyttja	lacustrine gyttja	marine gyttja	negative	n/a	n/a	n/a	nd	nd	nd	nd	0	0.1	0	0	0	0	0.84	0	0.1	0	1	0	nd	1983	34	MTL	midpoint	1.31362	1.31362	-1.20034
788	T-4321A	Kjemperud 1982	2	Trondheimsfjord; Svartdalstjernet	63.53	8.97	1	12210	160	0	12210	160	14276.5	712.5	660.5	fine detritus gyttja	1	corr	not reported; assumed bulk sediment	fine detritus gyttja	marine clay	negative	n/a	n/a	n/a	nd	nd	nd	nd	0	0.1	0	0	0	0	0.969164	0	0.1	0	1	0	nd	1981	95	MTL	midpoint	1.39974	1.39974	-1.20034
789	T-1808	Pettersen 1982 (as in Moller 1987)	2	Nordland; Mohalsen	65.661	11.7913	1	8440	190		8440	190	9258.33	863.667	485.333	cultural layer	1		oak	nd	nd	nd	nd	nd	n/a	nd	nd	nd	nd	0	0	0	0	0	0	0.902733	0	0.1	0	1	0	nd	1987	82	MTL	midpoint	1.3509	1.3509	-1.20741
790	T-1807	Pettersen 1982 (as in Moller 1987)	2	Nordland; Mohalsen	65.661	11.7913	1	9350	270		9350	270	10746.2	567.75	1061.25	cultural layer	1		oak/willow	nd	nd	nd	nd	nd	n/a	nd	nd	nd	nd	0	0	0	0	0	0	0.902733	0	0.1	0	1	0	nd	1987	82	MTL	midpoint	1.3509	1.3509	-1.20741
791	T-3993	Pettersen 1982 (as in Moller 1987)	2	Nordland; Langasen	65.7102	11.8875	75	4700	100		4700	100	5469.75	244.25	585.75	cultural layer	1		birch/willow	nd	nd	nd	nd	nd	n/a	nd	nd	nd	nd	0	0	0	0	0	0	0.745511	0	0.1	0	1	0	nd	1987	26	MTL	midpoint	1.25131	1.25131	-1.20241
792	T-3059	Pettersen 1982 (as in Moller 1987)	2	Nordland; Langasen	65.7102	11.8875	76	2850	70		2850	70	2958	381	228	cultural layer	1		deerbone	nd	nd	nd	nd	nd	n/a	nd	nd	nd	nd	0	0	0	0	0	0	0.745511	0	0.1	0	1	0	nd	1987	26	MTL	midpoint	1.25131	1.25131	-1.20738
793	T-3058	Pettersen 1982 (as in Moller 1987)	2	Nordland; Langasen	65.7102	11.8875	77	2760	60		2760	60	2846.5	365.5	352.5	cultural layer	1		deerbone	nd	nd	nd	nd	nd	n/a	nd	nd	nd	nd	0	0	0	0	0	0	0.745511	0	0.1	0	1	0	nd	1987	26	MTL	midpoint	1.25131	1.25131	-1.1947
794	T-3656A	Reite et al. 1982 ( as in Svendsen and Mangerud 1987 )	2	Trondheimsfjord; Afjord	64.0155	10.48	1	10040	50	0	10040	50	11602.8	330.25	357.75	limnic sediments	1	corr	gyttja	limnic organic sediments	shell-bearing marine clay		n/a	n/a	n/a	nd	nd	nd	nd	0	0.1	0	0	0	0	1.01994	0	0.1	0	1	0	nd	1982	104	MTL	midpoint	1.43536	1.43536	-1.2109
795	T-3655	Reite et al. 1982 ( as in Svendsen and Mangerud 1987 )	2	Trondheimsfjord; Afjord	64.0155	10.48	1	11480	50	440	11480	50	13365	98	124	shell-bearing marine clay	2	corr	Macoma calcarea	limnic organic sediments	shell-bearing marine clay		n/a	n/a	n/a	nd	nd	nd	nd	0	0.1	0	0	0	0	1.02	0	0.1	0	1	0	nd	1982	104	MTL	midpoint	1.43541	1.43541	-0.313242
796	T-3844	Ramfjord 1982	2	Naeroy; N. Lisetjonn	64.8355	11.42	1	10340	250	0	10340	250	11369.5	824.5	810.5	gyttja with clay	1	corr	Gyttja	coarse detrital gyttja	marine clay	negative	n/a	n/a	n/a	nd	nd	nd	nd	0	0.1	0	0	0	0	1.11497	0	0.1	0	1	0	nd	1982	123	MTL	midpoint	1.50438	1.50438	-0.313242
797	TT-3843	Ramfjord 1982	2	Naeroy; Kvennhusvatn	64.9302	11.6	1	9230	130	0	9230	130	10464.5	604.5	552.5	gyttja	1	corr	Gyttja	algae gyttja	marine clay	negative	n/a	n/a	n/a	nd	nd	nd	nd	0	0.1	0	0	0	0	1.05496	0	0.1	0	1	0	nd	1982	111	MTL	midpoint	1.46046	1.46046	-0.313242
798	T-3807	Ramfjord 1982	2	Naeroy; Lomstjonn	64.8795	11.67	1	8450	80	0	8450	80	9404.5	284.5	373.5	gyttja	1	corr	Gyttja	fine detritus gyttja	coarse detritus gyttja	negative	n/a	n/a	n/a	nd	nd	nd	nd	0	0.1	0	0	0	0	1.009	0	0.1	0	1	0	nd	1982	103	MTL	midpoint	1.42761	1.42761	-0.313242
799	T-2844	Ramfjord 1982	2	Naeroy; Blavasstjonn	64.9104	11.66	1	8950	260	0	8950	260	10001	1060	670	gyttja	1	corr	Gyttja	algae gyttja	marine clay	negative	n/a	n/a	n/a	nd	nd	nd	nd	0	0.1	0	0	0	0	0.959966	0	0.1	0	1	0	nd	1982	92	MTL	midpoint	1.39339	1.39339	-0.311608
800	T-2845	Ramfjord 1982	2	Naeroy; Blavasstjonn	64.9104	11.66	1	8000	160	0	8000	160	8756	648	331	gyttja	1	corr	Gyttja	fine detritus gyttja	fine detritus gyttja	negative	n/a	n/a	n/a	nd	nd	nd	nd	0	0.1	0	0	0	0	0.953931	0	0.1	0	1	0	nd	1982	92	MTL	midpoint	1.38924	1.38924	-0.387082
801	T-2847	Ramfjord 1982	2	Naeroy; Gorrtjonn	64.9259	11.65	1	8680	230	0	8680	230	9905.25	430.75	875.25	gyttja	1	corr	Gyttja	coarse detrital gyttja	fine detritus gyttja	negative	n/a	n/a	n/a	nd	nd	nd	nd	0	0.1	0	0	0	0	0.829963	0	0.1	0	1	0	nd	1982	66	MTL	midpoint	1.30723	1.30723	-0.387082
802	T-3043A	Ramfjord 1982	2	Naeroy; Gorrtjonn	64.9259	11.65	1	8280	150	0	8280	150	9275.5	272.5	625.5	gyttja	1	corr	Gyttja	coarse detrital gyttja	fine detritus gyttja	negative	n/a	n/a	n/a	nd	nd	nd	nd	0	0.1	0	0	0	0	0.823889	0	0.1	0	1	0	nd	1982	66	MTL	midpoint	1.30338	1.30338	-0.384953
803	T-3738	Ramfjord 1982	2	Naeroy; Lomtjonn	64.9097	11.6	1	6180	90	0	6180	90	7144	274	403	gyttja	1	corr	Gyttja	fine detritus gyttja	algae gyttja	negative	n/a	n/a	n/a	nd	nd	nd	nd	0	0.1	0	0	0	0	0.753918	0	0.1	0	1	0	nd	1982	52	MTL	midpoint	1.26031	1.26031	-0.384953
804	T-3805IIA	Ramfjord 1982	2	Naeroy; Strandavatn	64.9106	11.54	1	7080	110	0	7080	110	7902.33	278.667	284.333	gyttja	1	corr	Gyttja	coarse detrital gyttja	marine clay	negative	n/a	n/a	n/a	nd	nd	nd	nd	0	0.1	0	0	0	0	0.979925	0	0.1	0	1	0	nd	1982	48	MTL	midpoint	1.40721	1.40721	-1.26243
805	T-3806	Ramfjord 1982	2	Naeroy; Loypmotjonn	64.8305	11.37	1	3750	110	0	3750	110	4109	412	412	gyttja	1	corr	Gyttja	fine detrital gyttja	marine clay	negative	n/a	n/a	n/a	nd	nd	nd	nd	0	0.1	0	0	0	0	0.679935	0	0.1	0	1	0	nd	1982	18	MTL	midpoint	1.2175	1.2175	-1.25989
806	T-3845	Ramfjord 1982	2	Naeroy; Osavatn	64.9516	11.69	1	1570	185	0	1570	185	1392.5	549.5	387.5	gyttja	1	corr	Gyttja	algae gyttja	marine clay	negative	n/a	n/a	n/a	nd	nd	nd	nd	0	0.1	0	0	0	0	0.5	0	0.1	0	1	0	nd	1982	7	MTL	midpoint	1.12694	1.12694	-1.25989
807	T-2565	Thomsen 1982 (also in Prosch-Danielsen 1993 and Helle et al 2007 )	2	Vistevika; kulebergmyra	58.9878	5.6	1	13100	190	0	13100	190	15722	609	628	lacustrine-brackish facies	1	corr	bulk gyttja	lacustring gyttja	marine silt	negative	n/a	n/a	n/a	nd	nd	nd	nd	0	0.1	0	0	0	0	0.712064	0	0.1	0	1	0	nd	1982	21.5	MTL	midpoint	1.23573	1.23573	-1.24885
808	T-3300A	Thomsen 1982	2	Vistevika; kulebergmyra	58.9878	5.6	1	10130	140	0	10130	140	11575.5	891.5	333.5	lacustrine gyttja	1	corr	bulk gyttja	marine silt	lacustrine gyttja	positive	n/a	n/a	n/a	nd	nd	nd	nd	0	0.1	0	0	0	0	1.5	0	0.1	0	1	0	nd	1982	21.5	MTL	midpoint	1.80831	1.80831	-1.25978
809	T-3501A	Thomsen 1982	2	Vistevika; kulebergmyra	58.9878	5.6	1	10190	150	0	10190	150	11890.4	690.583	623.417	lacustrine gyttja	1	corr	bulk gyttja	marine silt	lacustrine gyttja	positive	n/a	n/a	n/a	nd	nd	nd	nd	0	0.1	0	0	0	0	1.5	0	0.1	0	1	0	nd	1982	21.5	MTL	midpoint	1.80831	1.80831	-1.25618
810	T-3501A	Thomsen 1982	2	Vistevika; kulebergmyra	58.9878	5.6	1	10480	210	0	10480	210	12326.5	505.5	922.5	lacustrine gyttja	1	corr	bulk gyttja	brackish gyttja	lacustrine gyttja	positive	n/a	n/a	n/a	nd	nd	nd	nd	0	0.1	0	0	0	0	1.5	0	0.1	0	1	0	nd	1982	21.5	MTL	midpoint	1.80831	1.80831	-1.25646
811	T-3143	Thomsen 1982	2	Vistevika; hallandsvannet	58.9844	5.62	1	10530	190	0	10530	190	12297.9	596.071	653.929	Marine gyttja	1	corr	bulk gyttja	marine sand	marine gyttja	negative	n/a	n/a	n/a	nd	nd	nd	nd	0	0.1	0	0	0	0	0.5	0	0.1	0	1	0	nd	1982	5.5	MTL	midpoint	1.12694	1.12694	-1.25103
812	T-3298A	Thomsen 1982	2	Vistevika; Madlamyra	58.9471	5.67	1	13160	140	0	13160	140	15798	482	514	gyttja	1	corr	bulk gyttja	gyttja with silt	gyttja with clay	negative	n/a	n/a	n/a	nd	nd	nd	nd	0	0.1	0	0	0	0	0.645165	0	0.1	0	1	0	nd	1982	14.5	MTL	midpoint	1.19843	1.19843	-1.26028
813	T3299A	Thomsen 1982	2	Vistevika; Madlamyra	58.9471	5.67	1	11270	160	0	11270	160	13195.5	294.5	422.5	gyttja with silt	1	corr	bulk gyttja	silty gyttja	gyttja	negative	n/a	n/a	n/a	nd	nd	nd	nd	0	0.1	0	0	0	0	0.645	0	0.1	0	1	0	nd	1982	14.5	MTL	midpoint	1.19834	1.19834	-0.0444065
814	T-2566	Thomsen 1982	2	Vistevika; Store Stokkavann	58.9154	5.68	1	15500	300	0	15500	300	18612.8	885.25	401.75	silt	1	corr	bulk sediment	silty gyttja	nd	negative	n/a	n/a	n/a	nd	nd	nd	nd	0	0.1	0	0	0	0	0.61	0	0.1	0	1	0	nd	1982	11	MTL	midpoint	1.17987	1.17987	-0.173258
815	T-2567A	Thomsen 1982	2	Vistevika; Store Stokkavann	58.9154	5.68	1	9150	190	0	9150	190	10449.2	620.75	819.25	silty gyttja	1	corr	bulk gyttja	gyttja	silt	negative	n/a	n/a	n/a	nd	nd	nd	nd	0	0.1	0	0	0	0	0.610165	0	0.1	0	1	0	nd	1982	11	MTL	midpoint	1.17996	1.17996	-0.173231
816	T-3269	Rasmussen 1981	2	Svartisen; Glomfjord; Inndyr	67.04	14.0244	1	4390	80	440	4390	80	4973.25	312.75	133.25	marine sand	2	corr	Ostrea edulis	nd	nd	negative	nd	nd	nd	nd	nd	nd	nd	nd	0.1	0	0	0	0	0.7	0	0.1	0	1	0	nd	1981	20	MTL	midpoint	1.22882	1.22882	-0.173467
817	T-2671	Rasmussen 1981	2	Svartisen; Glomfjord; Saetvik	66.8082	13.968	1	7340	110	440	7340	110	7624	259	228	marine sand	2	corr	arctica islandica	nd	nd	negative	nd	nd	nd	nd	nd	nd	nd	nd	0.1	0	0	0	0	0.5	0	0.1	0	1	0	nd	1981	5	MTL	midpoint	1.12694	1.12694	-0.0666097
818	T-2373	Rasmussen 1981	2	Svartisen; Glomfjord; Saetvik	66.8082	13.968	1	9240	120	440	9240	120	9818.5	353.5	304.5	resedimented silt	2	corr	littorina littorea Buccinum undatum gibbula cenerarea	nd	nd	negative	nd	nd	nd	nd	nd	nd	nd	nd	0.1	0	0	0	0	0.9	0	0.1	0	1	0	nd	1981	40	MTL	midpoint	1.35277	1.35277	-0.173407
819	T-3079	Rasmussen 1981	2	Svartisen; Glomfjord; Furumo	66.8023	13.5514	1	10640	70	440	10640	70	11789	302	316	diamicton	2	corr	mya truncata	nd	nd	negative	nd	nd	nd	nd	nd	nd	nd	nd	0.1	0	0	0	0	0.6	0	0.1	0	1	0	nd	1981	10	MTL	midpoint	1.17473	1.17473	-0.173656
820	T-2374	Rasmussen 1981	2	Svartisen; Glomfjord; Saetvik	66.8106	13.894	1	10860	150	440	10860	150	12134.5	440.5	470.5	glacial silt	2	corr	chlamis islandica hiatella arctica	nd	nd	negative	nd	nd	nd	nd	nd	nd	nd	nd	0.1	0	0	0	0	0.5	0	0.1	0	1	0	nd	1981	3	MTL	midpoint	1.12694	1.12694	-0.173242
821	T-2372	Rasmussen 1981	2	Svartisen; Glomfjord; Sanda	66.8487	13.7499	1	11050	120	440	11050	120	12429	249	430	glacial clay	2	corr	astarte elliptica mya truncata macoma calcarea	nd	nd	negative	nd	nd	nd	nd	nd	nd	nd	nd	0.1	0	0	0	0	0.6	0	0.1	0	1	0	nd	1981	10	MTL	midpoint	1.17473	1.17473	-0.173535
822	T-2672	Rasmussen 1981	2	Svartisen; Glomfjord; Naeverdal	66.841	13.7656	1	11610	140	440	11610	140	12934	298	269	glacial clay	2	corr	mya truncata	nd	nd	negative	nd	nd	nd	nd	nd	nd	nd	nd	0.1	0	0	0	0	0.5	0	0.1	0	1	0	nd	1981	4	MTL	midpoint	1.12694	1.12694	-0.173353
823	T-3080	Rasmussen 1981	2	Svartisen; Glomfjord; Engavagen	66.7819	13.5297	1	11720	200	440	11720	200	13030.5	435.5	365.5	glacial clay	2	corr	macoma calcarea	nd	nd	negative	nd	nd	nd	nd	nd	nd	nd	nd	0.1	0	0	0	0	0.5	0	0.1	0	1	0	nd	1981	4	MTL	midpoint	1.12694	1.12694	-0.173462
824	T-2669	Rasmussen 1981	2	Svartisen; Glomfjord; Bratsberg	66.936	13.9001	1	11740	100	440	11740	100	13065.5	233.5	256.5	glacial clay	2	corr	macoma calcarea	nd	nd	negative	nd	nd	nd	nd	nd	nd	nd	nd	0.1	0	0	0	0	0.75	0	0.1	0	1	0	nd	1981	25	MTL	midpoint	1.25797	1.25797	-0.173271
825	T-1968	Stabell 1980	2	Telemark; Langvann bog	58.95	9.27	1	9040	210	0	9040	210	9594.5	602.5	594.5	fine detrital gyttja	1	corr	bulk gyttja	fine detrital gyttja	clay	negative	9.1	n/a	n/a	nd	nd	nd	nd	0	0.1	0	0	0	0	0.994779	0	0.1	0	1	0	nd	1980	99	MTL	midpoint	1.4176	1.4176	-0.174082
826	T-2415	Stabell 1980	2	Telemark; Kolbjornsmyr	58.8	9.28	1	9180	340	0	9180	340	10114.6	1162.38	643.625	clay with molluscs	1	corr	bulk clay	fine detrital gyttja	nd	negative	6.9	n/a	n/a	nd	nd	nd	nd	0	0.1	0	0	0	0	0.910002	0	0.1	0	1	0	nd	1980	82	MTL	midpoint	1.35945	1.35945	-0.174098
827	T-1967	Stabell 1980	2	Telemark; Poddetjonn	58.82	9.23	1	8820	300	0	8820	300	9775.5	927.5	742.5	fine detrital gytttja with sand	1	corr	bulk gyttja	fine detrital gyttja	sand	negative	6.6	n/a	n/a	nd	nd	nd	nd	0	0.1	0	0	0	0	0.752503	0	0.1	0	1	0	nd	1980	50.5	MTL	midpoint	1.25947	1.25947	-0.174081
828	T-1966	Stabell 1980	2	Telemark; Storkjenn	58.83	9.43	1	8500	180	0	8500	180	9501	648	491	layers of gyttja and clay	1	corr	bulk gyttja	fine detrital gyttja	clay	negative	5.65	n/a	n/a	nd	nd	nd	nd	0	0.1	0	0	0	0	0.930004	0	0.1	0	1	0	nd	1980	43	MTL	midpoint	1.37292	1.37292	-0.174079
829	T-1965	Stabell 1980	2	Telemark; lille neslandskjenn	58.95	9.28	1	7720	200	0	7720	200	8599	521	570	Gyttja with narrow layers of clay	1	corr	bulk gyttja	fine detrital gyttja	clay	negative	6.22	n/a	n/a	nd	nd	nd	nd	0	0.1	0	0	0	0	0.880001	0	0.1	0	1	0	nd	1980	38	MTL	midpoint	1.33955	1.33955	-0.618593
830	T-1964	Stabell 1980	2	Telemark; Tyvann	58.9	9.32	1	6270	130	0	6270	130	7196	283	446	Dark clay-gyttja	1	corr	bulk gyttja	fine detrital gyttja	clay	negative	4.01	n/a	n/a	nd	nd	nd	nd	0	0.1	0	0	0	0	0.786004	0	0.1	0	1	0	nd	1980	28.6	MTL	midpoint	1.27977	1.27977	-0.618593
831	T-1853	Stabell 1980	2	Telemark; Ovre Dyvvikvann	58.92	9.45	1	5860	290	0	5860	290	6542.5	874.5	541.5	clay-gyttja	1	corr	bulk gyttja	fine detrital gyttja	clay	negative	4.33	n/a	n/a	nd	nd	nd	nd	0	0.1	0	0	0	0	0.775004	0	0.1	0	1	0	nd	1980	27.5	MTL	midpoint	1.27304	1.27304	-0.618544
832	T-1852	Stabell 1980	2	Telemark; Bog north of oisang	58.77	9.27	1	4340	180	0	4340	180	5005.38	559.625	594.375	clay gyttja	1	corr	bulk gyttja	fine detrital gyttja	clay	negative	2.75	n/a	n/a	nd	nd	nd	nd	0	0.1	0	0	0	0	0.685005	0	0.1	0	1	0	nd	1980	18.5	MTL	midpoint	1.22034	1.22034	-0.618547
833	T-1851	Stabell 1980	2	Telemark; Baero	58.87	9.45	1	3070	170	0	3070	170	3227	467	457	clay with gyttja	1	corr	bulk gyttja	fine detrital gyttja	clay	negative	3.38	n/a	n/a	nd	nd	nd	nd	0	0.1	0	0	0	0	0.649003	0	0.1	0	1	0	nd	1980	14.9	MTL	midpoint	1.2005	1.2005	-0.595915
834	T-2414	Stabell 1980	2	Telemark; Nygardskjenna	58.78	9.35	1	3830	280	0	3830	280	4213.17	824.833	763.167	gyttja and clay	1	corr	bulk gyttja	fine detrital gyttja	clay	negative	2.24	n/a	n/a	nd	nd	nd	nd	0	0.1	0	0	0	0	0.650004	0	0.1	0	1	0	nd	1980	15	MTL	midpoint	1.20104	1.20104	-0.595915
835	T-1963	Stabell 1980	2	Telemark; Karlstadkjenna	58.87	9.38	1	2750	240	0	2750	240	2938	544	780	Brown clay-gyttja	1	corr	bulk gyttja	Black gyttja	brown clay-gyttja	negative	4.67	n/a	n/a	nd	nd	nd	nd	0	0.1	0	0	0	0	0.605004	0	0.1	0	1	0	nd	1980	10.5	MTL	midpoint	1.1773	1.1773	-0.189433
836	T-1850	Stabell 1980	2	Telemark; Svartkjenn	58.83	9.28	1	2630	180	0	2630	180	2651.83	668.167	494.833	Black gyttja with small clay content	1	corr	bulk gyttja	fine detrital gyttja	clay	negative	3.65	n/a	n/a	nd	nd	nd	nd	0	0.1	0	0	0	0	0.5	0	0.1	0	1	0	nd	1980	8.4	MTL	midpoint	1.12694	1.12694	-0.189433
837	T-1732	Stabell 1980	2	Telemark; Stamland	59.08	9.75	1	8000	270	0	8000	270	8999.83	535.167	782.833	clay-gyttja	1	corr	bulk gyttja	Gyttja	clay	negative	5.94	n/a	n/a	nd	nd	nd	nd	0	0.1	0	0	0	0	0.970005	0	0.1	0	1	0	nd	1980	47	MTL	midpoint	1.40032	1.40032	-0.189433
838	T-1849	Stabell 1980	2	Telemark; Halvarp	59.07	9.8	1	5900	240	0	5900	240	6717.83	693.167	518.833	clay-gyttja	1	corr	bulk gyttja	Gyttja	clay	negative	3.91	n/a	n/a	nd	nd	nd	nd	0	0.1	0	0	0	0	0.819004	0	0.1	0	1	0	nd	1980	31.9	MTL	midpoint	1.3003	1.3003	-0.189322
839	T-1740	Stabell 1980	2	Telemark; Storemyr	59.18	9.67	1	3750	150	0	3750	150	4108.5	676.5	517.5	clay-gyttja	1	corr	bulk gyttja	Gyttja	clay	negative	3.75	n/a	n/a	nd	nd	nd	nd	0	0.1	0	0	0	0	0.695005	0	0.1	0	1	0	nd	1980	19.5	MTL	midpoint	1.22598	1.22598	-0.189452
840	T-2121	Stabell 1980	2	Telemark; Vallemyr	59.12	9.68	1	2360	110	0	2360	110	2415.8	335.2	408.8	Brown clay-gyttja	1	corr	bulk gyttja	fine detrital gyttja	clay	negative	2.57	n/a	n/a	nd	nd	nd	nd	0	0.1	0	0	0	0	0.5	0	0.1	0	1	0	nd	1980	7.2	MTL	midpoint	1.12694	1.12694	-0.189452
841	Lu-1580a	Hakannson 1980	2	Sotra; storavatn	60.2367	5.18	1	7330	75	0	7330	75	8108	272	172	lacustrine gyttja	1	corr	not reported; assumed bulk sediment	lacustrine gyttja	lacustrine gyttja	positive	n/a	n/a	n/a	nd	nd	nd	nd	0	0.1	0	0	0	0	0.630238	0	0.1	0	1	0	nd	1980	13	MTL	midpoint	1.19046	1.19046	-0.189452
842	Lu-1581a	Hakannson 1980 (as in Lohne et al 2007)	2	Sotra; storavatn	60.2367	5.18	1	9420	85	0	9420	85	10811.8	324.25	520.75	lacustrine gyttja	1	corr	not reported; assumed bulk sediment	lacustrine gyttja	marine gyttja	negative	n/a	n/a	n/a	nd	nd	nd	nd	0	0.1	0	0	0	0	0.630238	0	0.1	0	1	0	nd	1980	13	MTL	midpoint	1.19046	1.19046	-0.189401
843	Lu-1582a	Hakansson (1980)	2	Sotra; Austretjonn	60.2417	5.17	1	2860	110	0	2860	110	3068	307	340	lacustrine gyttja	1	corr	not reported; assumed bulk sediment	lacustrine gyttja	marine gyttja	negative	n/a	n/a	n/a	nd	nd	nd	nd	0	0.1	0	0	0	0	0.5	0	0.1	0	1	0	nd	1980	5.7	MTL	midpoint	1.12694	1.12694	-0.189451
844	Lu-1583a	Hakansson (1980)	2	Sotra; Vestretjonn	60.24	5.17	1	3600	110	0	3600	110	3872	512	379	lacustrine gyttja	1	corr	not reported; assumed bulk sediment	lacustrine gyttja	marine gyttja	negative	n/a	n/a	n/a	nd	nd	nd	nd	0	0.1	0	0	0	0	0.5	0	0.1	0	1	0	nd	1980	7.3	MTL	midpoint	1.12694	1.12694	-0.189452
845	T-2884a	Stabell & Krzywinski (1979)	2	Sotra; Skittjonn	60.24	5.03	1	4410	100	0	4410	100	5136	325	518	nd	1	corr	not reported; assumed bulk sediment	lacustrine gyttja	nd	negative	n/a	n/a	n/a	nd	nd	nd	nd	0	0.1	0	0	0	0	0.5	0	0.1	0	1	0	nd	1979	8.5	MTL	midpoint	1.12694	1.12694	-0.189451
846	T-2886a	Stabell & Krzywinski 1979 (as in Lohne et al 2007)	2	Sotra; Skittjonn	60.24	5.03	1	9190	140	0	9190	140	10370.5	696.5	584.5	nd	1	corr	not reported; assumed bulk sediment	lacustrine gyttja	nd	negative	n/a	n/a	n/a	nd	nd	nd	nd	0	0.1	0	0	0	0	0.5	0	0.1	0	1	0	nd	1979	8.5	MTL	midpoint	1.12694	1.12694	-0.189451
847	T-1529	Sorenson 1979 (as in Nydal et al. 1985)	2	Akershus; oslofjord	59.7	10.6333	1	3440	110	0	3440	110	3741.5	395.5	371.5	nd	1	corr	peat and gyttja	nd	nd	negative	3.4	n/a	n/a	nd	nd	nd	nd	0	0.1	0	0	0	0	0.740038	0	0.1	0	1	0	nd	1973	24	MTL	midpoint	1.25206	1.25206	-0.189451
848	T-1624I	Sorenson 1979 (as in Nydal et al. 1985)	2	Akershus; verpen lake	59.7	10.6333	1	6490	360	0	6490	360	7375.33	646.667	875.333	nd	1	corr	gyttja	nd	nd	negative	2.3	n/a	n/a	nd	nd	nd	nd	0	0.1	0	0	0	0	0.750019	0	0.1	0	1	0	nd	1973	50	MTL	midpoint	1.25799	1.25799	-0.186001
849	T-1624II	Sorenson 1979 (as in Nydal et al. 1985)	2	Akershus; verpen lake	59.7	10.6333	1	6190	240	0	6190	240	7077.5	483.5	575.5	nd	0	corr	wood	nd	nd	negative	2.3	n/a	n/a	nd	nd	nd	nd	0	0.1	0	0	0	0	0.750019	0	0.1	0	1	0	nd	1973	50	MTL	midpoint	1.25799	1.25799	-0.595851
850	T-1838	Sorenson 1979 (as in Nydal et al. 1985)	2	Akershus; verpen lake	59.6667	10.55	1	5580	140	0	5580	140	6305.75	437.25	359.75	clay gyttja	1	corr	bulk gyttja	nd	nd	negative	5.225	n/a	n/a	nd	nd	nd	nd	0	0.1	0	0	0	0	0.920039	0	0.1	0	1	0	nd	1973	42	MTL	midpoint	1.36619	1.36619	-0.68222
851	T-604	Sorenson 1979 (as in Nydal et al. 1985)	2	Akershus; As gultveldt	59.65	10.7167	1	8100	120	0	8100	120	9012.67	391.333	375.667	nd	0	corr	pinus cones	nd	nd	negative	1.2	n/a	n/a	nd	nd	nd	nd	0	0.1	0	0	0	0	0.850019	0	0.1	0	1	0	nd	1973	70	MTL	midpoint	1.32005	1.32005	-0.596395
852	T-1837	Sorenson 1979 (as in Nydal et al. 1985)	2	Akershus; As gultveldt	59.65	10.7167	1	8760	290	0	8760	290	9969.25	609.75	943.25	clay gyttja	1	corr	bulk gyttja	nd	nd	negative	1.4	n/a	n/a	nd	nd	nd	nd	0	0.1	0	0	0	0	0.85	0	0.1	0	1	0	nd	1973	70	MTL	midpoint	1.32004	1.32004	-0.602577
853	T-1528	Sorenson 1979 (as in Nydal et al. 1985)	2	Akershus; Kirkenrudtjernet	59.7167	10.7667	1	9170	310	0	9170	310	10113	1080	570	clay gyttja	1	corr	bulk gyttja	nd	nd	negative	7.45	n/a	n/a	nd	nd	nd	nd	0	0.1	0	0	0	0	1.10002	0	0.1	0	1	0	nd	1973	120	MTL	midpoint	1.49333	1.49333	-0.602577
854	T-2749	Sorenson 1979 (as in Nydal et al. 1985)	2	Akershus; frogn haoya	59.6833	10.6	1	9590	70	440	9590	70	10968.1	207.875	252.125	nd	2	corr	mya truncata	nd	nd	negative	2	n/a	n/a	nd	nd	nd	nd	0	0.1	0	0	0	0	1.17502	0	0.1	0	1	0	nd	1973	135	MTL	midpoint	1.54941	1.54941	-0.595915
855	T-1527	Sorenson 1979 (as in Nydal et al. 1985)	2	Akershus; krakstad grytland	59.6833	10.85	1	9290	130	440	9290	130	9663	465	320	nd	2	corr	arctica islandica	nd	nd	negative	1.5	n/a	n/a	nd	nd	nd	nd	0	0.1	0	0	0	0	1.18482	0	0.1	0	1	0	nd	1973	140	MTL	midpoint	1.55686	1.55686	-0.706695
856	T-607	Sorenson 1979 (as in Nydal et al. 1985)	2	Akershus; nordbyhogda	59.7167	10.7667	1	9530	180	0	9530	180	10008.5	503.5	519.5	nd	3	corr	balanus sp	nd	nd	negative	4	n/a	n/a	nd	nd	nd	nd	0	0.1	0	0	0	0	1.23482	0	0.1	0	1	0	nd	1973	150	MTL	midpoint	1.59524	1.59524	-0.68222
857	T-1747	Sorenson 1979 (as in Nydal et al. 1985)	2	Akershus; Ski haugland	59.7333	10.8167	1	9440	140	440	9440	140	9885.5	387.5	418.5	nd	2	corr	arctica islandica	nd	nd	negative	0.2	n/a	n/a	nd	nd	nd	nd	0	0.1	0	0	0	0	1.29482	0	0.1	0	1	0	nd	1973	162	MTL	midpoint	1.64212	1.64212	-0.598429
858	T-1727	Sorenson 1979 (as in Nydal et al. 1985)	2	Akershus; enebakk Myren	59.75	11	1	10570	250	0	10570	250	11453	871	797	clay gyttja	1	corr	bulk gyttja	nd	nd	negative	4	n/a	n/a	nd	nd	nd	nd	0	0.1	0	0	0	0	1.335	0	0.1	0	1	0	nd	1973	167	MTL	midpoint	1.67398	1.67398	-0.602577
859	T-1623	Sorenson 1979 (as in Nydal et al. 1985)	2	Akershus; langskaudtjern enebakk	59.7667	10.9833	1	10490	190	0	10490	190	12311.8	519.25	898.75	clay gyttja	1	corr	bulk gyttja	nd	nd	negative	14.5	n/a	n/a	nd	nd	nd	nd	0	0.1	0	0	0	0	1.46	0	0.1	0	1	0	nd	1973	192	MTL	midpoint	1.77527	1.77527	-0.596395
860	T-1726	Sorenson 1979 (as in Nydal et al. 1985)	2	Akershus; kollasen ski	59.75	10.95	1	9520	150	0	9520	150	10886	355	588	clay gyttja	1	corr	bulk gyttja	nd	nd	negative	4.75	n/a	n/a	nd	nd	nd	nd	0	0.1	0	0	0	0	1.47502	0	0.1	0	1	0	nd	1973	195	MTL	midpoint	1.78765	1.78765	-0.705464
861	T-89B	Henningsmoen 1978	2	Vestfold; Tjolling Holtantjern	59.2833	10.4667	1	2400	150	0	2400	150	2558.9	293.1	564.9	bog gyttja	1	corr	gyttja	gyttja	marine sediments	negative	3.08	nd	nd	nd	nd	nd	nd	0	0.1	0	0	0	0	0.615031	0	0.1	0	1	0	nd	1958	11.5	MTL	midpoint	1.18248	1.18248	-0.603493
862	Lu-1353a	Stabell & Krzywinski 1978 (as in Lohne et al 2007)	2	Sotra; Lommatjonn	60.2483	5.03667	1	9290	95	0	9290	95	10376.8	691.167	183.833	lacustrine gyttja	1	corr	not reported; assumed bulk sediment	lacustrine gyttja	marine sediments	negative	n/a	n/a	n/a	nd	nd	nd	nd	0	0.1	0	0	0	0	0.614174	0	0.1	0	1	0	nd	1978	11.4	MTL	midpoint	1.18204	1.18204	-0.724267
863	Lu-1498a	Stabell & Krzywinski 1978 (as in Lohne et al 2007)	2	Sotra; Einerhaugtjonn	60.3533	4.99	1	9460	90	0	9460	90	10893.6	285.375	584.625	lacustrine gyttja	1	corr	not reported; assumed bulk sediment	lacustrine gyttja	marine sediments	negative	n/a	n/a	n/a	nd	nd	nd	nd	0	0.1	0	0	0	0	0.5	0	0.1	0	1	0	nd	1978	9.2	MTL	midpoint	1.12694	1.12694	-0.473151
864	Lu-1357a	Stabell & Krzywinski 1978 (as in Lohne et al 2007)	2	Sotra; klokkarvatnet	60.2483	5.03	1	9150	100	0	9150	100	10400.8	296.25	498.75	lacustrine gyttja	1	corr	not reported; assumed bulk sediment	lacustrine gyttja	marine sediments	negative	n/a	n/a	n/a	nd	nd	nd	nd	0	0.1	0	0	0	0	0.5	0	0.1	0	1	0	nd	1978	6.9	MTL	midpoint	1.12694	1.12694	-0.473151
865	Lu-1361a	Stabell & Krzywinski 1978 (as in Lohne et al 2007)	2	Sotra; Kaldavatn	60.2633	4.98	1	9340	180	0	9340	180	10398.3	805.667	432.333	lacustrine gyttja	1	corr	not reported; assumed bulk sediment	lacustrine gyttja	marine sediments	negative	n/a	n/a	n/a	nd	nd	nd	nd	0	0.1	0	0	0	0	0.5	0	0.1	0	1	0	nd	1978	7.6	MTL	midpoint	1.12694	1.12694	-0.473151
866	Lu-1360a	Stabell & Krzywinski 1978 (as in Lohne et al 2007)	2	Sotra; Kaldavatn	60.2633	4.98	1	8060	170	0	8060	170	8904.33	548.667	439.333	lacustrine gyttja	1	corr	not reported; assumed bulk sediment	marine sediments	lacustrine gyttja	positive	n/a	n/a	n/a	nd	nd	nd	nd	0	0.1	0	0	0	0	0.5	0	0.1	0	1	0	nd	1978	7.6	MTL	midpoint	1.12694	1.12694	-0.424203
867	T-2887a	Stabell & Krzywinski 1979 (as in Lohne et al 2007)	2	Sotra; Skittjonn	60.24	5.03	1	7950	220	0	7950	220	8799	649	452	lacustrine gyttja	1	corr	not reported; assumed bulk sediment	marine sediments	lacustrine gyttja	positive	n/a	n/a	n/a	nd	nd	nd	nd	0	0.1	0	0	0	0	0.5	0	0.1	0	1	0	nd	1978	8.5	MTL	midpoint	1.12694	1.12694	-0.424203
868	Lu-1553a	Stabell & Krzywinski 1978 (as in Lohne et al 2007)	2	Sotra; Torkevikstjonn	60.3883	4.98	1	6050	140	0	6050	140	6931.17	374.833	437.167	lacustrine gyttja	1	corr	not reported; assumed bulk sediment	lacustrine gyttja	marine sediments	negative	n/a	n/a	n/a	nd	nd	nd	nd	0	0.1	0	0	0	0	0.618222	0	0.1	0	1	0	nd	1978	11.8	MTL	midpoint	1.18414	1.18414	-0.424203
869	Lu-1496a	Stabell & Krzywinski 1978 (as in Lohne et al 2007)	2	Sotra; Einerhaugtjonn	60.3533	4.99	1	4880	130	0	4880	130	5574.75	421.25	502.75	lacustrine gyttja	1	corr	not reported; assumed bulk sediment	lacustrine gyttja	marine sediments	negative	n/a	n/a	n/a	nd	nd	nd	nd	0	0.1	0	0	0	0	0.5	0	0.1	0	1	0	nd	1978	9.2	MTL	midpoint	1.12694	1.12694	-0.99299
870	Lu-1358a	Stabell & Krzywinski 1978 (as in Lohne et al 2007)	2	Sotra; Midtjonn	60.2433	5	1	4260	120	0	4260	120	4784	507	361	lacustrine gyttja	1	corr	not reported; assumed bulk sediment	lacustrine gyttja	marine sediments	negative	n/a	n/a	n/a	nd	nd	nd	nd	0	0.1	0	0	0	0	0.5	0	0.1	0	1	0	nd	1978	7.9	MTL	midpoint	1.12694	1.12694	-0.99299
871	Lu-1359a	Stabell & Krzywinski 1978 (as in Lohne et al 2007)	2	Sotra; Kaldavatn	60.2633	4.98	1	4340	120	0	4340	120	5130.62	309.375	683.625	lacustrine gyttja	1	corr	not reported; assumed bulk sediment	lacustrine gyttja	marine sediments	negative	n/a	n/a	n/a	nd	nd	nd	nd	0	0.1	0	0	0	0	0.5	0	0.1	0	1	0	nd	1978	7.6	MTL	midpoint	1.12694	1.12694	-0.405868
872	Lu-1356a	Stabell & Krzywinski 1978 (as in Lohne et al 2007)	2	Sotra; Klokkarvatnet	60.2483	5.03	1	3990	120	0	3990	120	4519.5	329.5	529.5	lacustrine gyttja	1	corr	not reported; assumed bulk sediment	lacustrine gyttja	marine sediments	negative	n/a	n/a	n/a	nd	nd	nd	nd	0	0.1	0	0	0	0	0.5	0	0.1	0	1	0	nd	1978	6.9	MTL	midpoint	1.12694	1.12694	-0.405868
873	Lu-1495a	Stabell & Krzywinski 1978 (as in Lohne et al 2007)	2	Sotra; Bakketjonn	60.3783	4.98	1	2790	110	0	2790	110	2884.5	463.5	385.5	lacustrine gyttja	1	corr	not reported; assumed bulk sediment	lacustrine gyttja	marine sediments	negative	n/a	n/a	n/a	nd	nd	nd	nd	0	0.1	0	0	0	0	0.5	0	0.1	0	1	0	nd	1978	5.3	MTL	midpoint	1.12694	1.12694	-0.432307
874	Lu-1528a	Stabell & Krzywinski 1978 (as in Lohne et al 2007)	2	Sotra; Skrubbisvatn	60.2617	4.97	1	2490	110	0	2490	110	2539	337	387	lacustrine gyttja	1	corr	not reported; assumed bulk sediment	lacustrine gyttja	marine sediments	negative	n/a	n/a	n/a	nd	nd	nd	nd	0	0.1	0	0	0	0	0.5	0	0.1	0	1	0	nd	1978	3.5	MTL	midpoint	1.12694	1.12694	-0.436837
875	Lu-1527a	Stabell & Krzywinski 1978 (as in Lohne et al 2007)	2	Sotra; Angelveitvatnet	60.4067	4.99	1	2240	110	0	2240	110	2151	555	262	lacustrine gyttja	1	corr	not reported; assumed bulk sediment	lacustrine gyttja	marine sediments	negative	n/a	n/a	n/a	nd	nd	nd	nd	0	0.1	0	0	0	0	0.5	0	0.1	0	1	0	nd	1978	3.6	MTL	midpoint	1.12694	1.12694	-0.693593
876	T-663	Anundsen 1978	2	Haugsund; Rygjaheim	59.4842	5.73	1	9900	220	0	9900	220	11607.8	840.167	1005.83	brown detrital gyttja	1	corr	bulk gyttja	sandy silt	sandy clayey silt	negative	3.9	nd	nd	nd	nd	nd	nd	0	0.1	0	0	0	0	0.770149	0	0.1	0	1	0	nd	1978	54	MTL	midpoint	1.27009	1.27009	-0.693593
877	T-996	Anundsen 1978	2	Haugsund; Rygjaheim	59.4842	5.73	1	8040	290	0	8040	290	8894.17	657.833	701.167	sandy silt	1	corr	not reported; assumed bulk sediment	silt and gyttja	brown detrital gyttja	negative	3.8	nd	nd	nd	nd	nd	nd	0	0.1	0	0	0	0	0.767932	0	0.1	0	1	0	nd	1978	54	MTL	midpoint	1.26875	1.26875	-0.693593
878	T-995	Anundsen 1978	2	Haugsund; Rygjaheim	59.4842	5.73	1	10220	160	0	10220	160	12112.1	488.917	835.083	sandy clayey silt	1	corr	not reported; assumed bulk sediment	silt and gyttja	brown detrital gyttja	negative	3.8	nd	nd	nd	nd	nd	nd	0	0.1	0	0	0	0	0.77	0	0.1	0	1	0	nd	1978	54	MTL	midpoint	1.27	1.27	-0.330241
879	T-993	Gulliksen et al. 1978 (also in Anundsen 1978 and Anundsen and Fjeldsjaar 1983)	2	Rogaland; tysvaer yrkje	59.3921	5.65	1	11530	140	0	11530	140	13483.2	267.75	371.25	gyttja-rich silty clay	1	corr	bulky gyttja	silty clay	silt	positive	7.4	nd	nd	nd	nd	nd	nd	0	0.1	0	0	0	0	0.876204	0	0.1	0	1	0	nd	1978	38	MTL	midpoint	1.33706	1.33706	-0.658112
880	T-1040	Gulliksen et al. 1978 (also in Anundsen 1978)	2	Rogaland; tysvaer yrkje	59.3921	5.65	1	10540	170	0	10540	170	12354	485	605	silty clay	1	corr	organic substances	silty clay	gyttja-rich silty clay	positive	7.3	nd	nd	nd	nd	nd	nd	0	0.1	0	0	0	0	0.880223	0	0.1	0	1	0	nd	1978	38	MTL	midpoint	1.3397	1.3397	-0.658112
881	T-994	Gulliksen et al. 1978 (also in Anundsen 1978)	2	Rogaland; tysvaer yrkje	59.3921	5.65	1	9580	120	0	9580	120	10940.8	324.167	508.833	silty clay	1	corr	organic substances	silty clay	gyttja-rich silty clay	negative	6.69	nd	nd	nd	nd	nd	nd	0	0.1	0	0	0	0	0.876204	0	0.1	0	1	0	nd	1978	38	MTL	midpoint	1.33706	1.33706	-0.449529
882	T-1888	Vorren 1978	2	Andoya; Endlevatn	69.2332	16.0598	1	10510	510	0	10510	510	12290	1106	1544	gyttja	1	corr	bulk gyttja	lacustrine gyttja	lacustrine gyttja	negative	6.5	5.5	nd	nd	nd	nd	nd	0	0.1	0	0	0	0	0.840357	0	0.1	0	1	0	nd	1978	35	MTL	midpoint	1.31385	1.31385	-0.449529
883	T-1887	Vorren 1978	2	Andoya; Endlevatn	69.2332	16.0598	1	12920	110	0	12920	110	15445.5	432.5	428.5	silty gyttja	1	corr	bulk gyttja	silty gyttja	faintly laminated silt	negative	7.5	4.5	nd	nd	nd	nd	nd	0	0.1	0	0	0	0	0.840357	0	0.1	0	1	0	nd	1978	35	MTL	midpoint	1.31385	1.31385	-0.562402
884	T-1621	Gulliksen et al. 1978	2	Rogaland; Tysvaer Borgoy	59.3333	5.63333	1	12830	150	0	12830	150	15331	476	672	clay	3	corr	Balaena musticetus right whale bone	moraine deposit	moraine deposit	negative	2	nd	nd	nd	nd	nd	nd	0	0.1	0	0	0	0	0.75	0	0.1	0	1	0	nd	1977	25	MTL	midpoint	1.25797	1.25797	-0.562081
885	T-2005	Gulliksen et al. 1978	2	Rogaland; Tysvaer Borgoy	59.3333	5.63333	1	4340	110	0	4340	110	4079.5	427.5	426.5	littoral sand and gravel	1	corr	gyttja	gyttja	gravel	negative	0.7	nd	nd	nd	nd	nd	nd	0	0.1	0	0	0	0	0.736329	0	0.1	0	1	0	nd	1977	24	MTL	midpoint	1.24987	1.24987	-0.561734
886	T-1883	Gulliksen et al. 1978	2	Rogaland; Tysvaer hinderavag	59.3333	5.78333	1	12420	100	0	12420	100	14660.5	335.5	525.5	marine clay	3	corr	balaena mysticetus right whale bones	littoral sand and gravel	marine clay	negative	2	nd	nd	nd	nd	nd	nd	0	0.1	0	0	0	0	0.7	0	0.1	0	1	0	nd	1950	20	MTL	midpoint	1.22882	1.22882	-0.561734
887	T-1620	Gulliksen et al. 1978	2	Rogaland; Tysvaer nedstrand	59.3333	5.86667	1	11630	100	440	11630	100	12803	259	191	marine clay	2	corr	balanus balanoides mya truncata chlamys islandicus	silt and clay	marine clay	negative	1	nd	nd	nd	nd	nd	nd	0	0.1	0	0	0	0	0.6	0	0.1	0	1	0	nd	1968	10	MTL	midpoint	1.17473	1.17473	-0.563009
888	T-1696	Gulliksen et al. 1978	2	Hordaland; oygarden blomvag cemetary	60.5333	5.55	1	12980	180	440	12980	180	14149	472	692	shell-bearing	2	corr	modiolus modiolus	littoral sediments	till	negative	3	nd	nd	nd	nd	nd	nd	0	0.1	0	0	0	0	2	0	0.1	0	1	0	nd	1942	20	MTL	midpoint	2.24054	2.24054	-0.563009
889	T-1882	Gulliksen et al. 1978	2	Hordaland; oygarden blomvag cemetary	60.5333	5.55	1	12840	90	440	12840	90	14084	376	617	plant-bearing bed	2	corr	mytilus edulis	littoral sediments	till	negative	0.5	nd	nd	nd	nd	nd	nd	0	0.1	0	0	0	0	2	0	0.1	0	1	0	nd	1942	20	MTL	midpoint	2.24054	2.24054	-1.72652
890	T-1889	Gulliksen et al. 1978	2	Hordaland; oygarden blomvag cemetary	60.5333	5.55	1	12550	90	0	12550	90	13644.5	724.5	510.5	littoral sediments	3	corr	whale bones	littoral sediments	till	negative	0.5	nd	nd	nd	nd	nd	nd	0	0.1	0	0	0	0	2	0	0.1	0	1	0	nd	1942	20	MTL	midpoint	2.24054	2.24054	-1.59795
891	T-1371	Gulliksen et al. 1978	2	Hordaland; stord	59.8955	5.51468	1	10600	140	440	10600	140	11477	483	374	stoney clay	2	corr	mya truncata hiatella arctica	clay	bedrock	nd	0.5	0.5	nd	nd	nd	nd	nd	0	0.1	0	0	0	0	2	0	0.1	0	1	0	nd	1972	35	MTL	midpoint	2.24054	2.24054	-1.59795
892	T-1491	Gulliksen et al. 1978	2	Hordaland; arna haukedalsvatnet	60.3667	5.46667	1	8960	220	0	8960	220	9291	663	671	peat bog	1	corr	silty gyttja	gyttja	gyttja	negative	11.5	nd	nd	nd	nd	nd	nd	0	0.1	0	0	0	0	0.872	0	0.1	0	1	0	nd	1972	75	MTL	midpoint	1.33431	1.33431	-1.59795
893	T-1749	Gulliksen et al. 1978	2	Hordaland; arna haukedalsvatnet	60.3667	5.46667	1	7430	110	0	7430	110	8269	250	306	peat bog	1	corr	silty gyttja	gyttja	gyttja	negative	10.5	nd	nd	nd	nd	nd	nd	0	0.1	0	0	0	0	0.872	0	0.1	0	1	0	nd	1972	75	MTL	midpoint	1.33431	1.33431	-1.59795
894	T-1050	Gulliksen et al. 1978	2	Sogn. Og fjordane; Kroken	61.35	7.38333	1	10520	450	0	10520	450	12116.8	1196.25	1293.75	silt	1	corr	silt gyttja	fine detritus	nd	negative	6.03	nd	nd	nd	nd	nd	nd	0	0.1	0	0	0	0	1.12256	0	0.1	0	1	0	nd	1970	125	MTL	midpoint	1.51001	1.51001	-1.59795
895	T-1107	Gulliksen et al. 1978	2	Sogn. Og fjordane; Kroken	61.35	7.38333	1	9100	200	0	9100	200	10090	970	540	fine detritus	1	corr	fine detritus	fine detritus	silt	negative	5.86	nd	nd	nd	nd	nd	nd	0	0.1	0	0	0	0	1.12256	0	0.1	0	1	0	nd	1970	125	MTL	midpoint	1.51001	1.51001	-1.59795
896	T-1130	Gulliksen et al. 1978	2	Nord-trondelag; Logtunmyr	63.5667	10.7	1	4030	110	0	4030	110	4663.67	199.333	576.667	peat bog	1	corr	minerotrophic rich-fen peat	gyttja	nd	negative	1.57	nd	nd	nd	nd	nd	nd	0	0.1	0	0	0	0	0.770095	0	0.1	0	1	0	nd	1970	27	MTL	midpoint	1.27006	1.27006	-1.59795
897	T-1133	Gulliksen et al. 1978	2	Nord-trondelag; Lianvatn	63.6	10.7667	1	5950	100	0	5950	100	6781	378	329	brackish-water detrital gyttja	1	corr	bulk gyttja with hystrix	lacustrine gyttja	marine gyttja	negative	10.45	nd	nd	nd	nd	nd	nd	0	0.1	0	0	0	0	0.930132	0	0.1	0	1	0	nd	1970	43	MTL	midpoint	1.37301	1.37301	-1.59795
898	T-1177	Gulliksen et al. 1978	2	Nord-trondelag; Asklundvatn	63.5833	10.7167	1	6550	120	0	6550	120	7459	251	384	detrital gyttja	1	corr	bulk gyttja	lacustrine gyttja	lacustrine gyttja	negative	8.8	nd	nd	nd	nd	nd	nd	0	0.1	0	0	0	0	0.9398	0	0.1	0	1	0	nd	1970	88.5	MTL	midpoint	1.37957	1.37957	-1.59795
899	T-1134	Gulliksen et al. 1978	2	Nord-trondelag; Asklundvatn	63.5833	10.7167	1	8640	230	0	8640	230	9688	560	664	detrital gyttja	1	corr	bulk gyttja	lacustrine gyttja	nd	negative	9.15	nd	nd	nd	nd	nd	nd	0	0.1	0	0	0	0	0.942554	0	0.1	0	1	0	nd	1970	88.5	MTL	midpoint	1.38145	1.38145	-1.59795
900	T-1139	Gulliksen et al. 1978	2	Nord-trondelag; Brekkmyr	63.6	10.7833	1	7060	130	0	7060	130	7818.75	365.25	235.75	gyttja	1	corr	sphagnum fuscum peat	lacustrine gyttja	lacustrine gyttja	negative	5.8	nd	nd	nd	nd	nd	nd	0	0.1	0	0	0	0	1.33732	0	0.1	0	1	0	nd	1970	168	MTL	midpoint	1.67584	1.67584	-1.59795
901	T-1138	Gulliksen et al. 1978	2	Nord-trondelag; Brekkmyr	63.6	10.7833	1	8770	200	0	8770	200	9805	674	498	gyttja	1	corr	sphagnum carex peat	lacustrine gyttja	nd	negative	9.1	nd	nd	nd	nd	nd	nd	0	0.1	0	0	0	0	1.33732	0	0.1	0	1	0	nd	1970	168	MTL	midpoint	1.67584	1.67584	-1.59795
902	T-1881	Gulliksen et al. 1978	2	Troms; Strofjord nedrevatn	69.3667	20.3	1	9290	200	0	9290	200	10444.3	731.667	520.333	silty clay	3	corr	macoma calcarea, balanus sp	silt	resedimented marine deposits	negative	nd	nd	nd	nd	nd	nd	nd	0	0.1	0	0	0	0	0.916711	0	0.1	0	1	0	nd	1970	85	MTL	midpoint	1.36395	1.36395	-1.59795
903	T-2238	Helskog 1978 (also in Moller 1987)	2	Varangerfjord; Advik	70.0058	29.1949	1	3620	190	0	3620	190	3197	484	470	midden	0	corr	Birch and pine	nd	nd	negative	nd	nd	nd	nd	nd	nd	nd	0	0.1	0	0	0	0	0.617257	0	0.1	0	1	0	nd	1978	13.5	MTL	midpoint	1.18364	1.18364	-1.59795
904	T-2056	Helskog 1978 (also in Moller 1987)	2	Varangerfjord; Advik	70.0058	29.1949	1	3730	90	0	3730	90	4140.5	261.5	295.5	midden	2	corr	Marine shell	nd	nd	negative	nd	nd	nd	nd	nd	nd	nd	0	0.1	0	0	0	0	0.617257	0	0.1	0	1	0	nd	1978	13.5	MTL	midpoint	1.18364	1.18364	-1.59795
905	T-2058 B	Helskog 1978 (also in Moller 1987)	2	Varangerfjord; Advik	70.0058	29.1949	1	3630	80	0	3630	80	3181	252	274	midden	2	corr	Marine shell	nd	nd	negative	nd	nd	nd	nd	nd	nd	nd	0	0.1	0	0	0	0	0.615757	0	0.1	0	1	0	nd	1978	13.35	MTL	midpoint	1.18286	1.18286	-1.59795
906	T-2057	Helskog 1978 (also in Moller 1987)	2	Varangerfjord; Advik	70.0058	29.1949	1	4390	70	0	4390	70	4145	259	268	midden	2	corr	Marine shell	nd	nd	negative	nd	nd	nd	nd	nd	nd	nd	0	0.1	0	0	0	0	0.662257	0	0.1	0	1	0	nd	1978	18	MTL	midpoint	1.20772	1.20772	-1.59795
907	T-233	Helskog 1978 (also in Moller 1987)	2	Varangerfjord; Advik	70.0058	29.1949	1	3750	150	0	3750	150	3318.5	492.5	472.5	cultural layer	1	corr	unidentified charcoal	nd	nd	negative	nd	nd	nd	nd	nd	nd	nd	0	0.1	0	0	0	0	0.660257	0	0.1	0	1	0	nd	1978	17.8	MTL	midpoint	1.20662	1.20662	-1.59795
908	T-197	Helskog 1978 (also in Moller 1987)	2	Varangerfjord; Advik	70.0058	29.1949	1	4800	150	0	4800	150	5509.83	410.167	527.833	midden	1	corr	unidentified charcoal	nd	nd	negative	nd	nd	nd	nd	nd	nd	nd	0	0.1	0	0	0	0	0.686257	0	0.1	0	1	0	nd	1978	20.4	MTL	midpoint	1.22104	1.22104	-1.59795
909	T-1816	Helskog 1978 (also in Moller 1987)	2	Varangerfjord; Advik	70.0058	29.1949	1	4350	130	0	4350	130	5124.5	188.5	545.5	midden	0	corr	Pine	nd	nd	negative	nd	nd	nd	nd	nd	nd	nd	0	0.1	0	0	0	0	0.686257	0	0.1	0	1	0	nd	1978	20.4	MTL	midpoint	1.22104	1.22104	-1.59795
910	T-2165	Helskog 1978 (also in Moller 1987)	2	Varangerfjord; Advik	70.0058	29.1949	1	4150	100	0	4150	100	4705.38	167.625	291.375	midden	0	corr	Fishbone and reindeer antler	nd	nd	negative	nd	nd	nd	nd	nd	nd	nd	0	0.1	0	0	0	0	0.676257	0	0.1	0	1	0	nd	1978	19.4	MTL	midpoint	1.21545	1.21545	-1.59795
911	T-232	Helskog 1978 (also in Moller 1987)	2	Varangerfjord; Advik	70.0058	29.1949	1	6050	250	0	6050	250	7018	410	707	fireplace	1	corr	unidentified charcoal	nd	nd	negative	nd	nd	nd	nd	nd	nd	nd	0	0.1	0	0	0	0	0.676257	0	0.1	0	1	0	nd	1978	19.4	MTL	midpoint	1.21545	1.21545	-1.59795
912	T-2054	Helskog 1978 (also in Moller 1987)	2	Varangerfjord; Advik	70.0058	29.1949	1	4780	80	0	4780	80	5537.25	114.75	217.25	midden	2	corr	Marine shell	nd	nd	negative	nd	nd	nd	nd	nd	nd	nd	0	0.1	0	0	0	0	0.687257	0	0.1	0	1	0	nd	1978	20.5	MTL	midpoint	1.22161	1.22161	-1.59795
913	T-1817	Helskog 1978 (also in Moller 1987)	2	Varangerfjord; Gressbakken Nedre Vest	70.0058	29.1949	1	2490	80	0	2490	80	1780.5	261.5	256.5	floor area	0	corr	Alder	nd	nd	negative	nd	nd	nd	nd	nd	nd	nd	0	0.1	0	0	0	0	0.622257	0	0.1	0	1	0	nd	1978	14	MTL	midpoint	1.18626	1.18626	-1.59795
914	T-234	Helskog 1978 (also in Moller 1987)	2	Varangerfjord; Gressbakken Nedre Vest	70.0058	29.1949	1	3850	100	0	3850	100	4192.5	601.5	346.5	midden	1	corr	unidentified charcoal	nd	nd	negative	nd	nd	nd	nd	nd	nd	nd	0	0.1	0	0	0	0	0.622257	0	0.1	0	1	0	nd	1978	14	MTL	midpoint	1.18626	1.18626	-1.59795
915	T-198	Helskog 1978 (also in Moller 1987)	2	Varangerfjord; Gressbakken Nedre Vest	70.0058	29.1949	1	3650	150	0	3650	150	3885.75	618.25	395.75	cultural layer	1	corr	unidentified charcoal	nd	nd	negative	nd	nd	nd	nd	nd	nd	nd	0	0.1	0	0	0	0	0.628757	0	0.1	0	1	0	nd	1978	14.65	MTL	midpoint	1.18968	1.18968	-1.59795
916	T-1917	Helskog 1978 (also in Moller 1987)	2	Varangerfjord; Gressbakken Nedre Vest	70.0058	29.1949	1	4210	90	0	4210	90	4709.75	258.25	262.75	midden	2	corr	Marine shell	nd	nd	negative	nd	nd	nd	nd	nd	nd	nd	0	0.1	0	0	0	0	0.628757	0	0.1	0	1	0	nd	1978	14.65	MTL	midpoint	1.18968	1.18968	-1.59795
917	T-1918	Helskog 1978 (also in Moller 1987)	2	Varangerfjord; Gressbakken Nedre Vest	70.0058	29.1949	1	3660	80	0	3660	80	3231	229	295	midden	2	corr	Marine shell	nd	nd	negative	nd	nd	nd	nd	nd	nd	nd	0	0.1	0	0	0	0	0.642257	0	0.1	0	1	0	nd	1978	16	MTL	midpoint	1.19687	1.19687	-1.59795
918	T-1916	Helskog 1978 (also in Moller 1987)	2	Varangerfjord; Gressbakken Nedre Vest	70.0058	29.1949	1	3750	70	0	3750	70	3322.5	241.5	252.5	midden	2	corr	Marine shell	nd	nd	negative	nd	nd	nd	nd	nd	nd	nd	0	0.1	0	0	0	0	0.644757	0	0.1	0	1	0	nd	1978	16.25	MTL	midpoint	1.19821	1.19821	-1.59795
919	T-2162	Helskog 1978 (also in Moller 1987)	2	Varangerfjord; Gressbakken Nedre Vest	70.0058	29.1949	1	3930	70	0	3930	70	3534	278	214	midden	2	corr	Seal bone	nd	nd	negative	nd	nd	nd	nd	nd	nd	nd	0	0.1	0	0	0	0	0.645157	0	0.1	0	1	0	nd	1978	16.29	MTL	midpoint	1.19843	1.19843	-1.59795
920	T-2161	Helskog 1978 (also in Moller 1987)	2	Varangerfjord; Gressbakken Nedre Vest	70.0058	29.1949	1	3900	110	0	3900	110	3500	339	311	midden	2	corr	Seal bone	nd	nd	negative	nd	nd	nd	nd	nd	nd	nd	0	0.1	0	0	0	0	0.667257	0	0.1	0	1	0	nd	1978	18.5	MTL	midpoint	1.21047	1.21047	-1.59795
921	T-2476	Helskog 1978 (also in Moller 1987)	2	Varangerfjord; Gressbakken Nedre Vest	70.0058	29.1949	1	3600	80	0	3600	80	3145	244	280	midden	2	corr	Marine shell	nd	nd	negative	nd	nd	nd	nd	nd	nd	nd	0	0.1	0	0	0	0	0.672257	0	0.1	0	1	0	nd	1978	19	MTL	midpoint	1.21323	1.21323	-1.59795
922	T-2060	Helskog 1978 (also in Moller 1987)	2	Varangerfjord; Gressbakken Nedre Ost	70.0058	29.1949	1	3600	90	0	3600	90	3144	263	295	midden	0	corr	Pine	nd	nd	negative	nd	nd	nd	nd	nd	nd	nd	0	0.1	0	0	0	0	0.620257	0	0.1	0	1	0	nd	1978	13.8	MTL	midpoint	1.18521	1.18521	-1.59795
923	T-2240	Helskog 1978 (also in Moller 1987)	2	Varangerfjord; Gressbakken Nedre Ost	70.0058	29.1949	1	3550	40	0	3550	40	3820	148	121	midden	2	corr	Marine shell	nd	nd	negative	nd	nd	nd	nd	nd	nd	nd	0	0.1	0	0	0	0	0.620257	0	0.1	0	1	0	nd	1978	13.8	MTL	midpoint	1.18521	1.18521	-1.56532
924	T-2163	Helskog 1978 (also in Moller 1987)	2	Varangerfjord; Gressbakken Nedre Ost	70.0058	29.1949	1	3640	80	0	3640	80	3204.5	237.5	286.5	midden	2	corr	Marine shell	nd	nd	negative	nd	nd	nd	nd	nd	nd	nd	0	0.1	0	0	0	0	0.627257	0	0.1	0	1	0	nd	1978	14.5	MTL	midpoint	1.18889	1.18889	-1.56532
925	T-2475	Helskog 1978 (also in Moller 1987)	2	Varangerfjord; Gressbakken Nedre Ost	70.0058	29.1949	1	3800	70	0	3800	70	3388.5	245.5	248.5	midden	0	corr	Pine	nd	nd	negative	nd	nd	nd	nd	nd	nd	nd	0	0.1	0	0	0	0	0.627257	0	0.1	0	1	0	nd	1978	14.5	MTL	midpoint	1.18889	1.18889	-1.56532
926	T-2059	Helskog 1978 (also in Moller 1987)	2	Varangerfjord; Gressbakken Nedre Ost	70.0058	29.1949	1	3550	70	0	3550	70	3793.5	285.5	154.5	midden	2	corr	Marine shell	nd	nd	negative	nd	nd	nd	nd	nd	nd	nd	0	0.1	0	0	0	0	0.625257	0	0.1	0	1	0	nd	1978	14.3	MTL	midpoint	1.18783	1.18783	-1.61059
927	T-2239	Helskog 1978 (also in Moller 1987)	2	Varangerfjord; Gressbakken Nedre Ost	70.0058	29.1949	1	3600	80	0	3600	80	3145	244	280	midden	0	corr	Birch and pine	nd	nd	negative	nd	nd	nd	nd	nd	nd	nd	0	0.1	0	0	0	0	0.625257	0	0.1	0	1	0	nd	1978	14.3	MTL	midpoint	1.18783	1.18783	-1.61059
928	T-2164	Helskog 1978 (also in Moller 1987)	2	Varangerfjord; Gressbakken Nedre Ost	70.0058	29.1949	1	3880	110	0	3880	110	4225.67	555.333	292.667	midden	0	corr	Heather	nd	nd	negative	nd	nd	nd	nd	nd	nd	nd	0	0.1	0	0	0	0	0.637257	0	0.1	0	1	0	nd	1978	15.5	MTL	midpoint	1.19419	1.19419	-1.61107
929	T-2474	Helskog 1978 (also in Moller 1987)	2	Varangerfjord; Nyelv	70.0058	29.1949	1	4290	80	0	4290	80	4816	448	241	midden	2	corr	Marine shell	nd	nd	negative	nd	nd	nd	nd	nd	nd	nd	0	0.1	0	0	0	0	0.664757	0	0.1	0	1	0	nd	1978	18.25	MTL	midpoint	1.20909	1.20909	-1.61107
930	T-2055	Helskog 1978 (also in Moller 1987)	2	Varangerfjord; Nyelv	70.0058	29.1949	1	4520	90	0	4520	90	4313.5	302.5	325.5	midden	2	corr	Marine shell	nd	nd	negative	nd	nd	nd	nd	nd	nd	nd	0	0.1	0	0	0	0	0.664757	0	0.1	0	1	0	nd	1978	18.25	MTL	midpoint	1.20909	1.20909	-1.59275
931	T-1915	Helskog 1978 (also in Moller 1987)	2	Varangerfjord; Nyelv	70.0058	29.1949	1	4190	80	0	4190	80	3873	281	293	midden	2	corr	Marine shell	nd	nd	negative	nd	nd	nd	nd	nd	nd	nd	0	0.1	0	0	0	0	0.667257	0	0.1	0	1	0	nd	1978	18.5	MTL	midpoint	1.21047	1.21047	-1.59878
932	T-2053	Helskog 1978 (also in Moller 1987)	2	Varangerfjord; Nyelv	70.0058	29.1949	1	4430	80	0	4430	80	4190	285	287	midden	2	corr	Marine shell	nd	nd	negative	nd	nd	nd	nd	nd	nd	nd	0	0.1	0	0	0	0	0.667257	0	0.1	0	1	0	nd	1978	18.5	MTL	midpoint	1.21047	1.21047	-1.58528
933	T-2472	Helskog 1978	2	Varangerfjord; Lossoas hus	70.0058	29.1949	1	5670	60	0	5670	60	5680	225	188	midden	2	corr	Seal bone	nd	nd	negative	nd	nd	nd	nd	nd	nd	nd	0	0.1	0	0	0	0	0.746257	0	0.1	0	1	0	nd	1978	26.4	MTL	midpoint	1.25575	1.25575	-1.58528
934	T-2468	Helskog 1978	2	Varangerfjord; Lossoas hus	70.0058	29.1949	1	6120	90	0	6120	90	6193.5	234.5	272.5	midden	2	corr	Seal bone	nd	nd	negative	nd	nd	nd	nd	nd	nd	nd	0	0.1	0	0	0	0	0.742257	0	0.1	0	1	0	nd	1978	26	MTL	midpoint	1.25337	1.25337	-1.58528
935	T-1914	Helskog 1978	2	Varangerfjord; Lossoas hus	70.0058	29.1949	1	6840	100	0	6840	100	6985.5	267.5	291.5	midden	2	corr	Marine shell	nd	nd	negative	nd	nd	nd	nd	nd	nd	nd	0	0.1	0	0	0	0	0.742257	0	0.1	0	1	0	nd	1978	26	MTL	midpoint	1.25337	1.25337	-1.57222
936	T-2473	Helskog 1978	2	Varangerfjord; Mestersanden	69.8639	30.0681	1	1740	90	0	1740	90	978	244	245	midden	0	corr	Reindeer antler	nd	nd	negative	nd	nd	nd	nd	nd	nd	nd	0	0.1	0	0	0	0	0.5	0	0.1	0	1	0	nd	1978	7	MTL	midpoint	1.12694	1.12694	-1.56287
937	T-1728	Helskog 1978 (also in Olsen 1984 and Moller 1987 )	2	Varangerfjord; Mestersanden	69.8639	30.0681	1	1970	90	0	1970	90	1931.25	213.75	286.25	midden	2	corr	Fishbone	nd	nd	negative	nd	nd	nd	nd	nd	nd	nd	0	0.1	0	0	0	0	0.5	0	0.1	0	1	0	nd	1978	7	MTL	midpoint	1.12694	1.12694	-1.61116
938	T-1729	Helskog 1978 (also in Olsen 1984 and Moller 1987 )	2	Varangerfjord; Mestersanden	69.8639	30.0681	1	2020	110	0	2020	110	1258.5	272.5	287.5	midden	2	corr	Fishbone	nd	nd	negative	nd	nd	nd	nd	nd	nd	nd	0	0.1	0	0	0	0	0.5	0	0.1	0	1	0	nd	1978	7	MTL	midpoint	1.12694	1.12694	-1.61116
939	Hel-656	Donner. et al. 1977	2	Nesseby; mordvatnet	70.0583	28.95	1	7510	220	0	7510	220	7695.5	579.5	524.5	silty gyttja	1	5	bulk gyttja	lacustrine gyttja	black sulfide layer	negative	6.825	n/a	n/a	livingstone sampler	nd	nd	0.05	0.01	0.1	0	0	0	0	0.824873	0	0.1	0	1	0	nd	1977	34	MTL	midpoint	1.30404	1.30404	-1.61116
940	Hel-655	Donner. et al. 1977	2	Nesseby; mordvatnet	70.0583	28.95	1	8780	180	0	8780	180	9988	566	563	lacustrine gyttja	1	5	bulk gyttja	lacustrine gyttja	lacustrine gyttja	negative	7.19	n/a	n/a	livingstone sampler	nd	nd	0.05	0.01	0.1	0	0	0	0	0.840489	0	0.1	0	1	0	nd	1977	34	MTL	midpoint	1.31397	1.31397	-1.61112
941	Hel-699	Donner. et al. 1977	2	Nesseby; vaervatnet	70.0674	28.88	1	5360	110	0	5360	110	6137.17	489.833	385.167	gyttja	1	5	bulk gyttja	lacustrine gyttja	marine laminated silt	negative	4.23	n/a	n/a	livingstone sampler	nd	nd	0.05	0.01	0.1	0	0	0	0	0.714871	0	0.1	0	1	0	nd	1977	23	MTL	midpoint	1.23739	1.23739	-1.61112
942	Hel-700	Donner. et al. 1977	2	Nesseby; vaervatnet	70.0674	28.88	1	5620	190	0	5620	190	6479.5	673.5	547.5	lacustrine gyttja	1	5	bulk gyttja	lacustrine gyttja	lacustrine gyttja	negative	4.265	n/a	n/a	livingstone sampler	nd	nd	0.05	0.01	0.1	0	0	0	0	0.730491	0	0.1	0	1	0	nd	1977	23	MTL	midpoint	1.24648	1.24648	-1.28969
943	Hel-617	Tanner 1906. (as in Donner. et al. 1977 )	2	vadso; Vestre Jakobselv.; Skitnelven	70.1167	29.292	1	3830	110	0	3830	110	4757.25	505.75	339.25	stony layer	2	7	arctica islandica	sand and gravel	sand and gravel	negative	1.5	nd	0	outcrop	nd	nd	nd	0	0.1	0	0	0	0	0.5	0	0.1	0	1	0	nd	1974	6.8	MTL	midpoint	1.12694	1.12694	-1.28969
944	Hel-618	Donner. et al. 1977	2	vadso; Kariel	70.2222	29.2092	1	4190	130	0	4190	130	4383.5	416.5	397.5	gravel	2	7	mya truncata	n/a	sand and gravel	negative	0.5	nd	0	outcrop	nd	nd	nd	0	0.1	0	0	0	0	0.619	0	0.1	0	1	0	nd	1974	11.9	MTL	midpoint	1.18455	1.18455	-1.38841
945	Hel-619	Donner. et al. 1977	2	vadso; Kariel	70.0965	29.42	1	3820	130	0	3820	130	3907	407	417	gravel	2	7	arctica islandica	n/a	sand and gravel	negative	0.5	nd	0	outcrop	nd	nd	nd	0	0.1	0	0	0	0	0.5	0	0.1	0	1	0	nd	1974	11.9	MTL	midpoint	1.12694	1.12694	-1.27392
946	Hel-620	Tanner 1906. (as in Donner. et al. 1977 )	2	vadso; Kariel	70.0965	29.42	1	4400	130	0	4400	130	4666.5	395.5	432.5	gravel	2	7	mytilus edulis and modiolus modiolus	n/a	sand and gravel	negative	0.5	nd	0	outcrop	nd	nd	nd	0	0.1	0	0	0	0	0.654291	0	0.1	0	1	0	nd	1974	18.7	MTL	midpoint	1.20337	1.20337	-1.27391
947	Hel-621	Donner. et al. 1977	2	vadso; Kariel	70.0965	29.42	1	3930	130	0	3930	130	4040.5	410.5	414.5	beach sand	2	7	mytilus edulis and modiolus modiolus	n/a	sand and gravel	negative	0.5	nd	0	outcrop	nd	nd	nd	0	0.1	0	0	0	0	0.654291	0	0.1	0	1	0	nd	1974	18.7	MTL	midpoint	1.20337	1.20337	-1.28646
948	Hel-622	Donner. et al. 1977	2	vadso; Kariel	70.0842	29.6963	1	4300	160	0	4300	160	4547.5	454.5	499.5	beach sand	2	7	arctica islandica	n/a	sand and gravel	negative	0.5	nd	0	outcrop	nd	nd	nd	0	0.1	0	0	0	0	0.621304	0	0.1	0	1	0	nd	1974	15.4	MTL	midpoint	1.18576	1.18576	-1.28765
949	Hel-623	Donner. et al. 1977	2	vadso; Krampenes	70.107	30.1744	1	3680	140	0	3680	140	3710.5	443.5	388.5	beach gravel	2	7	mytilus edulis	n/a	sand and gravel	negative	0.5	nd	0	outcrop	nd	nd	nd	0	0.1	0	0	0	0	0.620312	0	0.1	0	1	0	nd	1974	15.3	MTL	midpoint	1.18524	1.18524	-1.42452
950	Hel-624	Donner. et al. 1977	2	Nesseby; Makviken	70.1493	28.8644	1	4120	130	0	4120	130	4288.5	430.5	407.5	shelly gravel and sand	2	7	mytilus edulis	n/a	sand and gravel	negative	1	nd	0	outcrop	nd	nd	nd	0	0.1	0	0	0	0	0.658	0	0.1	0	1	0	nd	1974	15.8	MTL	midpoint	1.20539	1.20539	-1.51436
951	Hel-625	Donner. et al. 1977	2	Nesseby; makviken	70.1493	28.8644	1	6430	150	0	6430	150	6967	356	409	shelly gravel and sand	2	7	mya truncata	n/a	sand and gravel	negative	1	nd	0	outcrop	nd	nd	nd	0	0.1	0	0	0	0	0.658	0	0.1	0	1	0	nd	1974	15.8	MTL	midpoint	1.20539	1.20539	-0.665796
952	Hel-626	Donner. et al. 1977	2	Nesseby; Makviken	70.1493	28.8644	1	3190	120	0	3190	120	3114.5	332.5	356.5	sand and gravel	2	7	arctica islandica	n/a	sand and gravel	negative	1	nd	0	outcrop	nd	nd	nd	0	0.1	0	0	0	0	0.612	0	0.1	0	1	0	nd	1974	11.2	MTL	midpoint	1.18091	1.18091	-0.665796
953	Hel-627	Donner. et al. 1977	2	Nesseby; Nyelven	70.0737	28.8418	1	5530	150	0	5530	150	5987	339	402	shelly sand and gravel	2	7	mytilus edulis	n/a	sand and gravel	negative	1	nd	0	outcrop	nd	nd	nd	0	0.1	0	0	0	0	0.722871	0	0.1	0	1	0	nd	1974	23.8	MTL	midpoint	1.24199	1.24199	-0.662597
954	Hel-628	Donner. et al. 1977	2	Nesseby; Nyelven	70.0737	28.8418	1	8120	170	0	8120	170	8719	512	429	shelly sand and gravel	2	7	mya truncata	n/a	sand and gravel	negative	1	nd	0	outcrop	nd	nd	nd	0	0.1	0	0	0	0	0.738	0	0.1	0	1	0	nd	1974	23.8	MTL	midpoint	1.25086	1.25086	-0.62151
955	Hel-747	Donner. et al. 1977	2	Batsfjord; Havningberg	70.6345	29.7243	1	4300	130	0	4300	130	4543	375	433	beach sand and gravel	2	7	mytilus edulis	n/a	sand and gravel	negative	0.5	nd	0	outcrop	nd	nd	nd	0	0.1	0	0	0	0	0.608657	0	0.1	0	1	0	nd	1974	14.1	MTL	midpoint	1.17918	1.17918	-0.657172
956	Hel-748	Donner. et al. 1977	2	Batsfjord; Havningberg	70.6345	29.7243	1	520	90	0	520	90	209.5	215.5	208.5	beach sand	2	7	mytilus edulis	n/a	sand and gravel	negative	0.5	nd	0	outcrop	nd	nd	nd	0	0.1	0	0	0	0	0.5	0	0.1	0	1	0	nd	1974	4	MTL	midpoint	1.12694	1.12694	-0.189451
957	Hel-749	Donner. et al. 1977	2	Batsfjord; Sandefjord	70.5119	30.5813	1	4290	120	0	4290	120	4527	348	410	shelly beach gravel and sand	2	7	mytilus edulis	n/a	sand and gravel	negative	1	nd	0	outcrop	nd	nd	nd	0	0.1	0	0	0	0	0.5	0	0.1	0	1	0	nd	1974	12.4	MTL	midpoint	1.12694	1.12694	-0.189451
958	Hel-750	Donner. et al. 1977	2	Berlevag; Store Molvik	70.7859	28.6694	1	2850	120	0	2850	120	2715.5	348.5	382.5	gravel	2	7	modiolus modiolus	n/a	sand and gravel	negative	0.5	nd	0	outcrop	nd	nd	nd	0	0.1	0	0	0	0	0.5	0	0.1	0	1	0	nd	1974	9	MTL	midpoint	1.12694	1.12694	-0.189446
959	Hel-751	Donner. et al. 1977	2	Berlevag; Kjolneset	70.842	29.119	1	3820	130	0	3820	130	3907	407	417	shelly beach gravel	2	7	mytilus edulis	n/a	sand and gravel	negative	1	nd	0	outcrop	nd	nd	nd	0	0.1	0	0	0	0	0.5	0	0.1	0	1	0	nd	1974	11.4	MTL	midpoint	1.12694	1.12694	-0.422565
960	Hel-752	Donner. et al. 1977	2	Berlevag; Sandefjorsbugten	70.7378	29.3809	1	1340	100	0	1340	100	968	272	269	shelly beach gravel	2	7	mytilus edulis	n/a	sand and gravel	negative	1	nd	0	outcrop	nd	nd	nd	0	0.1	0	0	0	0	0.5	0	0.1	0	1	0	nd	1974	4.1	MTL	midpoint	1.12694	1.12694	-0.422565
961	Hel-753	Donner. et al. 1977	2	Berlevag; Veines	70.7217	29.3347	1	2850	120	0	2850	120	2715.5	348.5	382.5	shelly beach gravel	2	7	mya truncata	n/a	sand and gravel	negative	0.5	nd	0	outcrop	nd	nd	nd	0	0.1	0	0	0	0	0.5	0	0.1	0	1	0	nd	1974	8.5	MTL	midpoint	1.12694	1.12694	-0.422565
962	Hel-754	Donner. et al. 1977	2	porsanger; Kistrandnes	70.438	25.202	1	3460	120	0	3460	120	3448.5	376.5	370.5	shelly gravel	2	7	mytilus edulis	n/a	sand and gravel	negative	0.5	nd	0	outcrop	nd	nd	nd	0	0.1	0	0	0	0	0.5	0	0.1	0	1	0	nd	1974	10.9	MTL	midpoint	1.12694	1.12694	-0.0810551
963	Hel-755	Donner. et al. 1977	2	porsanger; Myrset	69.9372	23.1859	1	4520	140	0	4520	140	4813.5	445.5	401.5	shelly gravel	2	7	modiolus modiolus	n/a	sand and gravel	negative	4.5	nd	0	outcrop	nd	nd	nd	0	0.1	0	0	0	0	0.656323	0	0.1	0	1	0	nd	1974	19	MTL	midpoint	1.20447	1.20447	-0.0810551
964	T-1161	Gulliksen et al. 1975	2	Vaksdal; Trengeroid Flate	60.4333	5.58333	1	11380	140	0	11380	140	12597	301	412	marine silt	3	corr	balanus balanus whale	glacial till	glacial till	negative	3	nd	nd	nd	nd	nd	nd	0	0.1	0	0	0	0	2.5	0	0.1	0	1	0	nd	1971	45	MTL	midpoint	2.69629	2.69629	-1.11346
965	T1162	Gulliksen et al. 1975	2	Vaksdal; Trengeroid Flate	60.4333	5.58333	1	11440	140	0	11440	140	12647	324	370	marine silt	3	corr	balanus balanus whale	glacial till	glacial till	negative	4	nd	nd	nd	nd	nd	nd	0	0.1	0	0	0	0	2.5	0	0.1	0	1	0	nd	1971	45	MTL	midpoint	2.69629	2.69629	-1.11346
966	T-1021	Gulliksen et al. 1975	2	Hordaland; Os	60.1833	5.48333	1	11280	110	0	11280	110	12520	212	395	shelly sand	2	corr	marine shells	marine sand	nd	negative	3	nd	nd	nd	nd	nd	nd	0	0.1	0	0	0	0	0.993965	0	0.1	0	1	0	nd	1969	50	MTL	midpoint	1.41703	1.41703	-1.11346
967	T-1022	Gulliksen et al. 1975	2	Hordaland; Bergen Hjellestad	60.25	5.25	1	11880	120	0	11880	120	13054.5	262.5	296.5	clay	2	corr	mya truncata	glacial till	marine clay	negative	2	nd	nd	nd	nd	nd	nd	0	0.1	0	0	0	0	5	0	0.1	0	1	0	nd	1969	15	MTL	midpoint	5.10098	5.10098	-1.11346
968	T-1160	Gulliksen et al. 1975	2	Hordaland; Os; Lekvenvann	60.1667	5.45	1	7710	100	0	7710	100	7834.5	335.5	292.5	peat bog	1	corr	gyttja	gyttja	gyttja	negative	6.8	nd	nd	54mm piston sampler	nd	nd	nd	0	0.1	0	0	0	0	0.864005	0	0.1	0	1	0	nd	1969	37	MTL	midpoint	1.3291	1.3291	-1.11346
969	T-1173	Gulliksen et al. 1975	2	Akershus; As-ski Bollerudmasan	59.7167	10.8	1	9180	180	0	9180	180	10456.8	614.25	746.75	peat bog	1	corr	gyttja	gyttja	gyttja	negative	6.8	nd	nd	nd	nd	nd	nd	0	0.1	0	0	0	0	1.34909	0	0.1	0	1	0	nd	1969	170	MTL	midpoint	1.68524	1.68524	-1.11346
970	T-1319	Gulliksen et al. 1975	2	Akershus; As-ski Bratenmyra	59.7333	10.85	1	9590	150	0	9590	150	10992.3	268.667	491.333	peat bog	2	corr	mytilus edulis shells	gyttja	brackish-marine clay	negative	1.25	nd	nd	nd	nd	nd	nd	0	0.1	0	0	0	0	1.23502	0	0.1	0	1	0	nd	1971	147	MTL	midpoint	1.59539	1.59539	-1.11346
971	T-1378	Gulliksen et al. 1975	2	Akershus; As-ski Vestby	59.6	10.7667	1	6770	100	0	6770	100	6889	317	295	gravel	2	corr	mytilus littorina and tapes decussatus	nd	nd	negative	0.6	nd	nd	nd	nd	nd	nd	0	0.1	0	0	0	0	0.775	0	0.1	0	1	0	nd	1971	55	MTL	midpoint	1.27304	1.27304	-1.11346
972	T-1341	Gulliksen et al. 1975	2	Rogaland; Stavanger Breiavatnet	58.9667	5.73333	1	2580	100	0	2580	100	1871.5	430.5	364.5	gyttja	1	corr	lacustrine gyttja	lacustrine gyttja	brackish gyttja	negative	5.45	nd	nd	nd	nd	nd	nd	0	0.1	0	0	0	0	0.5	0	0.1	0	1	0	nd	1971	4.2	MTL	midpoint	1.12694	1.12694	-0.189441
973	T-1165	Gulliksen et al. 1975	2	Rogaland; Stavanger Breiavatnet	58.9667	5.73333	1	3090	160	0	3090	160	3167	531	384	gyttja	1	corr	brackish gyttja	lacustrine gyttja	marine gyttja	negative	5.65	nd	nd	nd	nd	nd	nd	0	0.1	0	0	0	0	0.5	0	0.1	0	1	0	nd	1971	4.2	MTL	midpoint	1.12694	1.12694	-0.470865
974	T-1284	Gulliksen et al. 1975	2	Rogaland; Stavanger Breiavatnet	58.9667	5.73333	1	3150	200	0	3150	200	3459.83	419.167	675.833	gyttja	1	corr	gyttja	lacustrine gyttja	marine gyttja	negative	6.75	nd	nd	nd	nd	nd	nd	0	0.1	0	0	0	0	0.5	0	0.1	0	1	0	nd	1971	4.2	MTL	midpoint	1.12694	1.12694	-0.343058
975	T-1167	Gulliksen et al. 1975	2	Rogaland; Eigersund Gjedlestadvige	58.4167	5.98333	1	3340	80	0	3340	80	3575.75	247.25	180.75	gyttja	0	corr	charcoal	lacustrine gyttja	gyttja	negative	0.3	nd	nd	nd	nd	nd	nd	0	0.1	0	0	0	0	0.5	0	0.1	0	1	0	nd	1972	5	MTL	midpoint	1.12694	1.12694	-0.309047
976	T-1286	Gulliksen et al. 1975 (also in Simonsen 2005)	2	Rogaland; Eigersund Gjedlestadvige	58.4167	5.98333	1	5810	160	0	5810	160	6537.5	618.5	317.5	gyttja	1	corr	peat	marine sand	gyttja	positive	0.8	nd	nd	nd	nd	nd	nd	0	0.1	0	0	0	0	0.5	0	0.1	0	1	0	nd	1972	5	MTL	midpoint	1.12694	1.12694	-0.438918
977	T-1014	Utne 1973 (as in Moller 1984)	2	Flakstadoya	68.1326	13.4241	1	5250	80	0	5250	80	6070.25	202.75	302.25	midden	0	corr	refuse	n/a	n/a	nd	nd	nd	0	nd	nd	nd	nd	0	0.1	0	0	0	0	0.5	0	0.1	0	1	0	nd	1973	7.5	MTL	midpoint	1.12694	1.12694	-0.983265
978	T-1018	Utne 1973 (as in Moller 1984)	2	Flakstadoya	68.1326	13.4241	1	5080	90	0	5080	90	5832	161	230	cultural horizon	2	corr	shell	nd	beach terrace	negative	nd	nd	0	nd	nd	nd	nd	0	0.1	0	0	0	0	0.5	0	0.1	0	1	0	nd	1973	7.4	MTL	midpoint	1.12694	1.12694	-0.983265
979	T-1017	Utne 1973 (as in Moller 1984)	2	Flakstadoya	68.1326	13.4241	1	4910	80	0	4910	80	4988.5	290.5	191.5	cultural horizon	2	corr	shell	nd	beach terrace	negative	nd	nd	0	nd	nd	nd	nd	0	0.1	0	0	0	0	0.5	0	0.1	0	1	0	nd	1973	7.6	MTL	midpoint	1.12694	1.12694	-0.983265
980	T-1198	Utne 1973 (as in Moller 1984)	2	Flakstadoya	68.1326	13.4241	1	4740	140	0	4740	140	4784.5	426.5	368.5	cultural horizon	0	corr	charcoal	nd	beach terrace	negative	nd	nd	0	nd	nd	nd	nd	0	0.1	0	0	0	0	0.5	0	0.1	0	1	0	nd	1973	7.7	MTL	midpoint	1.12694	1.12694	-0.983265
981	T-1199	Utne 1973 (as in Moller 1984)	2	Flakstadoya	68.1326	13.4241	1	4000	800	0	4000	800	4460.9	1926.1	2021.9	cultural horizon	0	corr	charcoal	nd	beach terrace	negative	nd	nd	0	nd	nd	nd	nd	0	0.1	0	0	0	0	0.5	0	0.1	0	1	0	nd	1973	7.3	MTL	midpoint	1.12694	1.12694	-1.18854
982	T-1016	Utne 1973 (as in Moller 1984)	2	Flakstadoya	68.1326	13.4241	1	2460	70	0	2460	70	2546.7	172.3	187.7	cultural horizon	0	corr	charcoal	nd	beach terrace	negative	nd	nd	0	nd	nd	nd	nd	0	0.1	0	0	0	0	0.5	0	0.1	0	1	0	nd	1973	7.5	MTL	midpoint	1.12694	1.12694	-0.554774
983	T-1013	Utne 1973 (as in Moller 1984)	2	Flakstadoya	68.1326	13.4241	1	2330	100	0	2330	100	2318.38	391.625	197.375	cultural horizon	0	corr	charcoal	nd	beach terrace	negative	nd	nd	0	nd	nd	nd	nd	0	0.1	0	0	0	0	0.5	0	0.1	0	1	0	nd	1973	7.7	MTL	midpoint	1.12694	1.12694	-0.554775
984	T-1200	Utne 1973 (as in Moller 1984)	2	Flakstadoya	68.1326	13.4241	1	2060	80	0	2060	80	2048	257	226	cultural horizon	0	corr	charcoal	nd	beach terrace	negative	nd	nd	0	nd	nd	nd	nd	0	0.1	0	0	0	0	0.5	0	0.1	0	1	0	nd	1973	7.8	MTL	midpoint	1.12694	1.12694	-0.554774
985	T-1100	Nydal et al. 1972	2	Oslo Ulleval stadion	59.95	10.7333	1	8210	110	0	8210	110	9152.25	319.75	379.25	clay	0	0	pinus sylvestris trunk	clay	clay	negative	2.5	nd	nd	nd	nd	nd	nd	nd	0.1	0	0	0	0	0.990019	0	0.1	0	1	0	nd	1967	98	MTL	midpoint	1.41426	1.41426	-0.945045
986	T-852	Nydal et al. 1972	2	Rogaland; Vikedal Solheim	59.5333	5.95	1	8240	110	0	8240	110	9236.75	364.25	589.75	peat bog	1	5	gyttja	gyttja	glacio-lacustrine silt and sand	negative	2.5	nd	nd	nd	nd	nd	nd	nd	0.1	0	0	0	0	0.922941	0	0.1	0	1	0	nd	1967	85	MTL	midpoint	1.36814	1.36814	-1.31688
987	T-839	Nydal et al. 1972	2	Hordaland; Ryggjaheim Ungdomsherberge	59.5667	5.81667	1	8770	130	0	8770	130	9990.88	389.125	513.875	peat bog	1	5	gyttja	gyttja	clay	negative	3.87	0.13	nd	nd	nd	nd	nd	nd	0.1	0	0	0	0	0.778559	0	0.1	0	1	0	nd	1967	56	MTL	midpoint	1.27521	1.27521	-0.99086
988	T-585	Nydal et al. 1972	2	Hordaland; hardanger. Kinsarvik busnes	60.4667	5.93333	1	9720	330	0	9720	330	11329.7	1138.3	1080.7	peat bog	1	5	gyttja	gyttja	nd	negative	3	nd	nd	nd	nd	nd	nd	nd	0.1	0	0	0	0	1.06335	0	0.1	0	1	0	nd	1966	113	MTL	midpoint	1.46653	1.46653	-1.56875
989	T-790	Nydal et al. 1972	2	Hordaland; Hardanger Ulvik Instavatnet	60.6	7	1	5980	90	0	5980	90	7008	299	519	peat bog	1	5	gyttja	gyttja	nd	negative	3	nd	nd	nd	nd	nd	nd	nd	0.1	0	0	0	0	3.99778	0	0.1	0	1	0	nd	1966	700	MTL	midpoint	4.12337	4.12337	-1.56875
990	T-827	Nydal et al. 1972	2	More og Romsdal Haramsoy Torgarden	62.6667	6.21667	1	9480	150	0	9480	150	10902.2	488.75	658.25	peat bog	1	5	gyttja	beach deposit	basal coarse sands	negative	9	0.05	1	nd	0.05	measured	0.125	0.1	0.1	0.05	0.18	0	0	1.5	0	0.1	0	1	0	nd	1965	9	MTL	midpoint	1.82069	1.81177	-1.56875
991	T-828	Nydal et al. 1972	2	More og Romsdal Haramsoy Torgarden	62.6667	6.21667	1	8920	110	0	8920	110	10072.5	433.5	522.5	peat bog	1	5	gyttja	beach deposit	basal coarse sands	negative	8.9	nd	nd	nd	nd	nd	nd	nd	0.1	0	0	0	0	1.5	0	0.1	0	1	0	nd	1965	9	MTL	midpoint	1.80831	1.80831	-0.41
992	T-829	Nydal et al. 1972	2	More og Romsdal Haramsoy Torgarden	62.6667	6.21667	1	8340	140	0	8340	140	9257.33	851.667	529.333	peat bog	1	5	gyttja	beach deposit	basal coarse sands	negative	8.7	nd	nd	nd	nd	nd	nd	nd	0.1	0	0	0	0	1.5	0	0.1	0	1	0	nd	1965	9	MTL	midpoint	1.80831	1.80831	-0.108551
993	T-830	Nydal et al. 1972	2	More og Romsdal Haramsoy Torgarden	62.6667	6.21667	1	8360	110	0	8360	110	9283.25	824.75	497.25	peat bog	1	5	gyttja	beach deposit	basal coarse sands	negative	8.4	nd	nd	nd	nd	nd	nd	nd	0.1	0	0	0	0	1.5	0	0.1	0	1	0	nd	1965	9	MTL	midpoint	1.80831	1.80831	-0.108551
994	T-831	Nydal et al. 1972	2	More og Romsdal Haramsoy Torgarden	62.6667	6.21667	1	7280	100	0	7280	100	8199.5	316.5	408.5	peat bog	1	5	gyttja	beach deposit	basal coarse sands	negative	8.2	nd	nd	nd	nd	nd	nd	nd	0.1	0	0	0	0	1.5	0	0.1	0	1	0	nd	1965	9	MTL	midpoint	1.80831	1.80831	-0.189363
995	T-726	Nydal et al. 1972	2	Nord-Trondelag; Overhalla Skage	64.5333	11.75	1	8020	150	0	8020	150	8957.67	517.333	493.667	peat bog	1	5	gyttja	gyttja	gyttja	negative	7.1	nd	nd	Hiller borer	nd	nd	nd	nd	0.1	0	0	0	0	1.289	0	0.1	0	1	0	nd	1966	159	MTL	midpoint	1.63754	1.63754	-0.189363
996	T-786	Nydal et al. 1972	2	Sor-Trondelag; Trondheim Ekle	63.3667	10.4333	1	10230	130	0	10230	130	12589.2	232.75	543.25	sandy clay from gravel pit	2	7	barnacles	nd	outwash delta	negative	nd	nd	nd	nd	nd	nd	nd	nd	0.1	0	0	0	0	1.125	0	0.1	0	1	0	nd	1968	125	MTL	midpoint	1.51183	1.51183	-0.189363
997	T-787	Nydal et al. 1972	2	Sor-Trondelag; Trondheim Ekle	63.3667	10.4	1	11290	190	0	11290	190	12989.5	432.5	351.5	outwash sediments	3	7	whale vertebra	outwash deposits	outwash deposits	negative	nd	nd	nd	nd	nd	nd	nd	nd	0.1	0	0	0	0	2	0	0.1	0	1	0	nd	1962	135	MTL	midpoint	2.24054	2.24054	-0.554843
998	T-854	Nydal et al. 1972	2	Sor-Trondelag; Trondheim Ekle	63.3667	10.4333	1	10150	100	0	10150	100	11624	372	384	outwash sediments	2	7	mya truncata	outwash deposits	outwash deposits	negative	nd	nd	nd	nd	nd	nd	nd	nd	0.1	0	0	0	0	2	0	0.1	0	1	0	nd	1969	125	MTL	midpoint	2.24054	2.24054	-0.425904
999	T-756	Nydal et al. 1972	2	Nordland.; oksnes. Nordsand	68.9167	14.9167	1	5520	110	0	5520	110	5761.5	433.5	412.5	peat bog	1	5	bulk peat	peat	nd	negative	1.6	nd	nd	nd	nd	nd	nd	nd	0.1	0	0	0	0	#VALUE!	0	0.1	0	1	0	nd	1969	nd	MTL	midpoint	#VALUE!	#VALUE!	-0.65812
1000	T-930	Nydal et al. 1972	2	Nordland Vestvagoy Ramsvik slettbakkmyr	68.1167	13.6667	1	9860	120	0	9860	120	11443.8	358.167	658.833	peat bog	0	0	wood	peat	gravel	negative	2.9	nd	nd	piston corer	nd	nd	nd	nd	0.1	0	0	0	0	0.776408	0	0.1	0	1	0	nd	1968	29	MTL	midpoint	1.2739	1.2739	-0.667667
1001	T-963	Nydal et al. 1972	2	Nordland; Andoya endletsvann	69.25	16.0833	1	12710	200	0	12710	200	15263	644	1071	mire	1	5	gyttja	black gyttja	brown gyttja	negative	7.47	nd	nd	Hiller borer	nd	nd	nd	nd	0.1	0	0	0	0	0.820378	0	0.1	0	1	0	nd	1970	33	MTL	midpoint	1.30116	1.30116	-1.29101
1002	T-746	Nydal et al. 1972	2	Ost-Finnmark;Sor-Varanger Neiden Faerdesmyra	69.7064	29.4046	1	4430	80	0	4430	80	5080.75	503.25	428.75	peat bog	1	5	sphagnum lindbergii peat	peat	peat	negative	1.1	nd	nd	nd	nd	nd	nd	nd	0.1	0	0	0	0	0.842596	0	0.1	0	1	0	nd	1968	70	MTL	midpoint	1.31528	1.31528	-1.25658
1003	T-936	Nydal et al. 1972	2	Ost-Finnmark;Sor-Varanger Neiden Faerdesmyra	69.7064	29.4046	1	2210	90	0	2210	90	2321.75	417.25	442.75	peat bog	1	5	sphagnum lindbergii peat	peat	peat	negative	0.23	nd	nd	nd	nd	nd	nd	nd	0.1	0	0	0	0	0.842596	0	0.1	0	1	0	nd	1968	70	MTL	midpoint	1.31528	1.31528	-0.438918
1004	T-744	Nydal et al. 1972	2	Ost-Finnmark;Sor-Varanger Neiden Faerdesmyra	69.7064	29.4046	1	530	60	0	530	60	591	312	300	peat bog	1	5	sphagnum lindbergii peat	peat	peat	negative	0.23	nd	nd	nd	nd	nd	nd	nd	0.1	0	0	0	0	0.842596	0	0.1	0	1	0	nd	1968	70	MTL	midpoint	1.31528	1.31528	-1.38858
1005	T-520	Nydal et al 1970	2	Rogaland; Suldal Vasstolvatn lake	59.7167	6.86667	1	6770	150	0	6770	150	7676.33	478.667	399.333	peat	1	5	peat	marine sediment	freshwater gyttja	negative	2.9	nd	nd	Hiller borer	nd	nd	nd	nd	0.1	0	0	0	0	0.5	0	0.1	0	1	0	nd	1966	7	MTL	midpoint	1.12694	1.12694	-1.23145
1006	T-636	Nydal et al 1970 (also reported in Hafsten 1979 and Hafsten 1983)	2	Vest-Agder; Lista Farm Vollmona Royrtjonn lake	58.0833	6.8	1	6770	150	0	6770	150	7676.33	478.667	399.333	freshwater gyttja	1	5	peat	marine sediment	freshwater gyttja	negative	2.9	nd	nd	Hiller borer	nd	nd	nd	nd	0.1	0	0	0	0	0.5	0	0.1	0	1	0	nd	1966	7	MTL	midpoint	1.12694	1.12694	-1.13532
1007	T-635	Nydal et al 1970 (also reported in Hafsten 1979 and Hafsten 1983)	2	Vest-Agder; Lista Farm Vollmona Royrtjonn lake	58.0833	6.8	1	4850	100	0	4850	100	5721.88	452.125	648.875	freshwater gyttja	1	5	peat	freshwater gyttja	marine sediment	positive	2.72	nd	nd	Hiller borer	nd	nd	nd	nd	0.1	0	0	0	0	0.5	0	0.1	0	1	0	nd	1966	7	MTL	midpoint	1.12694	1.12694	-1.30805
1008	T-658b	Nydal et al 1970	2	Akershus; Baerum Floytmyr bog	59.9833	10.6167	1	3670	90	0	3670	90	4014.5	555.5	432.5	freshwater gyttja	1	5	sphagnum peat	freshwater gyttja	freshwater gyttja	negative	2.075	0	nd	Hiller borer	nd	nd	nd	nd	0.1	0	0	0	0	1.45909	0	0.1	0	1	0	nd	1967	192	MTL	midpoint	1.77453	1.77453	-1.21981
1009	T-658a	Nydal et al 1970	2	Akershus; Baerum Floytmyr bog	59.9833	10.6167	1	3780	100	0	3780	100	4085.25	349.75	253.25	freshwater gyttja	0	0	charcoal	freshwater gyttja	freshwater gyttja	negative	2.075	0	nd	Hiller borer	nd	nd	nd	nd	0.1	0	0	0	0	1.45909	0	0.1	0	1	0	nd	1967	192	MTL	midpoint	1.77453	1.77453	-1.39888
1010	T-657	Nydal et al 1970	2	Akershus; Baerum Floytmyr bog	59.9833	10.6167	1	9150	150	0	9150	150	10521	575	748	nekron mud	1	5	bulk mud	freshwater gyttja	marine nekron clay mud	negative	6	0	nd	Hiller borer	nd	nd	nd	nd	0.1	0	0	0	0	1.45909	0	0.1	0	1	0	nd	1967	192	MTL	midpoint	1.77453	1.77453	-1.13532
1011	T-681	Nydal et al 1970	2	Sor-Trondelag Trondheim Bog Sjetnemyr	63.35	10.3833	1	8370	90	0	8370	90	9413	482	418	peat	1	5	gyttja	freshwater facies	dark marine layer	negative	nd	nd	nd	nd	nd	nd	nd	nd	0.1	0	0	0	0	1.29718	0	0.1	0	1	0	nd	1969	160	MTL	midpoint	1.64398	1.64398	-1.39853
1012	T-616	Nydal et al 1970	2	Sogn og Fjordane; stryn Olden Haaheim Lake Oldevannet	61.7833	6.83333	1	9240	200	0	9240	200	10405.5	696.5	621.5	marine clay	2	0	cyprina islandica and cardium echinatum shells	nd	nd	nd	nd	nd	nd	nd	nd	nd	nd	nd	0.1	0	0	0	0	0.81	0	0.1	0	1	0	nd	1965	31	MTL	midpoint	1.29464	1.29464	-1.39853
1013	T-580	Nydal et al 1970	2	Hordaland; Lepsoyvann	60.15	5.46667	1	8380	180	0	8380	180	8630.5	635.5	529.5	lacustrine gyttja	1	5	find detrital gyttja	nd	marine clay	negative	9.6	nd	nd	Hiller borer	0.05	nd	0.05	nd	0.1	0	0	0	0	0.693998	0	0.1	0	1	0	nd	1965	20	MTL	midpoint	1.22541	1.22541	-1.61099
1014	T-594	Nydal et al 1970	2	Hordaland; Fusa Vindenes	60.15	5.63333	1	10970	180	0	10970	180	13189.2	404.75	345.25	clay	2	7	mya truncata	clay	clay	nd	nd	nd	nd	nd	nd	nd	nd	nd	0.1	0	0	0	0	0.5	0	0.1	0	1	0	nd	1920	5	MTL	midpoint	1.12694	1.12694	-0.303544
1015	T-505	Nydal et al 1970	2	Troms; Karlsoy Vannoy Bekkestrand	70.1333	19.6667	1	4130	100	0	4130	100	3778.5	336.5	328.5	peat	0	0	larix driftwood	peat	peat	nd	1.5	nd	nd	nd	nd	nd	nd	nd	0.1	0	0	0	0	0.5	0	0.1	0	1	0	nd	1964	7.15	MTL	midpoint	1.12694	1.12694	-0.325337
1016	T-504	Nydal et al 1970	2	Troms; Karlsoy nord-klavoy skjervik	70.1667	19.2333	1	3130	110	0	3130	110	3371.5	198.5	406.5	peat	0	0	larix driftwood	peat	peat	nd	0.5	nd	nd	nd	nd	nd	nd	nd	0.1	0	0	0	0	0.5	0	0.1	0	1	0	nd	1964	5.42	MTL	midpoint	1.12694	1.12694	-1.13837
1017	T-886	Rye 1969	2	Hardanger; Eidfjord	60.4614	7.09178	1	9680	90	0	9680	90	10957.2	283.833	246.167	glacio-marine sediment	0	0	juniperus communis	glaciomarine foreset	marine sediment	nd	nd	nd	nd	nd	nd	nd	nd	nd	0.1	0	0	0	0	2	0	0.1	0	1	0	nd	1950	18	MTL	midpoint	2.24054	2.24054	-1.21981
1018	T-631	Andersen 1968 (as in nydal et al 1970)	2	Troms; Oldervik	69.75	19.6667	1	11550	190	0	11550	190	13769.8	1022.25	431.75	clay	2	7	mya truncata hiatella arctica macoma calcarea	marine terrace sediment	nd	nd	nd	nd	nd	nd	nd	nd	nd	nd	0.1	0	0	0	0	3	0	0.1	0	1	0	nd	1965	53	MTL	midpoint	3.16544	3.16544	-1.21981
1019	T-512	Andersen 1968 (as in nydal et al 1970)	2	Troms; Gratangen	68.6667	17.75	1	9470	160	0	9470	160	10470.5	587.5	416.5	sand and silt	2	7	mya truncata hiatella arctica macoma calcarea	glaciomarine gravelly sediments	nd	nd	nd	nd	nd	nd	nd	nd	nd	nd	0.1	0	0	0	0	3	0	0.1	0	1	0	nd	1965	27.5	MTL	midpoint	3.16544	3.16544	-1.00833
1020	T-174	Andersen 1968 (as in nydal et al 1970)	2	Troms; Bjorelvnes	69.3667	18.0833	1	11150	500	0	11150	500	12788.5	1147.5	1455.5	foreset beds	1	7	macoma calcarea	gravel and sand	nd	negative	nd	nd	nd	nd	nd	nd	nd	nd	0.1	0	0	0	0	3	0	0.1	0	1	0	nd	1968	27	MTL	midpoint	3.16544	3.16544	-1.00783
1021	T-173	Andersen 1968 (as in nydal et al 1970)	2	Troms; Brostad	69.0833	17.6667	1	10100	500	0	10100	500	12285	1040	1541	bouldery gravel	1	7	porlandia arctica macoma calcarea	gravel and sand	nd	negative	4	nd	nd	nd	nd	nd	nd	nd	0.1	0	0	0	0	3	0	0.1	0	1	0	nd	1968	50	MTL	midpoint	3.16544	3.16544	-1.00783
1022	T-490	Andersen 1968 (as in nydal et al 1970)	2	Troms; Sandstrand	68.6667	16.75	1	12310	100	0	12310	100	15139	405	591	bouldery gravel	2	7	mya truncata	well sorted beach sand	marine sand with boulders	negative	1.5	0	nd	nd	nd	nd	nd	nd	0.1	0	0	0	0	3	0	0.1	0	1	0	nd	1968	74	MTL	midpoint	3.16544	3.16544	-1.00783
1023	T-510	Andersen 1968 (as in nydal et al 1970)	2	Troms; Balsfjord storsteinnes	69.2	19.25	1	9140	110	0	9140	110	10088	379	403	marine clay	2	7	mya truncata and macoma calcarea	nd	nd	nd	nd	nd	nd	nd	nd	nd	nd	nd	0.1	0	0	0	0	3	0	0.1	0	1	0	nd	1965	45	MTL	midpoint	3.16544	3.16544	-1.0123
1024	T-511	Andersen 1968	2	Troms; Bjorelvnes	69.3667	18.0833	1	11290	210	0	11290	210	12878	466	423	wellsorted silt sand gravel beds	2	7	mya truncata and macoma calcarea	gravel and sand	gravel beds	negative	nd	nd	nd	nd	nd	nd	nd	nd	0.1	0	0	0	0	3	0	0.1	0	1	0	nd	1968	39	MTL	midpoint	3.16544	3.16544	-1.01121
1025	T-332	Andersen 1968	2	Svensby; Ullsvfjord	69.6547	19.611	1	11090	190	0	11090	190	12733	420	484	glacio-marine blue clay	0	7	mya truncata hiatella arctica	nd	blue clay	nd	nd	nd	nd	nd	nd	nd	nd	nd	0.1	0	0	0	0	3	0	0.1	0	1	0	nd	1968	20	MTL	midpoint	3.16544	3.16544	-1.01455
1026	T-509	Andersen 1968	2	Svensby; Ullsvfjord	69.6547	19.611	1	11200	190	0	11200	190	13492.8	495.25	395.75	glacio-marine blue clay	2	7	mya truncata hiatella arctica	nd	blue clay	nd	nd	nd	nd	nd	nd	nd	nd	nd	0.1	0	0	0	0	3	0	0.1	0	1	0	nd	1968	42.5	MTL	midpoint	3.16544	3.16544	-1.01057
1027	T-196	Simonsen, 1968 (as in Moller 1987)	2	Finnmark; Grobakkeengen	70.0723	28.8953	1	4750	150		4750	150	4623.5	513.5	537.5	cultural layer	1		Charcoal	nd	nd	nd	nd	nd	n/a	nd	nd	nd	nd	0	0	0	0	0	0	0.675152	0	0.1	0	1	0	nd	1987	19.3	MTL	midpoint	1.21071	1.21071	-1.22844
1028	T-370	Nydal et al 1964	2	Hordaland; stord; Tveitavatn	59.7667	5.48333	1	4090	150	0	4090	150	4572.5	727.5	478.5	peat bog	1	5	diatomaceous mud; cladium mariscus pollen i.e. sedge and oak pollen	coarse detritus gel-mud	coarse detritus gel-mud	negative	3.35	nd	nd	nd	nd	nd	nd	nd	0.1	0	0	0	0	0.857445	0	0.1	0	1	0	nd	1962	36	MTL	midpoint	1.32484	1.32484	-1.26179
1029	T-302	Nydal et al 1964	2	Sogn og Fjordane; kyrkjebo. Instevik	61.1167	6	1	10250	440	0	10250	440	12440.5	962.5	1238.5	glaciomarine sand and gravel	2	7	mya truncata saxicava arctica pectin islandicus	nd	nd	nd	nd	nd	nd	nd	nd	nd	nd	nd	0.1	0	0	0	0	0.7	0	0.1	0	1	0	nd	1951	20	MTL	midpoint	1.22882	1.22882	-1.53964
1030	T-390	Nydal et al 1964	2	Sor-trondelag; orlandet bjugnholmen	63.75	9.56667	1	10310	180	0	10310	180	11616	666	494	marine deposit	2	7	saxicava arctica	nd	nd	nd	nd	nd	nd	nd	nd	nd	nd	nd	0.1	0	0	0	0	0.5	0	0.1	0	1	0	nd	1960	0	MTL	midpoint	1.12694	1.12694	-1.21814
1031	T-379	Nydal et al 1964	2	Troms; Skanland Sandstrand	68.6667	16.75	1	11430	260	0	11430	260	13140.5	604.5	500.5	clay	2	7	mya truncata	clay	blue clay	nd	7	nd	nd	nd	nd	nd	nd	nd	0.1	0	0	0	0	3	0	0.1	0	1	0	nd	1960	73.5	MTL	midpoint	3.16544	3.16544	-1.57422
1032	T-378B	Nydal et al 1964	2	Troms; Skanland Sandstrand	68.6667	16.75	1	11480	260	0	11480	260	13090	615	497	clay	3	7	whale bones	clay	blue clay	nd	7.5	nd	nd	nd	nd	nd	nd	nd	0.1	0	0	0	0	3	0	0.1	0	1	0	nd	1960	72.8	MTL	midpoint	3.16544	3.16544	-1.28235
1033	T-272	Nydal et al 1964	2	Andoy; Ramsa	69.1667	16.0833	1	8600	150	0	8600	150	9392.5	466.5	415.5	gyttja	2	7	Cyprina islandica	peat	rock fragments	nd	nd	nd	nd	nd	nd	nd	nd	0.15	0.1	0	0	0	0	#VALUE!	0	0.1	0	1	0	nd	1960	nd	MTL	midpoint	#VALUE!	#VALUE!	-1.28235
1034	T-382	Nydal et al 1964	2	Andoy; Ramsa	69.1764	16.0859	1	10940	240	0	10940	240	12191	564	889	peat	1	5	peat	peat	peat	nd	nd	nd	nd	nd	nd	nd	nd	0.15	0.1	0	0	0	0	0.5	0	0.1	0	1	0	nd	1960	0.9	MTL	midpoint	1.13688	1.13688	-0.962062
1035	T-380	Nydal et al 1964	2	Andoy; Ramsa	69.1764	16.0859	1	9660	210	0	9660	210	11008	683	703	gravel	0	0	scattered straws	peat	nd	positive	nd	0	0	nd	nd	nd	nd	0.15	0.1	0	0	0	0	0.5	0	0.1	0	1	0	nd	1960	0.6	MTL	midpoint	1.13688	1.13688	-0.953813
1036	T-271B	Nydal et al 1964	2	Andoy; Ramsa	69.1764	16.0859	1	10950	130	0	10950	130	12982.5	324.5	357.5	peat bog	1	5	peat	peat and sand	gravel	positive	nd	0	0	nd	nd	nd	nd	0.15	0.1	0	0	0	0	0.5	0	0.1	0	1	0	nd	1960	0.75	MTL	midpoint	1.13688	1.13688	-1.55794
1037	T-350	Nydal et al 1964	2	Andoy; Dverberg Saura I	69.1333	15.9833	1	2200	100	0	2200	100	2204	223	367	marine seafloor surface	0	0	Larix	peat	nd	nd	nd	nd	nd	nd	0.75	nd	1	0.25	0.1	0	0	0	0	0.5	0	0.1	0	1	0	nd	1961	2.7	MTL	midpoint	1.15434	1.15434	-1.00783
1038	T-385	Nydal et al 1964	2	Andoy; Dverberg Saura II	69.1167	16.05	1	2710	90	0	2710	90	2806	267	315	peat	0	0	Larix	peat	beach sand	nd	nd	nd	nd	nd	1	nd	1	0.1	0.1	0	0	0	0	0.5	0	0.1	0	1	0	nd	1961	3.7	MTL	midpoint	1.13137	1.13137	-1.00783
1039	St-926	Nydal et al 1964	2	Andoy; Dverberg Church	69.1167	15.95	1	2780	65	0	2780	65	2872	228	132	peat	0	0	pinus	peat	beach sand	nd	nd	nd	nd	nd	1	measured	1	0.1	0.1	0	0	0	0	0.5	0	0.1	0	1	0	nd	1961	4	MTL	midpoint	1.13137	1.13137	-1.00783
1040	T-351	Nydal et al 1964	2	Andoy; Dverberg kvalnesvberget	69.15	16.0333	1	3070	100	0	3070	100	3263	217	330	sand	0	0	pinus	peat	nd	nd	nd	nd	nd	nd	1	measured	1	0.1	0.1	0	0	0	0	0.5	0	0.1	0	1	0	nd	1961	4.7	MTL	midpoint	1.13137	1.13137	-1.00783
1041	T-186	Marthinussen 1962	2	Finnmark; Saraberget	71.0579	23.9878	1	4100	100	0	4100	100	4626.5	223.5	369.5	peat bog	0	0	picea	peat	n/a	negative	1.5	0	0	nd	nd	nd	nd	0	0.1	0	0	0	0	0.5	0	0.1	0	1	0	nd	1960	6.5	MTL	midpoint	1.12694	1.12694	-1.21981
1042	T-244	Marthinussen 1962	2	Finnmark; Lyngpollen	71.0708	25.3119	1	4100	150	0	4100	150	4588	433	494	peat bog	0	0	larix	peat	n/a	negative	1.3	0	0	nd	nd	nd	nd	0.1	0.1	0	0	0	0	0.5	0	0.1	0	1	0	nd	1960	7.8	MTL	midpoint	1.13137	1.13137	-1.21981
1043	T-243	Marthinussen 1962	2	Finnmark; Austbotn	70.0813	25.1734	1	2450	100	0	2450	100	2565.67	188.333	405.667	peat bog	0	0	larix	peat	n/a	negative	1.2	0	0	nd	nd	nd	nd	0	0.1	0	0	0	0	0.5	0	0.1	0	1	0	nd	1960	6	MTL	midpoint	1.12694	1.12694	-1.21981
1044	T-185	Marthinussen 1962	2	Finnmark; Djupdalen	71.079	24.06	1	6350	150	0	6350	150	7334.5	228.5	479.5	peat bog	0	0	pinus	peat	n/a	negative	1.4	0	0	nd	nd	nd	nd	0	0.1	0	0	0	0	0.5	0	0.1	0	1	0	nd	1960	8.9	MTL	midpoint	1.12694	1.12694	-1.00783
1045	T-182	Marthinussen 1962	2	Finnmark; Tomaselv	70.112	29.6437	1	7750	150	0	7750	150	8561.5	429.5	354.5	peat bog	0	0	pinus	marine shore gravel	sea-washed gravel	negative	1	0	0	nd	0.08	measured	0.2	0.15	0.1	0	0	0	0	0.745	0	0.1	0	1	0	nd	1960	24.5	MTL	midpoint	1.26393	1.26393	-1.01359
1046	T-183	Marthinussen 1962	2	Finnmark; Borfjordbotn	70.6166	22.7152	1	5700	150	0	5700	150	6627.25	524.75	498.25	peat bog	0	5	peat	peat	n/a	negative	1.65	0	0	nd	nd	nd	nd	0.15	0.1	0	0	0	0	0.5	0	0.1	0	1	0	nd	1960	11	MTL	midpoint	1.13688	1.13688	-0.146472
1047	T-184	Marthinussen 1962	2	Finnmark; Borfjordbotn	70.6166	22.7152	1	5500	150	0	5500	150	6210.75	415.25	286.75	peat bog	0	0	picea	peat	n/a	negative	1.65	0	0	nd	nd	nd	nd	0.15	0.1	0	0	0	0	0.5	0	0.1	0	1	0	nd	1960	11	MTL	midpoint	1.13688	1.13688	-0.147452
1048	T-267	Marthinussen 1962	2	Andoy; Nord-Mjele	69.135	15.679	1	6250	200	0	6250	200	7111.5	448.5	452.5	peat bog	0	0	picea	peat	n/a	negative	1.85	0	0	nd	nd	nd	nd	0.15	0.1	0	0	0	0	0.5	0	0.1	0	1	0	nd	1960	5.15	MTL	midpoint	1.13688	1.13688	-0.147452
1049	T-266	Marthinussen 1962	2	Andoy; Noss	69.0726	15.5552	1	4500	150	0	4500	150	5078	501	424	peat bog	0	0	picea	peat	sand	negative	1	0	0	nd	nd	nd	nd	0	0.1	0	0	0	0	0.5	0	0.1	0	1	0	nd	1960	7.4	MTL	midpoint	1.12694	1.12694	-0.122495
1050	T-245	Marthinussen 1962	2	Finnmark; Skallelv	70.1913	30.3153	1	850	80	0	850	80	733.5	193.5	166.5	peat bog	0	0	larix	peat	n/a	negative	0.65	0	0	nd	nd	nd	nd	0.15	0.1	0	0	0	0	0.5	0	0.1	0	1	0	nd	1960	2.25	MTL	midpoint	1.13688	1.13688	-0.149181
1051	T-271	Marthinussen 1962	2	Andoy; Ramsa	69.1764	16.0859	1	10600	250	0	10600	250	12306.4	857.643	798.357	peat bog	1	5	peat	peat and sand	gravel	positive	nd	0	0	nd	nd	nd	nd	0.15	0.1	0	0	0	0	0.5	0	0.1	0	1	0	nd	1960	0.75	MTL	midpoint	1.13688	1.13688	-1.41521
1052	T-294	Marthinussen 1962	2	Andoy; Ramsa	69.1764	16.0859	1	9900	200	0	9900	200	11642	826	905	peat bog	1	5	peat	marine shore gravel	peat	positive	nd	0	0	nd	nd	nd	nd	0.15	0.1	0	0	0	0	0.5	0	0.1	0	1	0	nd	1960	1.05	MTL	midpoint	1.13688	1.13688	-1.44956
1053	T-295	Marthinussen 1962	2	Andoy; Ramsa	69.1764	16.0859	1	9450	250	0	9450	250	10989	818	1028	peat bog	1	5	peat rich in wood	peat	n/a	positive	nd	0	0	nd	nd	nd	nd	0.15	0.1	0	0	0	0	0.5	0	0.1	0	1	0	nd	1960	1.3	MTL	midpoint	1.13688	1.13688	-1.44952
1054	T-270	Marthinussen 1962	2	Andoy; Ramsa	69.1764	16.0859	1	7400	150	0	7400	150	8175	575	378	peat bog	1	5	peat	marine shore gravel	n/a	positive	nd	0	0	nd	nd	nd	nd	0.15	0.1	0	0	0	0	0.5	0	0.1	0	1	0	nd	1960	1.8	MTL	midpoint	1.13688	1.13688	-1.14157
1055	T-214	Marthinussen 1962	2	Troms; Sandstrand; Sandvatnet	68.6667	16.75	1	12300	250	0	12300	250	14887.8	887.25	789.75	blue clay	2	7	mya truncata	sand	sand	nd	nd	nd	nd	nd	nd	nd	nd	nd	0.1	0	0	0	0	0.805	0	0.1	0	1	0	nd	1960	30.5	MTL	midpoint	1.29152	1.29152	-1.2316
1056	T-316	Marthinussen 1962	2	Troms; Sandstrand; Sandvatnet	68.6667	16.75	1	12300	250	0	12300	250	13848.5	668.5	680.5	shore gravel	2	7	mya truncata	gravel	nd	nd	nd	nd	nd	nd	nd	nd	nd	nd	0.1	0	0	0	0	0.8665	0	0.1	0	1	0	nd	1960	73.3	MTL	midpoint	1.33072	1.33072	-1.36906
1057	T-269	Nydal 1962	2	Troms; Evenskjaer Sandstrand	68.6667	16.75	1	12300	250	0	12300	250	13848.5	668.5	680.5	sandy clay	2	7	macoma calcarea	clay	nd	nd	nd	nd	nd	nd	nd	nd	nd	nd	0.1	0	0	0	0	0.845	0	0.1	0	1	0	nd	1960	69	MTL	midpoint	1.31682	1.31682	-1.42655
1058	T-296	nydal 1962	2	Andoy; Ramsa	69.1764	16.0859	1	6100	150	0	6100	150	6289	495	496	peat bog	1	5	peat	peat	n/a	positive	nd	0	0	nd	nd	nd	nd	0.15	0.1	0	0	0	0	0.5	0	0.1	0	1	0	nd	1960	4.1	MTL	midpoint	1.13688	1.13688	-0.189448
1059	T-293	nydal 1962	2	Borgund; more og romsdal	62.4667	6.25	1	8250	250	0	8250	250	9282.33	838.667	744.333	peat bog	1	5	gyttja	marine clay gyttja	lacustrine drift gyttja	positive	0.4	nd	nd	nd	nd	nd	nd	0.05	0.1	0	0	0	0	0.5	0	0.1	0	1	0	nd	1960	0.5	MTL	midpoint	1.12805	1.12805	-0.189423
1060	T-292	nydal 1962	2	Hartmark; launesmyra	58.0167	7.63333	1	6800	170	0	6800	170	7998.67	349.333	315.667	peat bog	2	7	ostrea edulis	peat	peat	negative	5.5	nd	nd	nd	nd	nd	nd	0	0.1	0	0	0	0	0.5	0	0.1	0	1	0	nd	1962	8	MTL	midpoint	1.12694	1.12694	-0.189448
1061	T-209	nydal 1962	2	Vest-agder; ravnemyr	58.0333	7.68333	1	7400	250	0	7400	250	7740	731	693	peat bog	1	5	peat slice	marine sediments	peat	negative	7.2	nd	nd	nd	nd	nd	nd	0	0.1	0	0	0	0	0.5	0	0.1	0	1	0	nd	1962	4	MTL	midpoint	1.12694	1.12694	-0.0965135
1062	T-281	nydal 1962 (as in Hafsten 1979 and 1983)	2	Vest-agder; ravnemyr	58.0333	7.68333	1	3050	100	0	3050	100	3308.5	505.5	457.5	peat bog	1	5	peat slice	peat	marine sediment	positive	2.2	nd	nd	nd	nd	nd	nd	0	0.1	0	0	0	0	0.5	0	0.1	0	1	0	nd	1962	4	MTL	midpoint	1.12694	1.12694	-0.0965135
1063	T-208	nydal 1962	2	Vest-agder; vaage spangereid	57.9833	7.06667	1	7950	170	0	7950	170	8951.5	488.5	541.5	peat bog	1	5	peat slice	peat	marine sediment	positive	3.5	nd	nd	nd	nd	nd	nd	0	0.1	0	0	0	0	0.5	0	0.1	0	1	0	nd	1962	0.5	MTL	midpoint	1.12694	1.12694	-0.180341
1064	T-273	nydal 1962	2	Hartmark; oftenes	58.0667	7.76667	1	8300	170	0	8300	170	9317	577	672	peat bog	1	5	peat slice	marine. Sediments	peat	positive	1.5	nd	nd	nd	nd	nd	nd	0	0.1	0	0	0	0	0.5	0	0.1	0	1	0	nd	1962	5	MTL	midpoint	1.12694	1.12694	-0.186001
1065	T-110	Nydal 1960	2	Troms; Breivikeid Stormo	69.5833	19.4	1	11500	400	0	11500	400	13768	1392	758	laminated clay	2	7	portlandia arctica and macoma calcarea	marine delta deposit	marine delta deposit	negative	4	nd	nd	nd	nd	nd	nd	0	0.1	0	0	0	0	0.8	0	0.1	0	1	0	nd	1958	60	MTL	midpoint	1.28841	1.28841	-0.186001
1066	T-112	Nydal 1960	2	Troms; Langnes end moraine	69.6667	18.9667	1	11500	400	0	11500	400	13067	1026	946	gravel bed	2	7	pecten islandicus mya truncata	bouldery till	glaciomarine gravel	negative	2.5	nd	nd	nd	nd	nd	nd	0	0.1	0	0	0	0	2	0	0.1	0	1	0	nd	1958	8	MTL	midpoint	2.24054	2.24054	-0.666976
1067	T-113	Nydal 1960	2	Troms; Tromso Tromsdal valley	69.6667	19	1	10200	350	0	10200	350	11525	1006	971	clay	2	7	arca glacialis mytilus edulis	sandy clay	marine clay	negative	nd	nd	nd	nd	nd	nd	nd	0	0.1	0	0	0	0	0.6	0	0.1	0	1	0	nd	1958	10	MTL	midpoint	1.17473	1.17473	-0.666976
1068	T-111	Nydal 1960	2	Troms; Tromso Tromsdal valley	68.6667	16.9167	1	10700	300	0	10700	300	12243	631	921	sand and gravel	2	7	pectin islandicus arctica islandica	nd	nd	nd	nd	nd	nd	nd	nd	nd	nd	0	0.1	0	0	0	0	2	0	0.1	0	1	0	nd	1958	nd	MTL	midpoint	2.24054	2.24054	-0.658242
1069	T-124	Nydal 1960	2	Helgeland; somna steinsdal	65.2833	12.15	1	10300	250	0	10300	250	11675.5	814.5	645.5	Yoldia clay	2	7	portlandia arctica	nd	moraine material	nd	nd	nd	nd	nd	nd	nd	nd	0	0.1	0	0	0	0	2	0	0.1	0	1	0	nd	1958	9	MTL	midpoint	2.24054	2.24054	-0.145269
1070	T-125	Nydal 1960	2	Troms Lyngen Birtavarre	69.6	20.8833	1	9880	240	0	9880	240	11283	712	767	glaciomarine sediment	2	7	mya truncata	nd	marine terrace sediment	nd	43	nd	nd	nd	nd	nd	nd	0	0.1	0	0	0	0	2	0	0.1	0	1	0	nd	1958	45	MTL	midpoint	2.24054	2.24054	-0.355996
1071	T-126	Nydal 1960 (also in Marthinussen 1962)	2	Seiland; Oldervik	70.2833	23.1	1	4820	160	0	4820	160	4690	510	443	peat bog	0	0	picea driftwood	bog Gyttja	nd	negative	nd	nd	nd	nd	nd	nd	nd	0	0.1	0	0	0	0	0.635228	0	0.1	0	1	0	nd	1938	15	MTL	midpoint	1.19311	1.19311	-0.355996
1072	T-118	Nydal 1960	2	Oslo; Teglverk Foss Ovre	59.9333	10.7667	1	9850	350	0	9850	350	12113.6	707.4	1321.6	superglacial marine deposit	2	7	arca glacialis shells	Arca clay	Arca clay	negative	nd	nd	nd	nd	nd	nd	nd	0	0.1	0	0	0	0	1.5	0	0.1	0	1	0	nd	1958	16.5	MTL	midpoint	1.80831	1.80831	-0.355996
1073	T-119	Nydal 1960	2	Oslo Skadalen	59.9667	10.6833	1	9350	200	0	9350	200	10311	661	650	gravel bed	2	7	shells	gravel	nd	negative	nd	nd	nd	nd	nd	nd	nd	0	0.1	0	0	0	0	2	0	0.1	0	1	0	nd	1909	221	MTL	midpoint	2.24054	2.24054	-0.355996
1074	T-120	Nydal 1960	2	Oslo Havnes Teglverk Akerselva	59.9333	10.7667	1	9100	180	0	9100	180	9959	529	512	Cardium clay	2	7	Arctica Cyprina islandica	nd	nd	negative	nd	nd	nd	nd	nd	nd	nd	0	0.1	0	0	0	0	2	0	0.1	0	1	0	nd	1959	100	MTL	midpoint	2.24054	2.24054	-0.355996
1075	T-117	Nydal 1960	2	Fredrikstad; Valle Teglverk	59.25	10.9667	1	9950	300	0	9950	300	11082	958	855	Yoldia clay	2	7	Portlandia Arctica	nd	nd	negative	nd	nd	nd	nd	nd	nd	nd	0	0.1	0	0	0	0	2	0	0.1	0	1	0	nd	1958	12.5	MTL	midpoint	2.24054	2.24054	-0.11777
1076	T-121	Nydal 1960	2	Fredrikstad; Valle Teglverk	59.25	10.9667	1	6570	150	0	6570	150	7109.5	343.5	409.5	Isocardia clay	2	7	Isocardia cor	nd	nd	negative	nd	nd	nd	nd	nd	nd	nd	0	0.1	0	0	0	0	2	0	0.1	0	1	0	nd	1958	20	MTL	midpoint	2.24054	2.24054	-0.0937733
1077	T-123	Nydal 1960 (also in Sorenson et al. 1999)	2	Fredrikstad; Breifjell. Krakeroy	59.1667	10.9	1	6850	170	0	6850	170	7381.5	377.5	418.5	marine facies	2	7	littorina littorea	nd	nd	negative	nd	nd	nd	nd	nd	nd	nd	0	0.1	0	0	0	0	2	0	0.1	0	1	0	nd	1958	50	MTL	midpoint	2.24054	2.24054	-0.16212
1078	T-89	Nydal 1960	2	Vestfold; Tjolling Holtantjern	59.2833	10.4667	1	2250	140	0	2250	140	1552.5	548.5	452.5	bog gyttja	1	5	gyttja	gyttja	marine sediments	negative	3.08	nd	nd	nd	nd	nd	nd	0	0.1	0	0	0	0	0.615031	0	0.1	0	1	0	nd	1958	11.5	MTL	midpoint	1.18248	1.18248	-1.13532
1079	T-91	Nydal 1960	2	Vestford Slagen Linnom	59.2833	10.4667	1	3400	135	0	3400	135	3623.25	718.75	385.25	bog gyttja	1	5	gyttja	gyttja	marine sediments	negative	4.78	nd	nd	nd	nd	nd	nd	0	0.1	0	0	0	0	0.763202	0	0.1	0	1	0	nd	1957	26.5	MTL	midpoint	1.26589	1.26589	-1.31232
1080	T-138	Nydal 1960	2	Hordaland; Blomvag Blomoy	60.5167	4.86667	1	12200	350	0	12200	350	14445.5	871.5	1092.5	fossil-bearing gravel	0	0	wood	mud and till	nd	negative	nd	nd	nd	nd	nd	nd	nd	0	0.1	0	0	0	0	0.62	0	0.1	0	1	0	nd	1941	12	MTL	midpoint	1.18507	1.18507	-0.146458
1081	T-139	Nydal 1960	2	Hordaland; Blomvag Blomoy	60.5167	4.86667	1	12700	350	0	12700	350	15670	1067	1343	fossil-bearing gravel	2	7	mytilus edulis	mud and till	nd	negative	nd	nd	nd	nd	nd	nd	nd	0	0.1	0	0	0	0	0.62	0	0.1	0	1	0	nd	1958	12	MTL	midpoint	1.18507	1.18507	-0.146458
1082	T-142	Nydal 1960	2	Bergen; Ulvenvann Os	60.1833	5.45	1	11500	300	0	11500	300	13054.5	719.5	590.5	glacial till	2	7	Mya truncata	glacial till	glacial till	negative	2	nd	nd	nd	nd	nd	nd	0	0.1	0	0	0	0	0.88	0	0.1	0	1	0	nd	1959	38	MTL	midpoint	1.33955	1.33955	-0.174494
1083	T-105	Nydal 1960	2	Rogaland; Jaeren Primstad	58.6667	5.7	1	11700	300	0	11700	300	12938	785	774	glacial till	1	5	humus	glacial till	glacial till	negative	nd	nd	nd	nd	nd	nd	nd	0	0.1	0	0	0	0	#VALUE!	0	0.1	0	1	0	nd	1956	nd	MTL	midpoint	#VALUE!	#VALUE!	-0.154773
1084	T-149	Nydal 1960 (also in Chanda 1965)	2	Rogaland; Jaeren Brondmyra	58.8	5.78333	1	13075	350	0	13075	350	15737.5	1180.5	1386.5	peat bog	1	5	gyttja with rootlets	lacustrine gyttja	clayey moraine	negative	1.15	0.01	nd	nd	nd	nd	nd	0	0.1	0	0	0	0	0.666744	0	0.1	0	1	0	nd	1958	17	MTL	midpoint	1.21019	1.21019	-0.175831
1085	T-150	Nydal 1960 (also in Chanda 1965)	2	Rogaland; Jaeren Brondmyra	58.8	5.78333	1	12650	350	0	12650	350	14906.5	1254.5	1097.5	peat bog	1	5	Brown gyttja	lacustrine gyttja	clayey moraine	negative	1.05	0.11	nd	nd	nd	nd	nd	0	0.1	0	0	0	0	0.666744	0	0.1	0	1	0	nd	1958	17	MTL	midpoint	1.21019	1.21019	-0.18909
1086	T-151	Nydal 1960 (also in Chanda 1965)	2	Rogaland; Jaeren Brondmyra	58.8	5.78333	1	11300	300	0	11300	300	13282.5	737.5	581.5	peat bog	1	5	Gray gyttja	lacustrine gyttja	clayey moraine	negative	0.95	0.21	nd	nd	nd	nd	nd	0	0.1	0	0	0	0	0.666744	0	0.1	0	1	0	nd	1958	17	MTL	midpoint	1.21019	1.21019	0
1087	T-152	Nydal 1960 (also in Chanda 1965)	2	Rogaland; Jaeren Brondmyra	58.8	5.78333	1	10800	300	0	10800	300	12687	771	926	peat bog	1	5	Gray gyttja	lacustrine gyttja	clayey moraine	negative	0.75	0.41	nd	nd	nd	nd	nd	0	0.1	0	0	0	0	0.666744	0	0.1	0	1	0	nd	1958	17	MTL	midpoint	1.21019	1.21019	0
1088	T-153	Nydal 1960 (also in Chanda 1965)	2	Rogaland; Jaeren Brondmyra	58.8	5.78333	1	9000	200	0	9000	200	10137.2	927.8	601.2	peat bog	1	5	Brown peat moss	lacustrine gyttja	clayey moraine	negative	nd	nd	nd	nd	nd	nd	nd	0	0.1	0	0	0	0	0.666744	0	0.1	0	1	0	nd	1958	17	MTL	midpoint	1.21019	1.21019	0
1089	T-107	Nydal 1960	2	Vest-Agder; Lyngdal Valley Bringsjord terrace	58.2	7.1	1	7780	190	0	7780	190	8801.08	592.917	428.083	marine gyttja	2	4	marine gyttja	marine gyttja	sandy and gravelly marine-delta terrace	negative	5	1	nd	nd	nd	nd	nd	0	0.1	0	0	0	0	0.5	0	0.1	0	1	0	nd	1958	0	MTL	midpoint	1.12694	1.12694	0
1090	T-156	Nydal 1960	2	Vest-Agder; Lista Nesheim	58.1333	6.66667	1	6420	160	0	6420	160	7073	429	512	sand	2	7	ostea edulis cardium edule littorina littorea	peat layers	marine sand	negative	6	1	nd	nd	nd	nd	nd	0	0.1	0	0	0	0	0.5	0	0.1	0	1	0	nd	1957	1	MTL	midpoint	1.12694	1.12694	0
1091	T-168	Nydal 1960	2	Ost-Agder; Tinsager near Lillesand	58.2667	8.33333	1	12550	200	0	12550	200	14182	501	753	glaciomarine clay	2	7	mytilus edulis macoma calcarea	clay	clay with erratics	negative	nd	nd	nd	nd	nd	nd	nd	0	0.1	0	0	0	0	0.85	0	0.1	0	1	0	nd	1959	35	MTL	midpoint	1.32004	1.32004	0
1092	T-50	nydal 1959	2	Troms; Bjorelvnes	69.3667	18.0833	1	10500	400	0	10500	400	12059.5	914.5	1263.5	wellsorted silt sand gravel beds	2	7	macoma calcarea	gravel and sand	gravel beds	negative	nd	nd	nd	nd	nd	nd	nd	nd	0.1	0	0	0	0	3	0	0.1	0	1	0	nd	1968	46	MTL	midpoint	3.16544	3.16544	0
1093	T-53	nydal 1959	2	Troms; Blinnfinnvan	69.0807	17.6867	1	10720	240	0	10720	240	11856	753	759	lacustrine gyttja	1	5	gyttja	gyttja	nd	nd	4	0	nd	nd	nd	nd	nd	nd	0.1	0	0	0	0	3	0	0.1	0	1	0	nd	1957	nd	MTL	midpoint	3.16544	3.16544	0
1094	T-80	nydal 1959	2	Vest-Agder; Hartmarksfjord	58.0333	7.63333	1	8770	100	0	8770	100	9991.75	297.25	503.75	peat	1	5	bulk peat	marine clay	peat	positive	nd	nd	nd	nd	nd	nd	nd	nd	0.1	0	0	0	0	0.5	0	0.1	0	1	0	nd	1957	2	MTL	midpoint	1.12694	1.12694	0
1095	T-81	nydal 1959	2	Vest-Agder; Hartmarksfjord	58.0333	7.63333	1	9410	220	0	9410	220	10749	931	787	peat	1	5	bulk peat	bulk peat	marine clay	negative	nd	nd	nd	nd	nd	nd	nd	nd	0.1	0	0	0	0	0.5	0	0.1	0	1	0	nd	1957	2	MTL	midpoint	1.12694	1.12694	0
1096	T-87	nydal 1959	2	Vestfold; Brunlanes Malerod-tjern	59.0833	10	1	9090	230	0	9090	230	10196.8	887.25	641.75	peat	1	5	bulk peat	lacustrine peat	marine sediment	negative	7.76	nd	nd	nd	0.11	nd	nd	nd	0.1	0	0	0	0	1.11913	0	0.1	0	1	0	nd	1957	124	MTL	midpoint	1.50747	1.50747	0
1097	T-88	nydal 1959	2	Vestfold; Brunlanes solum lake tjonna	59.0833	9.83333	1	8710	280	0	8710	280	9970.12	682.875	949.125	peat	1	5	bulk peat	lacustrine peat	marine sediment	negative	7.125	nd	nd	nd	0.15	nd	nd	nd	0.1	0	0	0	0	0.810002	0	0.1	0	1	0	nd	1957	62	MTL	midpoint	1.29464	1.29464	0
1098	T-90	nydal 1959	2	Vestfold; Sandar Napperod-tjern	59.1667	10.1667	1	4980	160	0	4980	160	5702.5	578.5	381.5	peat	1	5	bulk peat	lacustrine peat	marine sediment	negative	4.45	nd	nd	nd	2.2	nd	nd	nd	0.1	0	0	0	0	0.820005	0	0.1	0	1	0	nd	1957	32	MTL	midpoint	1.30093	1.30093	0
1099	T-98	nydal 1959	2	Oslo; Baerum smestad	59.9167	10.4667	1	7200	270	0	7200	270	7905	633	395	humus-rich layer	0	0	wood	sand	clay	negative	nd	nd	nd	nd	nd	nd	nd	nd	0.1	0	0	0	0	3	0	0.1	0	1	0	nd	1957	57	MTL	midpoint	3.16544	3.16544	0
[truncated: 35 more columns]

## Sheet: Radiocarbon
Unique sample ID	Laboratory code	Number of subsamples	Age (14C a BP)	Age uncertainty (14C a)	Bulk error (14C a)	δ13C (‰)	Assumed or measured	Isotopic fractionation correction (14C a)	Isotopic fractionation uncertainty (14C a)	Corrected age (14C a BP)	Corrected age uncertainty (14C a)	ΔR (14C a)	Reservoir age uncertainty (14C a)	Calibration software	Age (cal a BP)	Age 2σ Uncertainty + (cal a)	Age 2σ Uncertainty - (cal a)	Reject
1	2	3	4	5	6	7	8	9	10	11	12	13	14	15	16	17	18	19
1	Poz-119832	1	5285	35	0	nd	assumed	0	0	5285	35	0	0	Iosacal	6078.25	108.75	138.25	0
2	Poz-119833	1	5535	36	0	nd	assumed	0	0	5535	36	0	0	Iosacal	6343	54	58	0
3	Poz-108993	1	9610	37	0	nd	assumed	0	0	9610	37	0	0	Iosacal	10950.2	219.8	176.2	0
4	Poz-119899	1	9890	50	0	nd	assumed	0	0	9890	50	0	0	Iosacal	11277	324	76	0
5	Poz-119900	1	12090	60	0	nd	assumed	0	0	12090	60	0	0	Iosacal	13965	114	162	0
6	Poz-119901	1	13440	70	0	nd	assumed	0	0	13440	70	0	0	Iosacal	16196.5	213.5	240.5	0
7	Poz-119902	1	9830	50	0	nd	assumed	0	0	9830	50	0	0	Iosacal	11231	159	53	0
8	Poz-119903	1	11850	60	0	nd	assumed	0	0	11850	60	0	0	Iosacal	13685.2	287.833	171.167	0
9	Poz-119905	1	11960	60	0	nd	assumed	0	0	11960	60	0	0	Iosacal	13869.3	164.667	257.333	0
10	Poz-119906	1	12380	60	0	nd	assumed	0	0	12380	60	0	0	Iosacal	14583.8	277.25	423.75	0
11	Poz-119907	1	13500	70	0	nd	assumed	0	0	13500	70	0	0	Iosacal	16275.5	237.5	234.5	1
12	Poz-119908	1	13380	90	0	nd	assumed	0	0	13380	90	0	0	Iosacal	16108.5	250.5	299.5	0
13	Poz-109217	1	8510	38	0	nd	assumed	0	0	8510	38	0	0	Iosacal	9515	26	45	0
14	Poz-108993	1	9610	39	0	nd	assumed	0	0	9610	39	0	0	Iosacal	10960.4	209.625	187.375	0
15	Poz-110093	1	7020	40	0	nd	assumed	0	0	7020	40	0	0	Iosacal	7854.83	83.1667	108.833	0
16	Poz-110136	1	4835	41	0	nd	assumed	0	0	4835	41	0	0	Iosacal	5541	110	67	0
17	Poz-86910	1	1760	42	0	nd	assumed	0	0	1760	42	0	0	Iosacal	1662.67	61.3333	116.667	0
18	Poz-86897	1	1750	43	0	nd	assumed	0	0	1750	43	0	0	Iosacal	1660.33	56.6667	118.333	0
19	Poz-86869	1	2170	44	0	nd	assumed	0	0	2170	44	0	0	Iosacal	2203.5	110.5	197.5	0
20	Beta-439746	1	13300	45	0	nd	assumed	0	0	13300	45	0	0	Iosacal	15984.5	175.5	178.5	0
21	Beta-419386	1	15190	50	0	nd	assumed	0	0	15190	50	0	0	Iosacal	18473	188	189	0
22	Beta-415029	1	6570	30	0	nd	assumed	0	0	6570	30	0	0	Iosacal	7444.25	115.75	17.25	0
23	Beta-415028	1	6140	30	0	nd	assumed	0	0	6140	30	0	0	Iosacal	7033.17	123.833	86.1667	0
24	Beta-458883	1	6440	30	0	nd	assumed	0	0	6440	30	0	0	Iosacal	7372.5	51.5	90.5	0
25	Beta-458884	1	6400	30	0	nd	assumed	0	0	6400	30	0	0	Iosacal	7337.33	83.6667	75.3333	0
26	Beta-458885	1	6740	30	0	nd	assumed	0	0	6740	30	0	0	Iosacal	7593.5	70.5	73.5	0
27	Beta-458886	1	6880	30	0	nd	assumed	0	0	6880	30	0	0	Iosacal	7697	92	74	0
28	Beta-458882	1	6220	30	0	nd	assumed	0	0	6220	30	0	0	Iosacal	7129.25	119.75	125.25	0
29	Beta-415030	1	6520	30	0	nd	assumed	0	0	6520	30	0	0	Iosacal	7418.33	86.6667	87.3333	0
30	Beta-415031	1	6480	30	0	nd	assumed	0	0	6480	30	0	0	Iosacal	7378.5	49.5	56.5	0
31	Beta-389722	1	6680	30	0	nd	assumed	0	0	6680	30	0	0	Iosacal	7547.5	59.5	60.5	0
32	Beta-389720	1	6160	30	0	nd	assumed	0	0	6160	30	0	0	Iosacal	7086.62	72.375	125.625	0
33	Beta-389721	1	6070	30	0	nd	assumed	0	0	6070	30	0	0	Iosacal	6921.5	227.5	122.5	0
34	Beta-458888	1	6310	30	0	nd	assumed	0	0	6310	30	0	0	Iosacal	7221	84	57	0
35	Beta-428849	1	5150	30	0	nd	assumed	0	0	5150	30	0	0	Iosacal	5916.5	74.5	158.5	0
36	Beta-428850	1	6020	30	0	nd	assumed	0	0	6020	30	0	0	Iosacal	6837.75	109.25	84.75	0
37	Beta-458899	1	5830	30	0	nd	assumed	0	0	5830	30	0	0	Iosacal	6611.75	125.25	102.75	0
38	Beta-458900	1	6500	30	0	nd	assumed	0	0	6500	30	0	0	Iosacal	7379.17	96.8333	54.1667	0
39	Beta-472532	1	6050	30	0	nd	assumed	0	0	6050	30	0	0	Iosacal	6887.25	96.75	91.25	0
40	Beta-472533	1	6270	30	0	nd	assumed	0	0	6270	30	0	0	Iosacal	7197.75	68.25	163.75	0
41	Beta-472534	1	6180	30	0	nd	assumed	0	0	6180	30	0	0	Iosacal	7106.5	57.5	141.5	0
42	Beta-472535	1	6140	30	0	nd	assumed	0	0	6140	30	0	0	Iosacal	7033.17	123.833	86.1667	0
43	Beta-472536	1	6160	30	0	nd	assumed	0	0	6160	30	0	0	Iosacal	7086.62	72.375	125.625	0
44	Beta-472527	1	6100	30	0	nd	assumed	0	0	6100	30	0	0	Iosacal	7055	100	199	0
45	Beta-472528	1	6080	30	0	nd	assumed	0	0	6080	30	0	0	Iosacal	6926.5	224.5	125.5	0
46	Beta-472529	1	5420	30	0	nd	assumed	0	0	5420	30	0	0	Iosacal	6241.5	49.5	116.5	0
47	Beta-472530	1	5250	30	0	nd	assumed	0	0	5250	30	0	0	Iosacal	6015.5	160.5	87.5	0
48	Beta-472531	1	5460	30	0	nd	assumed	0	0	5460	30	0	0	Iosacal	6254.75	49.25	54.75	0
49	Beta-428843	1	6230	40	0	nd	assumed	0	0	6230	40	0	0	Iosacal	7129.12	124.875	125.125	0
50	Beta-389708	1	4730	30	0	nd	assumed	0	0	4730	30	0	0	Iosacal	5431.5	147.5	104.5	0
51	Beta-389704	1	5230	30	0	nd	assumed	0	0	5230	30	0	0	Iosacal	5972.75	198.25	57.75	0
52	Beta-389705	1	5220	30	0	nd	assumed	0	0	5220	30	0	0	Iosacal	5965.83	201.167	53.8333	0
53	Beta-428841	1	5250	30	0	nd	assumed	0	0	5250	30	0	0	Iosacal	6015.5	160.5	87.5	0
54	Beta-428842	1	5250	30	0	nd	assumed	0	0	5250	30	0	0	Iosacal	6015.5	160.5	87.5	0
55	Beta-389706	1	5800	30	0	nd	assumed	0	0	5800	30	0	0	Iosacal	6607.67	60.3333	108.667	0
56	Beta-389709	1	6140	30	0	nd	assumed	0	0	6140	30	0	0	Iosacal	7033.17	123.833	86.1667	0
57	Beta-428853	1	5330	30	0	nd	assumed	0	0	5330	30	0	0	Iosacal	6108.2	154.8	108.2	0
58	Beta-431633	1	6440	30	0	nd	assumed	0	0	6440	30	0	0	Iosacal	7372.5	51.5	90.5	0
59	Beta-389711	1	4830	30	0	nd	assumed	0	0	4830	30	0	0	Iosacal	5540.5	58.5	62.5	0
60	Beta-389712	1	6110	30	0	nd	assumed	0	0	6110	30	0	0	Iosacal	7056.75	99.25	168.75	0
61	Beta-428846	1	6560	40	0	nd	assumed	0	0	6560	40	0	0	Iosacal	7444	122	77	0
62	Beta-428844	1	7010	30	0	nd	assumed	0	0	7010	30	0	0	Iosacal	7853.5	78.5	101.5	0
63	Beta-428847	1	5980	30	0	nd	assumed	0	0	5980	30	0	0	Iosacal	6793.67	138.333	59.6667	0
64	Beta-468567	1	6500	30	0	nd	assumed	0	0	6500	30	0	0	Iosacal	7379.17	96.8333	54.1667	0
65	Beta-428845	1	6870	40	0	nd	assumed	0	0	6870	40	0	0	Iosacal	7697	93	83	0
66	Beta-428851	1	6130	30	0	nd	assumed	0	0	6130	30	0	0	Iosacal	7061.75	95.25	153.75	0
67	Beta-428852	1	6100	30	0	nd	assumed	0	0	6100	30	0	0	Iosacal	7055	100	199	0
68	Beta-458901	1	6070	30	0	nd	assumed	0	0	6070	30	0	0	Iosacal	6921.5	227.5	122.5	0
69	Beta-458894	1	6120	30	0	nd	assumed	0	0	6120	30	0	0	Iosacal	7058.5	97.5	161.5	0
70	Beta-458895	1	6360	30	0	nd	assumed	0	0	6360	30	0	0	Iosacal	7286.75	129.25	116.75	0
71	Beta-458896	1	6320	30	0	nd	assumed	0	0	6320	30	0	0	Iosacal	7222	89	56	0
72	Beta-458897	1	6450	30	0	nd	assumed	0	0	6450	30	0	0	Iosacal	7384.17	41.8333	74.1667	0
73	Beta-458898	1	6480	30	0	nd	assumed	0	0	6480	30	0	0	Iosacal	7378.5	49.5	56.5	0
74	Beta-389714	1	6560	30	0	nd	assumed	0	0	6560	30	0	0	Iosacal	7444.25	114.75	19.25	0
75	Beta-389713	1	6210	30	0	nd	assumed	0	0	6210	30	0	0	Iosacal	7095.5	150.5	96.5	0
76	Beta-468571	1	6630	30	0	nd	assumed	0	0	6630	30	0	0	Iosacal	7529.5	42.5	97.5	0
77	Beta-389715	1	4020	30	0	nd	assumed	0	0	4020	30	0	0	Iosacal	4478.67	91.3333	61.6667	0
78	Beta-389716	1	6570	30	0	nd	assumed	0	0	6570	30	0	0	Iosacal	7444.25	115.75	17.25	0
79	Beta-389717	1	6540	30	0	nd	assumed	0	0	6540	30	0	0	Iosacal	7443.75	116.25	82.75	0
80	Beta-415035	1	6550	30	0	nd	assumed	0	0	6550	30	0	0	Iosacal	7443.75	116.25	20.75	0
81	Beta-468568	1	6570	30	0	nd	assumed	0	0	6570	30	0	0	Iosacal	7444.25	115.75	17.25	0
82	Beta-389718	1	6330	30	0	nd	assumed	0	0	6330	30	0	0	Iosacal	7224	94	58	0
83	Beta-389719	1	6340	30	0	nd	assumed	0	0	6340	30	0	0	Iosacal	7225.75	97.25	59.75	0
84	Beta-468572	1	6530	30	0	nd	assumed	0	0	6530	30	0	0	Iosacal	7443.25	111.75	108.25	0
85	Beta-468570	1	6650	30	0	nd	assumed	0	0	6650	30	0	0	Iosacal	7538.33	39.6667	104.333	0
86	Beta-468569	1	6740	30	0	nd	assumed	0	0	6740	30	0	0	Iosacal	7593.5	70.5	73.5	0
87	Beta-415036	1	6450	30	0	nd	assumed	0	0	6450	30	0	0	Iosacal	7384.17	41.8333	74.1667	0
88	Beta-415037	1	6360	30	0	nd	assumed	0	0	6360	30	0	0	Iosacal	7286.75	129.25	116.75	0
89	Beta-458891	1	4840	30	0	nd	assumed	0	0	4840	30	0	0	Iosacal	5542	106	64	0
90	Beta-458892	1	6360	30	0	nd	assumed	0	0	6360	30	0	0	Iosacal	7286.75	129.25	116.75	0
91	Beta-458887	1	6130	30	0	nd	assumed	0	0	6130	30	0	0	Iosacal	7061.75	95.25	153.75	0
92	Beta-428840	1	6730	30	0	nd	assumed	0	0	6730	30	0	0	Iosacal	7590	72	73	0
93	Beta-428839	1	5680	30	0	nd	assumed	0	0	5680	30	0	0	Iosacal	6439.75	112.25	41.75	0
94	Beta-427476	1	5520	30	100	nd	assumed	0	0	5520	104.403	0	0	Iosacal	6281.5	266.5	277.5	0
95	Beta-427479	1	6710	30	100	nd	assumed	0	0	6710	104.403	0	0	Iosacal	7588.33	190.667	165.333	0
96	Beta-446626	1	7430	30	100	nd	assumed	0	0	7430	104.403	0	0	Iosacal	8257.5	144.5	232.5	0
97	Beta-427478	1	8290	30	100	nd	assumed	0	0	8290	104.403	0	0	Iosacal	9262.25	219.75	243.25	0
98	Beta-482271	1	5620	30	100	nd	assumed	0	0	5620	104.403	0	0	Iosacal	6379.5	280.5	171.5	0
99	Beta-482272	1	6210	30	100	nd	assumed	0	0	6210	104.403	0	0	Iosacal	7152	259	353	0
100	Beta-427477	1	6810	30	100	nd	assumed	0	0	6810	104.403	0	0	Iosacal	7636.5	280.5	156.5	0
101	Beta-428312	1	6930	30	100	nd	assumed	0	0	6930	104.403	0	0	Iosacal	7780.75	163.25	196.75	0
102	Beta-446625	1	7720	30	100	nd	assumed	0	0	7720	104.403	0	0	Iosacal	8532.5	441.5	202.5	0
103	Beta-446624	1	8430	30	100	nd	assumed	0	0	8430	104.403	0	0	Iosacal	9404.75	149.25	369.75	0
104	Beta-428313	1	8460	30	100	nd	assumed	0	0	8460	104.403	0	0	Iosacal	9480	181	344	0
105	Beta-427480	1	9230	30	100	nd	assumed	0	0	9230	104.403	0	0	Iosacal	10389.8	289.167	171.833	0
106	NOSAMS-23817a	1	6720	30	0	nd	assumed	0	0	6720	30	0	0	Iosacal	7591.5	69.5	78.5	0
107	NOSAMS-23817b	1	4620	20	0	nd	assumed	0	0	4620	20	0	0	Iosacal	5373.25	71.75	66.25	0
108	C1-C7	1	n/a	n/a	0	nd	assumed	0	0	0	0	0	0	Iosacal	n/a	n/a	n/a	0
109	C8-C9	1	n/a	n/a	0	nd	assumed	0	0	0	0	0	0	Iosacal	n/a	n/a	n/a	0
110	Tua-5647	1	8700	55	0	nd	assumed	0	0	8700	55	0	0	Iosacal	9601.25	288.75	59.25	0
111	Tua-5646	1	8250	50	0	nd	assumed	0	0	8250	50	0	0	Iosacal	9215	201	187	0
112	Ua-44731	1	6094	41	0	nd	assumed	0	0	6094	41	0	0	Iosacal	6937.25	218.75	137.25	0
113	Ua-44730	1	5929	41	0	nd	assumed	0	0	5929	41	0	0	Iosacal	6723.5	156.5	60.5	0
114	Ua-44733	1	9215	57	0	nd	assumed	0	0	9215	57	0	0	Iosacal	10386	168	143	0
115	Ua-44732	1	8655	54	0	nd	assumed	0	0	8655	54	0	0	Iosacal	9603	278	71	0
116	Poz-80678	1	10020	60	0	nd	assumed	0	0	10020	60	0	0	Iosacal	11528.6	271.375	256.625	0
117	Poz-71590	1	9510	50	0	nd	assumed	0	0	9510	50	0	0	Iosacal	10925.5	151.5	337.5	0
118	Poz-71595	1	9470	50	0	nd	assumed	0	0	9470	50	0	0	Iosacal	10657.8	410.25	85.75	0
119	Poz-71596	1	9530	50	0	nd	assumed	0	0	9530	50	0	0	Iosacal	10913.2	180.75	253.25	0
120	Poz-72460	1	9100	50	0	nd	assumed	0	0	9100	50	0	0	Iosacal	10254	222	68	0
121	Poz-72462	1	9840	50	0	nd	assumed	0	0	9840	50	0	0	Iosacal	11237	155	52	0
122	Poz-73672	1	9590	50	0	nd	assumed	0	0	9590	50	0	0	Iosacal	10967.4	194.625	220.375	0
123	Poz-72443	1	9390	60	0	nd	assumed	0	0	9390	60	0	0	Iosacal	10646	347	226	0
124	Poz-72450	1	9260	60	0	nd	assumed	0	0	9260	60	0	0	Iosacal	10375.8	198.25	121.75	0
125	Poz-72457	1	9220	50	0	nd	assumed	0	0	9220	50	0	0	Iosacal	10380.5	166.5	134.5	0
126	Poz-71602	1	9290	50	0	nd	assumed	0	0	9290	50	0	0	Iosacal	10498.3	149.667	212.333	0
127	Poz-73675	1	8620	50	0	nd	assumed	0	0	8620	50	0	0	Iosacal	9595	104	102	0
128	Poz-73676	1	9590	50	0	nd	assumed	0	0	9590	50	0	0	Iosacal	10967.4	194.625	220.375	0
129	Poz-72265	1	9010	50	0	nd	assumed	0	0	9010	50	0	0	Iosacal	10205.5	41.5	287.5	0
130	Poz-73618	1	9030	50	0	nd	assumed	0	0	9030	50	0	0	Iosacal	10213.5	61.5	290.5	0
131	Poz-80668	1	8640	50	0	nd	assumed	0	0	8640	50	0	0	Iosacal	9596	136	66	0
132	Poz-73620	1	8420	40	0	nd	assumed	0	0	8420	40	0	0	Iosacal	9457.5	72.5	143.5	0
133	Poz-73680	1	8510	50	0	nd	assumed	0	0	8510	50	0	0	Iosacal	9514.5	30.5	69.5	0
134	Poz-73679	1	7920	50	0	nd	assumed	0	0	7920	50	0	0	Iosacal	8776.25	206.75	176.25	0
135	Poz-82912	1	6590	40	0	nd	assumed	0	0	6590	40	0	0	Iosacal	7462.75	104.25	35.75	0
136	Poz-71613	1	6240	40	0	nd	assumed	0	0	6240	40	0	0	Iosacal	7159.5	97.5	149.5	0
137	Poz-72261	1	5255	35	0	nd	assumed	0	0	5255	35	0	0	Iosacal	6052	126	123	0
138	Poz-71535	1	3720	35	0	nd	assumed	0	0	3720	35	0	0	Iosacal	4078.33	141.667	146.333	0
139	Poz-71605	1	2440	30	0	nd	assumed	0	0	2440	30	0	0	Iosacal	2526	173	169	0
140	Beta-461937	1	12180	40	0	nd	assumed	0	0	12180	40	0	0	Iosacal	14075.5	221.5	194.5	0
141	Beta-439744	1	10550	30	0	nd	assumed	0	0	10550	30	0	0	Iosacal	12565.2	113.75	82.25	0
142	Poz-86475	1	9890	60	0	nd	assumed	0	0	9890	60	0	0	Iosacal	11332.2	274.75	135.25	0
143	Poz-86485	1	11940	60	0	nd	assumed	0	0	11940	60	0	0	Iosacal	13865	158	256	0
144	Poz-86484	1	11290	50	0	nd	assumed	0	0	11290	50	0	0	Iosacal	13173.3	123.667	73.3333	0
145	Poz-86477	1	9940	50	0	nd	assumed	0	0	9940	50	0	0	Iosacal	11345.2	335.75	106.25	0
146	LuS-5950	1	12405	70	0	0	measured	0	0	12405	70	-149.387	33.4392	Iosacal	13326	550	255	0
147	LuS-5949	1	11990	70	0	0	measured	0	0	11990	70	-149.387	33.4392	Iosacal	13158.5	215.5	208.5	0
148	LuS-5948	1	11485	80	0	0	measured	0	0	11485	80	-149.387	33.4392	Iosacal	12679.5	205.5	202.5	0
149	LuS-5946	1	11195	160	0	0	measured	0	0	11195	160	0	0	Iosacal	13153.5	241.5	391.5	0
150	LuS-5945	1	10750	70	0	0	measured	0	0	10750	70	0	0	Iosacal	12730	94	108	0
151	LuS-5944	1	10645	100	0	0	measured	0	0	10645	100	0	0	Iosacal	12672	144	479	0
152	LuS-5943	1	10560	60	0	0	measured	0	0	10560	60	0	0	Iosacal	12595.8	125.167	314.833	0
153	LuS-5941	1	9865	70	0	0	measured	0	0	9865	70	0	0	Iosacal	11276.5	332.5	101.5	0
154	LuS-5940	1	10120	60	0	0	measured	0	0	10120	60	0	0	Iosacal	11679.8	254.167	277.833	0
155	LuS-5939	1	9905	100	0	0	measured	0	0	9905	100	0	0	Iosacal	11384.5	364.5	210.5	0
156	LuS-5938	1	9950	400	0	0	measured	0	0	9950	400	0	0	Iosacal	11212.8	1487.25	791.75	0
157	LuS-5937	1	9520	60	0	0	measured	0	0	9520	60	0	0	Iosacal	10910.1	187.875	319.125	0
158	Poz-52955	1	3610	50	0	nd	assumed	0	0	3610	50	0	0	Iosacal	3931	154	203	0
159	Poz-52936	1	7390	50	0	nd	assumed	0	0	7390	50	0	0	Iosacal	8239.25	100.75	202.25	0
160	Ua-44699	1	5202	45	0	nd	assumed	0	0	5202	45	0	0	Iosacal	5955.75	220.25	60.75	0
161	Ua-44703	1	6681	41	0	nd	assumed	0	0	6681	41	0	0	Iosacal	7548.25	102.75	114.25	0
162	Ua-44693	1	3179	55	0	nd	assumed	0	0	3179	55	0	0	Iosacal	3412.75	135.25	170.75	0
163	Tra-3075	1	7810	45	0	nd	assumed	0	0	7810	45	0	0	Iosacal	8600	121	153	0
164	Tra-3074	1	1545	30	0	nd	assumed	0	0	1545	30	0	0	Iosacal	1455.17	60.8333	98.1667	0
165	Tra-3082	1	1785	30	0	nd	assumed	0	0	1785	30	0	0	Iosacal	1674	65	84	0
166	Tra-3083	1	1785	30	0	nd	assumed	0	0	1785	30	0	0	Iosacal	1674	65	84	0
167	Ua-44692	1	9790	67	0	nd	assumed	0	0	9790	67	0	0	Iosacal	11216.5	176.5	338.5	0
168	Barn15_01	1	n/a	n/a	n/a	n/a	n/a	n/a	n/a	n/a	n/a	n/a	n/a	n/a	n/a	n/a	n/a	n/a
169	Barn15_02	1	n/a	n/a	n/a	n/a	n/a	n/a	n/a	n/a	n/a	n/a	n/a	n/a	n/a	n/a	n/a	n/a
170	Barn15_03	1	n/a	n/a	n/a	n/a	n/a	n/a	n/a	n/a	n/a	n/a	n/a	n/a	n/a	n/a	n/a	n/a
171	Barn15_04	1	n/a	n/a	n/a	n/a	n/a	n/a	n/a	n/a	n/a	n/a	n/a	n/a	n/a	n/a	n/a	n/a
172	Barn15_05	1	n/a	n/a	n/a	n/a	n/a	n/a	n/a	n/a	n/a	n/a	n/a	n/a	n/a	n/a	n/a	n/a
173	Barn15_06	1	n/a	n/a	n/a	n/a	n/a	n/a	n/a	n/a	n/a	n/a	n/a	n/a	n/a	n/a	n/a	n/a
174	Barn15_07	1	n/a	n/a	n/a	n/a	n/a	n/a	n/a	n/a	n/a	n/a	n/a	n/a	n/a	n/a	n/a	n/a
175	Barn15_08	1	n/a	n/a	n/a	n/a	n/a	n/a	n/a	n/a	n/a	n/a	n/a	n/a	n/a	n/a	n/a	n/a
176	Barn15_09	1	n/a	n/a	n/a	nd	n/a	n/a	n/a	n/a	n/a	n/a	n/a	n/a	n/a	n/a	n/a	n/a
177	Barn15_10	1	n/a	n/a	n/a	nd	n/a	n/a	n/a	n/a	n/a	n/a	n/a	n/a	n/a	n/a	n/a	n/a
178	Barn15_11	1	n/a	n/a	n/a	nd	n/a	n/a	n/a	n/a	n/a	n/a	n/a	n/a	n/a	n/a	n/a	n/a
179	Barn15_12	1	n/a	n/a	n/a	nd	n/a	n/a	n/a	n/a	n/a	n/a	n/a	n/a	n/a	n/a	n/a	n/a
180	Barn15_13	1	n/a	n/a	n/a	nd	n/a	n/a	n/a	n/a	n/a	n/a	n/a	n/a	n/a	n/a	n/a	n/a
181	Barn15_14	1	n/a	n/a	n/a	nd	n/a	n/a	n/a	n/a	n/a	n/a	n/a	n/a	n/a	n/a	n/a	n/a
182	Barn15_15	1	n/a	n/a	n/a	nd	n/a	n/a	n/a	n/a	n/a	n/a	n/a	n/a	n/a	n/a	n/a	n/a
183	Barn15_16	1	n/a	n/a	n/a	nd	n/a	n/a	n/a	n/a	n/a	n/a	n/a	n/a	n/a	n/a	n/a	n/a
184	Barn15_17	1	n/a	n/a	n/a	nd	n/a	n/a	n/a	n/a	n/a	n/a	n/a	n/a	n/a	n/a	n/a	n/a
185	SUERC-39977	1	2140	37	0	nd	assumed	0	0	2140	37	0	0	Iosacal	2159.33	141.667	160.333	0
186	SUERC-39980	2	2279	35	0	nd	assumed	0	0	2279	35	0	0	Iosacal	2243.83	105.167	86.8333	0
187	SUERC-39981	3	2634	35	0	nd	assumed	0	0	2634	35	0	0	Iosacal	2750.5	94.5	28.5	0
188	SUERC-34686	4	2437	37	0	nd	assumed	0	0	2437	37	0	0	Iosacal	2524.5	176.5	169.5	0
189	SUERC-39987	5	2777	36	0	nd	assumed	0	0	2777	36	0	0	Iosacal	2861.83	95.1667	80.8333	0
190	SUERC-41146	6	3020	35	0	nd	assumed	0	0	3020	35	0	0	Iosacal	3258.5	85.5	181.5	0
191	UBA-21511	7	8590	45	100	nd	assumed	0	0	8590	109.659	0	0	Iosacal	9575.5	535.5	264.5	0
192	TRa-3004A	8	8075	60	100	nd	assumed	0	0	8075	116.619	0	0	Iosacal	8960.21	434.786	359.214	0
193	Beta-301230	9	6560	40	100	nd	assumed	0	0	6560	107.703	0	0	Iosacal	7509.25	144.75	248.25	0
194	UBA-19961	10	6090	30	100	nd	assumed	0	0	6090	104.403	0	0	Iosacal	6960.17	288.833	282.167	0
195	UBA-19962	11	5485	35	100	nd	assumed	0	0	5485	105.948	0	0	Iosacal	6308.88	178.125	308.875	0
196	TRa-3002A	12	5200	40	100	nd	assumed	0	0	5200	107.703	0	0	Iosacal	6066	207	401	0
197	TRa-3445A	13	4260	50	100	nd	assumed	0	0	4260	111.803	0	0	Iosacal	4784.42	491.583	338.417	0
198	UBA-20321	14	3815	30	100	nd	assumed	0	0	3815	104.403	0	0	Iosacal	4222.67	292.333	314.667	0
199	TRa-3007A	15	2910	30	100	nd	assumed	0	0	2910	104.403	0	0	Iosacal	3072.75	269.25	286.75	0
200	TRa-3008A	16	2790	30	100	nd	assumed	0	0	2790	104.403	0	0	Iosacal	2853.5	353.5	116.5	0
201	TRa-3005A	17	2460	40	100	nd	assumed	0	0	2460	107.703	0	0	Iosacal	2549.75	211.25	364.75	0
202	TRa-3006A	18	1310	25	100	nd	assumed	0	0	1310	103.078	0	0	Iosacal	1196.75	185.25	221.75	0
203	T-1380	19	1140	40	100	nd	assumed	0	0	1140	107.703	0	0	Iosacal	1098.17	187.833	298.167	0
204	Tua-4218A	20	800	30	100	nd	assumed	0	0	800	104.403	0	0	Iosacal	752.167	171.833	196.167	0
205	Poz-32347	21	8480	40	0	nd	assumed	0	0	8480	40	0	0	Iosacal	9502.75	34.25	59.75	0
206	Beta-319730	22	7340	40	0	nd	assumed	0	0	7340	40	0	0	Iosacal	8123	166	100	0
207	OS-67689	23	1760	30	0	-26.52	measured	0	0	1760	30	0	0	Iosacal	1663	53	93	0
208	OS-67681	24	3610	35	0	-24.39	measured	0	0	3610	35	0	0	Iosacal	3931.75	143.25	99.75	0
209	Beta-241113	25	4550	40	0	n/a	measured	0	0	4550	40	0	0	Iosacal	5178.33	254.667	129.333	0
210	OS-67690	26	5260	35	0	-24.46	measured	0	0	5260	35	0	0	Iosacal	6052	127	119	0
211	Beta-241115	27	7350	50	0	-1.5	measured	0	0	7350	50	0	0	Iosacal	8123.33	194.667	99.3333	0
212	TUa-5257A	28	9575	60	0	nd	assumed	0	0	9575	60	0	0	Iosacal	10271	234	170	0
213	TUa-5258A	29	8830	50	0	nd	assumed	0	0	8830	50	0	0	Iosacal	9952	203	262	0
214	Beta-220863	30	9040	60	0	nd	assumed	0	0	9040	60	0	0	Iosacal	10215	154	300	0
215	Beta-220864	31	8340	50	0	nd	assumed	0	0	8340	50	0	0	Iosacal	9375.33	102.667	233.333	0
216	Beta-222020	32	5730	40	0	nd	assumed	0	0	5730	40	0	0	Iosacal	6491.25	144.75	83.25	0
217	Beta-222021	33	5340	40	0	nd	assumed	0	0	5340	40	0	0	Iosacal	6103.88	167.125	104.875	0
218	Beta-199973	34	8450	40	0	nd	assumed	0	0	8450	40	0	0	Iosacal	9497.75	37.25	165.75	0
219	Beta-199972	35	5510	40	0	nd	assumed	0	0	5510	40	0	0	Iosacal	6339.5	55.5	126.5	0
220	TUa-5261A	36	2265	40	0	nd	assumed	0	0	2265	40	0	0	Iosacal	2242.5	105.5	90.5	0
221	Beta-220862	37	10510	60	0	nd	assumed	0	0	10510	60	0	0	Iosacal	12532	163	427	0
222	TUa-7696	38	9838	55	0	nd	assumed	0	0	9838	55	0	0	Iosacal	11235.5	159.5	58.5	0
223	TUa-7697	39	9838	55	0	nd	assumed	0	0	9838	55	0	0	Iosacal	11235.5	159.5	58.5	0
224	TUa-7695	40	9624	48	0	nd	assumed	0	0	9624	48	0	0	Iosacal	10991.9	188.125	219.875	0
225	TUa-7692	41	4460	37	0	nd	assumed	0	0	4460	37	0	0	Iosacal	5096.12	195.875	177.125	0
226	TUa-7694	42	7123	41	0	nd	assumed	0	0	7123	41	0	0	Iosacal	7917.75	100.25	58.75	0
227	TUa-7103	43	9719	53	0	nd	assumed	0	0	9719	53	0	0	Iosacal	11147	96	338	0
228	TUa-7106	44	5689	35	0	nd	assumed	0	0	5689	35	0	0	Iosacal	6440.75	179.25	44.75	0
229	TUa-7108	45	7238	42	0	nd	assumed	0	0	7238	42	0	0	Iosacal	8066.5	103.5	96.5	0
230	Tra-404	46	7238	42	0	nd	assumed	0	0	7238	42	0	0	Iosacal	8066.5	103.5	96.5	0
231	TUa-7700	47	9347	56	0	nd	assumed	0	0	9347	56	0	0	Iosacal	10591.5	123.5	282.5	0
232	TUa-7699	48	9377	46	0	nd	assumed	0	0	9377	46	0	0	Iosacal	10581.5	142.5	142.5	0
233	TUa-7704	49	4591	42	0	nd	assumed	0	0	4591	42	0	0	Iosacal	5294.5	167.5	241.5	0
234	TUa-7707	50	8713	64	0	nd	assumed	0	0	8713	64	0	0	Iosacal	9605	299	66	0
235	Poz-14253	51	9770	50	0	nd	assumed	0	0	9770	50	0	0	Iosacal	11210.5	56.5	310.5	0
236	Poz-14618	52	9780	50	0	nd	assumed	0	0	9780	50	0	0	Iosacal	11213.5	59.5	114.5	0
237	Poz-14247	53	8990	50	0	nd	assumed	0	0	8990	50	0	0	Iosacal	10194.5	46.5	280.5	0
238	Poz-14248	54	9350	50	0	nd	assumed	0	0	9350	50	0	0	Iosacal	10592.2	114.75	185.25	0
239	Poz-14249	55	9680	50	0	nd	assumed	0	0	9680	50	0	0	Iosacal	11024.5	188.5	231.5	0
240	Poz-14251	56	9620	50	0	nd	assumed	0	0	9620	50	0	0	Iosacal	10961.8	217.25	193.75	0
241	Poz-14252	57	9800	50	0	nd	assumed	0	0	9800	50	0	0	Iosacal	11220.5	97.5	73.5	0
242	Poz-14173	58	10360	50	0	nd	assumed	0	0	10360	50	0	0	Iosacal	12237.5	234.5	265.5	0
243	Poz-13274	59	2505	35	0	nd	assumed	0	0	2505	35	-148.511	32.8303	Iosacal	1798.5	184.5	172.5	0
244	Poz-13275	60	5700	40	0	nd	assumed	0	0	5700	40	0	0	Iosacal	6442.75	182.25	43.75	0
245	Poz-13277	61	8820	50	0	nd	assumed	0	0	8820	50	0	0	Iosacal	9966	190	287	1
246	Poz-13276	62	6480	40	0	nd	assumed	0	0	6480	40	0	0	Iosacal	7392	81	107	0
247	Poz-8081	63	8840	50	0	nd	assumed	0	0	8840	50	0	0	Iosacal	9951.4	205.6	251.4	0
248	Poz-8088	64	8840	50	0	nd	assumed	0	0	8840	50	0	0	Iosacal	9951.4	205.6	251.4	0
249	Poz-8080	65	8900	50	0	nd	assumed	0	0	8900	50	0	0	Iosacal	10010.1	185.9	228.1	0
250	Poz-8078	66	9100	50	0	nd	assumed	0	0	9100	50	0	0	Iosacal	10254	222	68	0
251	Poz-8084	67	8880	50	0	nd	assumed	0	0	8880	50	0	0	Iosacal	10042	144	273	0
252	Poz-6408	68	9840	50	0	nd	assumed	0	0	9840	50	0	0	Iosacal	11237	155	52	0
253	Poz-6409	69	10390	50	0	nd	assumed	0	0	10390	50	-148.511	32.8303	Iosacal	11196	245	194	0
254	Poz-6410	70	9950	50	0	nd	assumed	0	0	9950	50	-148.511	32.8303	Iosacal	10580	244	264	0
255	Poz-6411	71	10230	50	0	nd	assumed	0	0	10230	50	-148.511	32.8303	Iosacal	10992.5	199.5	242.5	0
256	Poz-6413	72	10330	50	0	nd	assumed	0	0	10330	50	-148.511	32.8303	Iosacal	11139	182	269	0
257	Poz-6412	73	10610	50	0	nd	assumed	0	0	10610	50	-148.511	32.8303	Iosacal	11493	263	244	0
258	Poz-6414	74	9840	50	0	nd	assumed	0	0	9840	50	-148.511	32.8303	Iosacal	10426.5	216.5	204.5	0
259	Poz-8082	75	1115	30	0	nd	assumed	0	0	1115	30	-148.511	32.8303	Iosacal	429.5	101.5	147.5	0
260	Poz-8079	76	1555	30	0	nd	assumed	0	0	1555	30	0	0	Iosacal	1465.62	55.375	93.625	0
261	Poz-13868	77	8410	40	0	nd	assumed	0	0	8410	40	0	0	Iosacal	9453.5	75.5	147.5	0
262	Poz-13869	78	8700	50	0	nd	assumed	0	0	8700	50	0	0	Iosacal	9601.5	287.5	59.5	0
263	Poz-13870	79	8730	50	0	nd	assumed	0	0	8730	50	0	0	Iosacal	9614.25	277.75	65.25	0
264	Poz-13872	80	8920	50	0	nd	assumed	0	0	8920	50	0	0	Iosacal	10048.4	170.625	227.375	0
265	Poz-13873	81	8770	50	0	nd	assumed	0	0	8770	50	0	0	Iosacal	9803.5	311.5	251.5	0
266	Poz-13874	82	8750	50	0	nd	assumed	0	0	8750	50	0	0	Iosacal	9742	367	194	0
267	Poz-13876	83	8900	50	0	nd	assumed	0	0	8900	50	0	0	Iosacal	10010.1	185.9	228.1	0
268	Poz-13877	84	8930	50	0	nd	assumed	0	0	8930	50	0	0	Iosacal	10049.4	169.625	151.375	0
269	Poz-13863	85	8930	50	0	nd	assumed	0	0	8930	50	0	0	Iosacal	10049.4	169.625	151.375	0
270	Poz-14174	86	10140	50	0	nd	assumed	0	0	10140	50	0	0	Iosacal	11712	228	307	0
271	Poz-14171	87	10050	50	0	nd	assumed	0	0	10050	50	-148.177	32.2226	Iosacal	10718.5	304.5	211.5	0
272	Poz-14175	88	9780	50	0	nd	assumed	0	0	9780	50	-148.177	32.2226	Iosacal	10331	230	161	0
273	Poz-8075	89	5110	40	0	nd	assumed	0	0	5110	40	-148.177	32.2226	Iosacal	5071.5	204.5	200.5	0
274	Poz-8070	90	5350	40	0	nd	assumed	0	0	5350	40	0	0	Iosacal	6135	140	135	0
275	Poz-8085	91	5400	35	0	nd	assumed	0	0	5400	35	0	0	Iosacal	6230.5	59.5	216.5	0
276	Poz-8086	92	5590	35	0	nd	assumed	0	0	5590	35	0	0	Iosacal	6358.67	83.3333	59.6667	0
277	Poz-7977	93	9020	50	0	nd	assumed	0	0	9020	50	0	0	Iosacal	10209.5	41.5	289.5	0
278	Poz-7978	94	10070	50	0	nd	assumed	0	0	10070	50	0	0	Iosacal	11536.2	281.833	185.167	0
279	Poz-13015	95	1355	35	0	nd	assumed	0	0	1355	35	-148.177	32.2226	Iosacal	605.5	127.5	115.5	0
280	Poz-13016	96	1555	30	0	nd	assumed	0	0	1555	30	-148.177	32.2226	Iosacal	783.5	142.5	124.5	0
281	Poz-14246	97	1615	30	0	nd	assumed	0	0	1615	30	0	0	Iosacal	1469	70	60	0
282	Poz-8076	98	1710	30	0	nd	assumed	0	0	1710	30	0	0	Iosacal	1605.83	91.1667	70.8333	0
283	Poz-8074	99	1925	30	0	nd	assumed	0	0	1925	30	0	0	Iosacal	1852.5	71.5	109.5	0
284	Poz-8154	100	2215	35	0	nd	assumed	0	0	2215	35	0	0	Iosacal	2228.5	103.5	102.5	0
285	Poz-8111	101	4815	35	0	nd	assumed	0	0	4815	35	0	0	Iosacal	5539.25	54.75	62.25	0
286	TUa-4423	102	12160	125	0	nd	assumed	0	0	12160	125	0	0	Iosacal	13995.8	826.25	230.75	0
287	TUa-4132	103	12160	125	0	nd	assumed	0	0	12160	125	0	0	Iosacal	13995.8	826.25	230.75	0
288	Tua-4130	104	12115	80	0	nd	assumed	0	0	12115	80	0	0	Iosacal	13970.2	221.75	177.25	0
289	Tua-3817	105	12115	80	0	nd	assumed	0	0	12115	80	0	0	Iosacal	13970.2	221.75	177.25	0
290	Tua-2032	106	10090	95	100	-26	measured	0	0	10090	137.931	0	0	Iosacal	11537.1	896.875	306.125	0
291	T-13447A	107	9835	130	100	-20.2	measured	0	0	9835	164.012	0	0	Iosacal	11437.7	381.333	698.667	0
292	Beta-127164	108	11950	40	0	-24.5	measured	0	0	11950	40	0	0	Iosacal	13867.2	155.833	253.167	1
293	T-13445A	109	9225	90	100	-28.7	measured	0	0	9225	134.536	0	0	Iosacal	10366	693	401	0
294	T-12593A	110	9610	160	100	-29.8	measured	0	0	9610	188.68	0	0	Iosacal	11003.2	594.833	702.167	0
295	T-14029	111	9545	105	0	-26.1	measured	0	0	9545	105	0	0	Iosacal	10881.3	298.667	300.333	0
296	Tua-971	112	13490	75	0	nd	assumed	0	0	13490	75	0	0	Iosacal	16262	251	243	0
297	Tua-972a	113	12560	70	0	nd	assumed	0	0	12560	70	-155.033	33.235	Iosacal	13646	672	502	0
298	Poz-6368	114	9520	50	0	nd	assumed	0	0	9520	50	-155.033	33.235	Iosacal	10030.5	179.5	262.5	0
299	Poz-6369	115	9780	50	0	nd	assumed	0	0	9780	50	0	0	Iosacal	11213.5	59.5	114.5	0
300	Poz-6370	116	9890	50	0	nd	assumed	0	0	9890	50	0	0	Iosacal	11277	324	76	0
301	Poz-6371	117	10080	50	0	nd	assumed	0	0	10080	50	0	0	Iosacal	11537.2	285.833	184.167	0
302	Poz-5130	118	10040	50	0	nd	assumed	0	0	10040	50	0	0	Iosacal	11560.5	247.5	238.5	0
303	Poz-5129	119	10050	50	0	nd	assumed	0	0	10050	50	0	0	Iosacal	11565.8	246.25	232.75	0
304	Poz-5185	120	9980	50	0	nd	assumed	0	0	9980	50	0	0	Iosacal	11472.3	221.667	214.333	0
305	Poz-5133	121	10090	60	0	nd	assumed	0	0	10090	60	0	0	Iosacal	11603.1	318.875	255.125	0
306	Poz-5134	122	10060	60	0	nd	assumed	0	0	10060	60	0	0	Iosacal	11568	253	245	0
307	Poz-5135	123	10170	60	0	nd	assumed	0	0	10170	60	0	0	Iosacal	11844.5	194.5	439.5	0
308	Poz-6372	124	10090	50	0	nd	assumed	0	0	10090	50	0	0	Iosacal	11668.9	197.125	314.875	0
309	Poz-5136	125	10270	50	0	nd	assumed	0	0	10270	50	0	0	Iosacal	11942.2	509.75	124.25	0
310	Poz-5184	126	10940	60	0	nd	assumed	0	0	10940	60	0	0	Iosacal	12829.5	227.5	79.5	0
311	Poz-5131	127	10910	60	0	nd	assumed	0	0	10910	60	0	0	Iosacal	12797.5	189.5	60.5	0
312	Poz-5132	128	12130	60	0	nd	assumed	0	0	12130	60	0	0	Iosacal	13974.8	172.25	167.75	0
313	Poz-5137	129	11720	60	0	nd	assumed	0	0	11720	60	0	0	Iosacal	13558.8	191.25	92.75	0
314	Poz-4811	130	10370	50	0	nd	assumed	0	0	10370	50	0	0	Iosacal	12281.3	195.667	308.333	0
315	Poz-4812	131	10820	60	0	nd	assumed	0	0	10820	60	0	0	Iosacal	12748.5	133.5	40.5	0
316	Poz-4813	132	11080	60	0	nd	assumed	0	0	11080	60	0	0	Iosacal	13005.5	96.5	164.5	0
317	Poz-4814	133	11070	50	0	nd	assumed	0	0	11070	50	0	0	Iosacal	13003.2	92.75	158.25	0
318	Poz-4815	134	11090	60	0	nd	assumed	0	0	11090	60	0	0	Iosacal	13040	69	198	0
319	Poz-4817	135	12090	50	0	nd	assumed	0	0	12090	50	0	0	Iosacal	13965	105	157	0
320	Poz-4818	136	12270	60	0	nd	assumed	0	0	12270	60	0	0	Iosacal	14166.5	639.5	116.5	0
321	Poz-4908	137	10700	70	0	nd	assumed	0	0	10700	70	0	0	Iosacal	12711	47	212	0
322	Poz-5095	138	11320	60	0	nd	assumed	0	0	11320	60	0	0	Iosacal	13203	106	93	0
323	Poz-5096	139	11440	70	0	nd	assumed	0	0	11440	70	0	0	Iosacal	13290.8	160.25	114.75	0
324	Poz-4909	140	11310	70	0	nd	assumed	0	0	11310	70	0	0	Iosacal	13164.2	146.75	65.25	0
325	Poz-4910	141	11310	60	0	nd	assumed	0	0	11310	60	0	0	Iosacal	13164.8	139.25	57.75	0
326	Poz-4911	142	11450	60	0	nd	assumed	0	0	11450	60	0	0	Iosacal	13326.2	126.833	145.167	0
327	Poz-4912	143	11430	60	0	nd	assumed	0	0	11430	60	0	0	Iosacal	13287.2	146.75	111.25	0
328	Poz-4819	144	11310	60	0	nd	assumed	0	0	11310	60	0	0	Iosacal	13164.8	139.25	57.75	0
329	Poz-4914	145	11470	60	0	nd	assumed	0	0	11470	60	0	0	Iosacal	13363.8	102.25	178.75	0
330	Poz-4915	146	11560	60	0	nd	assumed	0	0	11560	60	0	0	Iosacal	13403.5	170.5	92.5	0
331	Poz-4821	147	11720	60	0	nd	assumed	0	0	11720	60	0	0	Iosacal	13558.8	191.25	92.75	0
332	Poz-4922	148	11830	60	0	nd	assumed	0	0	11830	60	0	0	Iosacal	13667.2	127.75	151.25	0
333	Poz-4823	149	12040	60	0	nd	assumed	0	0	12040	60	0	0	Iosacal	13905.8	144.25	109.75	0
334	T-3303B	150	3400	290	100	nd	assumed	0	0	3400	306.757	0	0	Iosacal	3802.75	705.25	923.75	0
335	B-171188	151	5600	80	100	nd	assumed	0	0	5600	128.062	0	0	Iosacal	6425.25	299.75	408.25	0
336	B-171189	152	6560	40	100	nd	assumed	0	0	6560	107.703	0	0	Iosacal	7509.25	144.75	248.25	0
337	T-3302B	153	6580	110	100	nd	assumed	0	0	6580	148.661	0	0	Iosacal	7434	265	268	0
338	B-171190	154	6330	40	100	nd	assumed	0	0	6330	107.703	0	0	Iosacal	7243	186	281	1
339	B-171191	155	8170	80	100	nd	assumed	0	0	8170	128.062	0	0	Iosacal	9149.5	310.5	491.5	1
340	T-7566A	156	12920	260	100	nd	assumed	0	0	12920	278.568	0	0	Iosacal	15448	800	1127	1
341	T-7567A	157	11370	90	100	nd	assumed	0	0	11370	134.536	0	0	Iosacal	13243	331	236	1
342	T-7565A	158	10160	220	100	nd	assumed	0	0	10160	241.661	0	0	Iosacal	11730.7	931.333	538.667	1
343	T-7563A	159	11710	240	100	nd	assumed	0	0	11710	260	0	0	Iosacal	13596	627	513	1
344	T-7563B	160	12110	300	100	nd	assumed	0	0	12110	316.228	0	0	Iosacal	14023.4	1126.62	666.375	1
345	T-7562B	161	11990	230	100	nd	assumed	0	0	11990	250.799	0	0	Iosacal	13734.8	1109.17	386.833	1
346	T-1717	162	7050	140	100	nd	assumed	0	0	7050	172.047	0	0	Iosacal	7817.75	459.25	245.75	0
347	T-7424	163	6750	90	0	nd	assumed	0	0	6750	90	0	0	Iosacal	7618	157	187	0
348	Tua-3242	164	9315	70	0	nd	assumed	0	0	9315	70	0	0	Iosacal	10539	154	256	0
349	Beta-154058	165	5830	40	100	0	measured	-20	50	5810	118.743	0	0	Iosacal	6651	240	333	1
350	T-8987	166	4220	45	0	0	measured	-20	50	4200	67.2681	0	0	Iosacal	4736	124	207	0
351	Beta-154059	167	7420	50	100	0	measured	-20	50	7400	122.474	0	0	Iosacal	8158.25	248.75	180.25	1
352	Beta-154060	168	9210	40	100	0	measured	-20	50	9190	118.743	0	0	Iosacal	10402.8	297.25	433.75	1
353	Beta-154061	169	10160	40	100	0	measured	-20	50	10140	118.743	0	0	Iosacal	11655.8	783.167	388.833	1
354	Beta-154827	170	8010	40	0	0	measured	-20	50	7990	64.0312	0	0	Iosacal	8905.62	104.375	264.625	0
355	Beta-154062	171	11070	50	100	0	measured	-20	50	11050	122.474	0	0	Iosacal	12991.5	168.5	236.5	1
356	Beta-154063	172	10050	40	100	0	measured	-20	50	10030	118.743	0	0	Iosacal	11521.5	415.5	285.5	1
357	Beta-154064	173	9220	80	0	0	measured	-20	50	9200	94.3398	0	0	Iosacal	10404	238	202	0
358	Beta-154065	174	9710	90	0	0	measured	-20	50	9690	102.956	-130.921	33.2737	Iosacal	10269	311	349	0
359	T-6088B	175	9720	100	0	nd	assumed	0	0	9720	100	-130.921	33.2737	Iosacal	10297.5	339.5	301.5	0
360	T-6088A	176	9520	100	0	nd	assumed	0	0	9520	100	0	0	Iosacal	10909.4	264.625	337.375	0
361	T-6089	177	9240	120	0	nd	assumed	0	0	9240	120	0	0	Iosacal	10363.5	366.5	171.5	0
362	T-6090	178	7990	120	0	nd	assumed	0	0	7990	120	0	0	Iosacal	8806.25	455.75	263.25	0
363	Beta-136898	179	12190	50	0	-25.5	measured	0	0	12190	50	0	0	Iosacal	14085	224	206	0
364	TUa-3270	180	11955	80	0	-25.8	measured	0	0	11955	80	0	0	Iosacal	13889.8	148.25	281.75	0
365	Beta-136897	181	11180	40	0	-27.6	measured	0	0	11180	40	0	0	Iosacal	13126	46	120	0
366	Beta-136896	182	10050	40	0	-26.9	measured	0	0	10050	40	0	0	Iosacal	11564.2	241.8	218.2	0
367	Beta-136895	183	9970	40	0	-27.9	measured	0	0	9970	40	0	0	Iosacal	11398	287	140	0
368	TUa-3269	184	9660	50	0	-27.8	measured	0	0	9660	50	0	0	Iosacal	11016.5	184.5	232.5	0
369	TUa-3205	185	9455	60	0	-24.9	measured	0	0	9455	60	0	0	Iosacal	10650.8	418.25	138.75	0
370	TUa-2180	186	12505	95	0	1	measured	0	0	12505	95	0	0	Iosacal	14756.8	372.25	487.75	1
371	TUa-2173	187	12390	95	0	-29.8	measured	0	0	12390	95	-148.177	32.2226	Iosacal	13315	599	276	0
372	TUa-3204	188	11990	75	0	-29.3	measured	0	0	11990	75	0	0	Iosacal	13896.8	160.25	282.75	0
373	TUa-3267	189	11835	60	0	-27.8	measured	0	0	11835	60	0	0	Iosacal	13667.9	129.125	151.875	0
374	TUa-2174	190	11305	80	0	-27.3	measured	0	0	11305	80	0	0	Iosacal	13164.2	166.75	73.25	0
375	TUa-2175	191	10760	100	0	-25.9	measured	0	0	10760	100	0	0	Iosacal	12723.5	183.5	232.5	0
376	TUa-2176	192	10175	120	0	-28.4	measured	0	0	10175	120	0	0	Iosacal	11744.6	716.375	420.625	0
377	TUa-3266	193	10000	70	0	-26.2	measured	0	0	10000	70	0	0	Iosacal	11447.9	352.125	191.875	0
378	TUa-2177	194	9655	110	0	-26.5	measured	0	0	9655	110	0	0	Iosacal	10956.7	292.333	268.667	0
379	TUa-2178	195	9825	110	0	-28.2	measured	0	0	9825	110	0	0	Iosacal	11320.5	375.5	526.5	0
380	T-14130A	196	9565	65	100	-29.2	measured	0	0	9565	119.269	0	0	Iosacal	10910	293	335	0
381	T-14131A	197	9245	50	100	-30.3	measured	0	0	9245	111.803	0	0	Iosacal	10363	339	154	0
382	T-14132A	198	9015	75	100	-30.2	measured	0	0	9015	125	0	0	Iosacal	10031	462	322	0
383	Beta-175335	199	12330	160	0	-0.6	measured	0	0	12330	160	0	0	Iosacal	14528.8	534.25	664.75	0
384	TUa-4139	200	11830	70	0	1	measured	0	0	11830	70	-148.177	32.2226	Iosacal	13008	180	231	0
385	Beta-175334	201	11650	40	0	-24.9	measured	0	0	11650	40	-148.177	32.2226	Iosacal	12810.5	196.5	125.5	0
386	Beta-175333	202	11560	40	0	-27.3	measured	0	0	11560	40	0	0	Iosacal	13404	93	80	0
387	Beta-175332	203	11510	40	0	28.7	measured	0	0	11510	40	0	0	Iosacal	13375.5	88.5	68.5	0
388	Poz-2899	204	10980	50	0	-24.5	measured	0	0	10980	50	0	0	Iosacal	12915.5	148.5	150.5	0
389	Poz-2898	205	10590	40	0	-25.8	measured	0	0	10590	40	0	0	Iosacal	12647.5	61.5	157.5	0
390	Beta-175336	206	9820	40	0	-28.3	measured	0	0	9820	40	0	0	Iosacal	11228.5	82.5	47.5	0
391	TUa-3268	207	9150	55	0	-26.4	measured	0	0	9150	55	0	0	Iosacal	10320.3	171.667	97.3333	0
392	TUa-2179	208	9415	90	0	-29.7	measured	0	0	9415	90	0	0	Iosacal	10587	488	278	0
393	T-12552A	209	6545	145	100	0	measured	0	0	6545	176.139	0	0	Iosacal	7459.67	280.333	445.667	0
394	Ua-15731	210	10115	160	0	-24.6	measured	0	0	10115	160	0	0	Iosacal	11655	805	416	0
395	Ua-15732	211	10285	165	0	-24.9	measured	0	0	10285	165	0	0	Iosacal	12234.8	381.214	832.786	0
396	Ua-15733	212	11505	200	0	-26.6	measured	0	0	11505	200	0	0	Iosacal	13325.8	470.25	323.75	0
397	Tua-2083	213	11135	60	0	0.7	measured	0	0	11135	60	0	0	Iosacal	13047.8	114.25	140.75	0
398	Tua-2084	214	12440	55	0	1.6	measured	0	0	12440	55	-148.177	32.2226	Iosacal	13357.5	515.5	242.5	0
399	Tua-2085	215	12330	40	0	2.7	measured	0	0	12330	40	-148.177	32.2226	Iosacal	13516.5	199.5	178.5	1
400	T-13877	216	12320	165	0	1	measured	0	0	12320	165	-148.177	32.2226	Iosacal	13503.5	455.5	366.5	1
401	Tua-2086	217	12490	55	0	0	measured	0	0	12490	55	-148.177	32.2226	Iosacal	13407	512	247	1
402	T-8877	218	7755	45	0	nd	assumed	0	0	7755	45	-148.177	32.2226	Iosacal	7885.5	148.5	189.5	0
403	T-8884	219	7465	125	0	nd	assumed	0	0	7465	125	0	0	Iosacal	8275	242	260	0
404	T-8438	220	4760	60	0	nd	assumed	0	0	4760	60	0	0	Iosacal	5510.25	80.75	185.25	0
405	T-8443	221	4860	100	0	nd	assumed	0	0	4860	100	0	0	Iosacal	5559.25	329.75	235.25	0
406	Beta-126386	222	2320	50	100	nd	assumed	0	0	2320	111.803	0	0	Iosacal	2298.88	420.125	233.875	#REF!
407	Beta-126388	223	2150	50	100	nd	assumed	0	0	2150	111.803	0	0	Iosacal	2139	216	309	0
408	Beta-126390	224	9610	70	100	nd	assumed	0	0	9610	122.066	0	0	Iosacal	11029.9	204.125	441.875	0
409	T-13779A	225	7445	55	100	nd	assumed	0	0	7445	114.127	0	0	Iosacal	8265	164	251	0
410	T-13778A	226	4965	115	100	nd	assumed	0	0	4965	152.398	0	0	Iosacal	5763	398	441	0
411	T-1716	227	3730	100	0	nd	assumed	0	0	3730	100	0	0	Iosacal	4140.5	264.5	298.5	0
412	T-1715	228	2880	210	0	nd	assumed	0	0	2880	210	0	0	Iosacal	3107.5	449.5	617.5	0
413	T-1714	229	2320	80	0	nd	assumed	0	0	2320	80	0	0	Iosacal	2276.75	422.25	154.75	0
414	T-3346	230	11380	95	0	nd	assumed	0	0	11380	95	0	0	Iosacal	13232.5	208.5	121.5	0
415	T-10 801	231	11240	75	0	nd	assumed	0	0	11240	75	-162.366	59.7734	Iosacal	12470.5	205.5	371.5	0
416	T-3719	232	11100	30	0	nd	assumed	0	0	11100	30	-162.366	59.7734	Iosacal	12271.5	221.5	323.5	0
417	Tua-1399A	233	10480	50	100	nd	assumed	0	0	10480	111.803	-162.366	59.7734	Iosacal	11298.5	457.5	364.5	0
418	T-4134A	234	10040	0	100	nd	assumed	0	0	10040	100	0	0	Iosacal	11553.3	371.667	302.333	0
419	T-10802	235	10040	70	0	nd	assumed	0	0	10040	70	0	0	Iosacal	11575.5	237.5	295.5	0
420	T-2748	236	9375	30	0	nd	assumed	0	0	9375	30	-162.366	59.7734	Iosacal	9782.5	287.5	242.5	0
421	T-2747	237	6395	95	0	nd	assumed	0	0	6395	95	-165.803	59.7426	Iosacal	6467	283	268	0
422	T-3106	238	5700	80	100	nd	assumed	0	0	5700	128.062	-163.249	59.2281	Iosacal	5722.5	367.5	321.5	0
423	T-3107	239	4340	70	100	nd	assumed	0	0	4340	122.066	0	0	Iosacal	5071.75	235.25	491.75	0
424	T-2255	240	4000	50	100	nd	assumed	0	0	4000	111.803	0	0	Iosacal	4442.38	381.625	287.375	0
425	Tua-1122	241	7175	75	0	nd	assumed	0	0	7175	75	0	0	Iosacal	7980.5	191.5	132.5	0
426	B1998-notlisted-1	242	6620	85	100	nd	assumed	0	0	6620	131.244	0	0	Iosacal	7512.75	200.25	252.75	1
427	B1998-notlisted-2	243	4960	120	100	nd	assumed	0	0	4960	156.205	0	0	Iosacal	5763.25	399.75	442.25	0
428	T-4417	244	3320	80	0	nd	assumed	0	0	3320	80	0	0	Iosacal	3567	253	191	0
429	T-4418	245	3240	80	0	nd	assumed	0	0	3240	80	0	0	Iosacal	3491.75	194.25	236.75	0
430	T-4419	246	3530	50	0	nd	assumed	0	0	3530	50	0	0	Iosacal	3804.75	161.25	156.75	0
431	T-4420	247	3600	70	0	nd	assumed	0	0	3600	70	0	0	Iosacal	3922.5	214.5	223.5	0
432	T-4422	248	2630	90	0	nd	assumed	0	0	2630	90	0	0	Iosacal	2779.5	173.5	346.5	0
433	T-4423	249	2800	110	0	nd	assumed	0	0	2800	110	0	0	Iosacal	2899	317	169	0
434	T-4424	250	3780	100	0	nd	assumed	0	0	3780	100	0	0	Iosacal	4153.67	266.333	270.667	0
435	T-4425	251	2230	80	0	nd	assumed	0	0	2230	80	0	0	Iosacal	2258.75	141.25	263.75	0
436	Tua-416	252	7595	80	0	nd	assumed	0	0	7595	80	0	0	Iosacal	8414.75	131.25	217.75	0
437	Tua-415	253	9550	110	0	nd	assumed	0	0	9550	110	0	0	Iosacal	10908.5	278.5	328.5	1
438	T-9619A	254	9665	125	100	nd	assumed	0	0	9665	160.078	0	0	Iosacal	10972.4	627.625	462.375	#REF!
439	Ua-2586	255	10065	125	100	nd	assumed	0	0	10065	160.078	0	0	Iosacal	11687.2	757.75	488.25	1
440	T-10148	256	8300	100	0	-26.1	measured	0	0	8300	100	0	0	Iosacal	9252	229	226	1
441	Ua-2584	257	8400	95	100	nd	assumed	0	0	8400	137.931	0	0	Iosacal	9435.17	221.833	422.167	0
442	T-9618A	258	10935	135	100	nd	assumed	0	0	10935	168.003	0	0	Iosacal	12897	271	274	1
443	Ua-2585	259	6150	180	100	nd	assumed	0	0	6150	205.913	0	0	Iosacal	7038.83	390.167	534.833	1
444	T-9654A	260	8485	120	100	-32.1	measured	0	0	8485	156.205	0	0	Iosacal	9408.25	486.75	381.25	#REF!
445	TUa-869A	261	9315	85	100	nd	assumed	0	0	9315	131.244	0	0	Iosacal	10562	507	336	0
446	TUa-870A	262	9200	95	100	nd	assumed	0	0	9200	137.931	0	0	Iosacal	10407.8	350.25	488.75	1
447	Tua-978	263	10545	75	100	nd	assumed	0	0	10545	125	0	0	Iosacal	12587	150	583	0
448	T-11488	264	9545	95	100	nd	assumed	0	0	9545	137.931	0	0	Iosacal	10913.3	308.667	411.333	0
449	Tua-874A	265	8670	95	100	nd	assumed	0	0	8670	137.931	0	0	Iosacal	9763.5	396.5	300.5	0
450	Tua-977	266	8780	85	100	nd	assumed	0	0	8780	131.244	0	0	Iosacal	9782.75	392.25	238.75	0
451	Tua-873A	267	7760	95	100	nd	assumed	0	0	7760	137.931	0	0	Iosacal	8568.5	423.5	226.5	#REF!
452	Tua-1350	268	7315	70	0	-22.9	measured	0	0	7315	70	0	0	Iosacal	8121.17	196.833	143.167	0
453	Tua-1270	269	7350	80	0	-22.3	measured	0	0	7350	80	0	0	Iosacal	8123.83	220.167	110.833	0
454	T-11251A	270	8180	150	100	-22.3	measured	0	0	8180	180.278	0	0	Iosacal	9270.25	253.75	660.25	0
455	T-11704A	271	7320	80	100	-31	measured	0	0	7320	128.062	0	0	Iosacal	8106	273	229	0
456	T-11203A	272	9590	90	100	-26.3	measured	0	0	9590	134.536	0	0	Iosacal	10991.3	249.667	425.333	1
457	T-11204A	273	9765	105	100	-26.9	measured	0	0	9765	145	0	0	Iosacal	11054.6	636.375	355.625	0
458	T-4162	274	7490	90	100	-32.1	measured	0	0	7490	134.536	0	0	Iosacal	8280.75	258.25	256.75	0
459	T-10594A	275	7430	95	100	-29.5	measured	0	0	7430	137.931	0	0	Iosacal	8262.5	252.5	295.5	0
460	T-11248A	276	9795	160	100	-21	measured	0	0	9795	188.68	0	0	Iosacal	10991.8	833.167	399.833	0
461	T-249B	277	11500	300	100	0	measured	0	0	11500	316.228	0	0	Iosacal	13454.5	581.5	686.5	0
462	Tua-665A	278	5685	65	100	-27.7	measured	0	0	5685	119.269	0	0	Iosacal	6536.25	208.75	315.25	0
463	Tua-934A	279	6995	75	100	-27.2	measured	0	0	6995	125	0	0	Iosacal	7859.75	162.25	268.75	0
464	Tua-664A	280	7210	65	100	-27.7	measured	0	0	7210	119.269	0	0	Iosacal	8082.5	238.5	292.5	0
465	Tua-718A	281	5090	55	100	-29.9	measured	0	0	5090	114.127	0	0	Iosacal	5830	345	238	0
466	Tua-720A	282	7160	60	100	-29.9	measured	0	0	7160	116.619	0	0	Iosacal	8004.17	186.833	301.167	0
467	Ua-3827	283	3635	70	100	0	measured	0	0	3635	122.066	0	0	Iosacal	3991.5	360.5	399.5	0
468	Ua-3828	284	6835	85	100	0	measured	0	0	6835	131.244	0	0	Iosacal	7664	269	229	1
469	Tua-719A	285	5240	60	100	-27.9	measured	0	0	5240	116.619	0	0	Iosacal	6069.62	211.375	323.625	0
470	T-10495A	286	3760	105	100	0	measured	0	0	3760	145	0	0	Iosacal	4196.75	326.25	494.75	0
471	T-10499A	287	7385	110	100	0	measured	0	0	7385	148.661	0	0	Iosacal	8180.67	270.333	305.667	0
472	T-10500A	288	7175	75	100	0	measured	0	0	7175	125	0	0	Iosacal	8030.75	272.25	320.75	0
473	T-10501A	289	7405	95	100	0	measured	0	0	7405	137.931	0	0	Iosacal	8159.75	285.25	215.75	0
474	Tua-717	290	7330	70	100	-26.8	measured	0	0	7330	122.066	0	0	Iosacal	8108	267	169	0
475	TUa-932A	291	5010	70	100	-28	measured	0	0	5010	122.066	0	0	Iosacal	5724.83	375.167	247.833	0
476	TUa-1039A	292	2490	80	100	-28.3	measured	0	0	2490	128.062	0	0	Iosacal	2624.67	225.333	442.667	0
477	TUa-933A	293	3800	60	100	-29.1	measured	0	0	3800	116.619	0	0	Iosacal	4184	334	332	0
478	Tua-1038A	294	1530	75	100	-29.6	measured	0	0	1530	125	0	0	Iosacal	1446.33	257.667	268.333	0
479	Tua-928A	295	3020	65	100	-28.8	measured	0	0	3020	119.269	0	0	Iosacal	3180.5	271.5	300.5	0
480	Tua-929A	296	3355	70	100	-29.5	measured	0	0	3355	122.066	0	0	Iosacal	3619.5	336.5	345.5	0
481	Tua-930A	297	8495	80	100	-26.9	measured	0	0	8495	128.062	0	0	Iosacal	9408.25	479.75	368.25	0
482	Tua-931A	298	8950	75	100	-26	measured	0	0	8950	125	0	0	Iosacal	10026.1	342.875	466.125	0
483	Tua-1037A	299	3845	80	100	nd	assumed	0	0	3845	128.062	0	0	Iosacal	4319	463	443	0
484	T-1183 lA	300	5625	75	100	nd	assumed	0	0	5625	125	0	0	Iosacal	6412.67	319.333	285.667	0
485	T-11834A	301	5520	100	100	nd	assumed	0	0	5520	141.421	0	0	Iosacal	6330.67	299.333	380.667	0
486	T-11832A	302	9415	105	100	nd	assumed	0	0	9415	145	0	0	Iosacal	10892	249	616	0
487	T-11830A	303	10660	290	100	nd	assumed	0	0	10660	306.757	0	0	Iosacal	12325.8	842.25	919.75	0
488	T-11830B	304	9465	100	100	nd	assumed	0	0	9465	141.421	0	0	Iosacal	10893.8	290.25	586.75	0
489	T-11809A	305	10105	285	100	nd	assumed	0	0	10105	302.035	0	0	Iosacal	11787.8	899.25	992.75	0
490	TUa-909	306	11405	100	100	nd	assumed	0	0	11405	141.421	0	0	Iosacal	13260.5	324.5	182.5	0
491	TUa-910	307	11295	110	100	nd	assumed	0	0	11295	148.661	0	0	Iosacal	13229.5	239.5	379.5	1
492	TUa-911	308	11600	85	100	nd	assumed	0	0	11600	131.244	0	0	Iosacal	13463.2	290.833	275.167	0
493	GX-16322	309	4715	100	0	+0.9	measured	0	0	4715	100	0	0	Iosacal	5459.5	194.5	404.5	0
494	GX-17283	310	6395	185	0	-25.9	measured	0	0	6395	185	-238	55	Iosacal	6402.5	438.5	459.5	0
495	AA-12478	311	7940	75	0	0 (assumed)	measured	0	0	7940	75	0	0	Iosacal	8837.67	157.333	238.667	0
496	AA-12479	312	5255	130	0	0 (assumed)	measured	0	0	5255	130	-238	55	Iosacal	5152	355	363	#REF!
497	GX-18587	313	9040	390	0	+1.5	measured	0	0	9040	390	-238	55	Iosacal	9278	1009	972	0
498	GX-17284	314	6515	85	0	+1.5	measured	0	0	6515	85	-238	55	Iosacal	6520.5	263.5	250.5	#REF!
499	GX-18213	315	5740	85	0	+2.1	measured	0	0	5740	85	-238	55	Iosacal	5674	266	237	0
500	GX-18214	316	6225	85	0	+1.9	measured	0	0	6225	85	-238	55	Iosacal	6210.5	243.5	273.5	0
501	GX-18212	317	6855	90	0	+1.6	measured	0	0	6855	90	-238	55	Iosacal	6897.5	283.5	273.5	0
502	GX-18211	318	6210	85	0	-1.4	measured	0	0	6210	85	-238	55	Iosacal	6198.5	238.5	272.5	0
503	GX-18210	319	4760	75	0	-1.1	measured	0	0	4760	75	-238	55	Iosacal	4514	293	267	0
504	GX-18586	320	1175	80	0	-27	measured	0	0	1175	80	-238	55	Iosacal	389	202	245	0
505	T-10504	321	3125	70	100	0	measured	0	0	3125	122.066	0	0	Iosacal	3377.5	240.5	411.5	0
506	T-10505	322	7815	95	100	0	measured	0	0	7815	137.931	0	0	Iosacal	8585	413	203	0
507	T-10494A	323	9055	100	100	0	measured	0	0	9055	141.421	0	0	Iosacal	10158.7	409.333	430.667	0
508	T-11029	324	7060	110	100	0	measured	0	0	7060	148.661	0	0	Iosacal	7879.5	293.5	261.5	0
509	T-10495A	325	3760	105	100	0	measured	0	0	3760	145	0	0	Iosacal	4196.75	326.25	494.75	0
510	T-10496A	326	3960	120	100	0	measured	0	0	3960	156.205	0	0	Iosacal	4473.75	361.25	487.75	0
511	T-10497A	327	5310	125	100	0	measured	0	0	5310	160.078	0	0	Iosacal	6102.17	300.833	437.167	0
512	T-10498A	328	7095	130	100	0	measured	0	0	7095	164.012	0	0	Iosacal	7862.5	426.5	257.5	0
513	T-10499A	329	7385	110	100	0	measured	0	0	7385	148.661	0	0	Iosacal	8180.67	270.333	305.667	0
514	T-10500A	330	7175	75	100	0	measured	0	0	7175	125	0	0	Iosacal	8030.75	272.25	320.75	0
515	T-10501A	331	7405	95	100	0	measured	0	0	7405	137.931	0	0	Iosacal	8159.75	285.25	215.75	0
[truncated: 586 more rows]

## Sheet: Short-form
Unique sample ID	Reference	Region code	Sub-region	Latitude	Longitude	Dating method	Corrected age (14C a BP)	Corrected age uncertainty (14C a)	Age (cal a BP)	Age 2σ Uncertainty + (cal a)	Age 2σ Uncertainty - (cal a)	Tendency	Sample depth/overburden thickness (m)	Depth to consolidated substrate (m)	Intercalated	Sample elevation (m)	Elevation datum (m)	Sample elevation uncertainty + (m)	Sample elevation uncertainty - (m)	Type	Primary indicator type	Secondary indicator type	Supporting evidence	Sample indicative meaning	RSL (m)	RSL 2σ Uncertainty + (m)	RSL 2σ Uncertainty - (m)	Corrected RSL (m)	Corrected RSL uncertainty + (m)	Corrected RSL uncertainty - (m)	Correction type	Reject	Why reject?	Notes
[truncated: 1,102 more rows]
